# Supplementary material
Source: publisher figshare collection journal article supplement (https://acs.figshare.com/ndownloader/files/6864441)

# **Supporting Information**

**For**

## **$\beta$ -Stereoselective mannosylation using 2,6-lactones**

*Yusuke Hashimoto, Saki Tanikawa, Ryota Saito, Kaname Sasaki\**

*Department of Chemistry, Toho University, 2-2-1 Miyama, Funabashi 274-8510 Japan*

| Compounds                                                                                                                                                                                                            | Expt. | Spectra |
|----------------------------------------------------------------------------------------------------------------------------------------------------------------------------------------------------------------------|-------|---------|
| <b>Scheme 2</b>                                                                                                                                                                                                      | S4    | –       |
| Allyl 3- <i>O</i> -benzyl- $\alpha$ -D-mannopyranoside (2)                                                                                                                                                           | S4    | S23     |
| Allyl 3- <i>O</i> -benzyl- $\alpha$ -D-mannopyranurono-2,6-lactone (3)                                                                                                                                               | S4    | S24     |
| Allyl 3,4-di- <i>O</i> -benzyl- $\alpha$ -D-mannopyranurono-2,6-lactone (4a)                                                                                                                                         | S4    | S26     |
| Allyl 3- <i>O</i> -benzyl-4- <i>O</i> - <i>tert</i> -butyldimethylsilyl- $\alpha$ -D-mannopyranurono-2,6-lactone (4b)                                                                                                | S5    | S28     |
| 3,4-Di- <i>O</i> -benzyl-D-mannopyranurono-2,6-lactone (S1)                                                                                                                                                          | S5    | S30     |
| 3,4-Di- <i>O</i> -benzyl- $\alpha$ -D-mannopyranurono-2,6-lacton-1-yl diethylphosphite (5a)                                                                                                                          | S6    | S32     |
| 3,4-Di- <i>O</i> -benzyl- $\alpha$ -D-mannopyranurono-2,6-lacton-1-yl iodide (5b)                                                                                                                                    | S6    | S34     |
| 3,4-Di- <i>O</i> -benzyl-D-mannopyranurono-2,6-lactone-1-yl trichloroacetimidate (5c)                                                                                                                                | S6    | S37     |
| 3- <i>O</i> -Benzyl-4- <i>O</i> - <i>tert</i> -butyldimethylsilyl-D-mannopyranurono-2,6-lactone-1-yl trichloroacetimidate (5d)                                                                                       | S7    | S42     |
| <b>Table 1</b>                                                                                                                                                                                                       | S7    | –       |
| Methyl 2,3,4-tri- <i>O</i> -benzyl-6- <i>O</i> -(3',4'-di- <i>O</i> -benzyl- $\beta$ -D-mannopyranurono-2',6'-lacton-1'-yl)- $\alpha$ -D-glucopyranoside (7a $\beta$ )                                               | S7    | S47     |
| Methyl 2,3,4-tri- <i>O</i> -benzyl-6- <i>O</i> -(3',4'-di- <i>O</i> -benzyl- $\alpha$ -D-mannopyranurono-2',6'-lacton-1'-yl)- $\alpha$ -D-glucopyranoside (7a $\alpha$ )                                             | S7    | S50     |
| <b>Table 2</b>                                                                                                                                                                                                       | S9    | –       |
| Methyl 2,3- <i>O</i> -isopropylidene-4- <i>O</i> -(3',4'-di- <i>O</i> -benzyl- $\beta$ -D-mannopyranurono-2',6'-lacton-1'-yl)- $\alpha$ -L-rhamnopyranoside (7b $\beta$ )                                            | S9    | S52     |
| Allyl 2- <i>O</i> -(3',4'-di- <i>O</i> -benzyl- $\beta$ -D-mannopyranurono-2',6'-lacton-1'-yl)-3- <i>O</i> -benzyl-4,6- <i>O</i> -benzylidene- $\alpha$ -D-mannopyranoside (7c $\beta$ )                             | S10   | S55     |
| Methyl 2- <i>O</i> -(3',4'-di- <i>O</i> -benzyl- $\beta$ -D-mannopyranurono-2',6'-lacton-1'-yl)-3- <i>O</i> -benzyl-4,6- <i>O</i> -benzylidene- $\alpha$ -D-glucopyranoside (7d $\beta$ )                            | S10   | S58     |
| Methyl 2,3,6-tri- <i>O</i> -benzyl-4- <i>O</i> -(3',4'-di- <i>O</i> -benzyl- $\beta$ -D-mannopyranurono-2',6'-lacton-1'-yl)- $\alpha$ -D-glucopyranoside (7e $\beta$ )                                               | S11   | S61     |
| Methyl 2,3,4-tri- <i>O</i> -benzyl-6- <i>O</i> -(3'-di- <i>O</i> -benzyl-4'- <i>O</i> - <i>tert</i> -butyldimethylsilyl- $\beta$ -D-mannopyranurono-2',6'-lacton-1'-yl)- $\alpha$ -D-glucopyranoside (7f $\beta$ )   | S11   | S64     |
| Methyl 2,3,4-tri- <i>O</i> -benzyl-6- <i>O</i> -(3'-di- <i>O</i> -benzyl-4'- <i>O</i> - <i>tert</i> -butyldimethylsilyl- $\alpha$ -D-mannopyranurono-2',6'-lacton-1'-yl)- $\alpha$ -D-glucopyranoside (7f $\alpha$ ) | S11   | S67     |
| <b>Scheme S1.</b> Preparations of the authentic samples of the $\alpha$ -glycosides.                                                                                                                                 | S12   | –       |
| 2,6-Di- <i>O</i> -acetyl-3,4-di- <i>O</i> -benzyl-D-mannopyranosyl diphenylphosphate (S3)                                                                                                                            | S12   | S69     |
| Methyl 2,3- <i>O</i> -isopropylidene-4- <i>O</i> -(2',6'-di- <i>O</i> -acetyl-3',4'-di- <i>O</i> -benzyl- $\alpha$ -D-mannopyranosyl)- $\alpha$ -L-rhamnopyranoside (S4b)                                            | S13   | S71     |
| Allyl 2- <i>O</i> -(2',6'-di- <i>O</i> -acetyl-3',4'-di- <i>O</i> -benzyl- $\alpha$ -D-mannopyranosyl)-3- <i>O</i> -benzyl-4,6- <i>O</i> -benzylidene- $\alpha$ -D-mannopyranoside (S4c)                             | S14   | S73     |
| Methyl 2- <i>O</i> -(2',6'-di- <i>O</i> -acetyl-3',4'-di- <i>O</i> -benzyl- $\alpha$ -D-mannopyranosyl)-3- <i>O</i> -benzyl-4,6- <i>O</i> -benzylidene- $\alpha$ -D-glucopyranoside (S4d)                            | S14   | S75     |
| Methyl 2,3- <i>O</i> -isopropylidene-4- <i>O</i> -(3',4'-di- <i>O</i> -benzyl- $\alpha$ -D-mannopyranosyl)-                                                                                                          | S15   | S77     |

|                                                                                                                                                                                                                       |     |      |
|-----------------------------------------------------------------------------------------------------------------------------------------------------------------------------------------------------------------------|-----|------|
| <b><math>\alpha</math>-L-rhamnopyranoside (S5b)</b>                                                                                                                                                                   |     |      |
| <b>Allyl 2-<i>O</i>-(3',4'-di-<i>O</i>-benzyl-<math>\alpha</math>-D-mannopyranosyl)-3-<i>O</i>-benzyl-4,6-<i>O</i>-benzylidene-<math>\alpha</math>-D-mannopyranoside (S5c)</b>                                        | S15 | S79  |
| <b>Methyl 2-<i>O</i>-(3',4'-di-<i>O</i>-benzyl-<math>\alpha</math>-D-mannopyranosyl)-3-<i>O</i>-benzyl-4,6-<i>O</i>-benzylidene-<math>\alpha</math>-D-glucopyranoside (S5d)</b>                                       | S15 | S81  |
| <b>Methyl 2,3,6-tri-<i>O</i>-benzyl-4-<i>O</i>-(3',4'-di-<i>O</i>-benzyl-<math>\alpha</math>-D-mannopyranosyl)-<math>\alpha</math>-D-glucopyranoside (S5e)</b>                                                        | S16 | S83  |
| <b>Methyl 2,3-<i>O</i>-isopropylidene-4-<i>O</i>-(3',4'-di-<i>O</i>-benzyl-<math>\alpha</math>-D-mannopyranurono-2',6'-lacton-1'-yl)-<math>\alpha</math>-L-rhamnopyranoside (7b<math>\alpha</math>)</b>               | S16 | S85  |
| <b>Allyl 2-<i>O</i>-(3',4'-di-<i>O</i>-benzyl-<math>\alpha</math>-D-mannopyranurono-2',6'-lacton-1'-yl)-3-<i>O</i>-benzyl-4,6-<i>O</i>-benzylidene-<math>\alpha</math>-D-mannopyranoside (7c<math>\alpha</math>)</b>  | S17 | S87  |
| <b>Methyl 2-<i>O</i>-(3',4'-di-<i>O</i>-benzyl-<math>\alpha</math>-D-mannopyranurono-2',6'-lacton-1'-yl)-3-<i>O</i>-benzyl-4,6-<i>O</i>-benzylidene-<math>\alpha</math>-D-glucopyranoside (7d<math>\alpha</math>)</b> | S17 | S89  |
| <b>Methyl 2,3,6-tri-<i>O</i>-benzyl-4-<i>O</i>-(3',4'-di-<i>O</i>-benzyl-<math>\alpha</math>-D-mannopyranurono-2',6'-lacton-1'-yl)-<math>\alpha</math>-D-glucopyranoside (7e<math>\alpha</math>)</b>                  | S17 | S91  |
| <b>Scheme 3</b>                                                                                                                                                                                                       | S18 | –    |
| <b>Methyl 2,3,4-tri-<i>O</i>-benzyl-6-<i>O</i>-(3',4'-di-<i>O</i>-benzyl-<math>\beta</math>-D-mannopyranosyl)-<math>\alpha</math>-D-glucopyranoside (8)</b>                                                           | S18 | S93  |
| <b>Methyl 2,3,4-tri-<i>O</i>-benzyl-6-<i>O</i>-(methyl(3',4'-di-<i>O</i>-benzyl-<math>\beta</math>-D-mannopyranosyl)uronate)-<math>\alpha</math>-D-glucopyranoside (9)</b>                                            | S18 | S95  |
| <b>Table 3</b>                                                                                                                                                                                                        | S19 | –    |
| <b>3,4-Di-<i>O</i>-benzyl-<math>\alpha</math>-D-mannopyranurono-2,6-lacton-1-yl diphenylphosphate (10)</b>                                                                                                            | S19 | S97  |
| <b>3-(3',4'-Di-<i>O</i>-benzyl-<math>\beta</math>-D-mannopyranurono-2',6'-lacton-1'-yl)propene (11)</b>                                                                                                               | S19 | S100 |
| <b>Table 4</b>                                                                                                                                                                                                        | S20 | –    |
| <b>Scheme S2. Preparations of 2,6-anhydro sugar 12.</b>                                                                                                                                                               | S20 | –    |
| <b>Ethyl 1-thio-3,4-di-<i>O</i>-benzyl-6-<i>O</i>-tosyl-<math>\alpha</math>-D-mannopyranoside (S7)</b>                                                                                                                | S20 | S103 |
| <b>Ethyl 1-thio-3,4-di-<i>O</i>-benzyl-2,6-anhydro-<math>\alpha</math>-D-mannopyranoside (S8)</b>                                                                                                                     | S21 | S105 |
| <b>3,4-Di-<i>O</i>-benzyl-2,6-anhydro-<math>\beta</math>-D-mannopyranosyl trichloroacetimidate (12)</b>                                                                                                               | S21 | S107 |

## General Information

Analytical thin layer chromatography (TLC) was performed using Merck KGaA TLC 60F-254 plates (0.25 mm), and visualization was accomplished by 10 % sulfuric acid in EtOH or PMA (Phosphomolybdic acid), followed by heating or UV irradiation (254 nm). Specific rotations were measured on an automatic polarimeter with a path length of 50 mm in the solvent specified. Concentrations are given in g/100 mL. Optical rotations were measured on a JASCO P-2200 photoelectric polarimeter.  $^1\text{H}$  and  $^{13}\text{C}$  NMR spectra were recorded on a JEOL Ltd. JNM-ECP400 series (400 MHz). Chemical shifts ( $\delta$ ) are reported in parts per million (ppm) downfield or upfield from tetramethylsilane ( $\delta$  0.00),  $(\text{CD}_3)_2\text{CO}$  ( $\delta$  2.05) or  $\text{CHCl}_3$  ( $\delta$  7.26), integration, multiplicity (s = singlet, d = doublet, t = triplet, q = quartet, and m = multiplet) and coupling constants (Hz).  $^{13}\text{C}$  chemical shifts are reported in ppm downfield or upfield from  $(\text{CD}_3)_2\text{CO}$  ( $\delta$  29.8, 206.3) and  $\text{CDCl}_3$  ( $\delta$  77.36). High-resolution mass spectra (HRMS) were recorded on a JEOL Ltd. AccuTOFCS JIMS-T100CS with an electrospray ionization (ESI) source coupled. Silica-gel column chromatography was performed on FUJI SILYSIA CHEMICAL Ltd. Silica Gel PSQ60B 46-50  $\mu\text{m}$  (spherical, neutral). HPLC analysis was performed JASCO 860-CO (Column Oven), JASCO

880-31 (Solvent Mixing Module), JASCO 880-50 (3-Line Degasser), JASCO 880-PU (Intelligent HPLC Pump), JASCO 875-UV (Intelligent UV/Vis Detector, 254 nm) and JASCO 807-IT (Integrator).

## Scheme 2

### Allyl 3-*O*-benzyl- $\alpha$ -D-mannopyranoside (**2**)

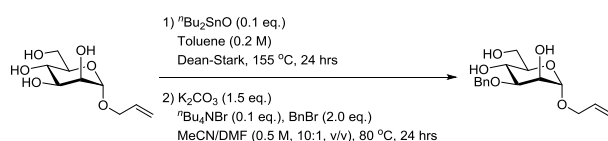

Under Ar atmosphere, to a solution of **1**<sup>[1]</sup> (6.38 g, 29.0 mmol) in toluene (145.0 ml) was added  $t$ -Bu<sub>2</sub>SnO (0.72 g, 2.90 mmol) at room temperature and the mixture was refluxed and stirred for 24 hrs. The mixture was cooled to room temperature and concentrated *in vacuo*. Under Ar atmosphere, to a solution of crude product in MeCN (52.7 ml) and DMF (5.3 ml) were added K<sub>2</sub>CO<sub>3</sub> (6.01 g, 43.5 mmol) and  $t$ -Bu<sub>4</sub>NBr (0.93 g, 2.90 mmol) at room temperature. After stirring for 10 min, BnBr (6.94 ml, 58.0 mmol) was added and the reaction was stirred at 80 °C for 24 hrs. After the mixture was cooled to room temperature, it was filtrated through Slicagel pad and concentrated *in vacuo*. The residue was purified by flash column chromatography (50 g, Hexane → Hexane/EtOAc = 3/1 → Hexane/EtOAc = 1/1 → Hexane/EtOAc = 3/7), which gave the title compound **2** (3.65 g, 41%) in 2 steps as brown oil. The spectra of the obtained compound is identical to the reported ones.<sup>[2]</sup>

### Allyl 3-*O*-benzyl- $\alpha$ -D-mannopyranurono-2,6-lactone (**3**)

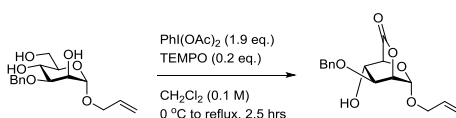

Under Ar atmosphere, to a solution of **2** (387.0 mg, 1.25 mmol) and PhI(OAc)<sub>2</sub> (0.76 g, 2.37 mmol) in anhydrous CH<sub>2</sub>Cl<sub>2</sub> (12.5 ml) was added TEMPO (39.1 mg, 250.0 μmol) at 0 °C. After stirring for 30 min, reaction temperature was raised to reflux and the mixture was stirred for 2 hrs. After the TLC analysis showed the completion of reaction, the reaction was quenched by 10% Na<sub>2</sub>S<sub>2</sub>O<sub>3</sub> aq. and the mixture was extracted with CH<sub>2</sub>Cl<sub>2</sub>. The combined organic layer was washed with water and brine, dried over Na<sub>2</sub>SO<sub>4</sub> and concentrated *in vacuo*. The residue was purified by flash column chromatography (10 g, Hexane → Hexane/EtOAc = 9/1 → Hexane/EtOAc = 4/1), which gave the title compound **3** as yellow oil (206.0 mg, 54%). R<sub>f</sub> = 0.37 (Hexane/EtOAc = 2/1, v/v); [α]<sub>D</sub><sup>20</sup> = +37.1 (*c* 0.7, CHCl<sub>3</sub>); <sup>1</sup>H NMR (400 MHz, CDCl<sub>3</sub>, TMS) δ 7.39-7.26 (m, 5H, Ar-H), 5.87 (dddd, *J*<sub>β,γ<sup>trans</sup></sub> = 14.8 Hz, *J*<sub>β,γ<sup>cis</sup></sub> = 9.6 Hz, *J*<sub>β,α1</sub> = 4.8 Hz, *J*<sub>β,α2</sub> = 6.0 Hz, 1H, H-β), 5.28 (d, *J*<sub>β,γ<sup>trans</sup></sub> = 14.8 Hz, 1H, H-γ<sup>trans</sup>), 5.25 (d, *J*<sub>β,γ<sup>cis</sup></sub> = 9.6 Hz, 1H, H-γ<sup>cis</sup>), 5.19 (d, *J*<sub>1,2</sub> = 3.2 Hz, 1H, H-1), 4.78 (ddd, *J*<sub>2,1</sub> = 3.2 Hz, *J*<sub>2,3</sub> = 1.2 Hz, *J*<sub>2,4</sub> = 2.4 Hz, 1H, H-2), 4.64 & 4.59 (ABq, *J* = 11.6 Hz, 2H, PhCH<sub>2</sub>), 4.37 (dd, *J*<sub>4,2</sub> = 2.4 Hz, *J*<sub>4,5</sub> = 0.8 Hz, 1H, H-4), 4.34 & 4.31 (dd, *J*<sub>α1,α2</sub> = 12.6 Hz, *J*<sub>α1,β</sub> = 4.8 Hz, 1H, H-α1), 4.13 & 4.10 (dd, *J*<sub>α1,α2</sub> = 12.6 Hz, *J*<sub>α2,β</sub> = 6.0 Hz, 1H, H-α2), 4.02 (d, *J*<sub>3,2</sub> = 1.2 Hz, 1H, H-3), 3.97 (d, *J*<sub>5,4</sub> = 0.8 Hz, 1H, H-5), 3.00 (br, 1H, -OH); <sup>13</sup>C NMR (100 MHz, CDCl<sub>3</sub>, TMS) δ 168.5, 136.9, 132.8, 128.6, 128.2, 127.9, 119.0, 95.6, 75.8, 74.9, 74.1, 72.4, 70.8, 70.5; HRMS (ESI) Calcd for C<sub>16</sub>H<sub>18</sub>O<sub>6</sub>Na [M+Na]<sup>+</sup>: 329.1001, found: 329.1010.

### Allyl 3,4-di-*O*-benzyl- $\alpha$ -D-mannopyranurono-2,6-lactone (**4a**)

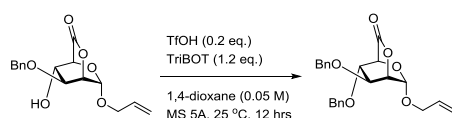

Under Ar atmosphere, to **3** (21.9 mg, 71.5 μmol), TriBOT (11.4 mg, 28.6 μmol) and activated 5 Å molecular sieves (150



mg) was added anhydrous 1,4-dioxane (1.43 ml) at room temperature. After stirring for 30 min, TfOH (1.3  $\mu$ l, 14.3  $\mu$ mol) was added at room temperature, and the mixture was stirred for 12 hrs. The reaction was quenched by Et<sub>3</sub>N, the mixture was filtrated through Celite pad and concentrated *in vacuo*. The residue was purified by open column chromatography (7 g, Hexane/EtOAc = 4/1), which gave the title compound **4a** (21.4 mg, 75%) as colorless oil.  $R_f$  = 0.57 (Hexane/EtOAc = 4/1, v/v);  $[\alpha]^{20}_D$  = +28.2 (*c* 0.2, CHCl<sub>3</sub>); <sup>1</sup>H NMR (400 MHz, CDCl<sub>3</sub>, TMS)  $\delta$  7.34-7.31 (m, 10H, Ar-H), 5.89 (dddd,  $J_{\beta,\gamma trans}$  = 17.2 Hz,  $J_{\beta,\gamma cis}$  = 10.4 Hz,  $J_{\beta,\alpha 2}$  = 6.4 Hz,  $J_{\beta,\alpha 1}$  = 4.8 Hz, 1H, H $\beta$ ), 5.29 (d,  $J_{\beta,\gamma trans}$  = 17.2 Hz, 1H, H- $\gamma_{trans}$ ), 5.22 (d,  $J_{\beta,\gamma cis}$  = 10.4 Hz, 1H, H- $\gamma_{cis}$ ), 5.20-5.19 (m, 1H, H-1), 4.76 (s, 1H, H-2), 4.63 & 4.49 (ABq,  $J$  = 12.0 Hz, 2H, PhCH<sub>2</sub>), 4.58 & 4.52 (ABq,  $J$  = 12.0 Hz, 2H, PhCH<sub>2</sub>), 4.50 (s, 1H, H-5), 4.37 & 4.34 (dd,  $J_{\alpha 1,\alpha 2}$  = 12.4 Hz,  $J_{\alpha 1,\beta}$  = 4.8 Hz, 1H, H- $\alpha 1$ ), 4.24 (s, 1H, H-4), 4.12 & 4.08 (dd,  $J_{\alpha 2,\alpha 1}$  = 12.4 Hz,  $J_{\alpha 2,\beta}$  = 6.4 Hz, 1H, H- $\alpha 2$ ), 3.77 (s, 1H, H-3); <sup>13</sup>C NMR (100 MHz, CDCl<sub>3</sub>, TMS)  $\delta$  168.4, 137.1, 133.4, 128.6, 128.2, 128.2, 128.0, 127.9, 118.2, 95.7, 79.6, 75.5, 74.7, 71.2, 71.1, 69.8; HRMS (ESI) Calcd for C<sub>23</sub>H<sub>24</sub>NaO<sub>6</sub> [M+Na]<sup>+</sup>: 419.1471, found: 419.1465.

### Allyl 3-*O*-benzyl-4-*O*-*tert*-butyldimethylsilyl- $\alpha$ -D-mannopyranurono-2,6-lactone (**4b**)

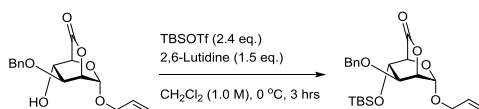

Under Ar atmosphere, to a solution of **3** (0.52 g, 1.7 mmol) and 2,6-lutidine (0.30 ml, 2.6 mmol) in anhydrous CH<sub>2</sub>Cl<sub>2</sub> (1.7 ml) was added TBSOTf (0.94 ml, 4.0 mmol) at 0 °C and the mixture was stirred for 3 hrs. The mixture was poured into sat. NaHCO<sub>3</sub> aq. and extracted with CH<sub>2</sub>Cl<sub>2</sub>. The combined organic layer was washed with water and brine, dried over Na<sub>2</sub>SO<sub>4</sub> and concentrated *in vacuo*. The residue was purified by flash column chromatography (10 g, Hexane → Hexane/EtOAc = 19/1), which gave the title compound **4b** as yellow oil (0.40 g, 95%).  $R_f$  = 0.67 (Hexane/EtOAc = 4/1, v/v);  $[\alpha]^{20}_D$  = +15.5 (*c* 0.3, CHCl<sub>3</sub>); <sup>1</sup>H NMR (400 MHz, CDCl<sub>3</sub>, TMS)  $\delta$  7.40-7.27 (5H, m), 5.89 (dddd,  $J_{\beta,\gamma trans}$  = 17.2 Hz,  $J_{\beta,\gamma cis}$  = 14.8 Hz,  $J_{\beta,\alpha 1}$  = 4.8 Hz,  $J_{\beta,\alpha 2}$  = 6.4 Hz, 1H, H- $\beta$ ), 5.12 (d,  $J_{\gamma trans,\beta}$  = 17.2 Hz, 1H, H- $\gamma_{trans}$ ), 5.24 (d,  $J_{\beta,\gamma cis}$  = 14.8 Hz, 1H, H- $\gamma_{cis}$ ), 5.08 (s, 1H, H-1), 4.70 (s, 1H, H-2), 4.62 & 4.57 (ABq,  $J$  = 11.2 Hz, 2H, PhCH<sub>2</sub>), 4.34 & 4.31 (dd,  $J_{\alpha 1,\alpha 2}$  = 12.6 Hz,  $J_{\alpha 1,\beta}$  = 4.8 Hz, 1H, H- $\alpha 1$ ), 4.16 (s, 1H, H-4), 4.02 (s, 1H, H-3), 4.08 & 4.05 (dd,  $J_{\alpha 1,\alpha 2}$  = 12.6 Hz,  $J_{\alpha 2,\beta}$  = 6.4 Hz, 1H, H- $\alpha 2$ ), 3.93 (s, 1H, H-5), 0.91 (s, 9H, C(CH<sub>3</sub>)<sub>3</sub>), 0.11 (s, 6H, Si(CH<sub>3</sub>)<sub>2</sub>); <sup>13</sup>C NMR (100 MHz, CDCl<sub>3</sub>, TMS)  $\delta$  168.9, 137.2, 133.45, 128.6, 128.1, 127.9, 117.9, 95.4, 75.0, 74.9, 74.3, 71.2, 69.2, 25.7, 18.0, -4.6, -4.8; HRMS (ESI) Calcd for C<sub>22</sub>H<sub>32</sub>O<sub>6</sub>SiNa [M+Na]<sup>+</sup>: 443.1866, found: 443.1873.

### 3,4-Di-*O*-benzyl-D-mannopyranurono-2,6-lactone (**S1**)

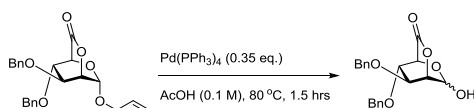

Under Ar atmosphere, to a solution of allyl glycoside **4a** (407.5 mg, 1.03 mmol) in AcOH (10.3 ml) was added Pd(PPh<sub>3</sub>)<sub>4</sub> (416.6 mg, 360.0  $\mu$ mol) at room temperature. The mixture was degassed, and then warmed up to 80 °C. The mixture was stirred for 1.5 hrs. The mixture was filtrated through Celite pad and concentrated *in vacuo*. The residue was purified by column chromatography (15 g, Hexane/EtOAc = 1/1), which gave the title compound **S1** (346.6 mg, 95%, mixture of  $\alpha$ - and  $\beta$ -anomers) as yellow oil.  $R_f$  = 0.51 (Hexane/EtOAc = 1/1, v/v); <sup>1</sup>H NMR (400 MHz, CDCl<sub>3</sub>, TMS)  $\delta$  7.34-7.30 (m, 20H, Ar-H), 5.40-5.39 (m, 0.3H), 5.18 (s, 0.7H), 4.76-4.73 (m, 1H), 4.63-4.62 (m, 5H), 4.19 (s, 0.4H), 3.77-3.76 (m, 1H), 3.64 (s, 0.6H); <sup>13</sup>C NMR (100 MHz, CDCl<sub>3</sub>, TMS)  $\delta$  168.8, 136.6, 136.6, 128.8, 128.7, 128.7, 128.7, 128.5, 128.4, 128.4, 128.3, 128.3, 128.3, 128.2, 128.1, 128.0, 91.3, 90.4, 79.1, 77.8, 77.4, 75.6, 73.8, 71.5, 71.5, 71.4, 71.1, 71.0, 70.9; HRMS (ESI) Calcd for C<sub>20</sub>H<sub>20</sub>NaO<sub>6</sub> [M+Na]<sup>+</sup>: 379.1158, found: 379.1141.

### 3,4-Di-*O*-benzyl- $\alpha$ -D-mannopyranurono-2,6-lacton-1-yl diethyl phosphite (**5a $\alpha$** )

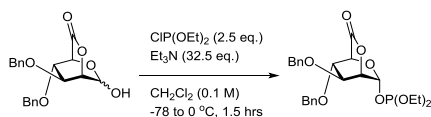

Under Ar atmosphere, to a solution of hemiacetal **S1** (109.0 mg, 0.31 mmol) and Et<sub>3</sub>N (0.32 ml, 2.29 mmol) in anhydrous CH<sub>2</sub>Cl<sub>2</sub> (3.06 ml) was added diethyl chlorophosphite (0.11 ml, 0.76 mmol) at -78 °C and the mixture was gradually warmed up to 0 °C, and stirred for 2 hrs. Et<sub>3</sub>N (1.06 ml, 7.65 mmol) was added at 0 °C, and the mixture was extracted with ice-cooled CH<sub>2</sub>Cl<sub>2</sub>. The organic layer was washed with cold sat. NaHCO<sub>3</sub> aq. and brine, dried over Na<sub>2</sub>SO<sub>4</sub> and concentrated *in vacuo*. The residue was purified by flash column chromatography (10 g, Hexane/EtOAc = 9/1 → Hexane/EtOAc = 4/1 + 5% Et<sub>3</sub>N), which gave the  $\alpha$ -anomer **5a $\alpha$**  as colorless syrup (29.0 mg, 20%). *R*<sub>f</sub> = 0.45 (Hexane/EtOAc = 4/1, v/v); [ $\alpha$ ]<sup>20</sup><sub>D</sub> = -46.0 (*c* 0.2, CHCl<sub>3</sub>); <sup>1</sup>H NMR (400 MHz, CDCl<sub>3</sub>, TMS)  $\delta$  7.36-7.29 (m, 10H, Ar-H), 5.61-5.59 (m, 1H, H-1), 4.75 (s, 1H, H-2), 4.64 & 4.48 (ABq, *J* = 11.8 Hz, 2H, PhCH<sub>2</sub>), 4.59 & 4.52 (ABq, *J* = 11.8 Hz, 2H, PhCH<sub>2</sub>), 4.54 (s, 1H, H-5), 3.95-3.86 (m, 4H, CH<sub>2</sub> × 2), 3.80 (s, 1H, H-4), 3.71 (s, 1H, H-3), 1.28-1.24 (m, 6H, CH<sub>3</sub>); <sup>13</sup>C NMR (100 MHz, CDCl<sub>3</sub>, TMS)  $\delta$  168.1, 136.6, 136.6, 128.7, 128.7, 128.4, 128.3, 128.2, 128.0, 89.8, 89.7, 79.3, 77.6, 71.4, 71.1, 71.1, 59.1, 59.0, 58.9, 16.9, 16.9, 16.8, 16.8; HRMS (ESI) Calcd for C<sub>24</sub>H<sub>29</sub>NaO<sub>8</sub>P [M+Na]<sup>+</sup>: 499.1498, found: 499.1485.

### 3,4-Di-*O*-benzyl- $\alpha$ -D-mannopyranurono-2,6-lacton-1-yl iodide (**5b $\alpha$** )

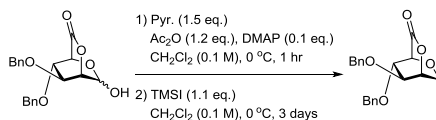

Under Ar atmosphere, to a solution of hemiacetal **S1** (61.0 mg, 171.2  $\mu$ mol), Pyr. (20.7  $\mu$ l, 256.8  $\mu$ mol) and Ac<sub>2</sub>O (19.4  $\mu$ l, 205.4  $\mu$ mol) in anhydrous CH<sub>2</sub>Cl<sub>2</sub> (1.71 ml) was added DMAP (2.1 mg, 17.1  $\mu$ mol) at 0 °C. The mixture was stirred for 1 hr. The reaction was quenched by water. The mixture was extracted with CH<sub>2</sub>Cl<sub>2</sub>, and the organic layer was washed with water, 1 M KHSO<sub>4</sub> aq. and brine, dried over Na<sub>2</sub>SO<sub>4</sub> and concentrated *in vacuo*. Under Ar atmosphere, to a solution of the residue (66.9 mg) in anhydrous CH<sub>2</sub>Cl<sub>2</sub> (1.71 ml) was added TMSI (26.7  $\mu$ l, 188.3  $\mu$ mol) at 0 °C and the mixture was stirred for 3 days. The mixture was co-evaporated with toluene for 3 times. The mixture was purified by open column chromatography (7 g, Hexane/EtOAc = 4/1), which gave the pure  $\alpha$ -anomer **5b $\alpha$**  as brown syrup (18.4 mg, 23% in 2 steps) and anomeric mixture **5b $\alpha\beta$**  as brown syrup (5.6 mg, 7% in 2 steps). For **5b $\alpha$** : *R*<sub>f</sub> = 0.43 (Hexane/EtOAc = 4/1, v/v); [ $\alpha$ ]<sup>20</sup><sub>D</sub> = -149.5 (*c* 0.8, CHCl<sub>3</sub>); <sup>1</sup>H NMR (400 MHz, CDCl<sub>3</sub>, TMS)  $\delta$  7.38-7.29 (m, 10H, Ar-H), 6.68 (s, 1H, H-1), 4.90 (s, 1H, H-2), 4.59 & 4.50 (ABq, *J* = 12.0 Hz, 2H, PhCH<sub>2</sub>), 4.59 & 4.46 (ABq, *J* = 12.0 Hz, 2H, PhCH<sub>2</sub>), 4.46 (s, 1H, H-5), 3.86 (s, 1H, H-4), 3.78 (s, 1H, H-3); <sup>13</sup>C NMR (100 MHz, CDCl<sub>3</sub>, TMS)  $\delta$  165.5, 136.3, 136.3, 128.8, 128.8, 128.6, 128.5, 128.2, 128.1, 80.2, 80.1, 71.6, 71.3, 71.2, 58.2; HRMS (ESI) Calcd for C<sub>20</sub>H<sub>19</sub>INaO<sub>5</sub> [M+Na]<sup>+</sup>: 489.0175, found: 489.0157. For **5b $\alpha\beta$** : <sup>1</sup>H NMR (400 MHz, CDCl<sub>3</sub>, TMS)  $\delta$  7.36-7.29 (m, 10H, Ar-H), 6.68-6.53 (m, 1H, H-1), 5.29 & 4.90 (m, 1H, H-2), 4.64-4.44 (m, 5H, H-5, Ph<sub>2</sub>CH<sub>2</sub> × 2), 4.40 & 3.86 (s, 1H, H-4), 3.80-3.77 (s, 1H, H-3)

### 3,4-Di-*O*-benzyl-D-mannopyranurono-2,6-lactone-1-yl trichloroacetimidate (**5c**)

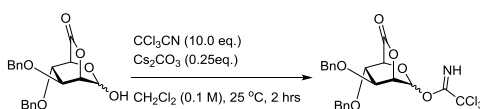

Under Ar atmosphere, to a solution of hemiacetal **S1** (98.4 mg, 196.0  $\mu$ mol) and CCl<sub>3</sub>CN (0.20 ml, 1.96 mmol) in anhydrous CH<sub>2</sub>Cl<sub>2</sub> (1.96 ml) was added Cs<sub>2</sub>CO<sub>3</sub> (17.3 mg, 49.1  $\mu$ mol) at room temperature. After the TLC analysis showed the completion of reaction, the reaction mixture was filtrated through Celite pad and concentrated *in vacuo*. The residue was

purified by open column chromatography (7 g, Petroleum ether/ $\text{CHCl}_3$  = 1/19), which gave the title compound **5c $\alpha$**  (31.2 mg, 32%) and **5c $\beta$**  (20.8 mg, 19%) in 2 steps as colorless oil, each. For **5c $\alpha$** : Colorless oil,  $R_f$  = 0.29 (Petroleum ether/ $\text{CHCl}_3$  = 1/9, v/v);  $[\alpha]_D^{20}$  = +25.6 ( $c$  0.2,  $\text{CHCl}_3$ );  $^1\text{H}$  NMR (400 MHz,  $\text{CDCl}_3$ , TMS)  $\delta$  8.70 (s, 1H, NH), 7.36-7.28 (m, 10H, Ar-H), 6.39 (d,  $J_{1,2}$  = 3.3 Hz, 1H, H-1), 5.00 (ddd,  $J_{2,1}$  = 3.3 Hz,  $J_{2,3}$  = 1.0 Hz,  $J_{2,4}$  = 1.9 Hz, 1H, H-2), 4.65 (dd,  $J_{5,3}$  = 1.9 Hz,  $J_{5,4}$  = 0.8 Hz, 1H, H-5), 4.62 & 4.47 (ABq,  $J$  = 12.0 Hz, 2H,  $\text{PhCH}_2$ ), 4.56 & 4.56 (ABq,  $J$  = 11.6 Hz, 2H,  $\text{PhCH}_2$ ), 4.23 (dd,  $J_{4,2}$  = 1.9 Hz,  $J_{4,3}$  = 1.6 Hz, 1H, H-4), 3.84 (dd,  $J_{3,4}$  = 4.6 Hz,  $J_{3,5}$  = 1.9 Hz, 1H, H-3);  $^{13}\text{C}$  NMR (100 MHz,  $\text{CDCl}_3$ , TMS)  $\delta$  167.4, 160.4, 136.7, 136.5, 128.7, 128.6, 128.6, 128.5, 128.4, 128.2, 128.0, 92.8, 78.9, 73.5, 73.4, 72.5, 71.2, 71.1; HRMS (ESI) Calcd for  $\text{C}_{22}\text{H}_{20}\text{Cl}_3\text{NO}_6\text{Na}$   $[\text{M}+\text{Na}]^+$ : 522.0254, found: 522.0226. For **5c $\beta$** : Colorless oil,  $R_f$  = 0.52 (Petroleum ether/ $\text{CHCl}_3$  = 1/9, v/v);  $[\alpha]_D^{20}$  = -15.2 ( $c$  0.3,  $\text{CHCl}_3$ );  $^1\text{H}$  NMR (400 MHz,  $\text{CDCl}_3$ , TMS)  $\delta$  8.67 (s, 1H, NH), 7.37-7.30 (m, 10H, Ar-H), 6.30 (s, 1H, H-1), 5.10 (s, 1H, H-2), 4.66 & 4.49 (ABq,  $J$  = 11.4 Hz, 2H,  $\text{PhCH}_2$ ), 4.65 (s, 1H, H-5), 4.62 & 4.54 (ABq,  $J$  = 12.0 Hz, 2H,  $\text{PhCH}_2$ ), 3.85 (s, 1H, H-4), 3.80 (s, 1H, H-3);  $^{13}\text{C}$  NMR (100 MHz,  $\text{CDCl}_3$ , TMS)  $\delta$  167.2, 160.8, 136.4, 136.4, 128.8, 128.8, 128.7, 128.5, 128.4, 128.3, 128.2, 128.0, 93.5, 79.2, 77.2, 75.1, 71.7, 71.5, 71.2; HRMS (ESI) Calcd for  $\text{C}_{22}\text{H}_{20}\text{Cl}_3\text{NO}_6\text{Na}$   $[\text{M}+\text{Na}]^+$ : 522.0254, found: 522.0262. The NOE correlation observed between  $\delta$  6.30 and  $\delta$  3.80 confirmed the stereochemistry at C-1 to be  $\beta$ .

### 3-*O*-Benzyl-4-*O*-*tert*-butyldimethylsilyl-D-mannopyranurono-2,6-lactone-1-yl trichloroacetimidate (**5d**)

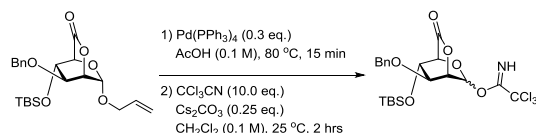

Under Ar atmosphere, to a solution of **4b** (54.3 mg, 129.1  $\mu\text{mol}$ ) in AcOH (1.29 ml) was added  $\text{Pd}(\text{PPh}_3)_4$  (44.8 mg, 38.7  $\mu\text{mol}$ ) at room temperature. The mixture was degassed, and then warmed to 80  $^\circ\text{C}$ . The mixture was stirred for 15 min. The mixture was filtrated through Celite pad and concentrated *in vacuo*. Under Ar atmosphere, to a solution of the crude product and  $\text{CCl}_3\text{CN}$  (0.13 ml, 1.29 mmol) in anhydrous  $\text{CH}_2\text{Cl}_2$  (1.29 ml) was added  $\text{Cs}_2\text{CO}_3$  (11.4 mg, 32.3  $\mu\text{mol}$ ) at room temperature. After the TLC analysis showed the completion of reaction, the reaction was filtrated through Celite pad and concentrated *in vacuo*. The residue was purified by open column chromatography (7 g, Hexane/ $\text{CH}_2\text{Cl}_2$  = 3/7), which gave the title compound **5d $\alpha$**  (9.3 mg, 14% in 2 steps), **5d $\beta$**  (17.8 mg, 26% in 2 steps). For **5d $\alpha$** : Colorless oil,  $R_f$  = 0.33 (Hexane/ $\text{CH}_2\text{Cl}_2$  = 3/7, v/v);  $[\alpha]_D^{20}$  = +54.5 ( $c$  0.1,  $\text{CHCl}_3$ );  $^1\text{H}$  NMR (400 MHz,  $\text{CDCl}_3$ , TMS)  $\delta$  8.67 (s, 1H, NH), 7.35-7.31 (m, 5H, Ar-H), 6.36 (m, 1H, H-1), 4.97 (s, 1H, H-2), 4.65 & 4.60 (ABq,  $J$  = 12.0 Hz, 2H,  $\text{PhCH}_2$ ), 4.36 (s, 1H, H-5), 4.08 (s, 1H, H-4), 4.08 (s, 1H, H-3), 0.87 (s, 9H,  $\text{C}(\text{CH}_3)_3$ ), 0.10 (s, 3H,  $-\text{CH}_3$ ), 0.09 (s, 3H,  $-\text{CH}_3$ );  $^{13}\text{C}$  NMR (100 MHz,  $\text{CDCl}_3$ , TMS)  $\delta$  167.7, 160.6, 136.5, 128.7, 128.4, 128.3, 93.2, 76.1, 75.9, 74.2, 73.2, 71.3, 25.7, 18.0, -4.7, -4.8; HRMS (ESI) Calcd for  $\text{C}_{21}\text{H}_{28}\text{Cl}_3\text{NO}_6\text{SiNa}$   $[\text{M}+\text{Na}]^+$ : 546.0649, found: 546.0636. For **5d $\beta$** : Colorless oil,  $R_f$  = 0.59 (Hexane/ $\text{CH}_2\text{Cl}_2$  = 3/7, v/v);  $[\alpha]_D^{20}$  = -11.6 ( $c$  0.6,  $\text{CHCl}_3$ );  $^1\text{H}$  NMR (400 MHz,  $\text{CDCl}_3$ , TMS)  $\delta$  8.66 (s, 1H, NH), 7.37-7.33 (m, 5H, Ar-H), 6.29 (s, 1H, H-1), 5.12 (s, 1H, H-2), 4.65 & 4.60 (ABq,  $J$  = 12.0 Hz, 2H,  $\text{PhCH}_2$ ), 4.36 (s, 1H, H-5), 4.07 (s, 1H, H-4), 3.67 (s, 1H, H-3), 0.90 (s, 9H,  $\text{C}(\text{CH}_3)_3$ ), 0.13 (s, 6H,  $\text{Si}(\text{CH}_3)_2$ );  $^{13}\text{C}$  NMR (100 MHz,  $\text{CDCl}_3$ , TMS)  $\delta$  167.6, 160.8, 136.4, 128.7, 128.4, 128.0, 93.7, 79.7, 75.6, 74.4, 74.3, 71.4, 25.7, 18.0, -4.58, -4.79; HRMS (ESI) Calcd for  $\text{C}_{21}\text{H}_{28}\text{Cl}_3\text{NO}_6\text{SiNa}$   $[\text{M}+\text{Na}]^+$ : 546.0649, found: 546.0651. The NOE correlation observed between  $\delta$  6.29 and  $\delta$  3.67 confirmed the stereochemistry at C-1 to be  $\beta$ .

## Table 1

### Entry 1

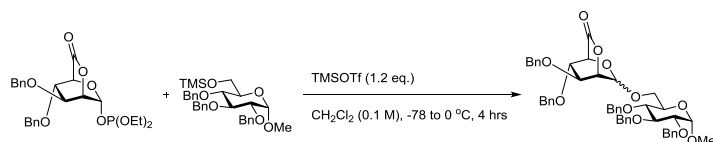

Under Ar atmosphere, to a glycosyl phosphite **5aα** (16.7 mg, 35.1 μmol) and trimethylsilylated acceptor **6a'**<sup>[3]</sup> (22.6 mg, 42.1 μmol) was added anhydrous CH<sub>2</sub>Cl<sub>2</sub> (0.35 ml) at room temperature. After stirring for 30 min, TMSOTf (7.6 μl, 42.1 μmol) were added at -78 °C, and the mixture was stirred and warmed up to 0 °C over 4 hrs. The reaction was quenched by Et<sub>3</sub>N at 0 °C and the mixture was concentrated *in vacuo*. The residue was purified by flash column chromatography (10 g, Hexane/EtOAc = 9/1 → Hexane/EtOAc = 17/3 → Hexane/EtOAc = 4/1). The ratio of α- and β-anomers was determined by NMR (25.5 mg, 52%, α:β = 1:9).

## Entry 2

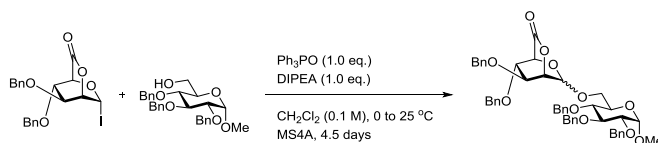

Under Ar atmosphere, to a glycosyl iodide **5ba** (16.0 mg, 36.7 μmol), glycosyl acceptor **6a**<sup>[4]</sup> (18.7 mg, 40.4 μmol) and activated 4 Å molecular sieves (30 mg) was added anhydrous CH<sub>2</sub>Cl<sub>2</sub> (0.37 ml) at room temperature. After stirring for 30 min, Ph<sub>3</sub>PO (10.2 mg, 36.7 μmol) and DIPEA (6.4 μl, 36.7 μmol) were added at 0 °C, and the mixture was stirred for 4.5 days. The reaction was diluted with 10 mL of CH<sub>2</sub>Cl<sub>2</sub>. The mixture was filtrated through Celite pad and the mixture concentrated *in vacuo*. The residue was purified by flash column chromatography (10 g, Hexane only → Hexane/EtOAc = 9/1 → Hexane/EtOAc = 17/3 → Hexane/EtOAc = 4/1), which gave the β-anomer (10.1 mg, 37%, β-only), and the α-anomer was not detected by <sup>1</sup>H NMR.

## Entry 3

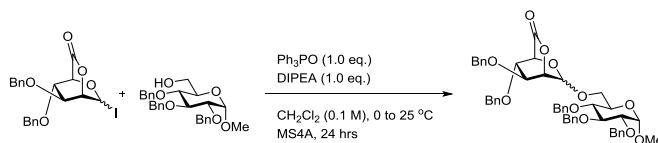

Under Ar atmosphere, to glycosyl iodide **5baβ** (9.8 mg, 21.0 μmol, α:β = 2:1), glycosyl acceptor **6a** (10.7 mg, 23.1 μmol) and activated 4 Å molecular sieves (20 mg) was added anhydrous CH<sub>2</sub>Cl<sub>2</sub> (0.21 ml) at room temperature. After stirring for 30 min, Ph<sub>3</sub>PO (5.8 mg, 21.0 μmol) and DIPEA (3.7 μl, 21.0 μmol) were added at 0 °C. The mixture was stirred for 4.5 days. The reaction was diluted with 10 mL of CH<sub>2</sub>Cl<sub>2</sub>. The mixture was filtrated through Celite and concentrated *in vacuo*. The residue was purified by open column chromatography (7 g, Hexane/EtOAc = 7/3). The ratio of the α- and β-anomers was analyzed by <sup>1</sup>H NMR (3.0 mg, 37%, α:β = 1:2.3).

## Entry 4, 5

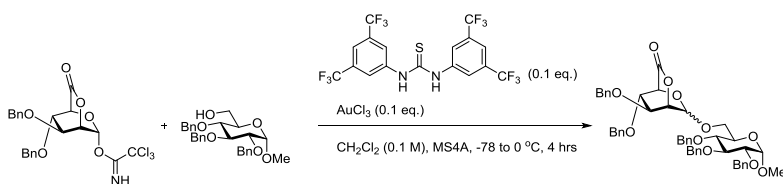

Under Ar atmosphere, to glycosyl imide **5cα** or **5cβ**, glycosyl acceptor **6a** (1.2 equiv. to **5c**) and activated 4 Å molecular sieves was added anhydrous CH<sub>2</sub>Cl<sub>2</sub> (0.1 M to **5c**) at room temperature. After stirring for 30 min, gold (III) chloride and 1,3-bis[3,5-bis(trifluoromethyl)phenyl] thiourea were added at -78 °C. The mixture was stirred and warmed up to 0 °C over 4 hrs. The reaction was quenched by Et<sub>3</sub>N at 0 °C and diluted with 10 mL of CH<sub>2</sub>Cl<sub>2</sub>. The mixture was filtrated through

Celite pad and concentrated *in vacuo*. The ratio of the  $\alpha$ - and  $\beta$ -anomers was analyzed by HPLC (column, Mightysil, RP-18 MS 150-4.6 (5  $\mu$ m); eluent, CH<sub>3</sub>CN/H<sub>2</sub>O = 80/20; flow rate, 1.0 ml/min;  $t_R$   $\alpha$ -mannoside 13.400 min;  $t_R$   $\beta$ -mannoside 12.258 min).

**Methyl 2,3,4-tri-*O*-benzyl-6-*O*-(3',4'-di-*O*-benzyl- $\beta$ -D-mannopyranurono-2',6'-lacton-1'-yl)- $\alpha$ -D-glucopyranoside (7a $\beta$ )**

Colorless oil,  $R_f$  = 0.49 (Hexane/EtOAc = 2:1, v/v);  $[\alpha]^{20}_D$  = +78.7 (*c* 0.3, CHCl<sub>3</sub>); <sup>1</sup>H NMR (400 MHz, CDCl<sub>3</sub>, TMS)  $\delta$  7.34-7.27 (m, 25H, Ar-H), 4.98 & 4.46 (ABq,  $J$  = 11.2 Hz, 2H, PhCH<sub>2</sub>), 4.85 & 4.48 (ABq,  $J$  = 11.4 Hz, 2H, PhCH<sub>2</sub>), 4.78 & 4.62 (ABq,  $J$  = 10.8 Hz, 2H, PhCH<sub>2</sub>), 4.77 & 4.53 (ABq,  $J$  = 12.4 Hz, 2H, PhCH<sub>2</sub>), 4.76 (s, 1H, H-1'), 4.64 & 4.54 (ABq,  $J$  = 11.6 Hz, 2H, PhCH<sub>2</sub>), 4.62 (s, 1H, H-2'), 4.55 (d,  $J_{1,2}$  = 3.6 Hz, 1H, H-1), 4.45 (s, 1H, H-5'), 4.01-3.96 (m, 1H, H-6), 3.98 (dd,  $J_{3,2}$  = 9.6 Hz,  $J_{3,4}$  = 9.6 Hz, 1H, H-3), 3.79-3.71 (m, 1H, H-5), 3.76 (s, 1H, H'-4), 3.59-3.54 (m, 1H, H-6), 3.55 (s, 1H, H'-3), 3.51 & 3.48 (dd,  $J_{2,3}$  = 9.6 Hz,  $J_{2,1}$  = 3.6 Hz, 1H, H-2), 3.40 (d,  $J_{4,3}$  = 9.6 Hz, 0.5H, H-4), 3.38-3.36 (m, 0.5H, H-4), 3.33 (s, 3H, -OCH<sub>3</sub>); <sup>13</sup>C NMR (100 MHz, CDCl<sub>3</sub>, TMS)  $\delta$  168.2, 138.8, 138.4, 138.2, 136.7, 136.6, 128.7, 128.7, 128.5, 128.5, 128.5, 128.4, 128.3, 128.2, 128.2, 128.0, 128.0, 127.9, 127.8, 127.7, 97.9, 95.7, 82.1, 80.1, 79.6, 77.7, 77.6, 77.3, 76.5, 75.8, 74.8, 73.5, 71.4, 70.9, 70.9, 69.8, 67.2, 55.2; HRMS (ESI) Calcd for C<sub>48</sub>H<sub>50</sub>O<sub>11</sub>Na [M+Na]<sup>+</sup>: 825.3251, found: 825.3225. The NOE correlation observed between  $\delta$  4.76 and  $\delta$  3.55 confirmed the stereochemistry at C-1 to be  $\beta$ .

**Methyl 2,3,4-tri-*O*-benzyl-6-*O*-(3',4'-di-*O*-benzyl- $\alpha$ -D-mannopyranurono-2',6'-lacton-1'-yl)- $\alpha$ -D-glucopyranoside (7a $\alpha$ )**

$\alpha$ -anomer: Colorless oil,  $R_f$  = 0.43 (Hexane/EtOAc = 2:1, v/v);  $[\alpha]^{20}_D$  = +4.1 (*c* 0.2, CHCl<sub>3</sub>); <sup>1</sup>H NMR (400 MHz, CDCl<sub>3</sub>, TMS)  $\delta$  7.39-7.13 (m, 25H, Ar-H), 5.22-5.21 (m, 1H, H-1'), 4.98 & 4.83 (ABq,  $J$  = 10.4 Hz, 2H, PhCH<sub>2</sub>), 4.81 & 4.70 (ABq,  $J$  = 12.4 Hz, 2H, PhCH<sub>2</sub>), 4.80 (s, 1H, H-2'), 4.67 (s, 2H, PhCH<sub>2</sub>), 4.62 (d,  $J_{1,2}$  = 3.6 Hz, 1H, H-1), 4.54 & 4.43 (ABq,  $J$  = 11.8 Hz, 2H, PhCH<sub>2</sub>), 4.46 (s, 1H, H-5'), 4.40 & 4.32 (ABq,  $J$  = 12.0 Hz, 2H, PhCH<sub>2</sub>), 4.27-4.23 (m, 1H, H-6), 4.18 (s, 1H, H-3'), 3.96 (dd,  $J_{3,2}$  = 9.2 Hz,  $J_{3,4}$  = 9.2 Hz, 1H, H-3), 3.72-3.68 (m, 3H, H-4', H-5, H-6), 3.54-3.52 (m, 0.5H, H-4), 3.51 (d,  $J_{4,3}$  = 9.2 Hz, 0.5H, H-4), 3.49 (dd,  $J_{2,3}$  = 9.2 Hz,  $J_{2,1}$  = 3.6 Hz, 1H, H-2), 3.33 (s, 3H, -OCH<sub>3</sub>); <sup>13</sup>C NMR (100 MHz, CDCl<sub>3</sub>, TMS)  $\delta$  168.2, 138.8, 138.4, 138.2, 136.8, 136.6, 128.6, 128.6, 128.5, 128.5, 128.2, 128.2, 128.1, 128.1, 127.9, 127.8, 98.3, 97.3, 82.0, 79.9, 79.5, 77.3, 76.0, 75.5, 75.2, 74.1, 73.4, 71.7, 71.2, 70.9, 69.7, 67.7, 55.3; HRMS (ESI) Calcd for C<sub>48</sub>H<sub>50</sub>O<sub>11</sub>Na [M+Na]<sup>+</sup>: 825.3251, found: 825.3239.

## Table 2

Under Ar atmosphere, to a glycosyl imidate **5 $\alpha$**  or **5d $\alpha$** , the glycosyl acceptor listed in Table 2 (1.2 equiv. to **5 $\alpha$**  or **5d $\alpha$** ) and activated 4 Å molecular sieves was added anhydrous CH<sub>2</sub>Cl<sub>2</sub> (0.1 M or 1.5 M to **5 $\alpha$**  or **5d $\alpha$** ) at room temperature. After stirring for 30 min, gold (III) chloride (0.1 equiv.) and 1,3-bis[3,5-bis(trifluoromethyl)phenyl] thiourea (0.1 equiv.) were added at -78 °C, and the mixture was stirred and gradually warmed up to 0 °C. The reaction was quenched by Et<sub>3</sub>N at 0 °C and diluted with 10 mL of CH<sub>2</sub>Cl<sub>2</sub>. The mixture was filtrated through Celite pad and concentrated *in vacuo*. The residue was purified by column chromatography.

### Methyl

**2,3-*O*-isopropylidene-4-*O*-(3',4'-di-*O*-benzyl- $\beta$ -D-mannopyranurono-2',6'-lacton-1'-yl)- $\alpha$ -L-rhamnopyranoside (7b $\beta$ )**

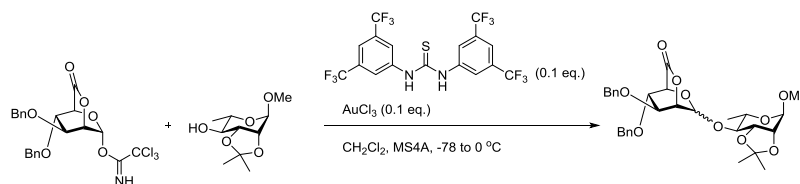

**6b**<sup>[5]</sup> was used as an acceptor. The residue was purified by column chromatography (Hexane/EtOAc = 3/1). The ratio of  $\alpha$ - and  $\beta$ -anomers was analyzed by HPLC (column, Mightysil, RP-18 MS 150-4.6 (5  $\mu$ m); eluent, CH<sub>3</sub>CN/H<sub>2</sub>O = 70/30; flow rate, 1.0 ml/min;  $t_R$   $\alpha$ -mannoside 8.847 min;  $t_R$   $\beta$ -mannoside 9.388 min). For **7bβ**: Colorless oil,  $R_f$  = 0.57 (Hexane/EtOAc = 2:1, v/v);  $[\alpha]^{20}_D$  = -41.7 ( $c$  0.7, CHCl<sub>3</sub>); <sup>1</sup>H NMR (400 MHz, CDCl<sub>3</sub>, TMS)  $\delta$  7.38-7.30 (m, 10H, Ar-H), 5.43-5.42 (m, 1H, H-1'), 4.85 (m, 2H, H-1, H-2'), 4.65 & 4.50 (ABq,  $J$  = 11.6 Hz, 2H, PhCH<sub>2</sub>), 4.60 & 4.53 (ABq,  $J$  = 12.0 Hz, 2H, PhCH<sub>2</sub>), 4.51 (s, 1H, H-5), 4.17 (d,  $J_{3,4}$  = 5.6 Hz, 0.5H, H-3), 4.17-4.15 (m, 0.5H, H-3), 4.10 (d,  $J_{2,3}$  = 5.6 Hz, 1H, H-2), 3.80 (s, 1H, H-4'), 3.70 (s, 1H, H-3'), 3.66-3.56 (m, 2H, H-4, H-5), 3.35 (s, 3H, -OCH<sub>3</sub>), 1.53 (s, 3H, -CH<sub>3</sub>), 1.34 (s, 3H, -CH<sub>3</sub>), 1.23-1.21 (m, 3H, C-5); <sup>13</sup>C NMR (100 MHz, CDCl<sub>3</sub>, TMS)  $\delta$  168.5, 136.8, 136.7, 128.7, 128.7, 128.4, 128.1, 127.9, 109.6, 97.9, 94.7, 79.8, 78.3, 78.2, 77.8, 77.3, 77.0, 76.2, 71.4, 71.1, 70.8, 63.9, 54.9, 28.1, 26.4, 17.4; HRMS (ESI) Calcd for C<sub>34</sub>H<sub>44</sub>O<sub>12</sub>Na [M+Na]<sup>+</sup>: 579.2206, found: 579.2217. The NOE correlation observed between  $\delta$  5.43-5.42 and  $\delta$  3.70 confirmed the stereochemistry at C-1 to be  $\beta$ .

## Allyl

### 2-*O*-(3',4'-di-*O*-benzyl- $\beta$ -D-mannopyranurono-2',6'-lacton-1'-yl)-3-*O*-benzyl-4,6-*O*-benzylidene- $\alpha$ -D-mannopyranoside (7cβ)

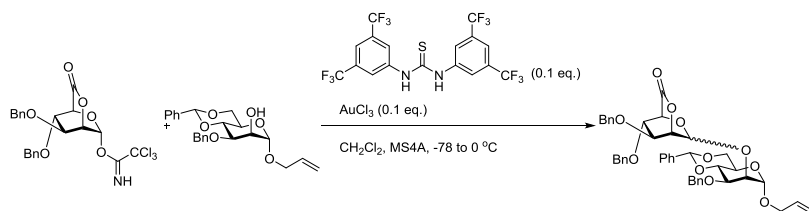

**6c**<sup>[6]</sup> was used as an acceptor. The residue was purified by column chromatography (Hexane/EtOAc = 3/1). The ratio of the  $\alpha$ - and  $\beta$ -mixtures was analyzed by HPLC (column, Mightysil, RP-18 MS 150-4.6 (5  $\mu$ m); eluent, CH<sub>3</sub>CN/H<sub>2</sub>O = 80/20; flow rate, 1.0 ml/min;  $t_R$   $\alpha$ -mannoside 10.200 min;  $t_R$   $\beta$ -mannoside 7.500 min). For **7cβ**: Colorless oil,  $R_f$  = 0.55 (Hexane/EtOAc = 2:1, v/v);  $[\alpha]^{20}_D$  = -14.5 ( $c$  0.4, CHCl<sub>3</sub>); <sup>1</sup>H NMR (400 MHz, CDCl<sub>3</sub>, TMS)  $\delta$  7.52-7.28 (m, 20H, Ar-H), 5.91-5.81 (dddd,  $J_{\beta,\gamma\text{-trans}}$  = 18.8 Hz,  $J_{\beta,\gamma\text{-cis}}$  = 10.4 Hz,  $J_{\beta,\alpha 2}$  = 5.6 Hz,  $J_{\beta,\alpha 1}$  = 4.6 Hz, 1H, CH $\beta$ ), 5.63 (s, 1H, PhCH), 5.26 (d,  $J_{\gamma\text{-trans},\beta}$  = 18.8 Hz, 1H, H- $\gamma_{\text{trans}}$ ), 5.21 (d,  $J_{\gamma\text{-cis},\beta}$  = 10.4 Hz, 1H, H- $\gamma_{\text{cis}}$ ), 5.18 (s, 1H, H-1'), 4.91 (s, 1H, H-2'), 4.86 (s, 1H, H-1), 4.76 & 4.70 (ABq,  $J$  = 12.2 Hz, 2H, PhCH<sub>2</sub>), 4.62 & 4.47 (ABq,  $J$  = 11.8 Hz, 2H, PhCH<sub>2</sub>), 4.55 & 4.45 (ABq,  $J$  = 11.8 Hz, 2H, PhCH<sub>2</sub>), 4.45 (s, 1H, H-5'), 4.27 (s, 1H, H-2), 4.24-4.22 (m, 1H, H-6), 4.16 (dd,  $J_{\alpha 1,\alpha 2}$  = 12.6 Hz,  $J_{\alpha 1,\beta}$  = 4.6 Hz, 1H, H- $\alpha_1$ ), 4.14-4.11 (m, 0.5H, H-4), 4.10 (d,  $J_{4,3}$  = 9.2 Hz, 0.5H, H-4), 3.95 (d,  $J_{3,4}$  = 9.2 Hz, 1H, H-3), 3.94 (dd,  $J_{\alpha 2,\alpha 1}$  = 12.6 Hz,  $J_{\alpha 2,\beta}$  = 5.6 Hz, 1H, H- $\alpha_2$ ), 3.86-3.80 (m, 2H, H-5, H-6), 3.79 (s, 1H, H-4'), 3.63 (s, 1H, H-3'); <sup>13</sup>C NMR (100 MHz, CDCl<sub>3</sub>, TMS)  $\delta$  167.8, 138.7, 137.6, 136.6, 136.5, 133.4, 128.9, 128.7, 128.5, 128.3, 128.2, 128.2, 128.0, 127.6, 127.4, 126.1, 118.1, 101.5, 97.7, 93.8, 79.7, 78.6, 77.8, 77.3, 76.2, 74.4, 72.8, 72.3, 71.5, 71.1, 70.9, 68.8, 68.3, 64.3, 29.8; HRMS (ESI) Calcd for C<sub>43</sub>H<sub>44</sub>O<sub>11</sub>Na [M+Na]<sup>+</sup>: 759.2781, found: 759.2753. The NOE correlation observed between  $\delta$  5.18 and  $\delta$  3.63 confirmed the stereochemistry at C-1 to be  $\beta$ .

## Methyl

### 2-*O*-(3',4'-di-*O*-benzyl- $\beta$ -D-mannopyranurono-2',6'-lacton-1'-yl)-3-*O*-benzyl-4,6-*O*-benzylidene- $\alpha$ -D-glucopyranoside (7dβ)

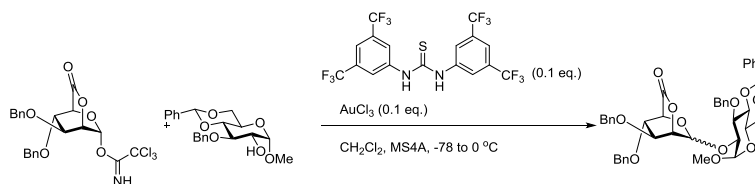

**6d**<sup>[7]</sup> was used as an acceptor. The residue was purified by column chromatography (Hexane/EtOAc = 3/1). The ratio of  $\alpha$ - and  $\beta$ -anomers was analyzed by HPLC (column, Mightysil, RP-18 MS 150-4.6 (5  $\mu$ m); eluent, CH<sub>3</sub>CN/H<sub>2</sub>O = 80/20; flow rate, 1.0 ml/min;  $t_R$   $\alpha$ -mannoside 6.804 min;  $t_R$   $\beta$ -mannoside 6.292 min). For **7dβ**: Colorless oil,  $R_f$  = 0.35 (Hexane/EtOAc = 3:1, v/v);  $[\alpha]^{20}_D$  = -21.5 ( $c$  1.2, CHCl<sub>3</sub>); <sup>1</sup>H NMR (400 MHz, CDCl<sub>3</sub>, TMS)  $\delta$  7.49-7.27 (m, 20H, Ar-H), 5.57 (s, 1H, PhCH), 5.18 (s, 1H, H-1'), 4.95 & 4.63 (ABq,  $J$  = 11.8 Hz, 2H, PhCH<sub>2</sub>), 4.76 (d,  $J_{1,2}$  = 3.6 Hz, 1H, H-1), 4.63 & 4.47 (ABq,  $J$  = 12.0 Hz, 2H, PhCH<sub>2</sub>), 4.59 (s, 1H, H-2'), 4.48 & 4.39 (ABq,  $J$  = 11.8 Hz, 2H, PhCH<sub>2</sub>), 4.45 (s, 1H, H-5'), 4.29 (dd,  $J_{6,6}$  = 10.0 Hz,  $J_{6,5}$  = 4.4 Hz, 1H, H-6), 4.04 (dd,  $J_{2,3}$  = 9.2 Hz,  $J_{3,4}$  = 9.2 Hz, 1H, H-3), 3.86 (ddd,  $J_{5,6}$  = 10.0 Hz,  $J_{5,4}$  = 9.2 Hz,  $J_{5,6}$  = 4.4 Hz, 1H, H-5), 3.78 (dd,  $J_{2,3}$  = 9.2 Hz,  $J_{2,1}$  = 3.6 Hz, 1H, H-2), 3.75 (s, 1H, H-4'), 3.74 (dd,  $J_{6,6}$  = 10.0 Hz,  $J_{6,5}$  = 10.0 Hz, 1H, H-6), 3.60 (dd,  $J_{4,3}$  = 9.2 Hz,  $J_{4,5}$  = 9.2 Hz, 1H, H-4), 3.47 (s, 1H, H-3'), 3.41 (s, 3H, -OCH<sub>3</sub>); <sup>13</sup>C NMR (100 MHz, CDCl<sub>3</sub>, TMS)  $\delta$  168.1, 139.0, 137.4, 136.7, 136.5, 128.8, 128.7, 128.47, 128.2, 127.8, 126.1, 101.4, 100.3, 96.8, 82.5, 79.5, 78.7, 77.7, 77.6, 76.2, 75.3, 71.5, 71.1, 71.0, 69.1, 62.3, 55.8; HRMS (ESI) Calcd for C<sub>41</sub>H<sub>42</sub>O<sub>11</sub>Na [M+Na]<sup>+</sup>: 733.2625, found: 733.2642. The NOE correlation observed between  $\delta$  5.18 and  $\delta$  3.47 confirmed the stereochemistry at C-1 to be  $\beta$ .

**Methyl 2,3,6-tri-*O*-benzyl-4-*O*-(3',4'-di-*O*-benzyl- $\beta$ -D-mannopyranurono-2',6'-lacton-1'-yl)- $\alpha$ -D-glucopyranoside (**7eβ**)**

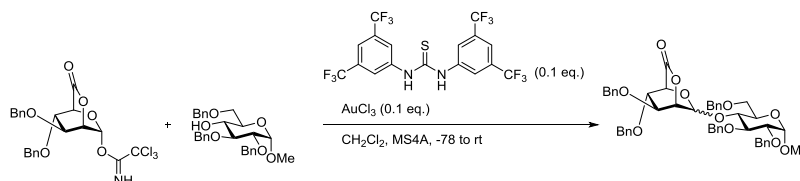

**6e**<sup>[8]</sup> was used as an acceptor. After getting the crude mixture, acetylation was performed for expediting purification by standard procedure using Ac<sub>2</sub>O and DMAP in pyr./CH<sub>2</sub>Cl<sub>2</sub>. Under Ar, to a solution of residue in anhydrous CH<sub>2</sub>Cl<sub>2</sub>, anhydrous Pyr. and Ac<sub>2</sub>O (1.0 equiv. to **6e**) was added DMAP (0.6 mg, 4.4  $\mu$ mol) at 0 °C. After the TLC analysis showed the completion of acetylation, the mixture was extracted with CH<sub>2</sub>Cl<sub>2</sub>, and the organic layer was washed with water, 1 M KHSO<sub>4</sub> aq. and brine, dried over Na<sub>2</sub>SO<sub>4</sub> and concentrated *in vacuo*. The residue was purified by column chromatography (Hexane/EtOAc = 2/1). The mixture of  $\alpha$ - and  $\beta$ -anomers was analyzed by HPLC (column, Mightysil, RP-18 MS 150-4.6 (5  $\mu$ m); eluent, CH<sub>3</sub>CN/H<sub>2</sub>O = 80/20; flow rate, 1.0 ml/min;  $t_R$   $\alpha$ -mannoside 12.521 min;  $t_R$   $\beta$ -mannoside 10.554 min). For **7eβ**: Colorless oil,  $R_f$  = 0.32 (Hexane/Acetone = 7:3, v/v);  $[\alpha]^{20}_D$  = -6.5 ( $c$  0.3, CHCl<sub>3</sub>); <sup>1</sup>H NMR (400 MHz, CDCl<sub>3</sub>, TMS)  $\delta$  7.40-7.16 (m, 25H, Ar-H), 5.24 (s, 1H, H-1'), 4.89 & 4.80 (ABq,  $J$  = 9.8 Hz, 2H, PhCH<sub>2</sub>), 4.80 & 4.65 (ABq,  $J$  = 12.2 Hz, 2H, PhCH<sub>2</sub>), 4.65 (s, 1H, H-2'), 4.62 & 4.45 (ABq,  $J$  = 11.2 Hz, 2H, PhCH<sub>2</sub>), 4.59 (d,  $J_{1,2}$  = 3.6 Hz, 1H, H-1), 4.58 & 4.38 (ABq,  $J$  = 11.4 Hz, 2H, PhCH<sub>2</sub>), 4.46 (s, 1H, H-5'), 4.33 & 4.24 (ABq,  $J$  = 11.6 Hz, 2H, PhCH<sub>2</sub>), 3.97 (dd,  $J_{3,4}$  = 9.2 Hz,  $J_{3,2}$  = 9.2 Hz, 1H, H-3), 3.84-3.81 (m, 0.5 H, H-4), 3.80 (d,  $J_{4,3}$  = 9.2 Hz, 0.5H, H-4), 3.82-3.79 (m, 1H, H-6), 3.75-3.71 (m, 1H, H-5 & H-4'), 3.61-3.58 (m, 1H, H-6), 3.50 (dd,  $J_{2,3}$  = 9.2,  $J_{2,1}$  = 3.6 Hz, 1H, H-2), 3.41 (s, 1H, H-3'), 3.37 (s, 3H, -OCH<sub>3</sub>); <sup>13</sup>C NMR (100 MHz, CDCl<sub>3</sub>, TMS)  $\delta$  168.3, 138.4, 138.0, 137.8, 136.7, 136.7, 128.7, 128.6, 128.5, 128.4, 128.4, 128.4, 128.3, 128.2, 128.1, 128.1, 128.0, 127.7, 127.6, 98.3, 96.5, 80.8, 79.6, 79.3, 77.7, 76.1, 75.9, 75.3, 73.5, 73.4, 71.1, 70.9, 70.8, 69.2, 68.3, 55.3; HRMS (ESI) Calcd for C<sub>48</sub>H<sub>50</sub>O<sub>11</sub>Na [M+Na]<sup>+</sup>: 825.3251, found: 825.3266. The NOE correlation observed between  $\delta$  5.24 and  $\delta$  3.41 confirmed the stereochemistry at C-1 to be  $\beta$ .

## Methyl

### 2,3,4-tri-*O*-benzyl-6-*O*-(3'-di-*O*-benzyl-4'-*O*-*tert*-butyldimethylsilyl-D-mannopyranurono-2',6'-lacton-1'-yl)- $\alpha$ -D-glucopyranoside (**7f $\alpha$** and **$\beta$** )

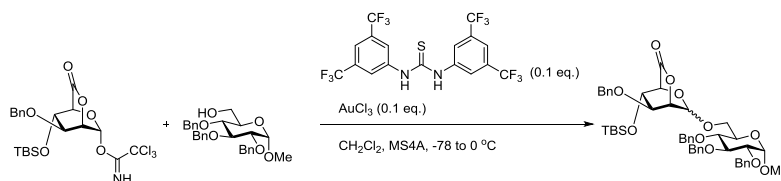

Glycosyl imidate **5da** and glycosyl acceptor **6a** were used. The residue was purified by column chromatography (Hexane/EtOAc = 4/1  $\rightarrow$  2/1). For **7f $\beta$** : Colorless oil,  $R_f$  = 0.46 (Hexane/EtOAc = 3/1, v/v);  $[\alpha]_D^{20}$  = +18.1 ( $c$  0.6, CHCl<sub>3</sub>); <sup>1</sup>H NMR (400 MHz, CDCl<sub>3</sub>, TMS)  $\delta$  7.34-7.27 (m, 20H, Ar-H), 4.99 & 4.80 (ABq,  $J$  = 11.0 Hz, 2H, PhCH<sub>2</sub>), 4.87 & 4.56 (ABq,  $J$  = 11.2 Hz, 2H, PhCH<sub>2</sub>), 4.78 & 4.65 (ABq,  $J$  = 11.6 Hz, 2H, PhCH<sub>2</sub>), 4.73 (s, 1H, H-1'), 4.64 (s, 1H, H-2'), 4.60 & 4.55 (ABq,  $J$  = 11.8 Hz, 2H, PhCH<sub>2</sub>), 4.57 (d,  $J_{1,2}$  = 3.6 Hz, 1H, H-1), 4.17 (s, 1H, H-5'), 4.00 (d,  $J_{3,2}$  = 9.6 Hz, 0.5H, H-3), 3.99-3.95 (m, 2.5H, H-3, H-4', H-6), 3.79-3.75 (m, 1H, H-5), 3.59-3.55 (m, 1H, H-6), 3.51 (dd,  $J_{2,3}$  = 9.6 Hz,  $J_{2,1}$  = 3.2 Hz, 1H, H-2), 3.42 (s, 1H, H-3'), 3.40-3.36 (m, 1H, H-4), 3.35 (s, 3H, -OCH<sub>3</sub>), 0.90 (s, 9H, -C(CH<sub>3</sub>)<sub>3</sub>), 0.11 (s, 3H, -CH<sub>3</sub>), 0.11 (s, 3H, -CH<sub>3</sub>); <sup>13</sup>C NMR (100 MHz, CDCl<sub>3</sub>, TMS)  $\delta$  168.7, 138.8, 138.4, 138.2, 136.7, 128.7, 128.5, 128.5, 128.3, 128.2, 128.0, 128.0, 127.9, 127.9, 127.8, 127.7, 97.9, 95.6, 82.1, 80.2, 80.1, 77.8, 77.3, 76.0, 75.8, 74.8, 74.5, 74.5, 73.5, 71.1, 69.8, 67.1, 55.2, 25.7, 18.1, -4.5, -4.8; HRMS (ESI) Calcd for C<sub>47</sub>H<sub>58</sub>O<sub>11</sub>SiNa [M+Na]<sup>+</sup>: 849.3646, found: 849.3655. The NOE correlation observed between  $\delta$  4.73 and  $\delta$  3.42 confirmed the stereochemistry at C-1 to be  $\beta$ . For **7f $\alpha$** : Colorless oil,  $R_f$  = 0.38 (Hexane/EtOAc = 3/1, v/v);  $[\alpha]_D^{20}$  = -12.4 ( $c$  0.9, CHCl<sub>3</sub>); <sup>1</sup>H NMR (400 MHz, CDCl<sub>3</sub>, TMS)  $\delta$  7.36-7.20 (m, 20H, Ar-H), 5.24-5.23 (m, 1H, H-1'), 4.99 & 4.83 (ABq,  $J$  = 10.8 Hz, 2H, PhCH<sub>2</sub>), 4.81 & 4.69 (ABq,  $J$  = 12.0 Hz, 2H, PhCH<sub>2</sub>), 4.78 & 4.55 (ABq,  $J$  = 10.4 Hz, 2H, PhCH<sub>2</sub>), 4.73 (s, 1H, H-2'), 4.60 & 4.53 (ABq,  $J$  = 12.0 Hz, 2H, PhCH<sub>2</sub>), 4.57 (d,  $J_{1,2}$  = 3.2 Hz, 1H, H-1), 4.21 (s, 1H, H-5'), 4.06 (dd,  $J_{6,6}$  = 11.6 Hz,  $J_{6,5}$  = 3.6 Hz, 1H, H-6), 4.03 (s, 1H, H-3'), 3.99 (s, 1H, H-4'), 3.97 (dd,  $J_{3,2}$  = 9.2 Hz,  $J_{3,4}$  = 9.2 Hz, 1H, H-3), 3.80 (dd,  $J_{6,6}$  = 11.6 Hz,  $J_{6,5}$  = 2.2 Hz, 1H, H-6), 3.69 (ddd,  $J_{5,4}$  = 9.2 Hz,  $J_{5,6}$  = 3.6 Hz,  $J_{5,6}$  = 2.2 Hz, 1H, H-5), 3.47 (dd,  $J_{2,3}$  = 9.2 Hz,  $J_{2,1}$  = 3.2 Hz, 1H, H-2), 3.44 (dd,  $J_{4,3}$  = 9.2 Hz,  $J_{4,5}$  = 9.2 Hz, 1H, H-4), 3.32 (s, 3H, -OMe), 0.80 (s, 9H, -C(CH<sub>3</sub>)<sub>3</sub>), 0.03 (s, 3H, -CH<sub>3</sub>), 0.03 (s, 3H, -CH<sub>3</sub>); <sup>13</sup>C NMR (100 MHz, CDCl<sub>3</sub>, TMS)  $\delta$  168.7, 138.8, 138.2, 138.1, 136.9, 128.6, 128.6, 128.5, 128.5, 128.2, 128.1, 128.1, 128.0, 127.9, 127.7, 98.1, 97.1, 81.9, 80.0, 77.7, 77.3, 76.6, 75.9, 75.3, 75.3, 74.9, 74.7, 73.4, 71.1, 70.0, 67.4, 55.3, 25.7, 18.1, -4.6, -4.8; HRMS (ESI) Calcd for C<sub>47</sub>H<sub>58</sub>O<sub>11</sub>SiNa [M+Na]<sup>+</sup>: 849.3646, found: 849.3635.

### Scheme S1. Preparations of the authentic samples of the $\alpha$ -glycosides.

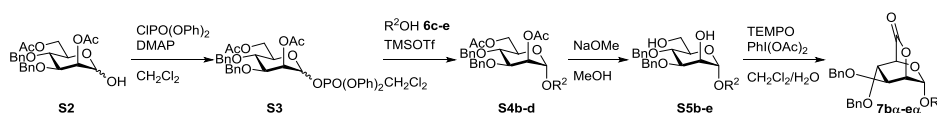

|          | <b>S2</b>    | <b>S3</b>                | <b>7<math>\alpha</math></b> |
|----------|--------------|--------------------------|-----------------------------|
| <b>b</b> | 45.6 mg, 44% | 22.0 mg, 78%             | 4.4 mg, 31%                 |
| <b>c</b> | 34.0 mg, 27% | 8.7 mg, 33%              | 26.9 mg, 69%                |
| <b>d</b> | 42.4 mg, 53% | 25.9 mg, 75%             | 13.9 mg, 64%                |
| <b>e</b> | Not isolated | 12.0 mg, 10% in 2 steps. | 9.2 mg, 77%                 |

### 2,6-Di-*O*-acethyl-3,4-di-*O*-benzyl-D-mannopyranosyl diphenylphosphate (**S3**)



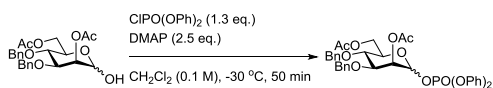

Under Ar atmosphere, to a solution of hemiacetal **S2**<sup>[9]</sup> (1.03 g, 2.31 mmol) in anhydrous CH<sub>2</sub>Cl<sub>2</sub> (23.1 ml) was added diphenyl chlorophosphate (0.62 ml, 3.00 mmol) and DMAP (0.71 g, 5.78 mmol) at -30 °C and the mixture was stirred for 50 min. The reaction was quenched by crashed ice. The mixture was extracted with CH<sub>2</sub>Cl<sub>2</sub>. The combined organic layer was washed with sat. NaHCO<sub>3</sub> aq. brine and dried over Na<sub>2</sub>SO<sub>4</sub>. The extracted organic layer was concentrated *in vacuo*. The residue was purified by flash column chromatography (10 g, hexane → hexane/EtOAc = 7/3), which gave the title compound **S3** as yellow syrup (1.20 g, 81%, mixture of α- and β-anomers). *R*<sub>f</sub> = 0.46 (Hexane/EtOAc = 2:1, v/v); <sup>1</sup>H NMR (400 MHz, CDCl<sub>3</sub>, TMS) δ 7.37-7.20 (m, 20H, Ar-H), 5.89-5.88 & 5.64 (m, 1H, H-1), 5.50-5.48 & 5.39 (m, 1H, H-2), 4.89-4.43 (m, 8H, PhCH<sub>2</sub>×4), 4.30-4.23 (m, 1H, H-5), 4.13-4.10 (m, 1H, H-4), 3.97-3.94 (m, 2H, H-3 & H-6), 3.79-3.63 (m, 1H, H-6), 2.16 & 2.12 (m, 3H, -CH<sub>3</sub>), 2.00-1.95 (m, 3H, -CH<sub>3</sub>); <sup>13</sup>C NMR (100 MHz, CDCl<sub>3</sub>, TMS) δ 170.7, 169.8, 150.4, 137.7, 137.4, 130.0, 128.6, 128.2, 128.2, 128.1, 125.8, 120.5, 120.1, 96.8, 75.4, 73.2, 72.1, 72.0, 67.8, 67.7, 62.7, 20.9, 20.8; HRMS (ESI) Calcd for C<sub>36</sub>H<sub>37</sub>NaO<sub>11</sub>P [M+Na]<sup>+</sup>: 699.1971, found: 699.1973.

### Procedure for the reactions from **S3** to **S4**

Under Ar atmosphere, to a glycosyl phosphate **S3** and glycosyl acceptor **6b-d** (1.2 equiv. to **S3**) was added anhydrous CH<sub>2</sub>Cl<sub>2</sub> (0.1 M to **S3**) at room temperature. After stirring for 15 min, TMSOTf (1.2 equiv. to **S3**) were added at 0 °C and the mixture was stirred. After the TLC analysis showed the completion of reaction, the reaction was quenched by Et<sub>3</sub>N at 0 °C. The mixture was poured to water, and extracted with CH<sub>2</sub>Cl<sub>2</sub>. The organic layer was washed with water and brine, dried over Na<sub>2</sub>SO<sub>4</sub> and concentrated *in vacuo*. The residue was purified by flash column chromatography, which gave the title compound **S4**.

### Methyl 2,3-*O*-isopropylidene-4-*O*-(2',6'-di-*O*-acetyl-3',4'-di-*O*-benzyl-α-D-mannopyranosyl)-α-L-rhamnopyranoside (**S4b**)

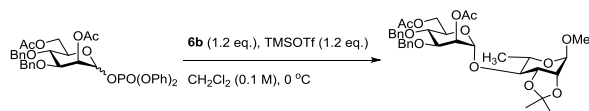

**6b** was used as an acceptor. The residue was purified by flash column chromatography (Hexane/EtOAc = 9/1 → Hexane/EtOAc = 4/1 → Hexane/EtOAc = 7/3). Colorless oil; *R*<sub>f</sub> = 0.46 (Hexane/EtOAc = 2:1, v/v); [α]<sub>D</sub><sup>20</sup> = +4.5 (*c* 1.5, CHCl<sub>3</sub>); <sup>1</sup>H NMR (400 MHz, CDCl<sub>3</sub>, TMS) δ 7.34-7.29 (m, 10H, Ar-H), 5.31 (dd, *J*<sub>2'1'</sub> = 1.6 Hz, *J*<sub>2'3'</sub> = 3.2 Hz, 1H, H-2'), 4.96 (d, *J*<sub>1'2'</sub> = 1.6 Hz, 1H, H-1'), 4.90 & 4.55 (ABq, *J* = 10.4 Hz, 2H, PhCH<sub>2</sub>), 4.83 (s, 1H, H-1), 4.70 & 4.56 (ABq, *J* = 11.2 Hz, 2H, PhCH<sub>2</sub>), 4.52 (dd, *J*<sub>6'6'</sub> = 12.0 Hz, *J*<sub>6'5'</sub> = 2.4 Hz, 1H, H-6'), 4.22 (dd, *J*<sub>6'6'</sub> = 12.0 Hz, *J*<sub>6'5'</sub> = 2.0 Hz, 1H, H-6'), 4.16 (ddd, *J*<sub>5'6'</sub> = 9.6 Hz, *J*<sub>5'6'</sub> = 2.4 Hz, *J*<sub>5'6'</sub> = 2.0 Hz, 1H, H-5'), 4.08 (d, *J* = 5.6 Hz, 1H, H-2), 4.02 (dd, *J*<sub>3,2</sub> = 5.6 Hz, *J*<sub>3,4</sub> = 7.2 Hz, 1H, H-3), 3.98 (dd, *J*<sub>3'2'</sub> = 3.2 Hz, *J*<sub>3'4'</sub> = 9.6 Hz, 1H, H-3'), 3.89 (dd, *J*<sub>4'3'</sub> = 9.6 Hz, *J*<sub>4'5'</sub> = 9.6 Hz, 1H, H-4'), 3.67-3.60 (m, 1H, H-5), 3.36 (s, 3H, -OCH<sub>3</sub>), 3.34 (dd, *J*<sub>4,3</sub> = 7.2 Hz, 0.5H, H-4), 3.33-3.32 (m, 0.5H, H-4), 2.16 (s, 3H, -OAc), 2.07 (s, 3H, -OAc), 1.51 (s, 3H, -CH<sub>3</sub>), 1.30 (s, 3H, -CH<sub>3</sub>), 1.28-1.27 (m, 3H, C-5); <sup>13</sup>C NMR (100 MHz, CDCl<sub>3</sub>, TMS) δ 170.9, 170.6, 138.1, 137.9, 128.5, 128.3, 128.1, 128.0, 127.9, 109.3, 98.5, 98.0, 81.2, 78.1, 76.7, 76.0, 75.4, 73.7, 71.9, 69.6, 68.8, 64.6, 63.0, 54.9, 28.2, 26.4, 21.2, 21.0, 17.5; HRMS (ESI) Calcd for C<sub>30</sub>H<sub>40</sub>O<sub>10</sub> [M+Na]<sup>+</sup>: 667.2731, found: 667.2748.

## Allyl

### 2-*O*-(2',6'-di-*O*-acetyl-3',4'-di-*O*-benzyl- $\alpha$ -D-mannopyranosyl)-3-*O*-benzyl-4,6-*O*-benzylidene- $\alpha$ -D-mannopyranoside (S4c)

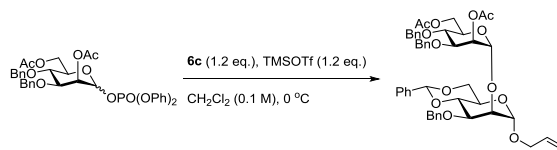

**6c** was used as an acceptor. The residue was purified column chromatography (Hexane/EtOAc = 13/7). Colorless oil;  $R_f$  = 0.53 (Hexane/EtOAc = 3/1, v/v);  $[\alpha]_D^{20}$  = +20.5 ( $c$  0.7, CHCl<sub>3</sub>); <sup>1</sup>H NMR (400 MHz, CDCl<sub>3</sub>, TMS)  $\delta$  7.51-7.27 (m, 20H, Ar-H), 5.86 (dddd,  $J_{\beta,\gamma trans}$  = 17.2 Hz,  $J_{\beta,\gamma cis}$  = 10.4 Hz,  $J_{\beta,\alpha 2}$  = 5.6 Hz,  $J_{\beta,\alpha 1}$  = 4.8 Hz, 1H, H- $\beta$ ), 5.64 (s, 1H, PhCH), 5.59 (s, 1H, H-2'), 5.25 (d,  $J_{\gamma trans,\beta}$  = 17.2 Hz, 1H, H- $\gamma trans$ ), 5.20 (d,  $J_{\gamma cis,\beta}$  = 10.4 Hz, 1H, H- $\gamma cis$ ), 5.12 (s, 1H, H-1'), 4.90 & 4.54 (ABq,  $J$  = 10.4 Hz, 2H, PhCH<sub>2</sub>), 4.86 & 4.65 (ABq,  $J$  = 12.0 Hz, 2H, PhCH<sub>2</sub>), 4.83 (s, 1H, H-1), 4.78 & 4.56 (ABq,  $J$  = 10.8 Hz, 2H, PhCH<sub>2</sub>), 4.36-4.28 (m, 2H, H-6', H-6'), 4.15 (dd,  $J_{\alpha 1,\alpha 2}$  = 12.8 Hz,  $J_{\alpha 1,\beta}$  = 4.8 Hz, 1H, H- $\alpha 1$ ), 4.07-4.05 (m, 1H, H-3'), 4.03 (m, 2H, H-2, H-5), 3.99-3.97 (m, 3H, H-4, H-5, H- $\alpha 1$ ), 3.84-3.80 (m, 2H, H-3, H-6), 3.75-3.70 (m 1H, H-4'), 2.13 (s, 3H, -CH<sub>3</sub>), 2.06 (s, 3H, -CH<sub>3</sub>); <sup>13</sup>C NMR (100 MHz, CDCl<sub>3</sub>, TMS)  $\delta$  170.8, 169.9, 138.5, 137.9, 137.9, 137.6, 133.4, 129.0, 128.5, 128.4, 128.3, 128.3, 128.1, 127.9, 127.6, 127.5, 126.1, 117.8, 101.6, 100.0, 99.0, 79.2, 78.0, 77.4, 76.6, 75.7, 75.5, 74.2, 73.2, 71.9, 70.3, 68.8, 68.3, 68.2, 64.0, 63.6, 21.1, 20.9; HRMS (ESI) Calcd for C<sub>47</sub>H<sub>52</sub>O<sub>13</sub> [M+Na]<sup>+</sup>: 847.3306, found: 847.3314.

## Methyl

### 2-*O*-(2',6'-di-*O*-acetyl-3',4'-di-*O*-benzyl- $\alpha$ -D-mannopyranosyl)-3-*O*-benzyl-4,6-*O*-benzylidene- $\alpha$ -D-glucopyranoside (S4d)

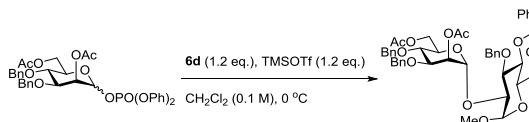

**6d** was used as an acceptor. The residue was purified by column chromatography (Hexane/EtOAc = 13/7). Colorless oil;  $R_f$  = 0.49 (Hexane/EtOAc = 2:1, v/v);  $[\alpha]_D^{20}$  = +28.2 ( $c$  0.3, CHCl<sub>3</sub>); <sup>1</sup>H NMR (400 MHz, CDCl<sub>3</sub>, TMS)  $\delta$  7.50-7.05 (m, 20H, Ar-H), 5.44 (dd,  $J_{2',3'} = 3.6$ ,  $J_{2',1'} = 1.6$  Hz, 1H, H-2'), 4.95 (d,  $J_{1',2'} = 1.6$  Hz, 1H, H-1'), 4.92 & 4.54 (ABq,  $J$  = 11.0 Hz, 2H, PhCH<sub>2</sub>), 4.86 (d,  $J$  = 3.6 Hz, 1H, H-1), 4.79 & 4.64 (ABq,  $J$  = 10.8 Hz, 2H, PhCH<sub>2</sub>), 4.72 & 4.54 (ABq,  $J$  = 11.2 Hz, 2H, PhCH<sub>2</sub>), 4.32-4.29 (m, 1H, H-6), 4.19-4.13 (m, 3H, H-6', H-6', H-5'), 4.05 (dd,  $J_{3',4'} = 9.2$ ,  $J_{3',2'} = 3.6$  Hz, 1H, H-3'), 3.96-3.94 (m, 0.5H, H-4), 3.92 (d,  $J_{4,3} = 9.2$  Hz, 0.5H, H-4), 3.88-3.81 (m, 1H, H-5), 3.83 (dd,  $J_{2,3} = 9.2$  Hz,  $J_{2,1} = 3.6$  Hz, 1H, H-2), 3.79-3.73 (m, 2H, H-4' & H-6), 3.64 (dd,  $J_{3,2} = 9.2$  Hz,  $J_{3,4} = 9.2$  Hz, 1H, H-3), 3.46 (s, 3H, -OCH<sub>3</sub>), 2.16 (s, 3H, -OAc), 2.03 (s, 3H, -OAc); <sup>13</sup>C NMR (100 MHz, CDCl<sub>3</sub>, TMS)  $\delta$  170.7, 170.4, 138.4, 137.9, 137.8, 137.4, 128.4, 128.1, 127.9, 127.7, 126.0, 101.4, 97.2, 94.8, 82.4, 78.0, 75.6, 75.2, 74.2, 73.8, 71.9, 69.9, 69.1, 68.8, 63.0, 62.3, 55.5, 21.2, 20.9; HRMS (ESI) Calcd for C<sub>45</sub>H<sub>50</sub>O<sub>13</sub> [M+Na]<sup>+</sup>: 821.3149, found: 821.3153.

## Procedure for the reactions from S4 to S5

To **S4b-d** was added 0.1 M solution of MeONa in MeOH (1.0 equiv. to **S4**) at room temperature and the mixture was stirred for 30 min. To the mixture was added protonic ion-exchanger resin, AMBERLYST 15 (H<sup>+</sup>), until the pH of the mixture became about 7. The resin was removed by filtration through a cotton pad, and the filtrate was concentrated *in vacuo*. The residue was purified by column chromatography to give **S5**.

### Methyl 2,3-*O*-isopropylidene-4-*O*-(3',4'-di-*O*-benzyl- $\alpha$ -D-mannopyranosyl)- $\alpha$ -L-rhamnopyranoside (S5b)

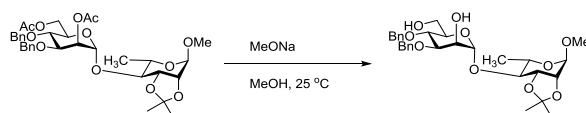

**S4b** was employed. The residue was purified by column chromatography (Hexane/EtOAc = 7/13). Colorless oil;  $R_f$  = 0.69 (CHCl<sub>3</sub>/MeOH = 9:1, v/v);  $[\alpha]^{20}_D$  = +21.4 (*c* 0.6, CHCl<sub>3</sub>); <sup>1</sup>H NMR (400 MHz, CDCl<sub>3</sub>, TMS)  $\delta$  7.35-7.29 (m, 10H, Ar-H), 4.94 (s, 1H, H-1'), 4.86 & 4.62 (ABq, *J* = 11.2 Hz, 2H, PhCH<sub>2</sub>), 4.84 (s, 1H, H-1), 4.72 & 4.62 (ABq, *J* = 11.4 Hz, 2H, PhCH<sub>2</sub>), 4.10-4.07 (m, 2H, H-2 & H-3), 3.99 (br, 1H, H-2'), 3.94-3.93 (m, 1H, H-5'), 3.87-3.84 (m, 2H, H-3' & H-6'), 3.75-3.71 (m, 2H, H-4' & H-6'), 3.66-3.59 (m, 1H, H-5), 3.36 (s, 1H, -OMe), 3.31-3.29 (m, 1H, H-4), 2.76 (br, 1H, -OH), 2.56 (s, 1H, -OH), 1.52 (s, 3H, -CH<sub>3</sub>), 1.31 (s, 3H, -CH<sub>3</sub>), 1.26-1.24 (m, 3H, C-5); <sup>13</sup>C NMR (100 MHz, CDCl<sub>3</sub>, TMS)  $\delta$  138.2, 137.8, 128.7, 128.5, 128.2, 128.1, 128.1, 128.0, 109.3, 100.8, 98.0, 83.0, 80.0, 75.9, 75.2, 74.6, 72.4, 72.4, 68.8, 64.3, 62.3, 54.9, 28.0, 26.2, 17.6, 14.3; HRMS (ESI) Calcd for C<sub>34</sub>H<sub>44</sub>O<sub>12</sub> [M+Na]<sup>+</sup>: 583.2519, found: 583.2505.

### Allyl 2-*O*-(3',4'-di-*O*-benzyl- $\alpha$ -D-mannopyranosyl)-3-*O*-benzyl-4,6-*O*-benzylidene- $\alpha$ -D-mannopyranoside (S5c)

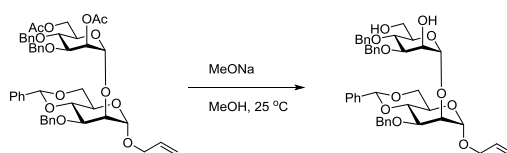

**S4c** was employed. The residue was purified by column chromatography (Hexane/EtOAc = 1/1). Colorless oil;  $R_f$  = 0.55 (Hexane/EtOAc = 1:2, v/v);  $[\alpha]^{20}_D$  = +32.9 (*c* 0.5, CHCl<sub>3</sub>); <sup>1</sup>H NMR (400 MHz, CDCl<sub>3</sub>, TMS)  $\delta$  7.52-7.27 (m, 20H, Ar-H), 5.86 (dddd, *J* <sub>$\beta,\gamma$ trans</sub> = 17.2 Hz, *J* <sub>$\beta,\gamma$ cis</sub> = 10.4 Hz, *J* <sub>$\beta,\alpha 1$</sub>  = 4.8 Hz, *J* <sub>$\beta,\alpha 2$</sub>  = 4.6 Hz, 1H, H- $\beta$ ), 5.62 (s, 1H, PhCH), 5.25 (d, *J* <sub>$\gamma$ trans, $\beta$</sub>  = 17.2 Hz, 1H, H- $\gamma$ trans), 5.20 (d, *J* <sub>$\gamma$ cis, $\beta$</sub>  = 10.4 Hz, 1H, H- $\gamma$ cis), 5.16 (s, 1H, H-1'), 4.88 & 4.65 (ABq, *J* = 10.8 Hz, 2H, PhCH<sub>2</sub>), 4.86 (d, *J* = 1.6 Hz, H-1), 4.83 & 4.68 (ABq, *J* = 12.0 Hz, 2H, PhCH<sub>2</sub>), 4.73 (s, 2H, PhCH<sub>2</sub>), 4.26-4.20 (m, 2H, H-2', H-3), 4.13 (dd, *J* <sub>$\alpha 1,\alpha 2$</sub>  = 12.8 Hz, *J* <sub>$\alpha 1,\beta$</sub>  = 4.8 Hz, 1H, H- $\alpha 1$ ), 4.04-4.00 (m, 3H, H-2, H-5, H-6), 3.97-3.92 (m, 1H, H-3'), 3.94 (dd, *J* <sub>$\alpha 2,\alpha 1$</sub>  = 12.8 Hz, *J* <sub>$\alpha 2,\beta$</sub>  = 4.6 Hz, 1H, H- $\alpha 2$ ), 3.86-3.83 (m, 1H, H-4'), 3.81-3.73 (m, 5H, H-4, H-6, H-5', H-6', H-6'), 2.52 (br, 1H, -OH), 1.98 (br, 1H, -OH); <sup>13</sup>C NMR (100 MHz, CDCl<sub>3</sub>, TMS)  $\delta$  138.4, 138.1, 137.9, 137.6, 129.0, 128.6, 128.6, 128.5, 128.3, 128.2, 128.0, 127.9, 127.6, 127.6, 126.1, 117.8, 101.6, 98.9, 79.7, 79.1, 77.3, 75.9, 75.4, 74.2, 73.3, 72.2, 72.2, 68.9, 68.4, 68.1, 64.1, 62.1; HRMS (ESI) Calcd for C<sub>43</sub>H<sub>48</sub>O<sub>11</sub> [M+Na]<sup>+</sup>: 763.3094, found: 763.3089.

### Methyl 2-*O*-(3',4'-di-*O*-benzyl- $\alpha$ -D-mannopyranosyl)-3-*O*-benzyl-4,6-*O*-benzylidene- $\alpha$ -D-glucopyranoside (S5d)

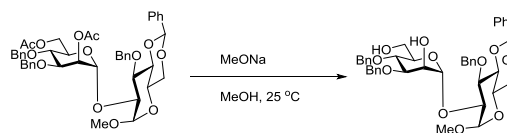

**S4d** was employed. The residue was purified by column chromatography (Hexane/EtOAc = 1/4). Colorless oil;  $R_f$  = 0.55 (Hexane/EtOAc = 1/4, v/v);  $[\alpha]^{20}_D$  = +23.0 (*c* 0.3, CHCl<sub>3</sub>); <sup>1</sup>H NMR (400 MHz, CDCl<sub>3</sub>, TMS)  $\delta$  7.49-7.07 (m, 20H, Ar-H), 5.58 (s, 1H, PhCH), 5.02 (s, 1H, H-1'), 4.90-4.87 (m, 1H, H-1), 4.89 & 4.65 (ABq, *J* = 11.0 Hz, 2H, PhCH<sub>2</sub>), 4.81 & 4.67 (ABq, *J* = 10.6 Hz, 2H, PhCH<sub>2</sub>), 4.71 (s, 2H, PhCH<sub>2</sub>), 4.32-4.28 (m, 1H, H-6), 4.17 (s, 1H, H-2'), 4.00-3.81 (m, 7H, H-3', H-5', H-6', H-2, H-3, H-6), 3.77-3.64 (m, 3H, H-4', H-4, H-5), 3.44 (s, 3H, -OCH<sub>3</sub>), 2.63 (br, 1H, -OH), 1.69 (br, 1H, -OH); <sup>13</sup>C NMR (100 MHz, CDCl<sub>3</sub>, TMS)  $\delta$  138.7, 137.9, 137.9, 137.4, 129.0, 128.7, 128.6, 128.4, 128.3, 128.0, 127.9, 127.9, 127.8, 127.7, 126.0, 101.3, 97.1, 96.1, 82.3, 79.9, 76.9, 75.7, 75.1, 73.8, 73.7, 72.2, 71.7, 69.1, 68.6, 62.4, 61.6, 55.4; HRMS (ESI) Calcd for C<sub>41</sub>H<sub>46</sub>O<sub>11</sub> [M+Na]<sup>+</sup>: 737.2938, found: 737.2950.

## Methyl 2,3,6-tri-*O*-benzyl-4-*O*-(3',4'-di-*O*-benzyl- $\alpha$ -D-mannopyranosyl)- $\alpha$ -D-glucopyranoside (**S5e**)

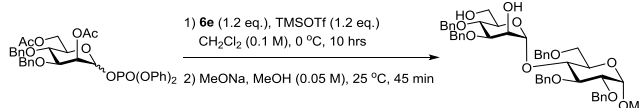

Under Ar atmosphere, to a glycosyl phosphate **S3** (100.1 mg, 155.2  $\mu$ mol) and glycosyl acceptor **6e** (79.3 mg, 186.3  $\mu$ mol) was added anhydrous  $\text{CH}_2\text{Cl}_2$  (1.55 ml) at room temperature. After stirring for 15 min, TMSOTf (28.0  $\mu$ l, 155.2  $\mu$ mol) were added at 0  $^\circ\text{C}$  and the mixture was stirred for 30 min. After the TLC analysis showed the completion of reaction, the reaction was quenched by  $\text{Et}_3\text{N}$  at 0  $^\circ\text{C}$ . The mixture was poured to water, and extracted with  $\text{CH}_2\text{Cl}_2$ . The organic layer was washed with water and brine, dried over  $\text{Na}_2\text{SO}_4$  and concentrated *in vacuo*. To the crude product was added 0.05 M MeONa in MeOH (3.0 ml) at room temperature and the mixture was stirred for 45 min. To the mixture was added protonic ion-exchanger resin, AMBERLYST 15 ( $\text{H}^+$ ), until the pH of the mixture became about 7. The resin was removed by filtration through a cotton pad, and the filtrate was concentrated *in vacuo*. The residue was purified by open column chromatography (7 g, Hexane/EtOAc = 1/1  $\rightarrow$  Hexane/EtOAc = 2/3) to afford **S5e** as colorless oil (12.0 mg, 10% in 2 steps.).  $R_f$  = 0.27 (Hexane/EtOAc = 1:1, v/v);  $[\alpha]^{20}_{\text{D}} = +36.6$  ( $c$  0.6,  $\text{CHCl}_3$ );  $^1\text{H}$  NMR (400 MHz,  $\text{CDCl}_3$ , TMS)  $\delta$  7.33-7.30 (m, 25H, Ar-H), 5.31 (s, 1H, H-1'), 5.04-5.01 (m, 1H), 4.86-4.83 (m, 1H), 4.75-4.72 (m, 1H), 4.61-4.51 (m, 9H), 3.88-3.84 (m, 2H), 3.76-3.62 (m, 10H), 3.55-3.51 (m, 1H), 3.39 (s, 3H,  $-\text{OCH}_3$ );  $^{13}\text{C}$  NMR (100 MHz,  $\text{CDCl}_3$ , TMS)  $\delta$  138.5, 138.3, 138.1, 138.0, 128.6, 128.6, 128.5, 128.4, 128.2, 128.1, 127.8, 127.8, 127.6, 127.6, 101.3, 97.8, 81.8, 80.3, 79.7, 75.6, 75.2, 74.0, 73.6, 73.3, 72.7, 72.1, 69.8, 69.0, 68.9, 62.1, 55.4; HRMS (ESI) Calcd for  $\text{C}_{48}\text{H}_{54}\text{O}_{11}$   $[\text{M}+\text{Na}]^+$ : 829.3564, found: 829.3588.

## Procedure for the reaction from **S5** to **7**

To **S5b-e** and  $\text{PhI}(\text{OAc})_2$  (3.5 equiv. to **S5**) in  $\text{CH}_2\text{Cl}_2$  and  $\text{H}_2\text{O}$  (0.1 M to **S5**, 2/1, v/v) was added TEMPO (0.2 equiv. to **S5**) at room temperature and the mixture was stirred. After the TLC analysis showed the completion of reaction, the reaction was quenched by 10%  $\text{Na}_2\text{S}_2\text{O}_3$  aq. and the mixture was extracted with  $\text{CH}_2\text{Cl}_2$ . The organic layer was washed with water and brine, dried over  $\text{Na}_2\text{SO}_4$  and concentrated *in vacuo*. The residue was purified by column chromatography, which gave the title compound **7ab-e**.

## Methyl

## 2,3-*O*-isopropylidene-4-*O*-(3',4'-di-*O*-benzyl- $\alpha$ -D-mannopyranurono-2',6'-lacton-1'-yl)- $\alpha$ -L-rhamnopyranoside (**7ba**)

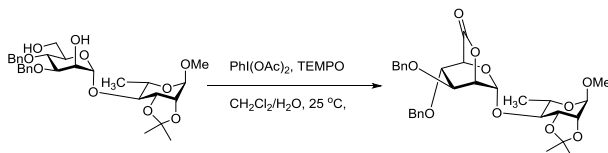

**S5b** was used. The residue was purified by column chromatography (Hexane/EtOAc = 3/1). Colorless oil,  $R_f$  = 0.57 (Hexane/EtOAc = 2:1, v/v);  $[\alpha]^{20}_{\text{D}} = +7.1$  ( $c$  0.9,  $\text{CHCl}_3$ );  $^1\text{H}$  NMR (400 MHz,  $\text{CDCl}_3$ , TMS)  $\delta$  7.35-7.29 (m, 10H, Ar-H), 5.43-5.42 (m, 1H, H-1'), 4.83 (s, 1H, H-1), 4.69 (s, 1H, H-2'), 4.67 & 4.49 (ABq,  $J$  = 11.8 Hz, 2H,  $\text{PhCH}_2$ ), 4.58 (s, 1H, H-5'), 4.55 & 4.51 (ABq,  $J$  = 11.8 Hz, 2H,  $\text{PhCH}_2$ ), 4.35 (dd,  $J_{3,2}$  = 6.0 Hz,  $J_{3,4}$  = 6.8 Hz, 1H, H-3), 4.14 (s, 1H, H-3'), 4.09 (d,  $J_{2,3}$  = 6.0 Hz, 1H, H-2), 3.69-3.61 (m, 1H, H-5), 3.37 (s, 1H,  $-\text{OCH}_3$ ), 3.35-3.34 (m, 0.5H, H-4), 3.34 (d,  $J_{4,3}$  = 6.8 Hz, 0.5H, H-4), 1.53 (s, 3H,  $-\text{CH}_3$ ), 1.35 (s, 3H,  $-\text{CH}_3$ ), 1.16-1.15 (m, 3H, C-5);  $^{13}\text{C}$  NMR (100 MHz,  $\text{CDCl}_3$ , TMS)  $\delta$  168.3, 137.1, 137.0, 128.6, 128.6, 128.2, 128.1, 127.9, 109.5, 98.2, 96.8, 83.2, 79.7, 77.3, 76.7, 75.8, 75.4, 74.1, 71.6, 71.1, 71.0, 63.8, 55.0, 28.1, 26.3, 17.8; HRMS (ESI) Calcd for  $\text{C}_{34}\text{H}_{44}\text{O}_{12}\text{Na}$   $[\text{M}+\text{Na}]^+$ : 579.2206, found: 579.2215.

## Allyl

### 2-*O*-(3',4'-di-*O*-benzyl- $\alpha$ -D-mannopyranurono-2',6'-lacton-1'-yl)-3-*O*-benzyl-4,6-*O*-benzylidene- $\alpha$ -D-mannopyranoside (7c $\alpha$ )

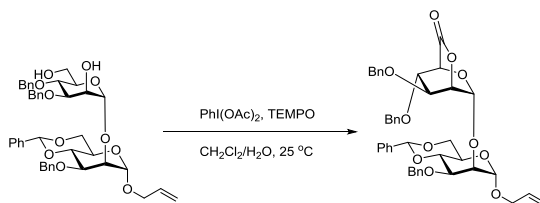

**S5c** was used. The residue was purified by column chromatography (Hexane/EtOAc = 3/1). Colorless oil;  $R_f$  = 0.66 (Hexane/EtOAc = 2:1, v/v);  $[\alpha]^{20}_D$  = +30.0 ( $c$  0.4, CHCl<sub>3</sub>); <sup>1</sup>H NMR (400 MHz, CDCl<sub>3</sub>, TMS)  $\delta$  7.52-7.30 (m, 20H, Ar-H), 5.87 (dddd,  $J_{\beta,\gamma trans}$  = 19.2 Hz,  $J_{\beta,\gamma cis}$  = 11.2 Hz,  $J_{\beta,\alpha 1}$  = 6.0 Hz,  $J_{\beta,\alpha 2}$  = 5.2 Hz, 1H, H- $\beta$ ), 5.60 (s, 1H, PhCH), 5.47-5.46 (s, 1H, H-1'), 5.17 (d,  $J_{\gamma trans,\beta}$  = 19.2 Hz, 1H, H- $\gamma trans$ ), 5.13 (d,  $J_{\gamma cis,\beta}$  = 11.2 Hz, 1H, H- $\gamma cis$ ), 4.92 (s, 1H, H-2'), 4.88 (d,  $J_{1,2}$  = 1.6 Hz, 1H, H-1), 4.83 & 4.68 (ABq,  $J$  = 12.0 Hz, 2H, PhCH<sub>2</sub>), 4.61 & 4.50 (ABq,  $J$  = 11.6 Hz, 2H, PhCH<sub>2</sub>), 4.56 & 4.47 (ABq,  $J$  = 11.6 Hz, 2H, PhCH<sub>2</sub>), 4.49 (s, 1H, H-5'), 4.25-4.22 (m, 1H, H-6), 4.18-4.17 (m, 0.5H, H-2), 4.17 (d,  $J_{2,1}$  = 1.6 Hz, 0.5H, H-2), 3.99-3.92 (m, 3H, H-3, H-4, H- $\alpha 1$ ), 3.81-3.72 (m, 3H, H-3', H-5, H-6), 3.67 (dd,  $J_{\alpha 1,\alpha 2}$  = 12.8 Hz,  $J_{\alpha 1,\beta}$  = 6.0 Hz, 1H, H- $\alpha 1$ ); <sup>13</sup>C NMR (100 MHz, CDCl<sub>3</sub>, TMS)  $\delta$  138.4, 138.2, 137.6, 137.1, 137.0, 133.7, 129.0, 128.6, 128.6, 128.3, 128.2, 128.2, 128.0, 127.9, 127.7, 126.1, 117.4, 101.6, 99.5, 96.9, 79.7, 79.4, 77.3, 75.9, 75.4, 74.8, 73.8, 73.6, 71.6, 71.3, 70.9, 69.0, 68.2, 63.8; HRMS (ESI) Calcd for C<sub>43</sub>H<sub>44</sub>O<sub>11</sub>Na [M+Na]<sup>+</sup>: 759.2781, found: 759.2775.

## Methyl

### 2-*O*-(3',4'-di-*O*-benzyl- $\alpha$ -D-mannopyranurono-2',6'-lacton-1'-yl)-3-*O*-benzyl-4,6-*O*-benzylidene- $\alpha$ -D-glucopyranoside (7d $\alpha$ )

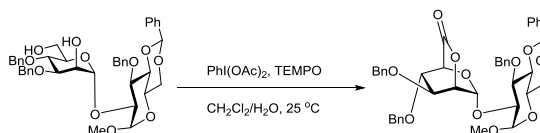

**S5d** was used. The residue was purified by column chromatography (Hexane/EtOAc = 7/3). Colorless oil;  $R_f$  = 0.16 (Hexane/EtOAc = 3:1, v/v);  $[\alpha]^{20}_D$  = +21.5 ( $c$  1.2, CHCl<sub>3</sub>); <sup>1</sup>H NMR (400 MHz, CDCl<sub>3</sub>, TMS)  $\delta$  7.45-7.21 (m, 20H, Ar-H), 5.55 (s, 1H, PhCH), 5.34 (d,  $J_{1',2'}$  = 2.8 Hz, 1H, H-1'), 4.89 (d,  $J_{1,2}$  = 3.6 Hz, 1H, H-1), 4.78 & 4.71 (ABq,  $J$  = 11.4 Hz, 2H, PhCH<sub>2</sub>), 4.77 (d,  $J_{2',1'}$  = 3.6 Hz, 1H, H-2'), 4.53 & 4.46 (ABq,  $J$  = 12.2 Hz, 2H, PhCH<sub>2</sub>), 4.51 (s, 1H, H-5'), 4.48 & 4.41 (ABq,  $J$  = 11.8 Hz, 2H, PhCH<sub>2</sub>), 4.31 (s, 1H, H-3'), 4.29 (dd,  $J_{6,6}$  = 10.0 Hz,  $J_{6,5}$  = 4.4 Hz, 1H, H-6), 4.06 (dd,  $J_{3,2}$  = 9.2,  $J_{2,1}$  = 3.6 Hz, H-2), 3.93 (dd,  $J_{3,2}$  = 9.2 Hz,  $J_{3,4}$  = 9.2 Hz, 1H, H-3), 3.81 (ddd,  $J_{5,6}$  = 10.0 Hz,  $J_{5,4}$  = 9.2 Hz,  $J_{5,6}$  = 4.4 Hz, 1H, H-5), 3.75 (dd,  $J_{6,6}$  = 10.0,  $J_{6,5}$  = 4.4 Hz, 1H, H-6), 3.60 (dd,  $J_{4,3}$  = 9.2 Hz,  $J_{4,5}$  = 9.2 Hz, 1H, H-4), 3.42 (s, 3H, -OCH<sub>3</sub>); <sup>13</sup>C NMR (100 MHz, CDCl<sub>3</sub>, TMS)  $\delta$  168.1, 138.9, 137.4, 137.0, 136.9, 128.6, 128.2, 128.2, 128.0, 127.5, 126.1, 101.4, 97.8, 94.3, 81.5, 79.4, 77.3, 77.0, 76.9, 75.9, 75.0, 74.2, 71.9, 71.0, 71.0, 69.0, 62.5, 55.3; HRMS (ESI) Calcd for C<sub>41</sub>H<sub>42</sub>O<sub>11</sub>Na [M+Na]<sup>+</sup>: 733.2625, found: 733.2642.

### Methyl 2,3,6-tri-*O*-benzyl-4-*O*-(3',4'-di-*O*-benzyl- $\alpha$ -D-mannopyranurono-2',6'-lacton-1'-yl)- $\alpha$ -D-glucopyranoside (7e $\alpha$ )

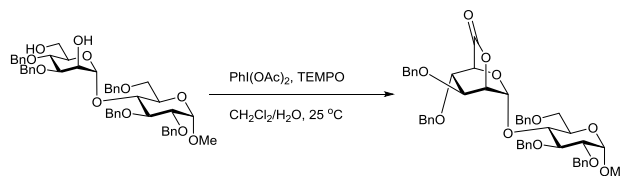

**S5e** was used. The residue was purified by column chromatography (Hexane/EtOAc = 3/1). Colorless oil;  $R_f$  = 0.64 (Hexane/EtOAc = 2:1, v/v);  $[\alpha]_D^{20}$  = +33.5 ( $c$  0.6,  $\text{CHCl}_3$ );  $^1\text{H}$  NMR (400 MHz,  $\text{CDCl}_3$ , TMS)  $\delta$  7.40-7.22 (m, 25H, Ar-H), 5.41-5.40 (m, 1H, H-1'), 4.99 & 4.60 (ABq,  $J$  = 11.6 Hz, 2H,  $\text{PhCH}_2$ ), 4.75 & 4.64 (ABq,  $J$  = 10.6 Hz, 2H,  $\text{PhCH}_2$ ), 4.62 (d,  $J_{1,2}$  = 3.6 Hz, 1H, H-1), 4.72 & 4.62 (ABq,  $J$  = 11.4 Hz, 2H,  $\text{PhCH}_2$ ), 4.53 & 4.37 (ABq,  $J$  = 12.2 Hz, 2H,  $\text{PhCH}_2$ ), 4.45 & 4.36 (ABq,  $J$  = 11.8 Hz, 2H,  $\text{PhCH}_2$ ), 4.40 & 4.31 (ABq,  $J$  = 12.2 Hz, 2H,  $\text{PhCH}_2$ ), 4.35 (s, 1H, H-5'), 4.07 (s, 1H, H-2'), 4.02 (s, 1H, H-3'), 3.87 (d,  $J_{3,2}$  = 9.2 Hz, 0.5H, H-3), 3.86-3.84 (m, 0.5 H, H-3), 3.80-3.75 (m, 2H, H-4 & H-6), 3.68 (s, 1H, H-4'), 3.65-3.60 (m, 2H, H-5 & H-6), 3.53 (dd,  $J_{2,3}$  = 9.2,  $J_{2,1}$  = 3.6 Hz, 1H, H-2), 3.39 (s, 3H,  $-\text{OCH}_3$ );  $^{13}\text{C}$  NMR (100 MHz,  $\text{CDCl}_3$ , TMS)  $\delta$  168.3, 138.5, 138.5, 137.9, 137.1, 136.7, 128.8, 128.6, 128.3, 128.2, 128.2, 128.1, 128.1, 127.9, 127.9, 127.5, 97.9, 97.9, 81.2, 80.1, 79.8, 76.4, 75.6, 74.9, 74.4, 73.4, 73.3, 71.6, 71.3, 71.0, 69.5, 68.3, 55.4; HRMS (ESI) Calcd for  $\text{C}_{48}\text{H}_{54}\text{O}_{11}\text{Na}$   $[\text{M}+\text{Na}]^+$ : 825.3251, found: 825.3241.

### Scheme 3

#### Methyl 2,3,4-tri-*O*-benzyl-6-*O*-(3',4'-di-*O*-benzyl- $\beta$ -D-mannopyranosyl)- $\alpha$ -D-glucopyranoside (**8**)

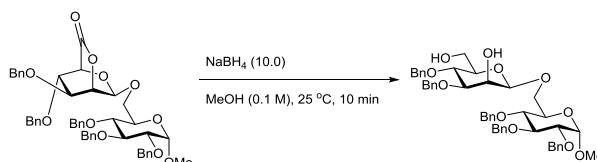

To a solution of **7aβ** (12.1 mg, 12.6  $\mu\text{mol}$ ) in MeOH (0.15 ml) was added  $\text{NaBH}_4$  (5.7 mg, 150.7  $\mu\text{mol}$ ) at room temperature and the mixture was stirred for 10 min. After the TLC analysis showed the completion of reaction, the mixture was poured to water, and extracted with  $\text{CH}_2\text{Cl}_2$ . The organic layer was washed with water and brine, dried over  $\text{Na}_2\text{SO}_4$  and concentrated *in vacuo*. The residue was purified by column chromatography (10 g, Hexane/EtOAc = 1/2), which gave the title compound **8** as colorless oil (9.9 mg, 82%).  $R_f$  = 0.44 (Hexane/EtOAc = 1/3, v/v);  $[\alpha]_D^{20}$  = +21.5 ( $c$  0.4,  $\text{CHCl}_3$ );  $^1\text{H}$  NMR (400 MHz,  $\text{CDCl}_3$ , TMS)  $\delta$  7.38-7.22 (m, 25H, Ar-H), 5.00 & 4.81 (ABq,  $J$  = 10.8 Hz, 2H,  $\text{PhCH}_2$ ), 4.91 & 4.63 (ABq,  $J$  = 10.8 Hz, 2H,  $\text{PhCH}_2$ ), 4.86 & 4.55 (ABq,  $J$  = 11.6 Hz, 2H,  $\text{PhCH}_2$ ), 4.78 & 4.65 (ABq,  $J$  = 11.0 Hz, 2H,  $\text{PhCH}_2$ ), 4.73 & 4.68 (ABq,  $J$  = 12.0 Hz, 2H,  $\text{PhCH}_2$ ), 4.55 (s, 1H, H-1'), 4.14 (s, 1H, H-1), 4.02-3.97 (m, 2H, H-3', H-6), 3.92-3.91 (m, 1H, H-2), 3.85-3.80 (m, 2H, H-3, H-5), 3.78-3.69 (m, 3H, H-5', H-6, H-6), 3.58-3.54 (m, 1H, H-6'), 3.53-3.44 (m, 3H, H-3, H-2', H-4'), 3.34 (s, 3H,  $-\text{OCH}_3$ ), 3.24-3.20 (m, 1H, H-4);  $^{13}\text{C}$  NMR (100 MHz,  $\text{CDCl}_3$ , TMS)  $\delta$  138.8, 138.4, 138.2, 138.1, 137.8, 128.6, 128.6, 128.5, 128.2, 128.0, 128.0, 128.0, 127.9, 127.7, 100.1, 100.0, 98.0, 82.2, 81.2, 79.9, 77.3, 75.8, 75.4, 75.3, 74.8, 74.2, 73.5, 71.6, 69.9, 68.3, 68.3, 62.3, 55.3; HRMS (ESI) Calcd for  $\text{C}_{48}\text{H}_{54}\text{O}_{11}\text{Na}$   $[\text{M}+\text{Na}]^+$ : 829.3564, found: 829.3549.

### Methyl

#### 2,3,4-tri-*O*-benzyl-6-*O*-(methyl(3',4'-di-*O*-benzyl- $\beta$ -D-mannopyranosyl)uronate)- $\alpha$ -D-glucopyranoside (**9**)

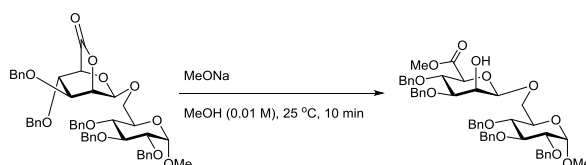

To **7aβ** (10.0 mg, 12.5 μmol) was added 0.01 M solution of MeONa in MeOH (1.25 ml) at room temperature and the mixture was stirred for 10 min. To the mixture was added protonic ion-exchanger resin, AMBERLYST 15 (H<sup>+</sup>), until the pH of the mixture became about 7. The resin was removed by filtration through a cotton pad, and the filtrate was concentrated *in vacuo*. The residue was purified by column chromatography (7 g, Hexane/EtOAc = 1/1), which gave the title compound **9** as colorless oil (7.9 mg, 76%). *R*<sub>f</sub> = 0.47 (Hexane/EtOAc = 1/1, v/v); [α]<sub>D</sub><sup>20</sup> = +13.3 (*c* 0.5, CHCl<sub>3</sub>); <sup>1</sup>H NMR (400 MHz, CDCl<sub>3</sub>, TMS) δ 7.35-7.23 (m, 25H, Ar-H), 4.99 & 4.81 (ABq, *J* = 11.4 Hz, 2H, PhCH<sub>2</sub>), 4.86 & 4.53 (ABq, *J* = 11.4 Hz, 2H, PhCH<sub>2</sub>), 4.84 & 4.62 (ABq, *J* = 11.0 Hz, 2H, PhCH<sub>2</sub>), 4.78 & 4.62 (ABq, *J* = 11.6 Hz, 2H, PhCH<sub>2</sub>), 4.73 & 4.68 (ABq, *J* = 12.0 Hz, 2H, PhCH<sub>2</sub>), 4.54 (d, *J*<sub>1'2'</sub> = 3.6 Hz, 1H, H-1'), 4.17-4.13 (m, 1H, H-4), 4.14 (s, 1H, H-1), 4.09-4.06 (m, 1H, H-6), 3.98 (dd, *J*<sub>3'2'</sub> = 9.6 Hz, *J*<sub>3'4'</sub> = 9.6 Hz, 1H, H-3'), 3.89 (s, 1H, H-2), 3.76-3.73 (m, 2H, H-5, H-5'), 3.68 (s, 3H, COOCH<sub>3</sub>), 3.53-3.50 (m, 1H, H-6), 3.49 (dd, *J*<sub>2'3'</sub> = 9.6 Hz, *J*<sub>2'1'</sub> = 3.6 Hz, 1H, H-2'), 3.49-3.48 (m, 1H, H-3), 3.40-3.38 (m, 0.5H, H-4'), 3.37 (d, *J*<sub>4'3'</sub> = 9.6 Hz, 1H, H-4'), 3.31 (s, 3H, -OCH<sub>3</sub>), 2.45 (br, 1H, -OH); <sup>13</sup>C NMR (100 MHz, CDCl<sub>3</sub>, TMS) δ 168.8, 138.8, 138.4, 138.1, 138.0, 137.8, 128.6, 128.6, 128.5, 128.5, 128.5, 128.5, 128.2, 128.2, 128.1, 128.0, 127.9, 127.8, 127.7, 100.4, 97.9, 82.2, 80.0, 79.9, 77.6, 77.3, 75.8, 75.3, 75.1, 74.8, 74.6, 73.5, 71.7, 69.8, 68.5, 68.0, 55.2, 52.5; HRMS (ESI) Calcd for C<sub>49</sub>H<sub>54</sub>O<sub>12</sub>Na [M+Na]<sup>+</sup>: 857.3513, found: 857.3493.

## Table 3

### 3,4-Di-*O*-benzyl-α-D-mannopyranurono-2,6-lacton-1-yl diphenylphosphate (**10**)

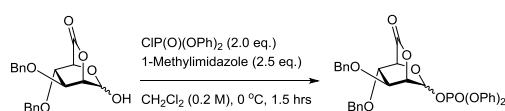

Under Ar atmosphere, to a solution of hemiacetal **S1** (81 mg, 0.23 mmol) and 1-methylimidazole (50 μl, 0.57 mmol) in anhydrous CH<sub>2</sub>Cl<sub>2</sub> (1.1 ml) was added diphenyl chlorophosphate (90 μl, 0.46 mmol) at 0 °C and the mixture was stirred for 1.5 hrs. The reaction was quenched by crashed ice. The mixture was extracted with CH<sub>2</sub>Cl<sub>2</sub>. The combined organic layer was washed with brine, dried over Na<sub>2</sub>SO<sub>4</sub> and concentrated *in vacuo*. The residue was purified by flash column chromatography (10 g, hexane → hexane/EtOAc = 4/1), which gave the title compound **10** as colorless syrup (0.11 g, 83%). For the α-anomer: *R*<sub>f</sub> = 0.62 (Hexane/EtOAc = 2/1, v/v); [α]<sub>D</sub><sup>20</sup> = -41.4 (*c* 0.3, CHCl<sub>3</sub>); <sup>1</sup>H NMR (400 MHz, (CD<sub>3</sub>)<sub>2</sub>CO) δ 7.44-7.27 & 7.25-7.24 (m, 20H, Ar-H), 6.26-6.25 (m, 1H, H-1), 5.22 (s, 1H, H-2), 4.76 (s, 1H, H-5), 4.75 & 4.66 (ABq, *J* = 12.0 Hz, 2H, PhCH<sub>2</sub>), 4.73 & 4.65 (ABq, *J* = 12.0 Hz, 2H, PhCH<sub>2</sub>), 4.06 (s, 1H, H-3), 3.91 (s, 1H, H-4); <sup>13</sup>C NMR (100 MHz, (CD<sub>3</sub>)<sub>2</sub>CO) δ 167.2, 150.6, 150.5, 150.5, 137.6, 137.6, 130.1, 130.0, 128.4, 128.4, 128.2, 128.0, 128.0, 127.9, 125.7, 125.7, 94.6, 94.6, 79.2, 77.3, 76.6, 76.5, 71.8, 70.9; HRMS (ESI) Calcd for C<sub>32</sub>H<sub>29</sub>NaO<sub>9</sub>P [M+Na]<sup>+</sup>: 611.1447, found: 611.1459. For **5baβ**: <sup>1</sup>H NMR (400 MHz, (CD<sub>3</sub>)<sub>2</sub>CO, TMS) δ 7.44-7.24 (m, 20H, Ar-H), 6.25-6.21 (m, 1H, H-1), 5.22 & 5.15 (m, 1H, H-2), 4.81-4.55 (m, 5H, H-5, Ph<sub>2</sub>CH<sub>2</sub>×2), 4.20 & 4.06 (m, 1H, H-3), 3.95 & 3.91 (m, 1H, H-4).

### Procedures for Table 3

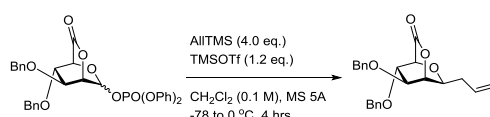

Under Ar atmosphere, to donor **10α** or **10αβ**, AllTMS (4.0 equiv. to **10**) and activated 5 Å molecular sieves was added anhydrous CH<sub>2</sub>Cl<sub>2</sub> (0.46 ml) at room temperature. After stirring for 30 min, TMSOTf (1.2 equiv. to **10**) were added at -78 °C. The mixture was stirred and warmed up to 0 °C over 4 hrs. The reaction was quenched by Et<sub>3</sub>N at 0 °C. The mixture was filtrated through Celite pad and concentrated *in vacuo*. The residue was diluted with CH<sub>2</sub>Cl<sub>2</sub>, and the solution was washed

with water and brine, dried over Na<sub>2</sub>SO<sub>4</sub> and concentrated *in vacuo*, which gave the title compound **11** as colorless oil without further purification.

### 3-(3',4'-Di-*O*-benzyl- $\beta$ -D-mannopyranurono-2',6'-lacton-1-yl)propene (**11**)

$R_f$  = 0.60 (Hexane/EtOAc = 3/1, v/v);  $[\alpha]^{20}_D$  = -11.7 (*c* 0.4, CHCl<sub>3</sub>); <sup>1</sup>H NMR (400 MHz, CDCl<sub>3</sub>, TMS)  $\delta$  7.35-7.29 (m, 10H, Ar-H), 5.78-5.67 (dddd,  $J_{\beta,\gamma trans}$  = 18.0 Hz,  $J_{\beta,\gamma cis}$  = 9.6 Hz,  $J_{\beta,\alpha 1}$  = 8.0 Hz,  $J_{\beta,\alpha 2}$  = 7.6 Hz, 1H, H <sub>$\beta$</sub> ), 5.17 (d,  $J_{\beta,\gamma trans}$  = 18.0 Hz, 1H, H- $\gamma$  trans), 5.16 (d,  $J_{\beta,\gamma cis}$  = 9.6 Hz, 1H, H- $\gamma$  cis), 4.67 (s, 1H, H-2), 4.65 & 4.49 (ABq,  $J$  = 12.6 Hz, 2H, PhCH<sub>2</sub>), 4.65 & 4.48 (ABq,  $J$  = 12.0 Hz, 2H, PhCH<sub>2</sub>), 4.46 (s, 1H, H-5), 3.90 (dd,  $J_{H-1,\alpha 1}$  = 6.8 Hz,  $J_{H-1,\alpha 2}$  = 6.4 Hz, 1H, H-1), 3.82 (s, 1H, H-4), 3.63 (s, 1H, H-3), 2.49-2.42 & 2.36-2.29 (ddd,  $J_{\alpha 1,\alpha 2}$  = 13.2 Hz,  $J_{\alpha 1,\beta}$  = 8.0 Hz,  $J_{\alpha 2,\beta}$  = 7.6 Hz,  $J_{H-1,\alpha 1}$  = 6.8 Hz,  $J_{H-1,\alpha 2}$  = 6.4 Hz, 2H, H <sub>$\alpha 1,\alpha 2$</sub> ); <sup>13</sup>C NMR (100 MHz, CDCl<sub>3</sub>, TMS)  $\delta$  169.0, 136.8, 136.7, 132.1, 128.7, 128.2, 128.0, 119.5, 79.6, 78.9, 75.4, 72.0, 71.2, 70.7, 36.3; HRMS (ESI) Calcd for C<sub>23</sub>H<sub>24</sub>NaO<sub>5</sub> [M+Na]<sup>+</sup>: 403.1521, found: 403.1523. The NOE correlation observed between  $\delta$  3.90 and  $\delta$  3.63 confirmed the stereochemistry at C-1 to be  $\beta$ .

**Table 4**

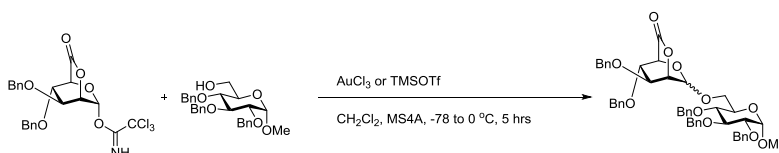

Under Ar atmosphere, to glycosyl imidate **5c $\alpha$** , glycosyl acceptor **6a** (1.2 equiv. to **5c $\alpha$** ) and activated 4 Å molecular sieves in the presence or absence of 1,3-bis[3,5-bis(trifluoromethyl) phenyl]thiourea (0.1 equiv. to **5c $\alpha$** ) was added anhydrous CH<sub>2</sub>Cl<sub>2</sub> at room temperature. After stirring for 30 min, gold (III) chloride or TMSOTf (0.1 equiv. to **5c $\alpha$** ) was added at -78 °C. The mixture was stirred and warmed up to 0 °C over 5 hrs. The reaction was quenched by Et<sub>3</sub>N at 0 °C and diluted with 10 mL of CH<sub>2</sub>Cl<sub>2</sub>. The diluted solution was filtrated through Celite pad and the filtrate was concentrated *in vacuo*. The reaction mixture was analyzed by HPLC (column, Mightysil, RP-18 MS 150-4.6 (5  $\mu$ m); eluent, CH<sub>3</sub>CN/H<sub>2</sub>O = 80/20; flow rate, 1.0 ml/min;  $t_R$   $\alpha$ -mannoside 13.400 min;  $t_R$   $\beta$ -mannoside 12.258 min).

### Scheme S2. Preparations of 2,6-anhydro sugar **12**.

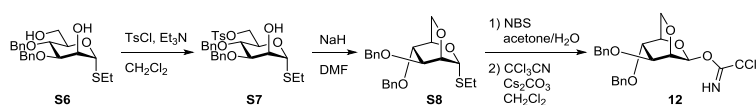

### Ethyl 1-thio-3,4-di-*O*-benzyl-6-*O*-tosyl- $\alpha$ -D-mannopyranoside (**S7**)

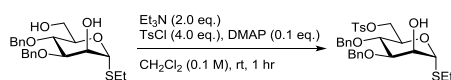

Under Ar atmosphere, to a solution of **S6**<sup>[10]</sup> (47.1 mg, 116.4  $\mu$ mol), TsCl (88.8 mg, 465.7  $\mu$ mol) in anhydrous CH<sub>2</sub>Cl<sub>2</sub> (1.16 ml) was added Et<sub>3</sub>N (32.3  $\mu$ l, 232.9  $\mu$ mol) and DMAP (1.4 mg, 11.6  $\mu$ mol) at room temperature. The mixture was stirred for 1 hr. The mixture was poured into sat. NaHCO<sub>3</sub> aq. and extracted with CH<sub>2</sub>Cl<sub>2</sub>. The organic layer was washed with water and brine, dried over Na<sub>2</sub>SO<sub>4</sub> and concentrated *in vacuo*. The residue was purified by flash column chromatography (7 g, hexane/EtOAc = 2/1), which gave the title compound **S7** as colorless oil (48.0 mg, 74%).  $R_f$  = 0.33 (Hexane/EtOAc = 3/1, v/v);  $[\alpha]^{20}_D$  = +25.1 (*c* 0.4, CHCl<sub>3</sub>); <sup>1</sup>H NMR (400 MHz, CDCl<sub>3</sub>, TMS)  $\delta$  7.78-7.76 (m, 2H, Ar-H), 7.32-7.20 (m, 12H, Ar-H), 5.25 (d,  $J_{1,2}$  = 1.2 Hz, 1H, H-1), 4.83 & 4.48 (ABq,  $J$  = 10.8 Hz, 2H, PhCH<sub>2</sub>), 4.66 & 4.62 (ABq,  $J$  = 11.6 Hz, 2H, PhCH<sub>2</sub>), 4.28-4.22 (m, 2H, H-6, H-6), 4.20-4.16 (m, 1H, H-5), 4.04 (dd,  $J_{2,1}$  = 1.2 Hz,  $J_{2,3}$  = 3.2 Hz, 1H, H-2), 3.79 (dd,  $J_{3,2}$



= 3.2 Hz,  $J_{3,4}$  = 9.2 Hz, 1H, H-3), 3.74 (d,  $J_{4,3}$  = 9.2 Hz, 0.5H, H-4), 3.73-3.70 (m, 0.5H, H-4), 2.63 (m, 1H, -OH), 2.60-2.42 (m, 2H, CH<sub>2</sub>), 2.41 (s, 3H, -CH<sub>3</sub>), 1.24-1.20 (m, 3H, -CH<sub>3</sub>); <sup>13</sup>C NMR (100 MHz, CDCl<sub>3</sub>, TMS) δ 144.8, 137.9, 137.5, 133.0, 129.8, 128.7, 128.5, 128.2, 128.1, 128.1, 128.0, 83.3, 80.4, 75.2, 73.8, 72.1, 69.8, 69.7, 68.9, 24.9, 21.7, 14.8; HRMS (ESI) Calcd for C<sub>29</sub>H<sub>34</sub>NaO<sub>7</sub>S<sub>2</sub> [M+Na]<sup>+</sup>: 581.1644, found: 581.1642.

### Ethyl 1-thio-3,4-di-*O*-benzyl-2,6-anhydro- $\alpha$ -D-mannopyranoside (**S8**)

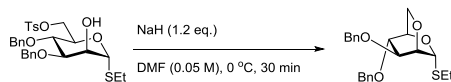

Under Ar atmosphere, to a solution of **S7** (23.4 mg, 41.9  $\mu$ mol) in anhydrous DMF (0.84 ml) was added NaH (2.2 mg, 50.3  $\mu$ mol, 55%) at 0 °C and the mixture was stirred for 30 min. The reaction was quenched by MeOH (1.0 ml). The mixture was poured to water, and extracted with CH<sub>2</sub>Cl<sub>2</sub>. The organic layer was washed with water and brine, dried over Na<sub>2</sub>SO<sub>4</sub> and concentrated *in vacuo*. The residue was purified by column chromatography (7 g, Hexane/EtOAc = 3/1), which gave the title compound **S8** as colorless oil (12.1 mg, 75%).  $R_f$  = 0.44 (Hexane/EtOAc = 2/1, v/v);  $[\alpha]^{20}_D$  = +5.6 (*c* 0.4, CHCl<sub>3</sub>); <sup>1</sup>H NMR (400 MHz, CDCl<sub>3</sub>, TMS) δ 7.37-7.28 (m, 10H, Ar-H), 5.46-5.45 (m, 1H, H-1), 4.63 & 4.51 (ABq,  $J$  = 11.6 Hz, 2H, PhCH<sub>2</sub>), 4.63 & 4.57 (ABq,  $J$  = 12.4 Hz, 2H, PhCH<sub>2</sub>), 4.20-4.17 (m, 0.5H, H-6), 4.18 (d,  $J_{6,6}$  = 10.0 Hz, 0.5H, H-6), 4.07 (s, 1H, H-2), 4.04-4.03 (m, 2H, H-3, H-5), 3.85 (d,  $J_{6,6}$  = 10.0 Hz, 1H, H-6), 3.66 (s, 1H, H-4), 2.74 (q,  $J$  = 7.2 Hz, 2H, CH<sub>2</sub>), 1.32 (t,  $J$  = 7.2 Hz, 3H, CH<sub>3</sub>); <sup>13</sup>C NMR (100 MHz, CDCl<sub>3</sub>, TMS) δ 137.9, 137.7, 128.5, 128.5, 128.2, 128.1, 128.0, 127.8, 83.6, 80.8, 79.2, 71.0, 70.6, 70.4, 69.6, 67.1, 26.5, 15.4; HRMS (ESI) Calcd for C<sub>22</sub>H<sub>26</sub>NaO<sub>4</sub>S [M+Na]<sup>+</sup>: 409.1450, found: 409.1453.

### 3,4-Di-*O*-benzyl-2,6-anhydro- $\beta$ -D-mannopyranosyl trichloroacetimidate (**12**)

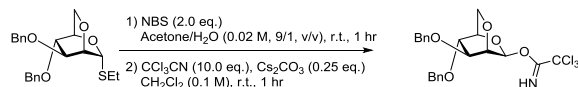

To a solution of **S8** (78.7 mg, 196.4  $\mu$ mol) in acetone (42.4 ml) and H<sub>2</sub>O (4.7 ml) was added NBS (0.34 g, 1.88 mmol) at room temperature and the mixture was stirred for 1 hr. After the TLC analysis showed the completion of reaction, the reaction was quenched by 10% Na<sub>2</sub>S<sub>2</sub>O<sub>3</sub> aq. The mixture was extracted with CH<sub>2</sub>Cl<sub>2</sub>, and the organic layer was washed with water and brine, dried over Na<sub>2</sub>SO<sub>4</sub> and concentrated *in vacuo*. Under Ar atmosphere, to a solution of the crude product and CCl<sub>3</sub>CN (0.94 ml, 9.42 mmol) in anhydrous CH<sub>2</sub>Cl<sub>2</sub> (9.4 ml) was added Cs<sub>2</sub>CO<sub>3</sub> (83.1 mg, 235.6  $\mu$ mol) at room temperature. After the TLC analysis showed the completion of reaction, the reaction mixture was filtrated through Celite pad. The filtrate was concentrated *in vacuo*. The residue was purified by open column chromatography (20 g, Hexane/EtOAc = 3/1), which gave the title compound **12** (84.5 mg, 18% in 2 steps) as colorless oil.  $R_f$  = 0.38 (Hexane/EtOAc = 3/1, v/v);  $[\alpha]^{20}_D$  = +43.2 (*c* 0.3, CHCl<sub>3</sub>); <sup>1</sup>H NMR (400 MHz, CDCl<sub>3</sub>, TMS) δ 8.56 (s, 1H, -NH), 7.37-7.31 (m, 10H, Ar-H), 6.17 (s, 1H, H-1), 4.69 & 4.58 (ABq,  $J$  = 11.8 Hz, 2H, PhCH<sub>2</sub>), 4.66 & 4.55 (ABq,  $J$  = 11.6 Hz, 2H, PhCH<sub>2</sub>), 4.31 (s, 1H, H-2), 4.23 (s, 1H, H-5), 3.91-3.89 (m, 1H, H-6), 3.82 (s, 1H, H-4), 3.79 (s, 1H, H-3), 3.34 (s, 3H, -OMe), 3.24-3.20 (m, 1H, H-4); <sup>13</sup>C NMR (100 MHz, CDCl<sub>3</sub>, TMS) δ 161.1, 137.5, 137.4, 128.7, 128.6, 128.6, 128.1, 128.1, 97.5, 80.9, 80.1, 71.1, 70.9, 69.9, 68.0, 67.0; HRMS (ESI) Calcd for C<sub>22</sub>H<sub>22</sub>Cl<sub>3</sub>NNaO<sub>5</sub> [M+Na]<sup>+</sup>: 508.0461, found: 508.0475. The NOE correlation observed between δ 6.17 and δ 3.79 confirmed the stereochemistry at C-1 to be  $\beta$ .

### References

- [1] Winnik, M. F.; Carver, P. J.; Krepinsky, J. J. *J. Org. Chem.* **1982**, *47*, 2701-2707.
- [2] Pekari, K.; Tailler, D.; Weingart, R.; Schmidt, R. R. *J. Org. Chem.* **2001**, *66*, 7432-7442.
- [3] Fei, C. P.; Chan, T. H. *Tetrahedron Lett.* **1987**, *28*, 849-852.

- [4] Agarwal, A.; Vanlar, Y. D. *Carbohydr. Res.* **2005**, *340*, 1661-1667.
- [5] van Summeren, R. P.; Feringa, B. L.; Minnaard, A. J. *Org. Biomol. Chem.* **2005**, *3*, 2524-2533.
- [6] Tanaka, K.; Fujii, Y.; Tokimoto, H.; Mori, Y.; Tanaka, S.; Bao, G.; Siwu, E. R. O.; Nakayabu, A.; Fukase, K. *Chem. Asian J.* **2009**, *4*, 574-580.
- [7] Wang, C.; Lee, J. Luo, S.; Fan, H.; Pai, C.; Yang, W.; Lu, L.; Hung, S. *Angew. Chem. Int. Ed.* **2002**, *41*, 2360-2362.
- [8] Dasgupta, F.; Anderson, L. *Carbohydr. Res.* **1990**, *202*, 239-255.
- [9] Zhu, X.; D, P.; Cai, M. *Tetrahedron. Asymmetry* **1996**, *7*, 2833-2838.
- [10] Verduyn, R.; Beliën, J. J. A.; Dreef-Tromp, C. M.; van der Marel, G. A. *Tetrahedron Lett.* **1991**, *32*, 6637-6640.

Allyl 3-*O*-benzyl- $\alpha$ -D-mannopyranoside (**2**)<sup>[2]</sup> <sup>1</sup>H NMR (400 MHz, CDCl<sub>3</sub>)

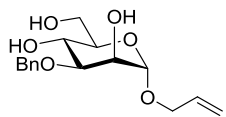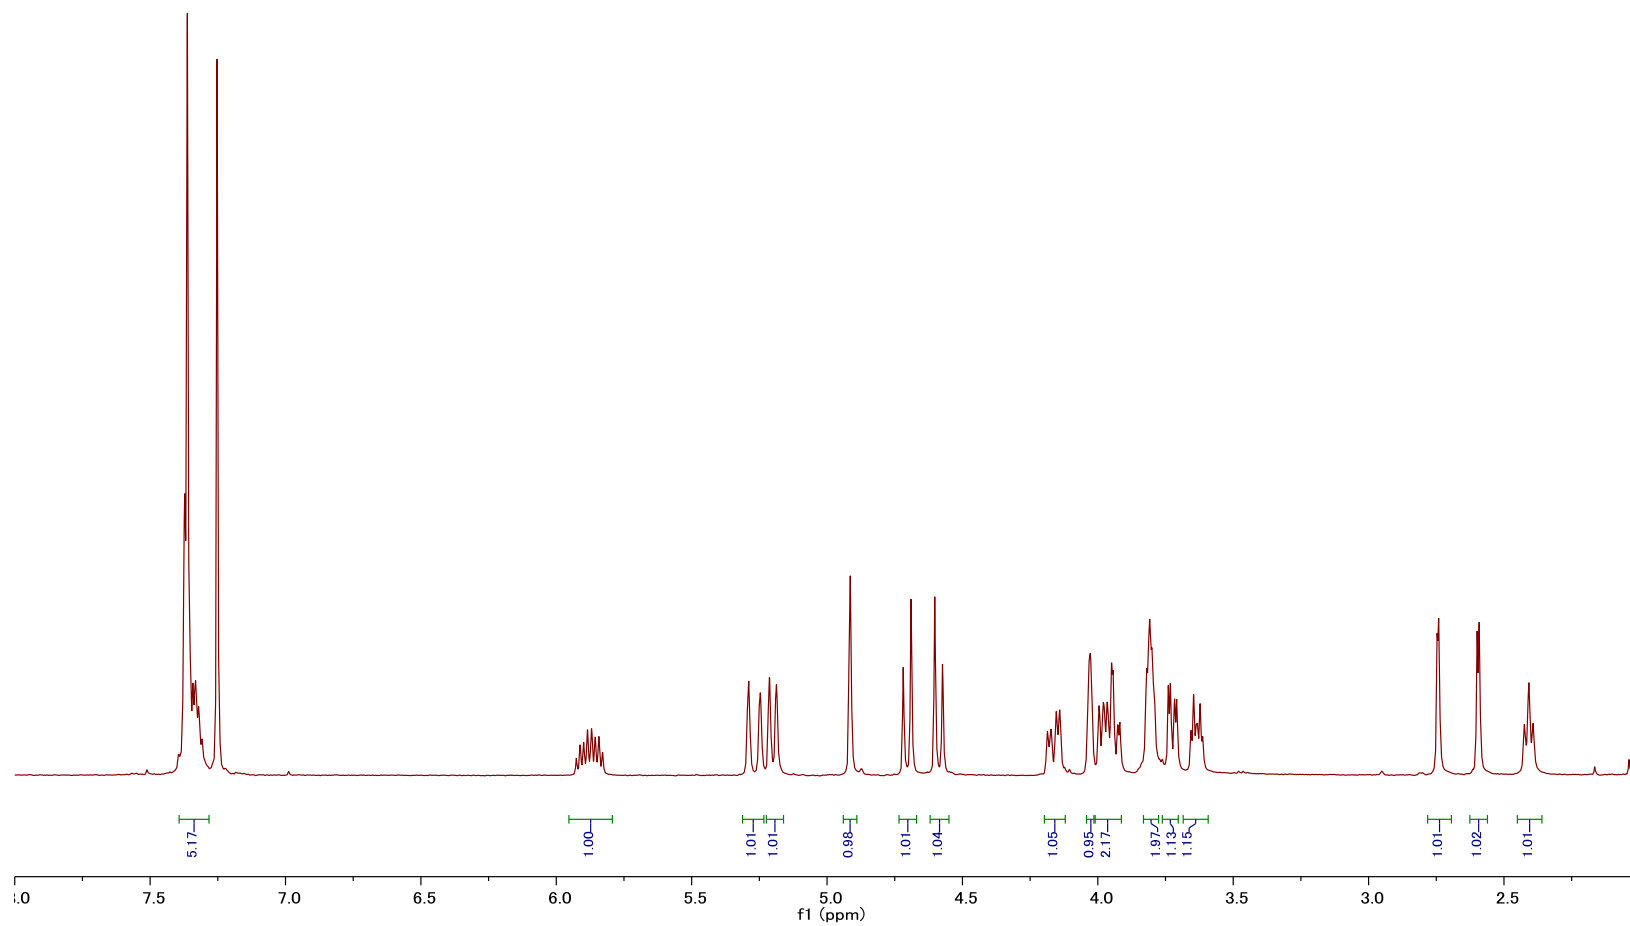

Allyl 3-*O*-benzyl- $\alpha$ -D-mannopyranurono-2,6-lactone (**3**)  $^1\text{H}$  NMR (400 MHz,  $\text{CDCl}_3$ )

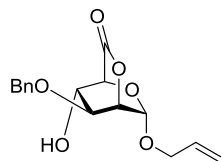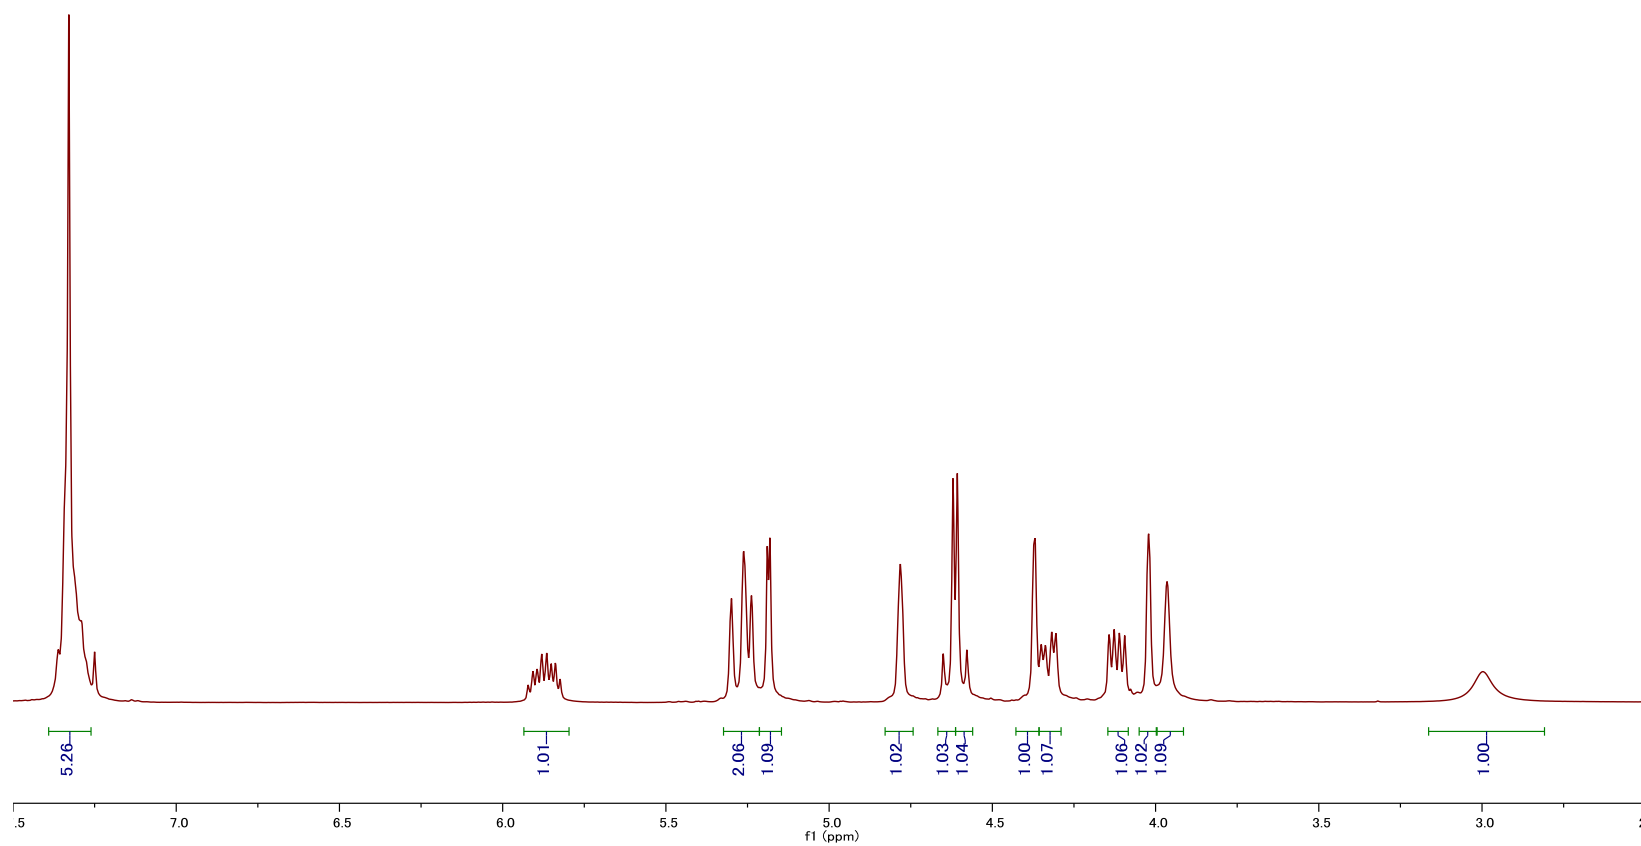

Allyl 3-*O*-benzyl- $\alpha$ -D-mannopyranurono-2,6-lactone (**3**)  $^{13}\text{C}$  NMR (100 MHz,  $\text{CDCl}_3$ )

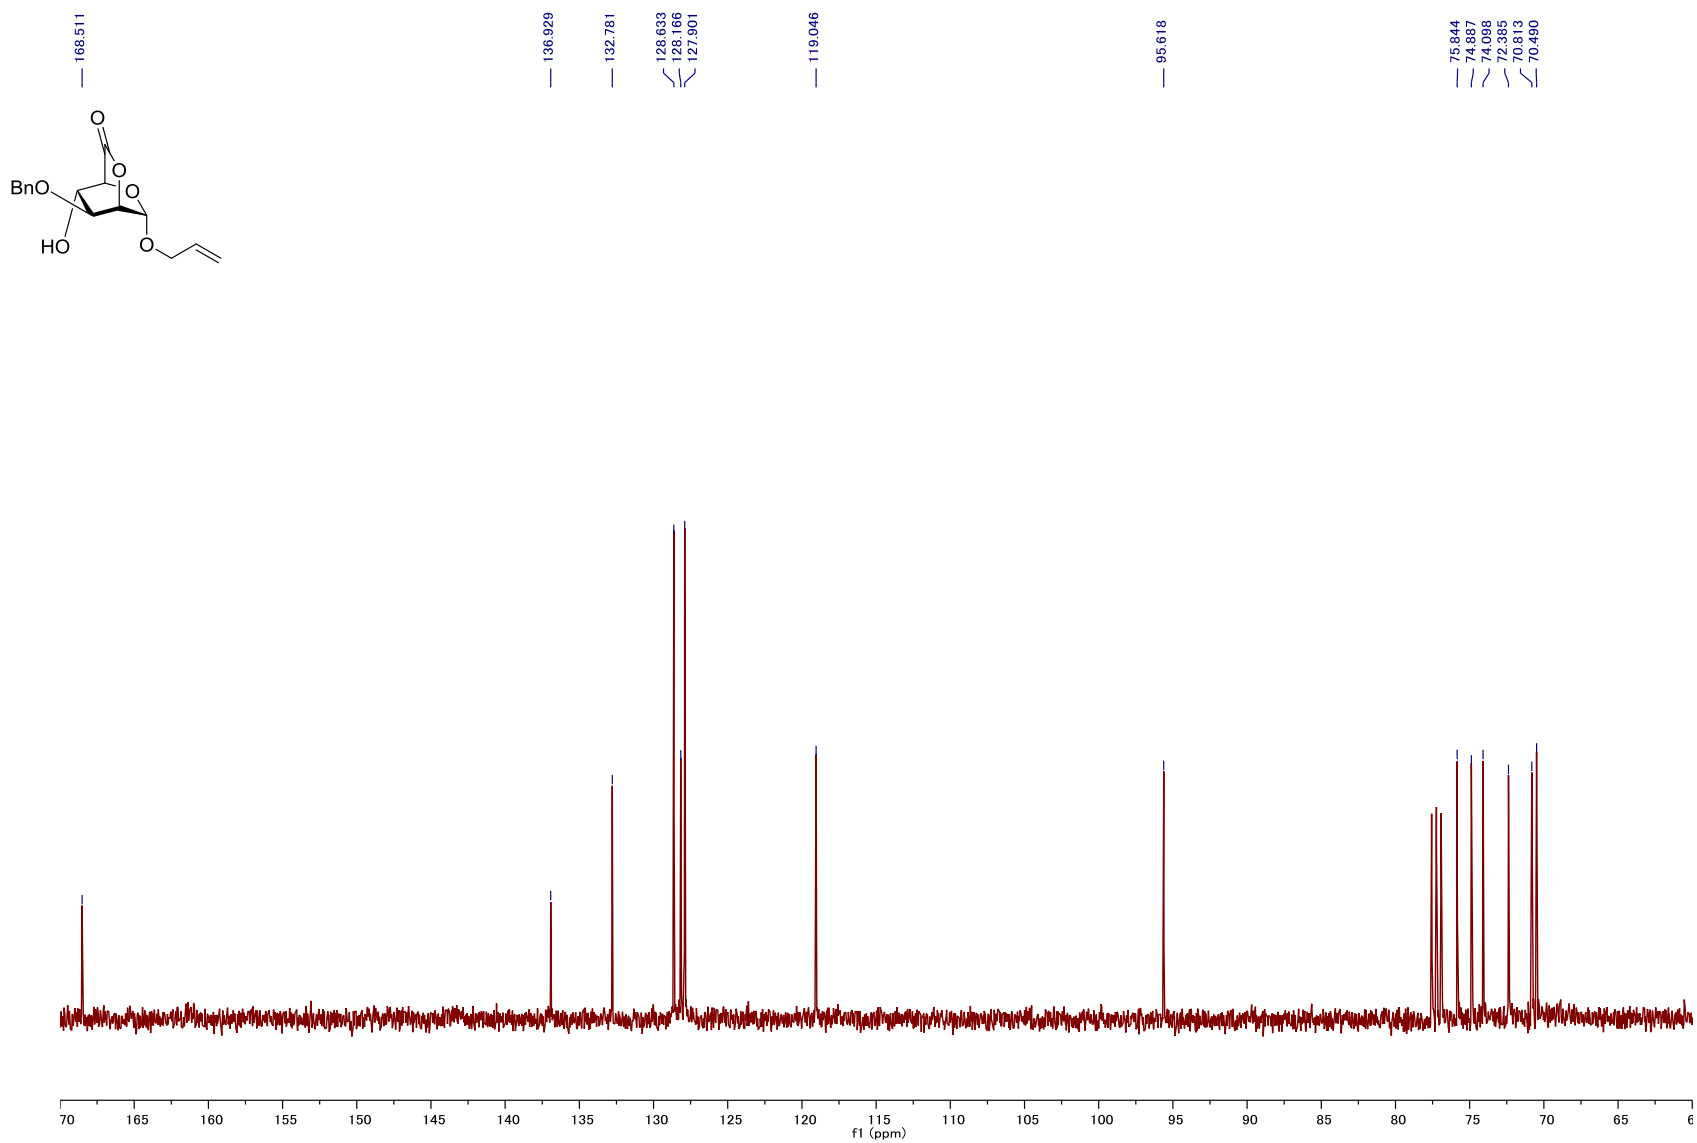

Allyl 3,4-di-*O*-benzyl- $\alpha$ -D-mannopyranurono-2,6-lacton (**4a**)  $^1\text{H}$  NMR (400 MHz,  $\text{CDCl}_3$ )

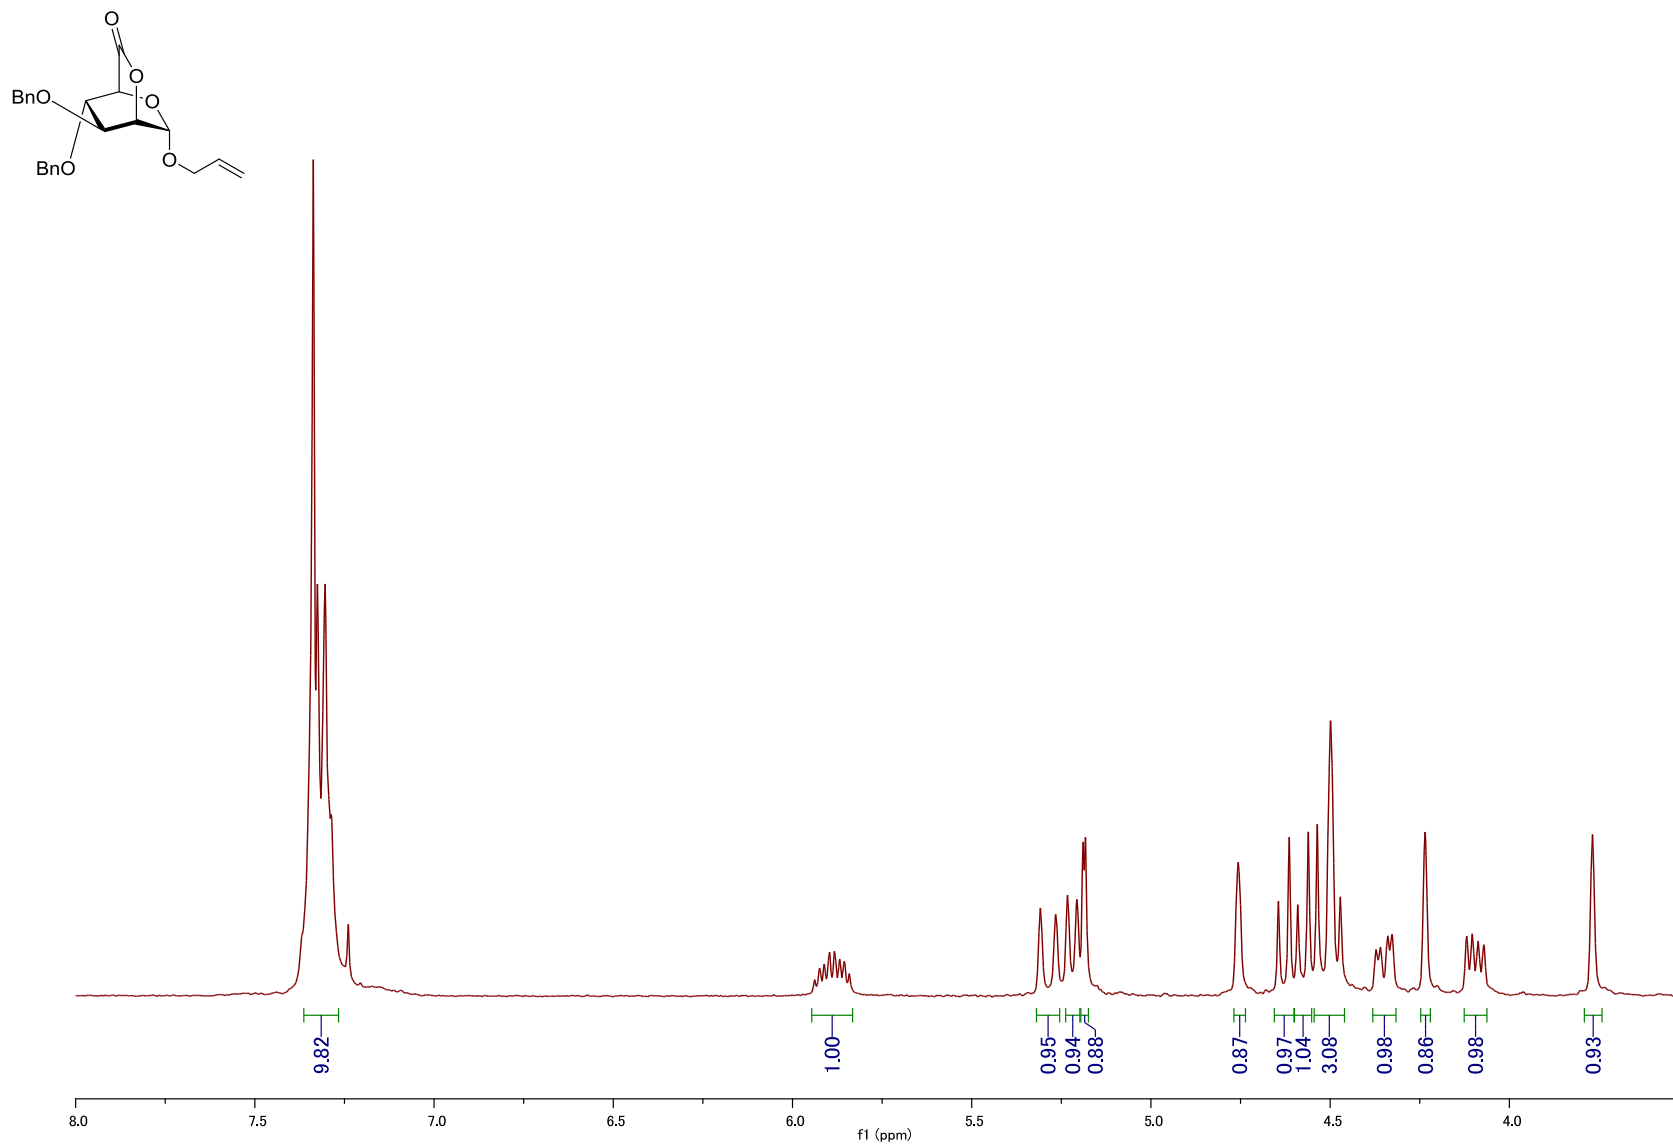

**Allyl 3,4-di-*O*-benzyl- $\alpha$ -D-mannopyranurono-2,6-lacton (4a)**  $^{13}\text{C}$  NMR (100 MHz,  $\text{CDCl}_3$ )

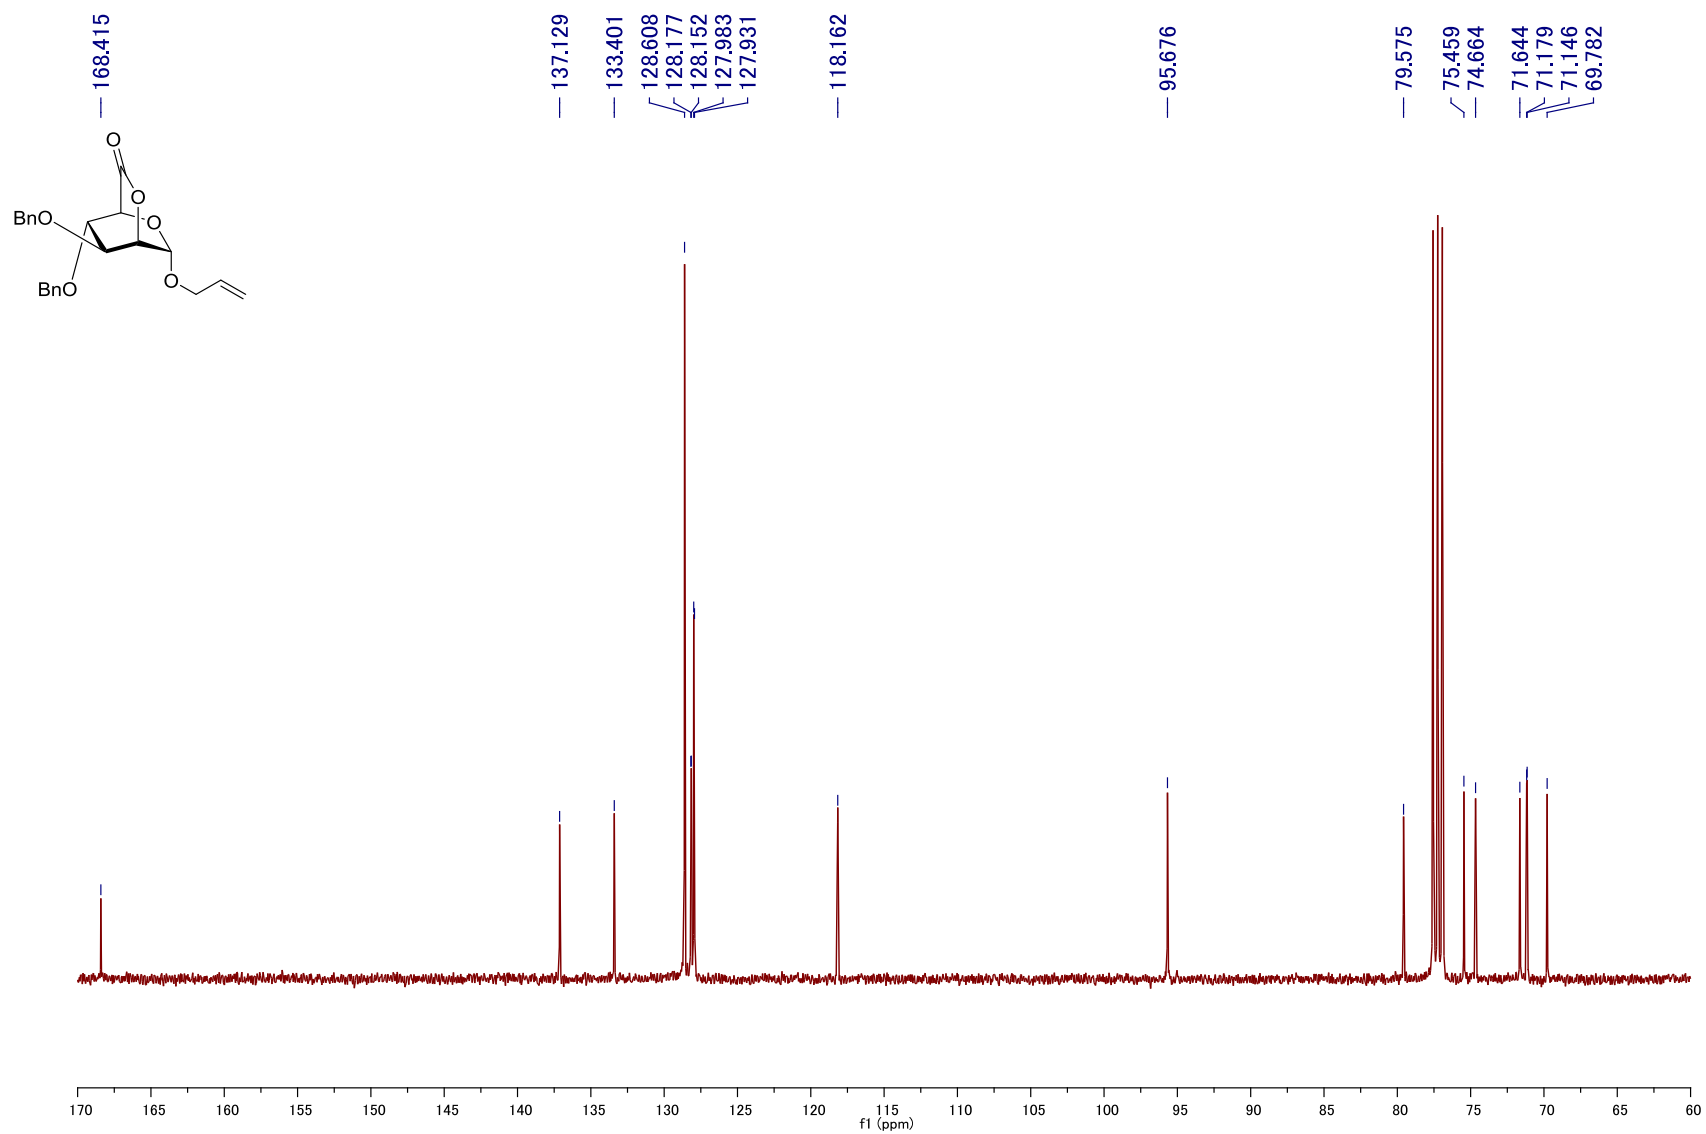

Allyl 3-*O*-benzyl-4-*O*-*tert*-butyldimethylsilyl- $\alpha$ -D-mannopyranurono-2,6-lactone (**4b**)  $^1\text{H}$  NMR (400 MHz,  $\text{CDCl}_3$ )

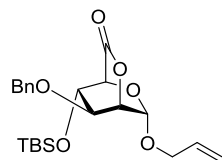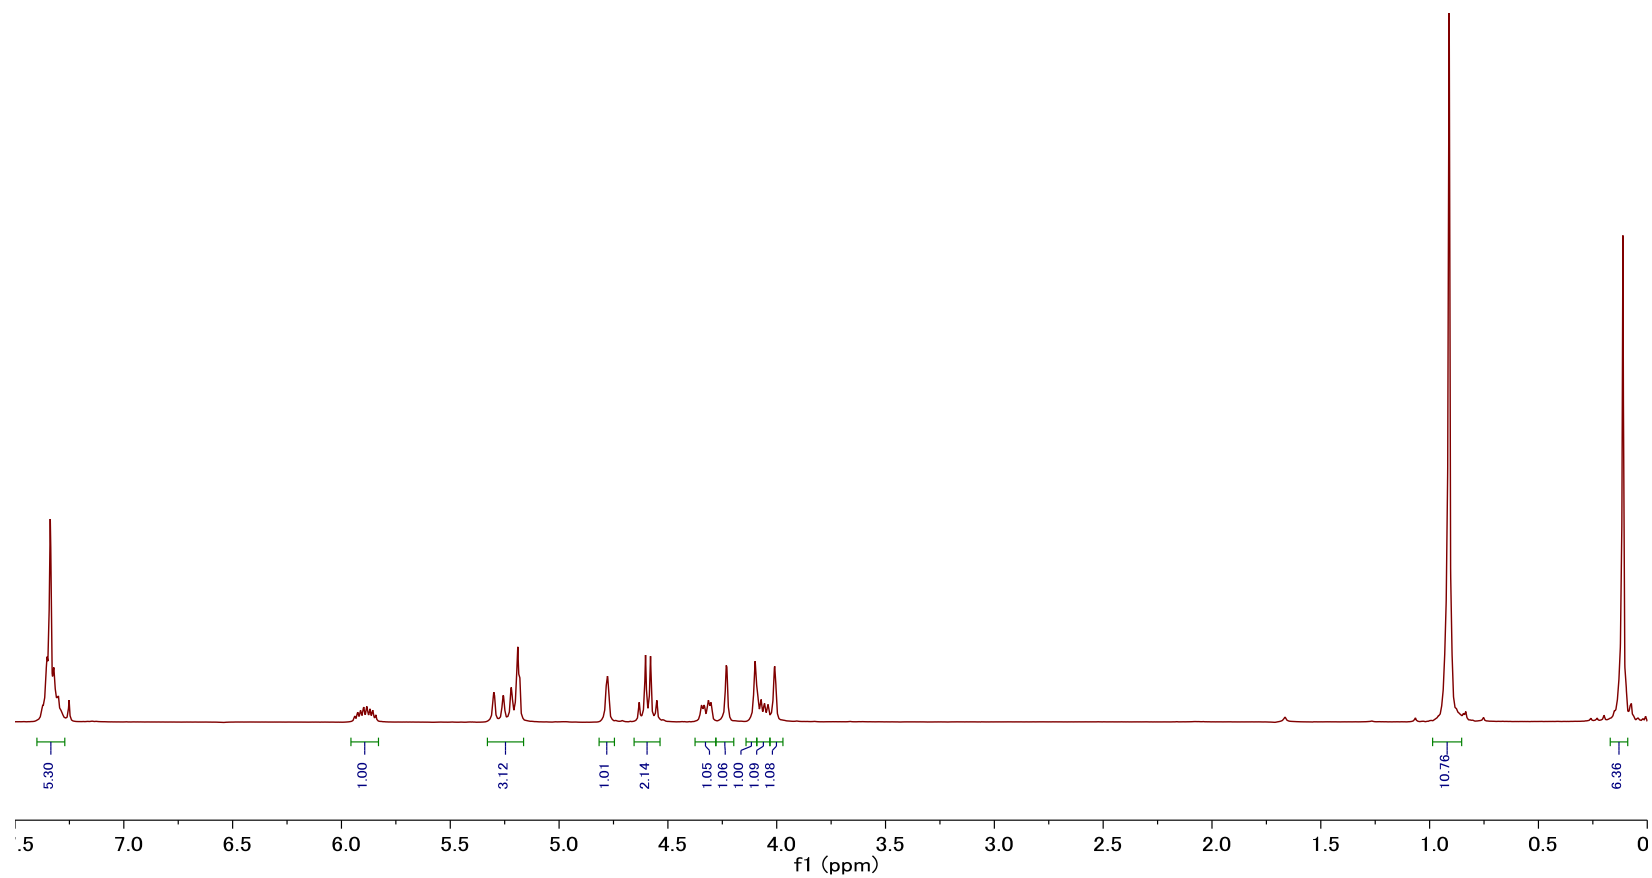



Allyl 3-*O*-benzyl-4-*O*-*tert*-butyldimethylsilyl- $\alpha$ -D-mannopyranurono-2,6-lactone (**4b**)  $^{13}\text{C}$  NMR (100 MHz,  $\text{CDCl}_3$ )

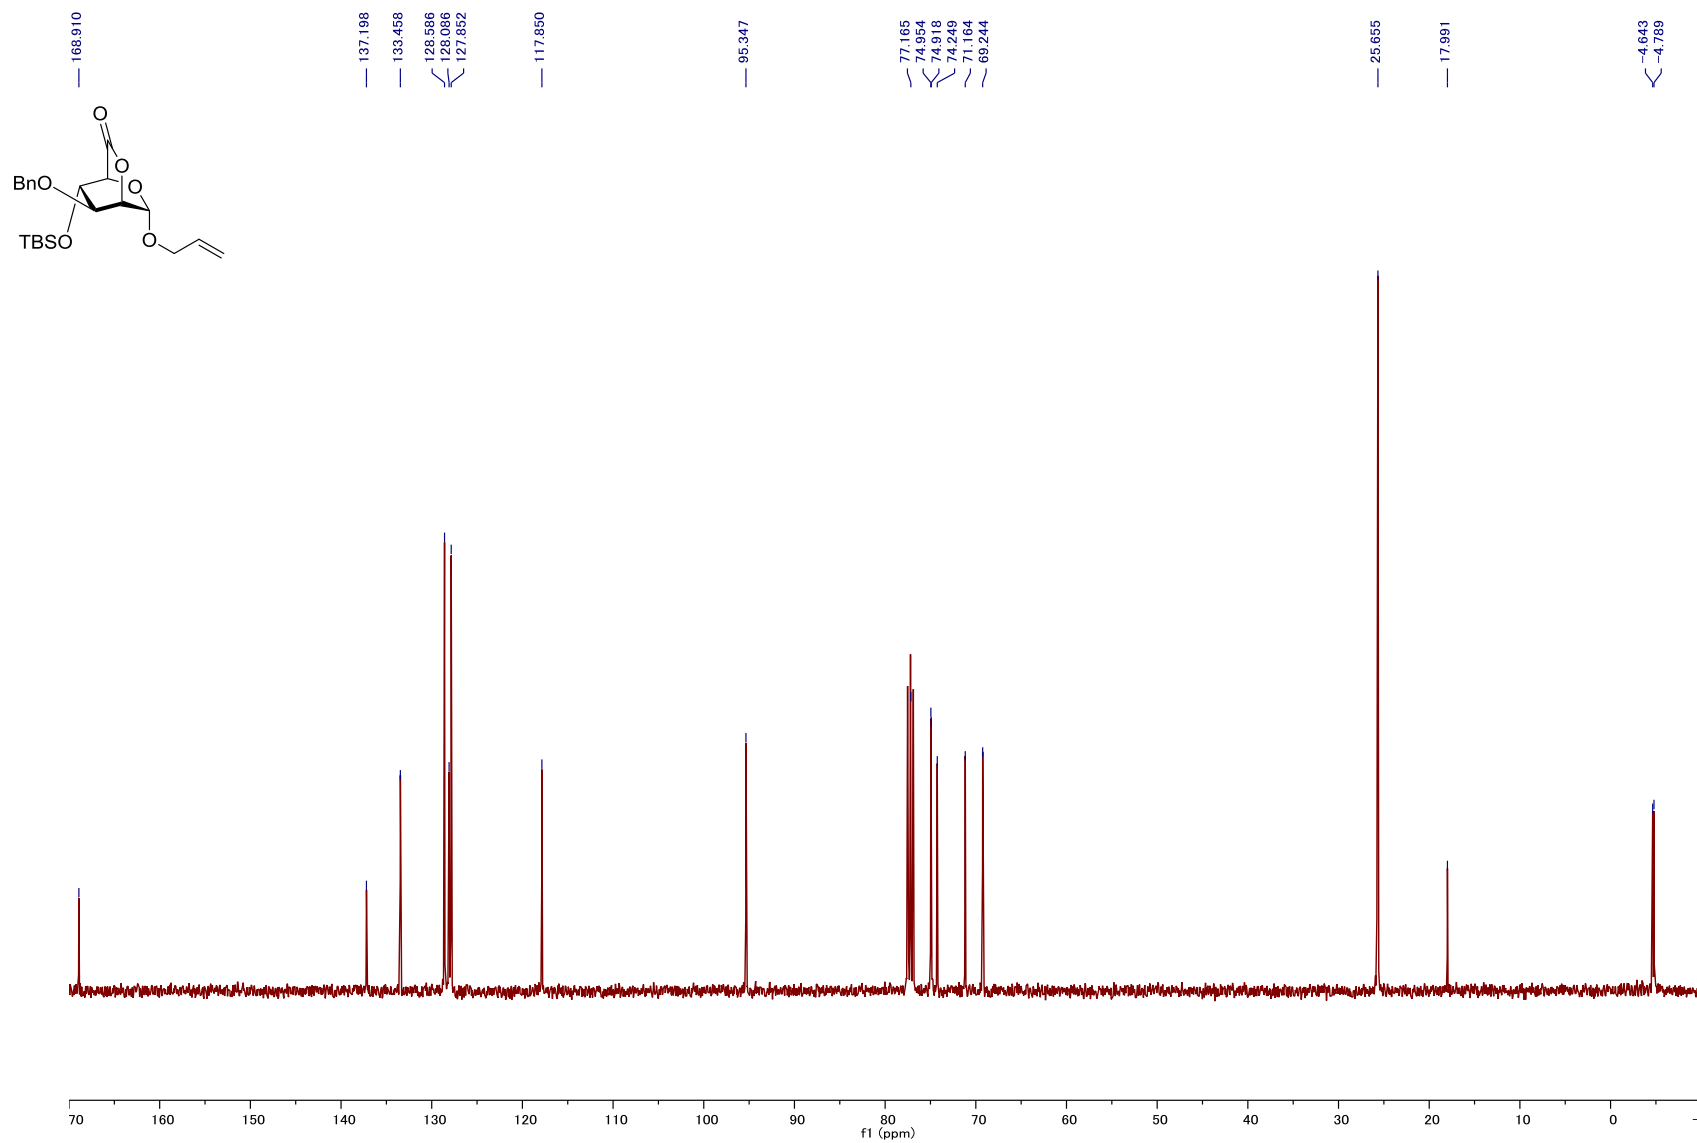

**3,4-Di-*O*-benzyl-D-mannopyranurono-2,6-lactone (S1)**  $^1\text{H}$  NMR (400 MHz,  $\text{CDCl}_3$ )

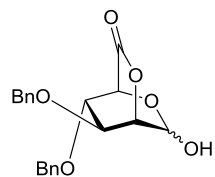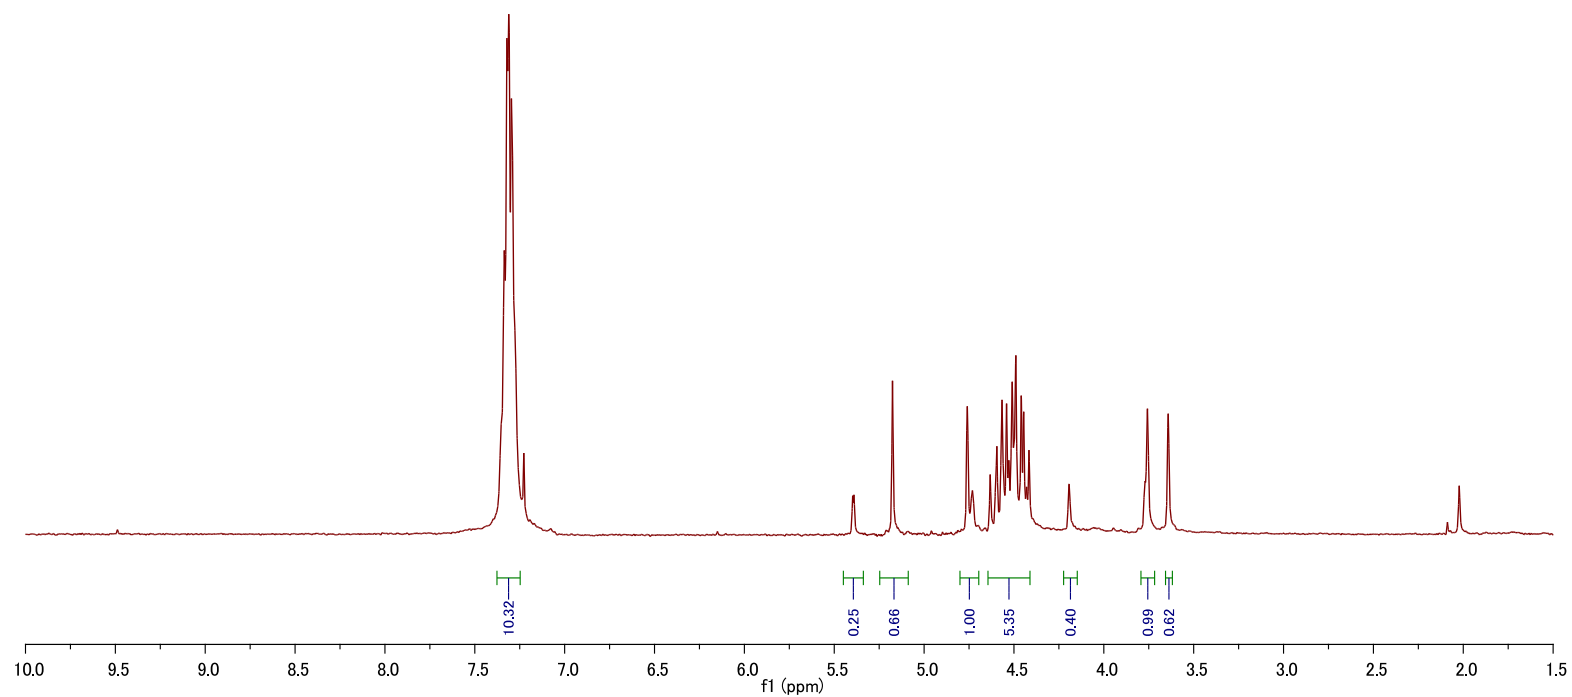

**3,4-Di-*O*-benzyl-D-mannopyranurono-2,6-lactone (S1)**  $^{13}\text{C}$  NMR (100 MHz,  $\text{CDCl}_3$ )

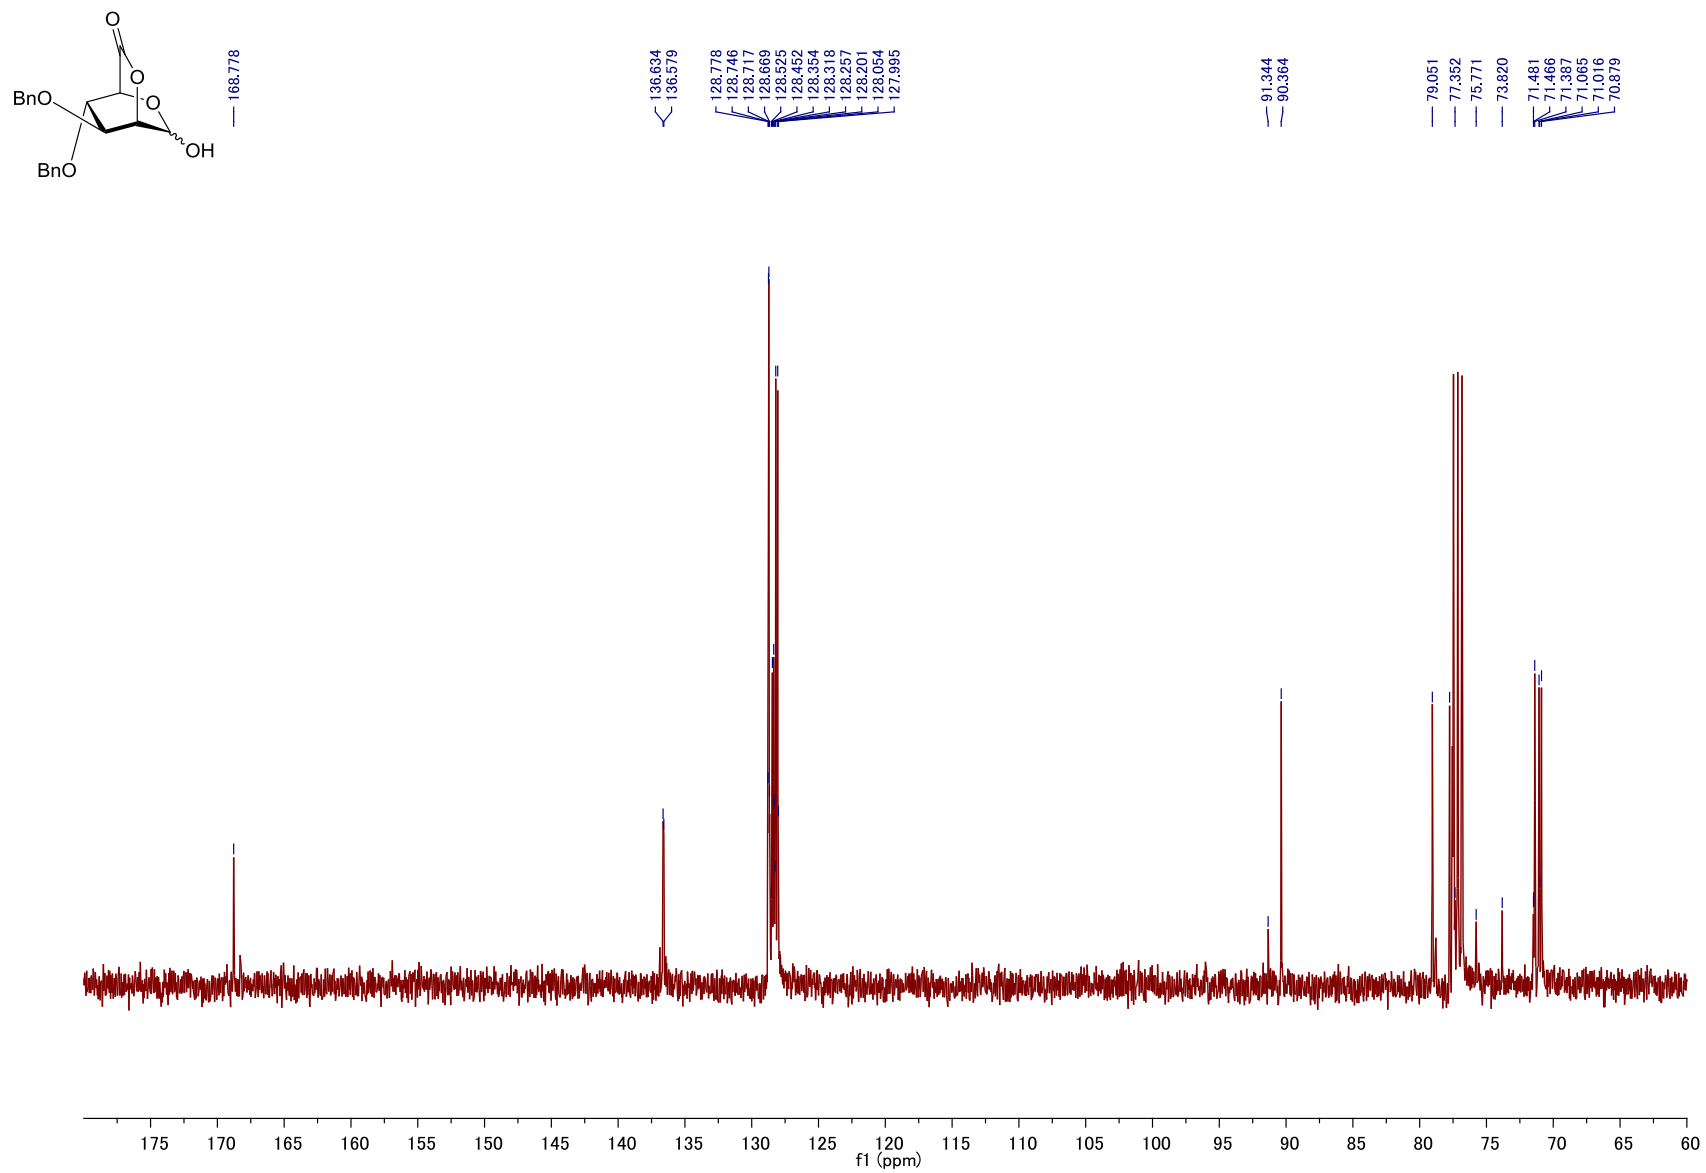

**3,4-Di-*O*-benzyl- $\alpha$ -D-mannopyranurono-2,6-lacton-1-yl diethylphosphite (**5a**)**  $^1\text{H}$  NMR (400 MHz,  $\text{CDCl}_3$ )

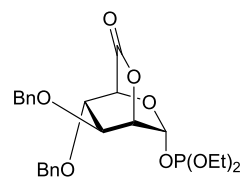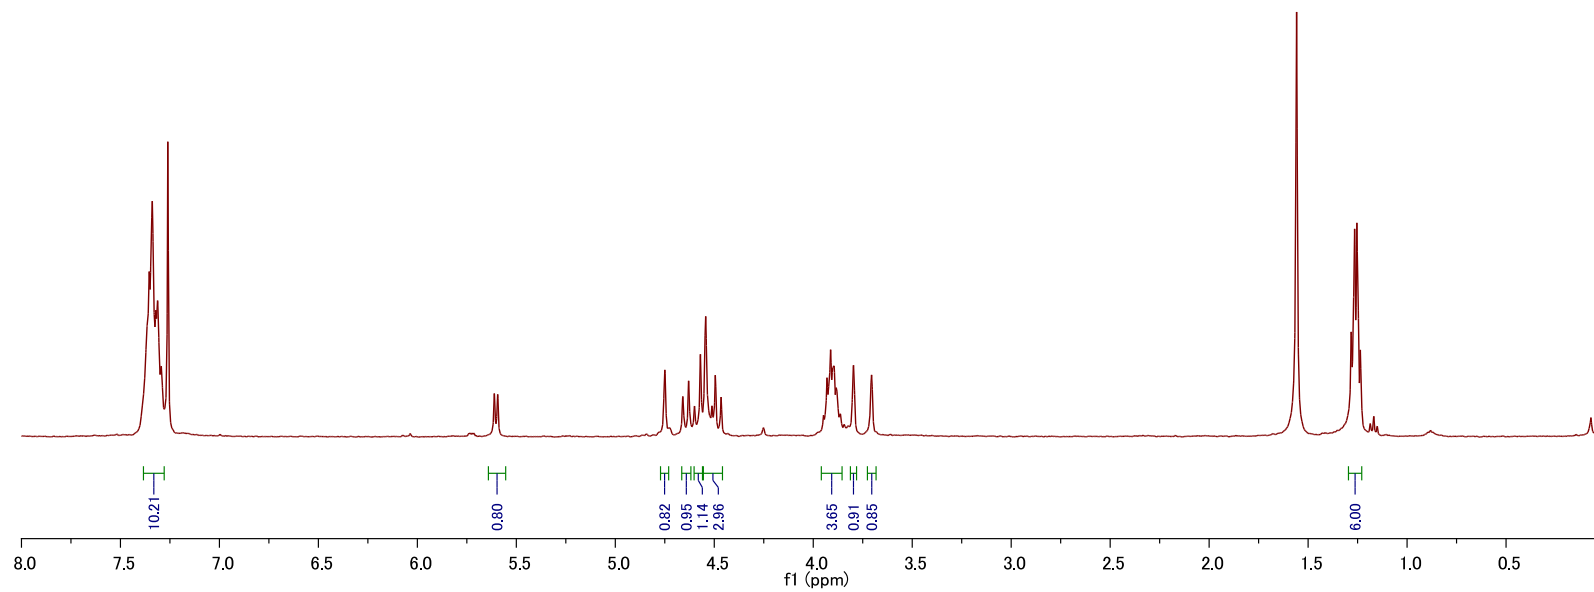

**3,4-Di-*O*-benzyl- $\alpha$ -D-mannopyranurono-2,6-lacton-1-yl diethylphosphite (**5a**)**  $^{13}\text{C}$  NMR (100 MHz,  $\text{CDCl}_3$ )

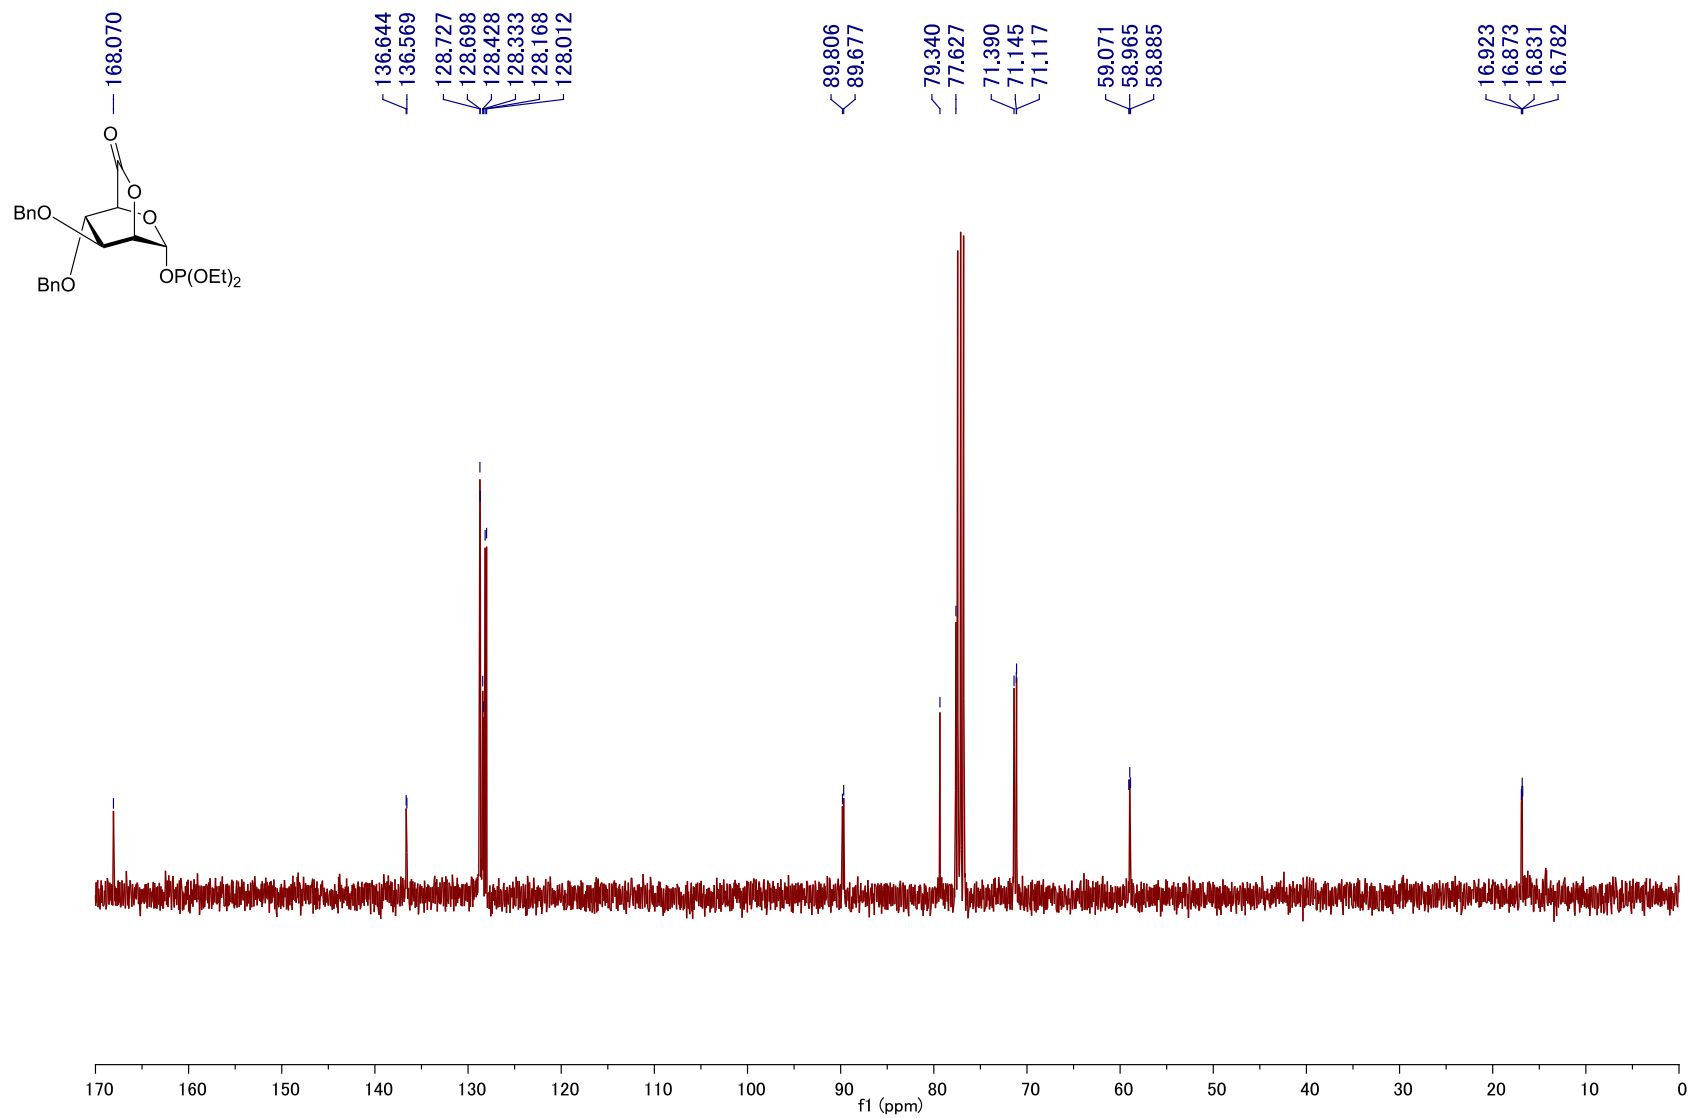

**3,4-Di-*O*-benzyl- $\alpha$ -D-mannopyranurono-2,6-lacton-1-yl iodide (**5b $\alpha$** )**  $^1\text{H}$  NMR (400 MHz,  $\text{CDCl}_3$ )

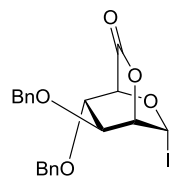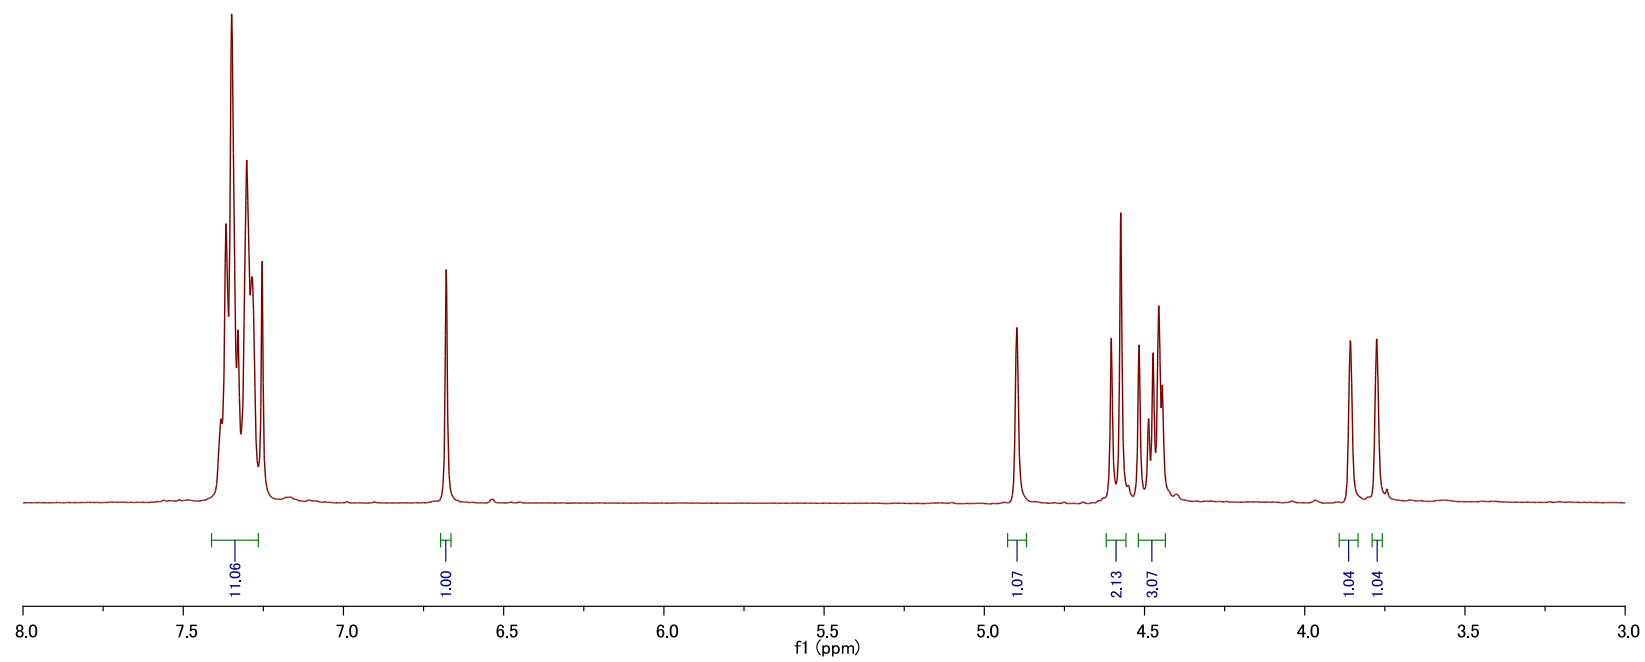

**3,4-Di-*O*-benzyl- $\alpha$ -D-mannopyranurono-2,6-lacton-1-yl iodide (**5b $\alpha\beta$** )**  $^1\text{H}$  NMR (400 MHz,  $\text{CDCl}_3$ )

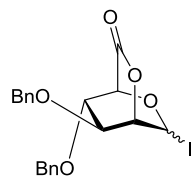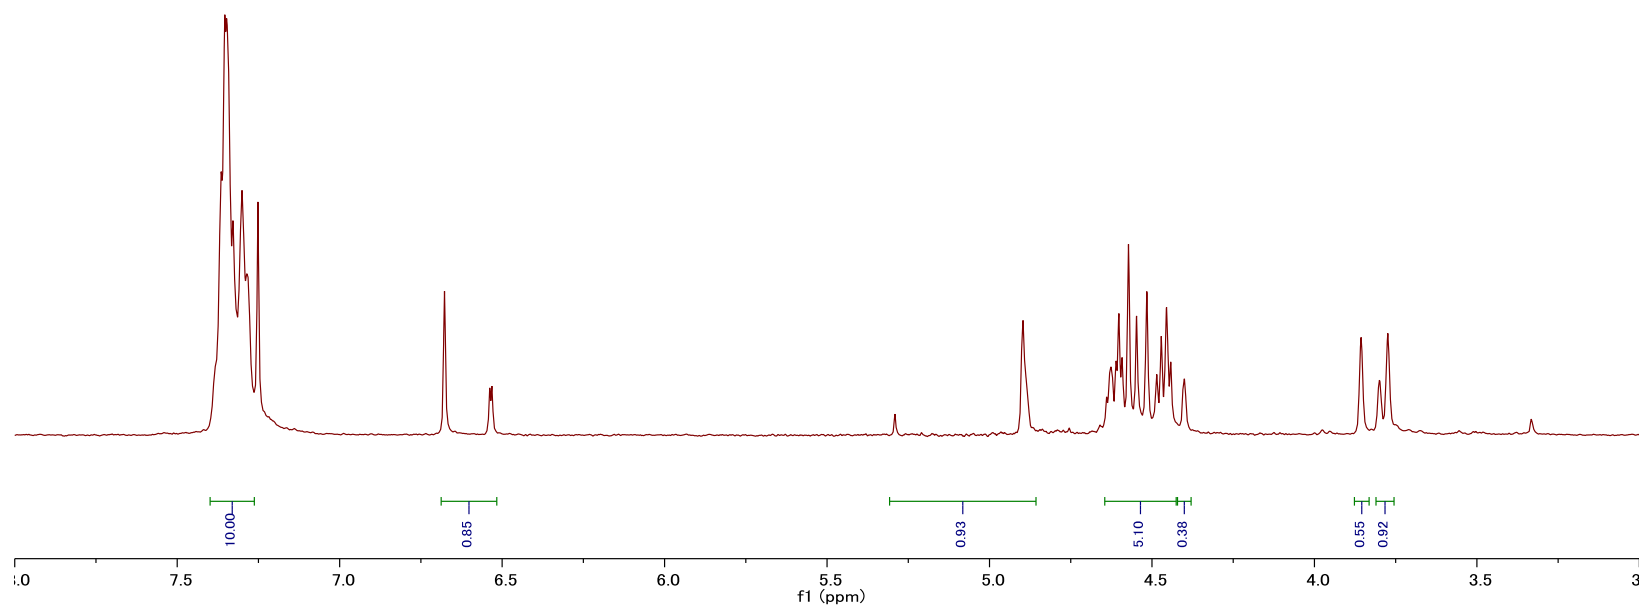

**3,4-Di-*O*-benzyl- $\alpha$ -D-mannopyranurono-2,6-lacton-1-yl iodide (**5b**)**  $^{13}\text{C}$  NMR (100 MHz,  $\text{CDCl}_3$ )

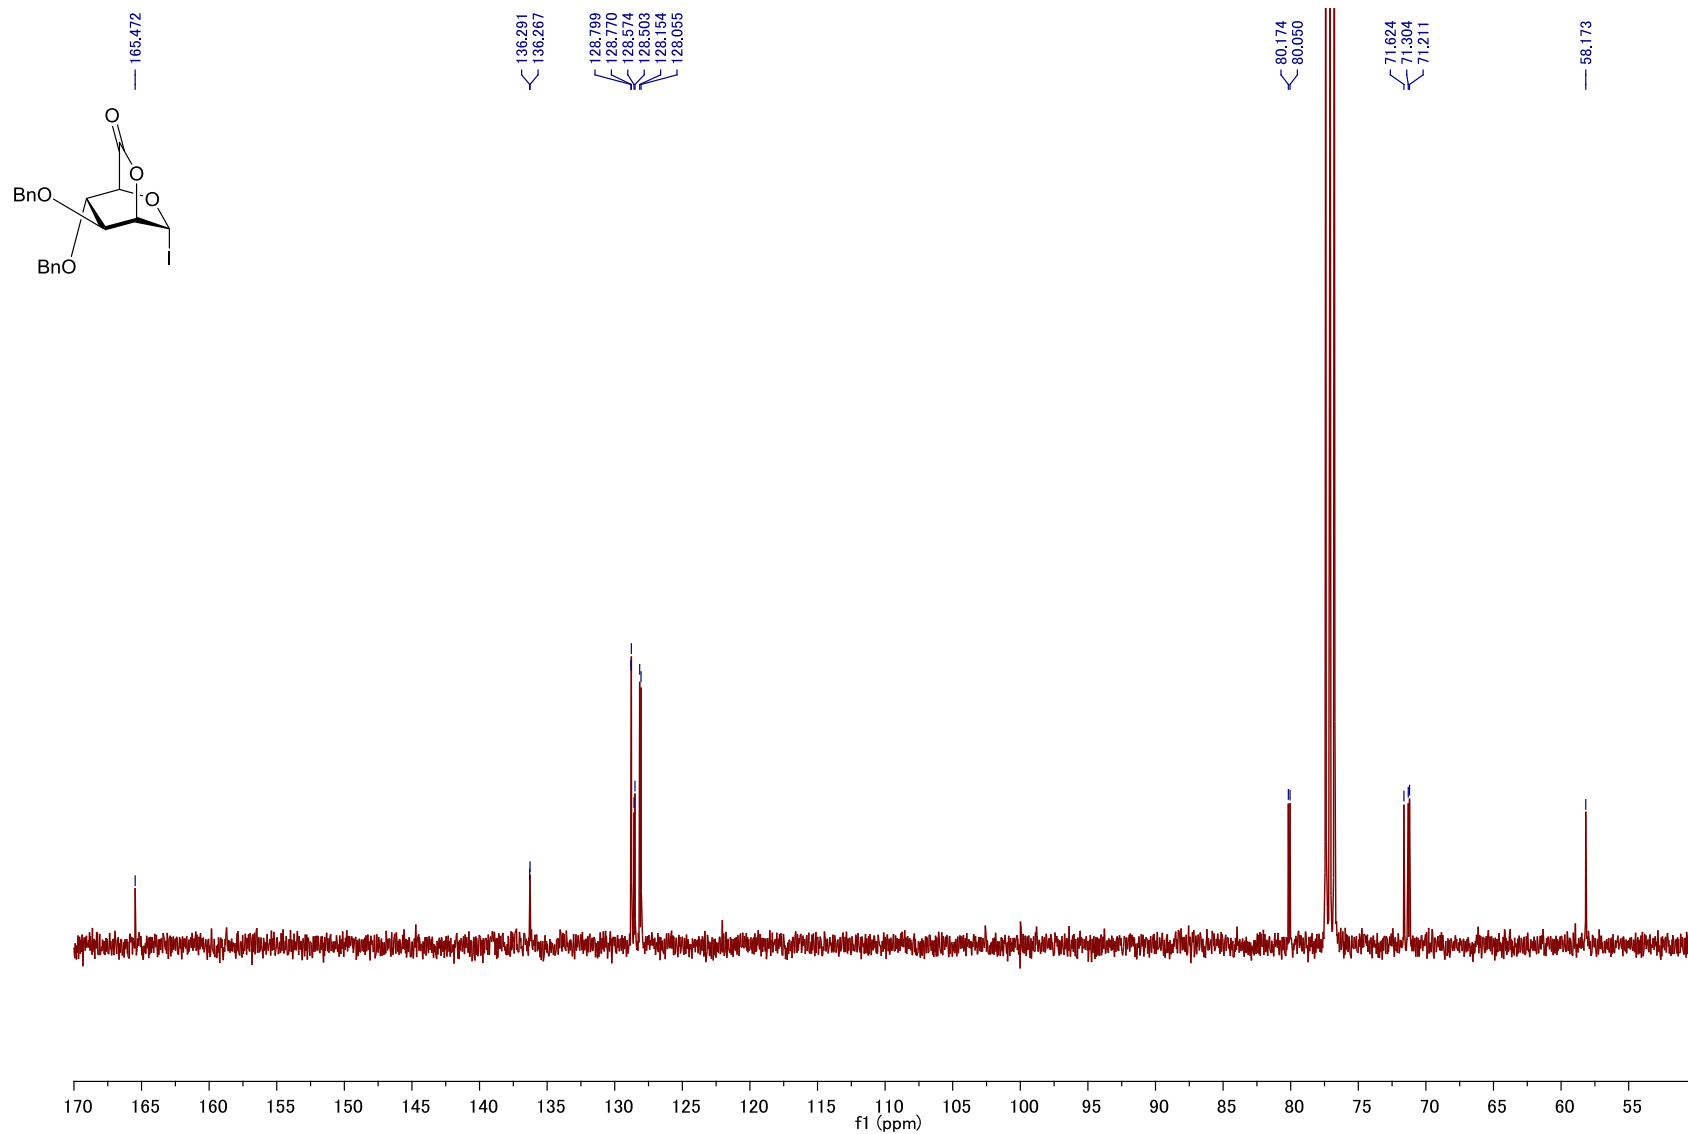



**3,4-Di-*O*-benzyl- $\alpha$ -D-mannopyranurono-2,6-lactone-1-yl-trichloroacetimidate (**5c $\alpha$** )**  $^1\text{H}$  NMR (400 MHz,  $\text{CDCl}_3$ )

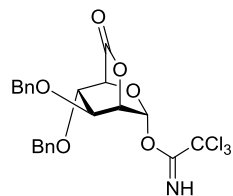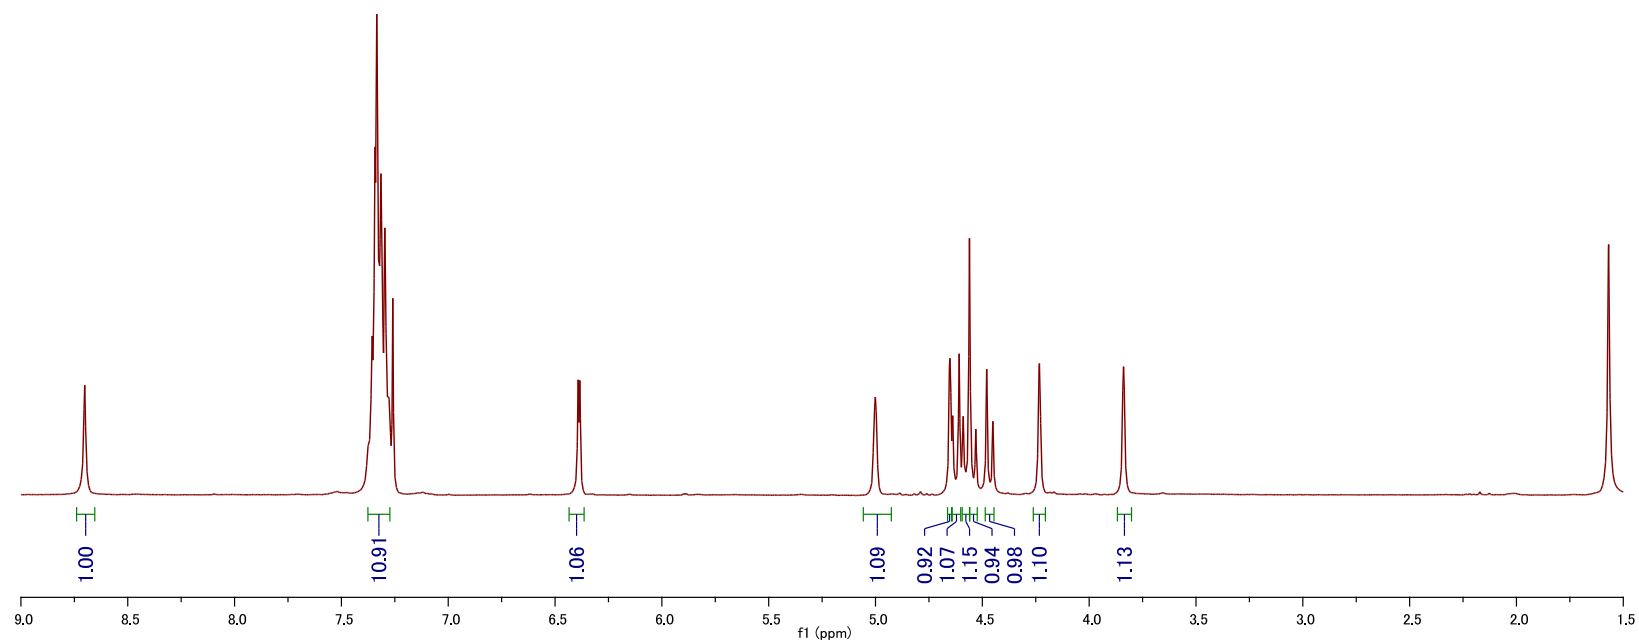

**3,4-Di-*O*-benzyl- $\alpha$ -D-mannopyranurono-2,6-lactone-1-yl-trichloroacetimidate (5c $\alpha$ )**  $^{13}\text{C}$  NMR (100 MHz,  $\text{CDCl}_3$ )

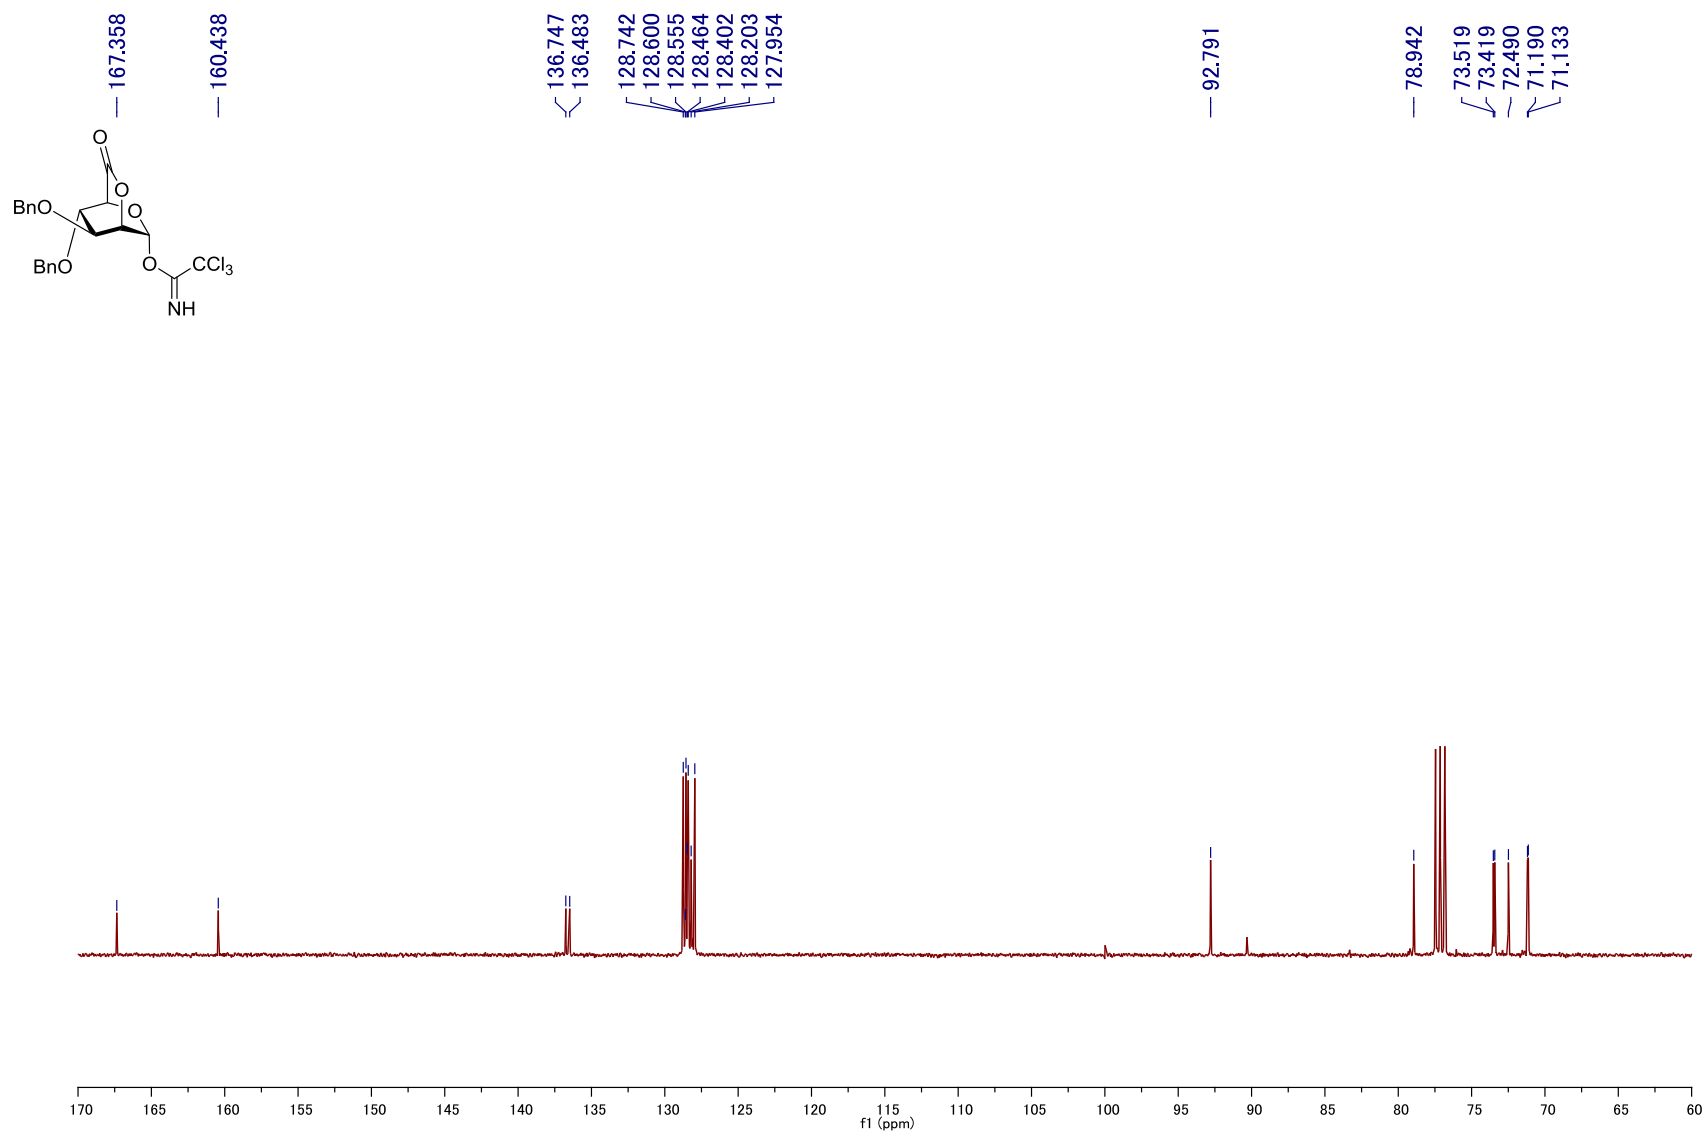

**3,4-Di-*O*-benzyl- $\beta$ -D-mannopyranurono-2,6-lactone-1-yl trichloroacetimidate (5c $\beta$ )**  $^1\text{H}$  NMR (400 MHz,  $\text{CDCl}_3$ )

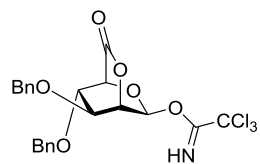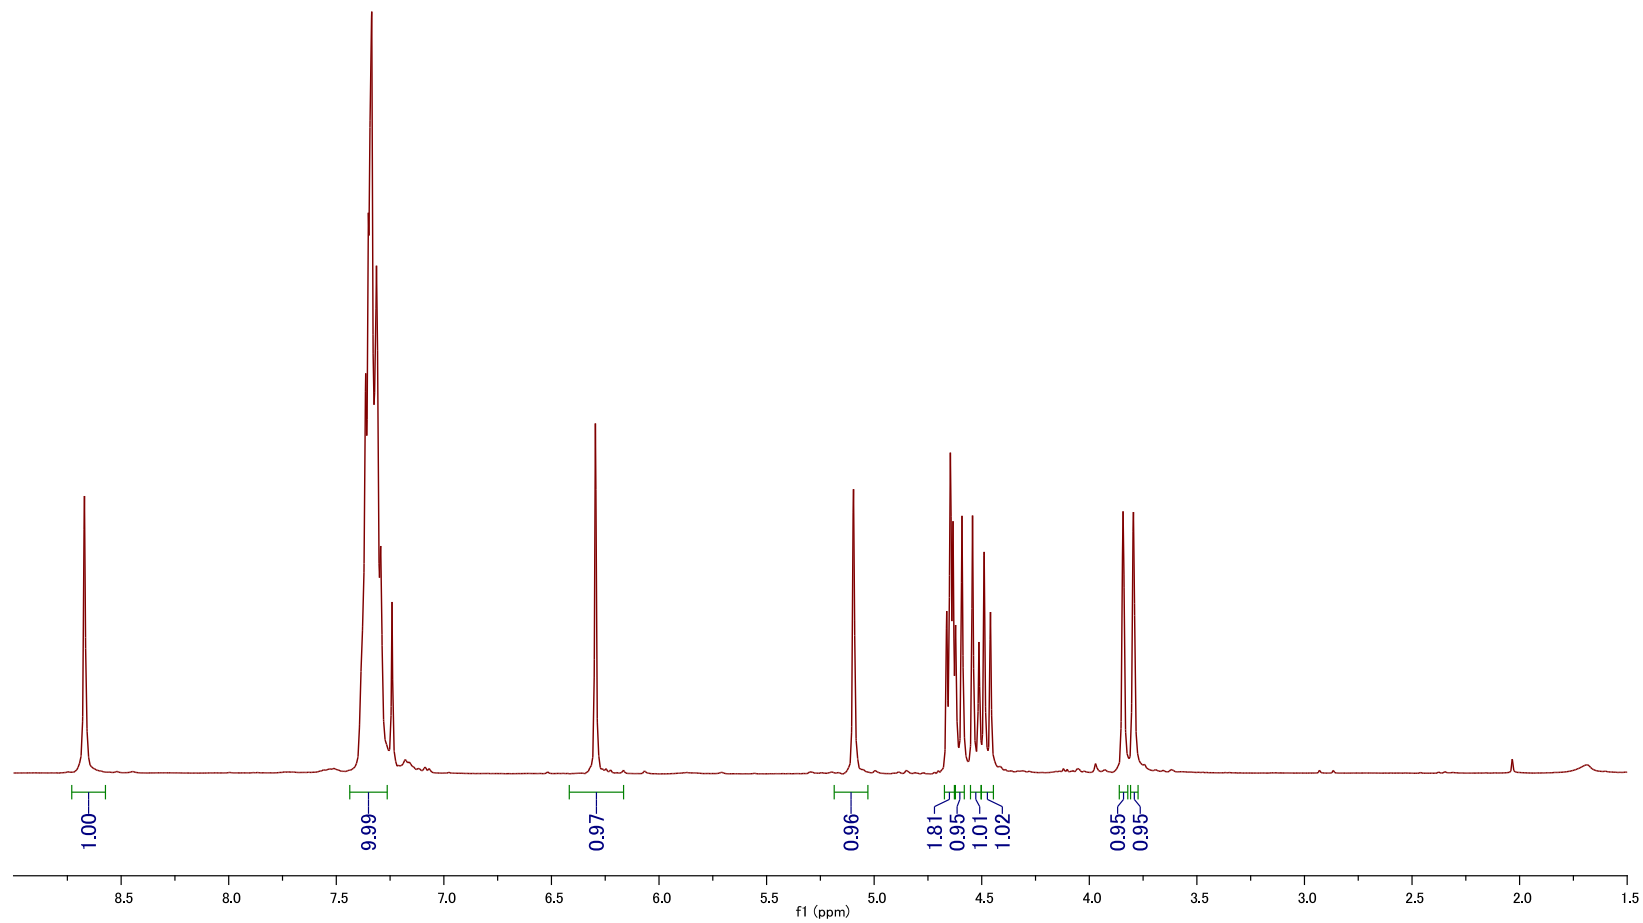

**3,4-Di-*O*-benzyl- $\beta$ -D-mannopyranurono-2,6-lactone-1-yl-trichloroacetimidate (**5c $\alpha$** )**  $^{13}\text{C}$  NMR (100 MHz,  $\text{CDCl}_3$ )

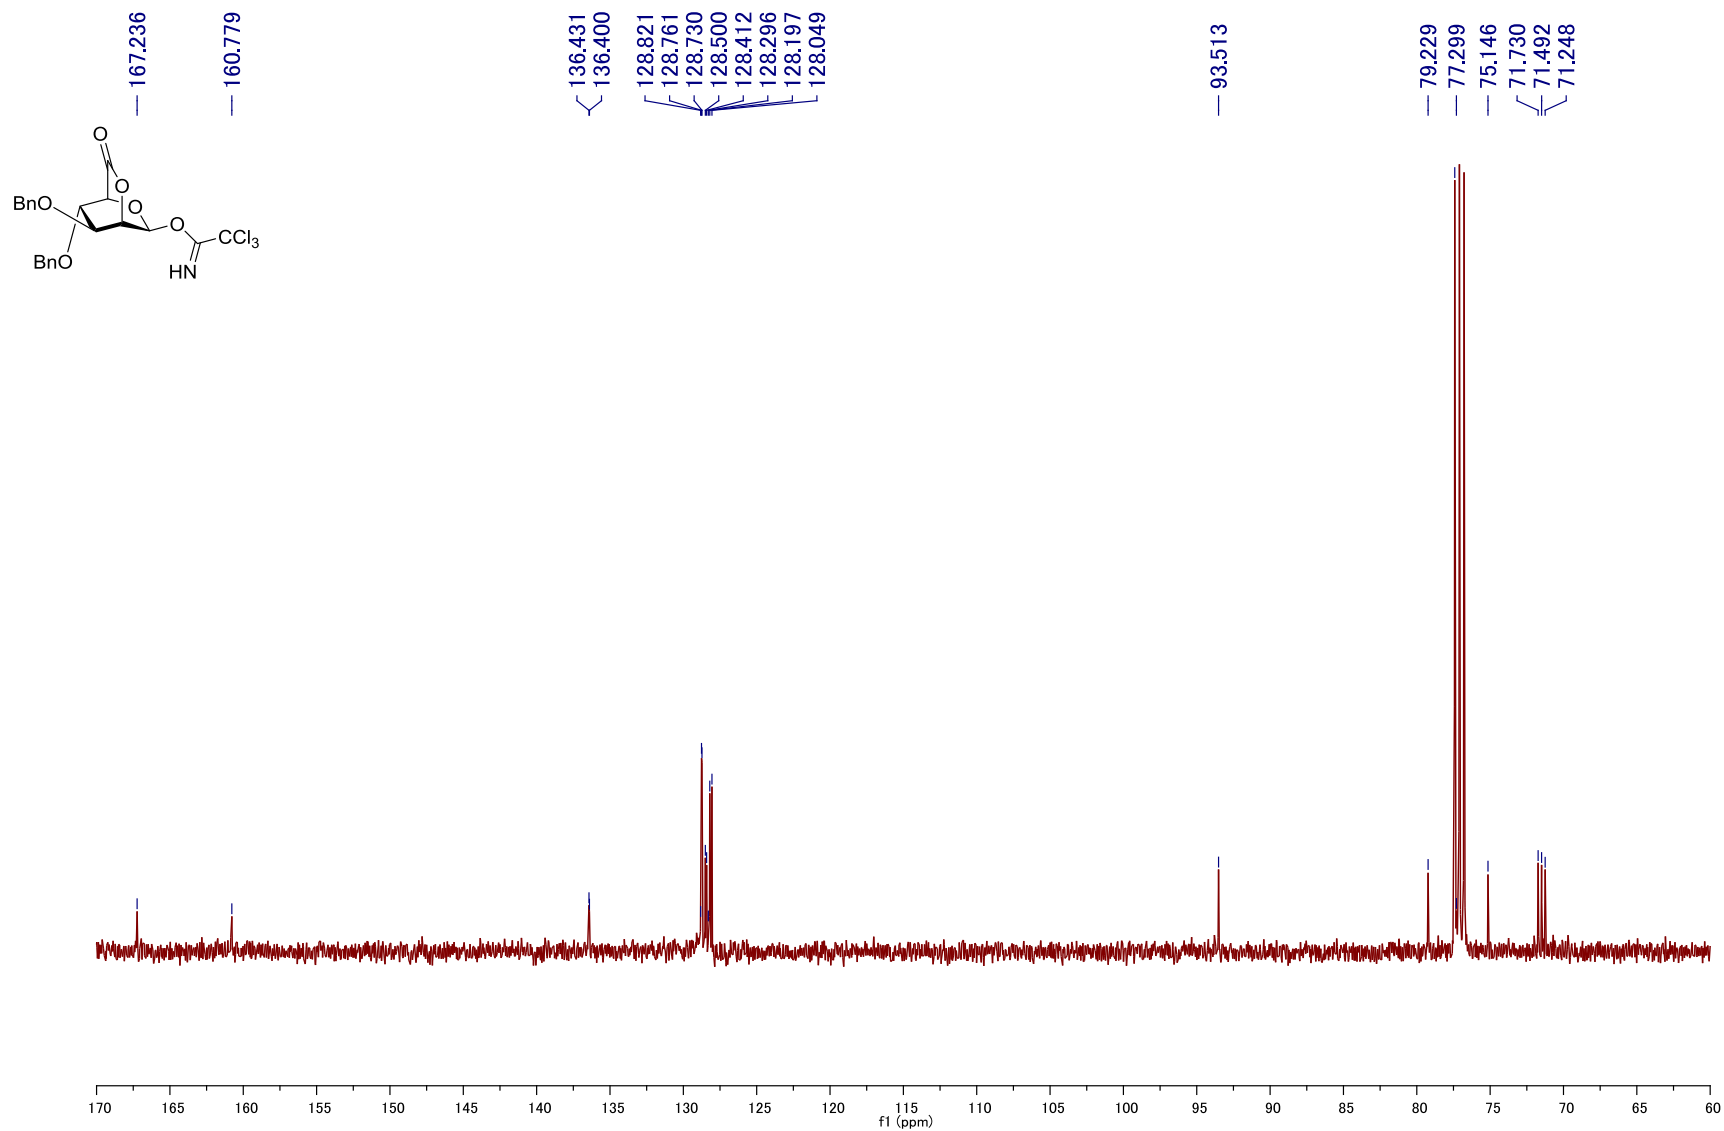

3,4-Di-*O*-benzyl- $\beta$ -D-mannopyranurono-2,6-lactone-1-yl trichloroacetimidate (**5c $\beta$** )  $^1\text{H}$ - $^1\text{H}$  NOESY (400 MHz,  $\text{CDCl}_3$ )

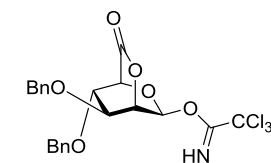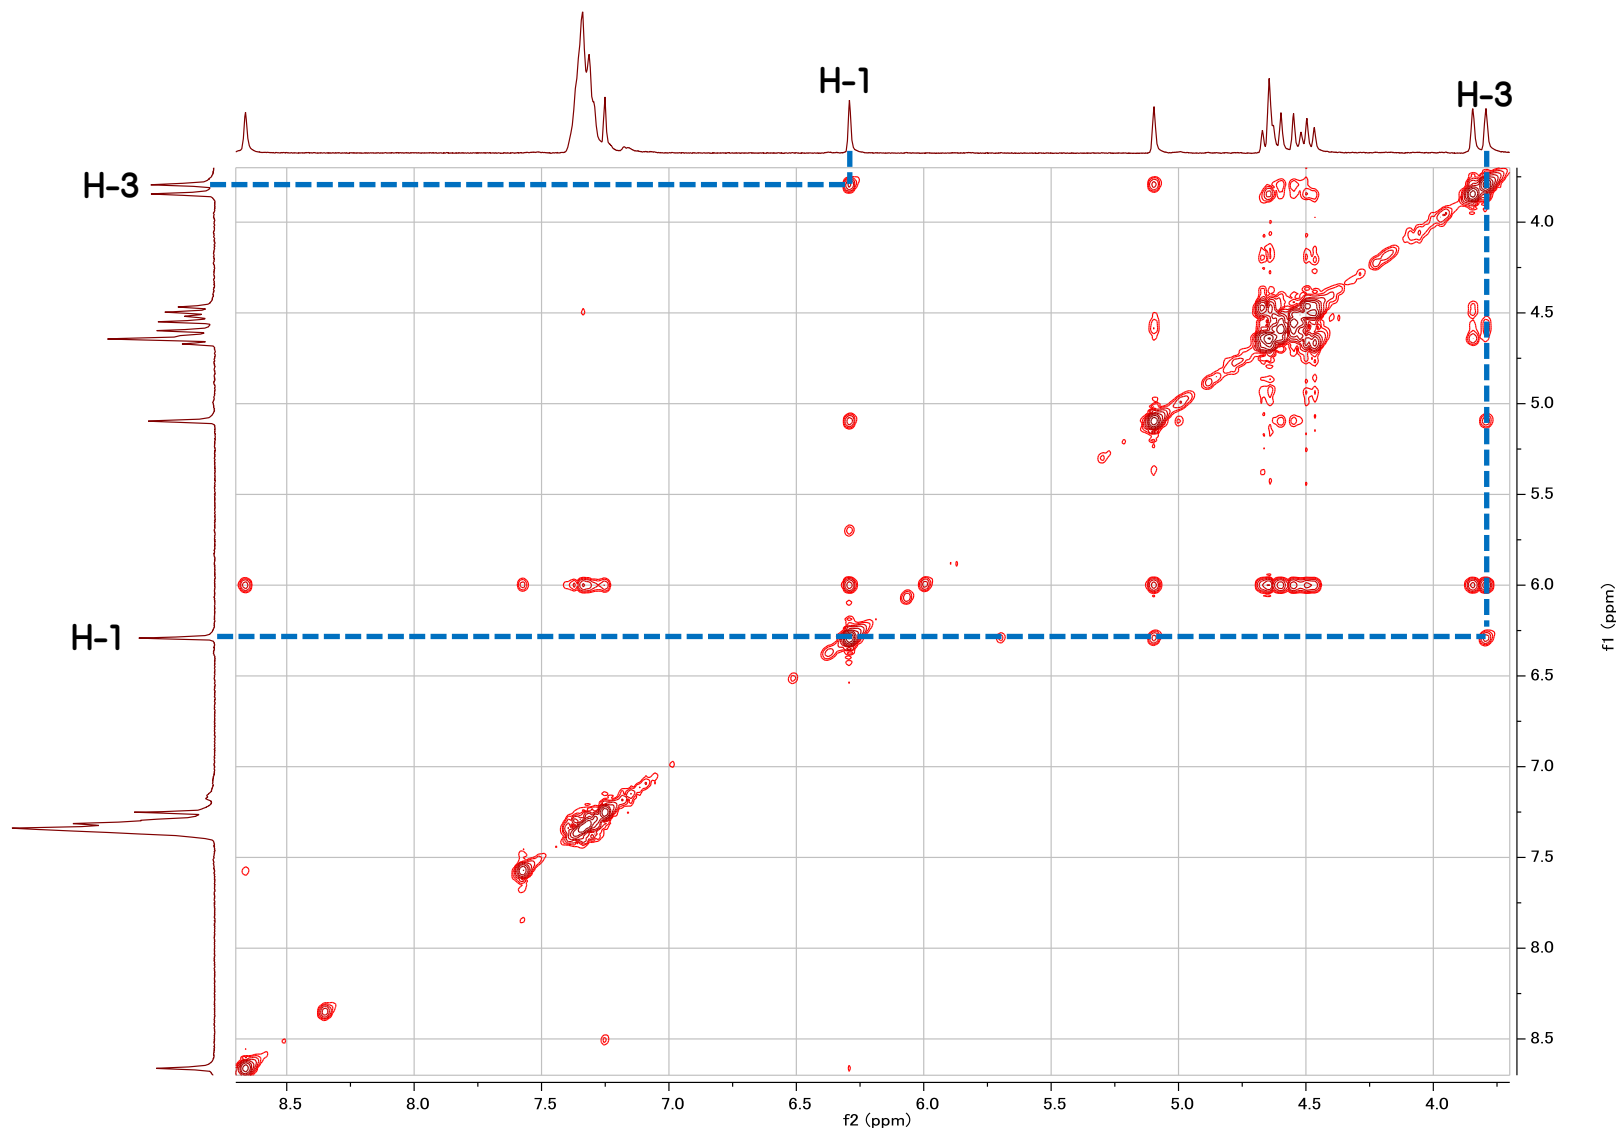

**3-*O*-Benzyl-4-*O*-*tert*-butyldimethylsilyl- $\alpha$ -D-mannopyranurono-2,6-lactone-1-yl-trichloroacetimidate (5d $\alpha$ )**  $^1\text{H}$  NMR (400 MHz,  $\text{CDCl}_3$ )

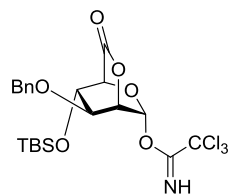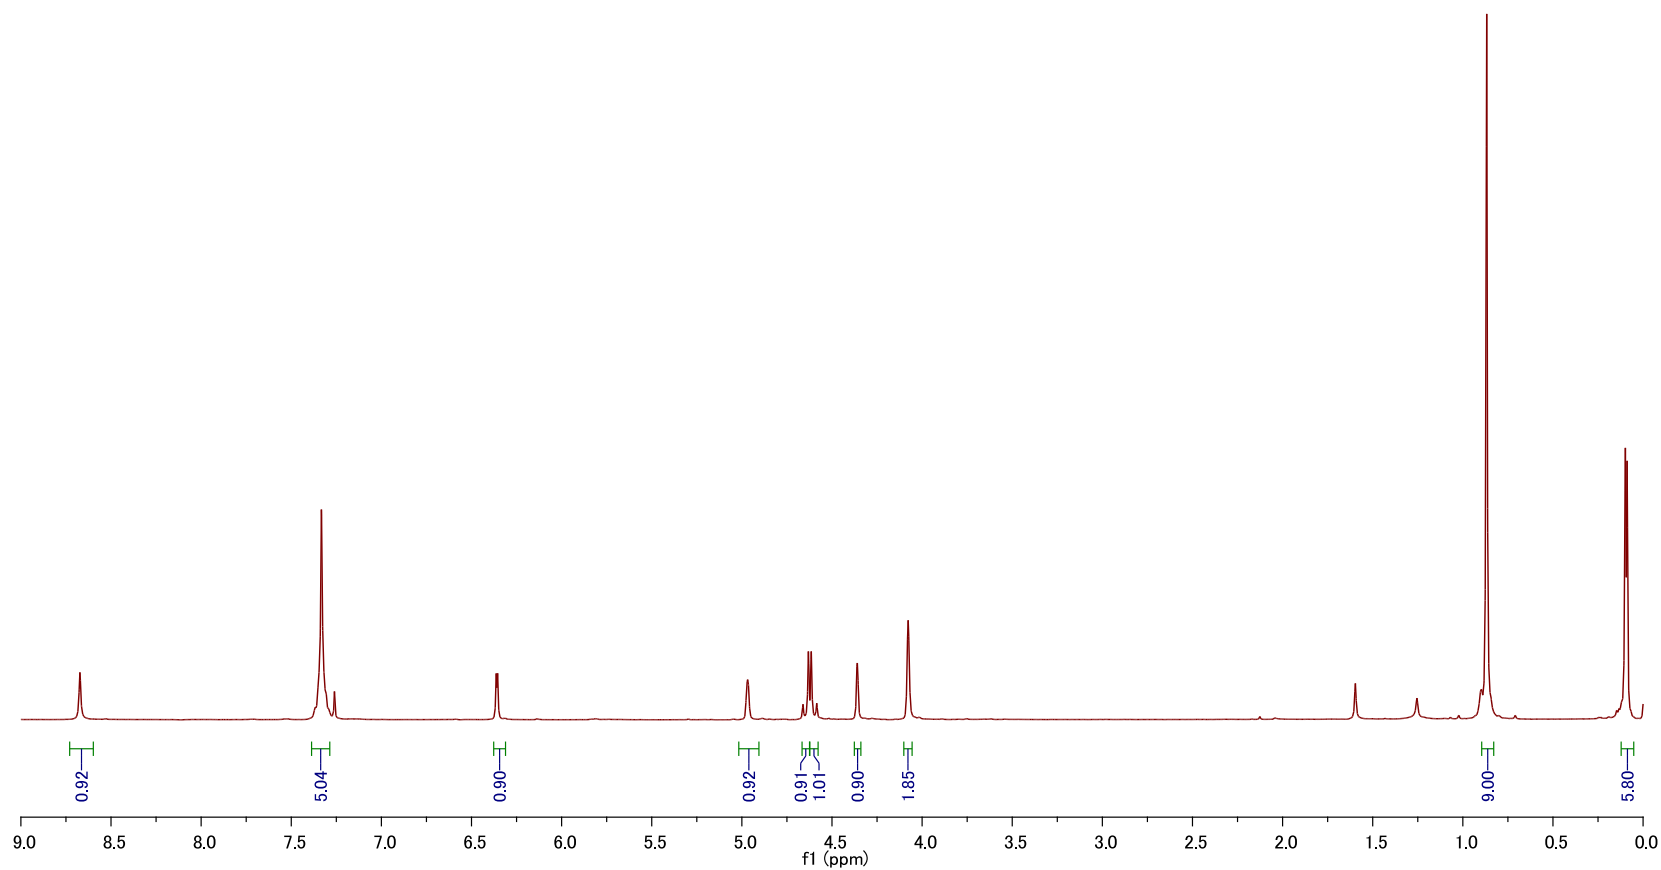

**3-*O*-Benzyl-4-*O*-*tert*-butyldimethylsilyl- $\alpha$ -D-mannopyranurono-2,6-lactone-1-yl-trichloroacetimidate (5d $\alpha$ )**  $^{13}\text{C}$  NMR (100 MHz,  $\text{CDCl}_3$ )

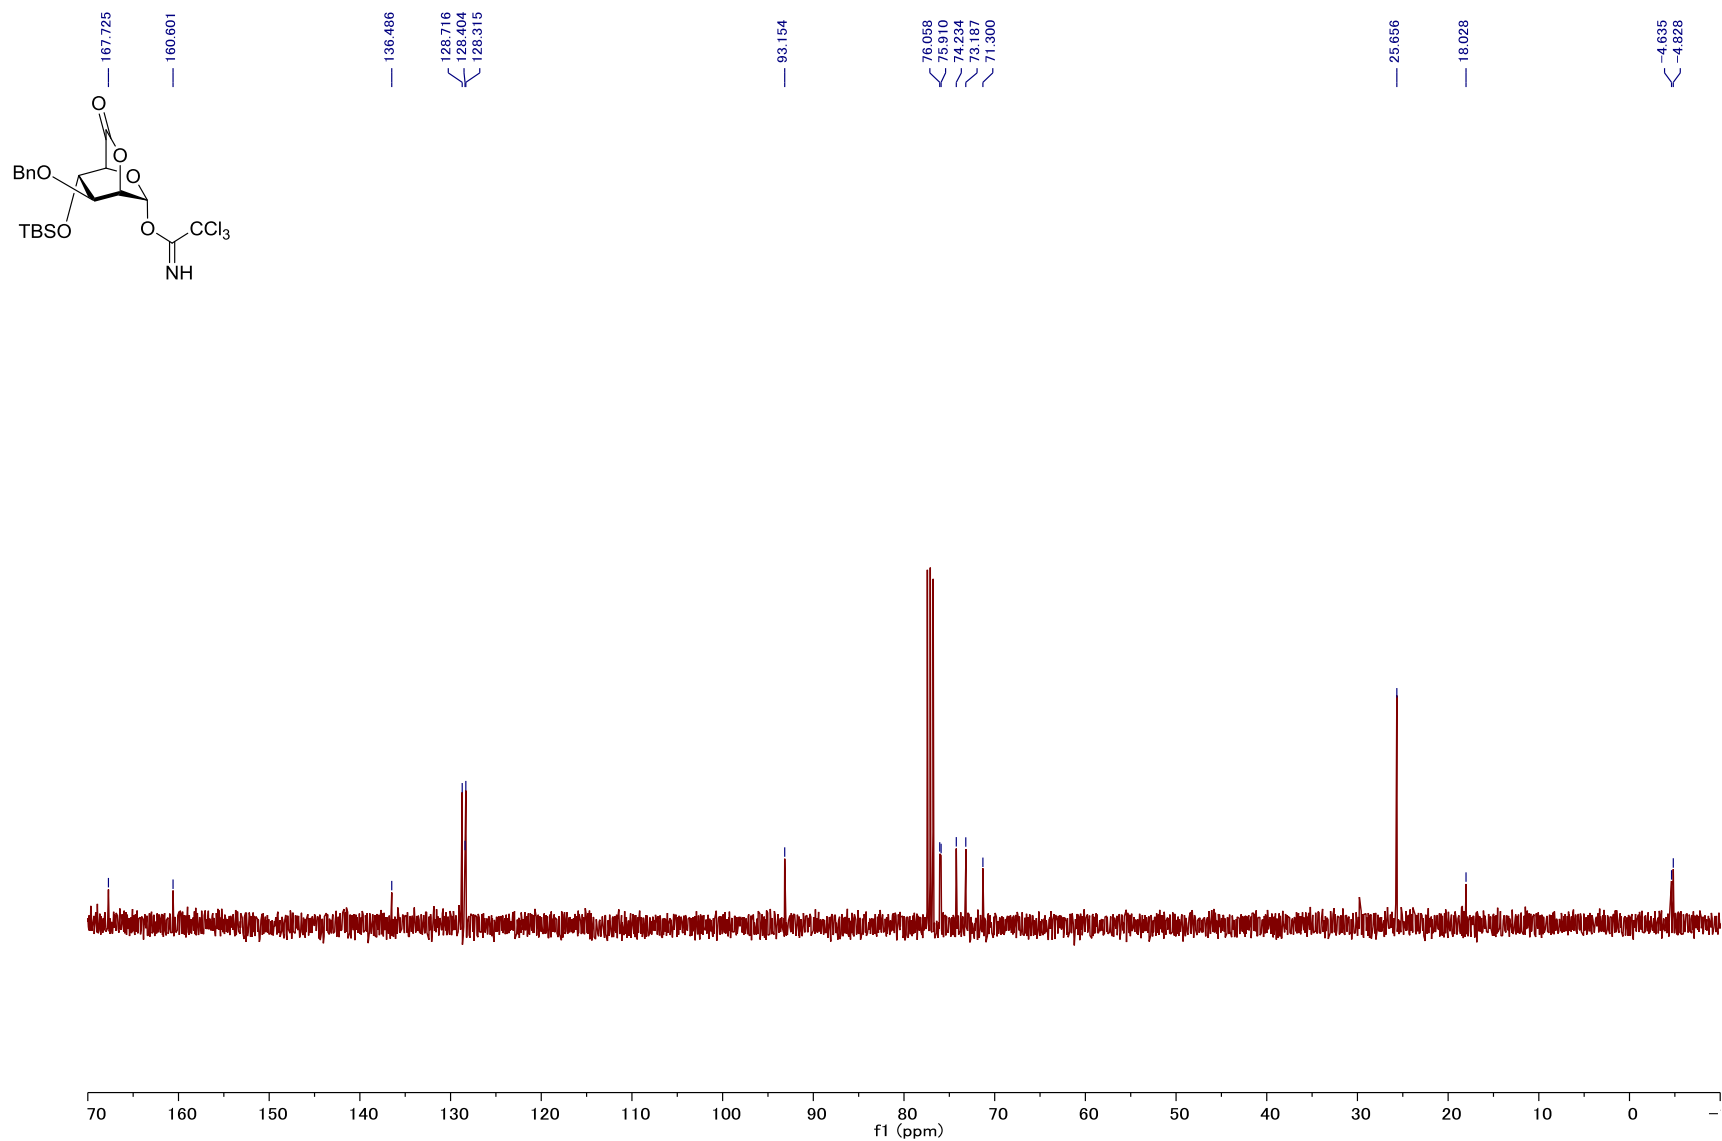

**3-*O*-Benzyl-4-*O*-*tert*-butyldimethylsilyl- $\beta$ -D-mannopyranurono-2,6-lactone-1-yl-trichloroacetimidate (5d $\beta$ )**  $^1\text{H}$  NMR (400 MHz,  $\text{CDCl}_3$ )

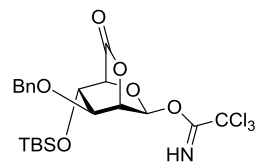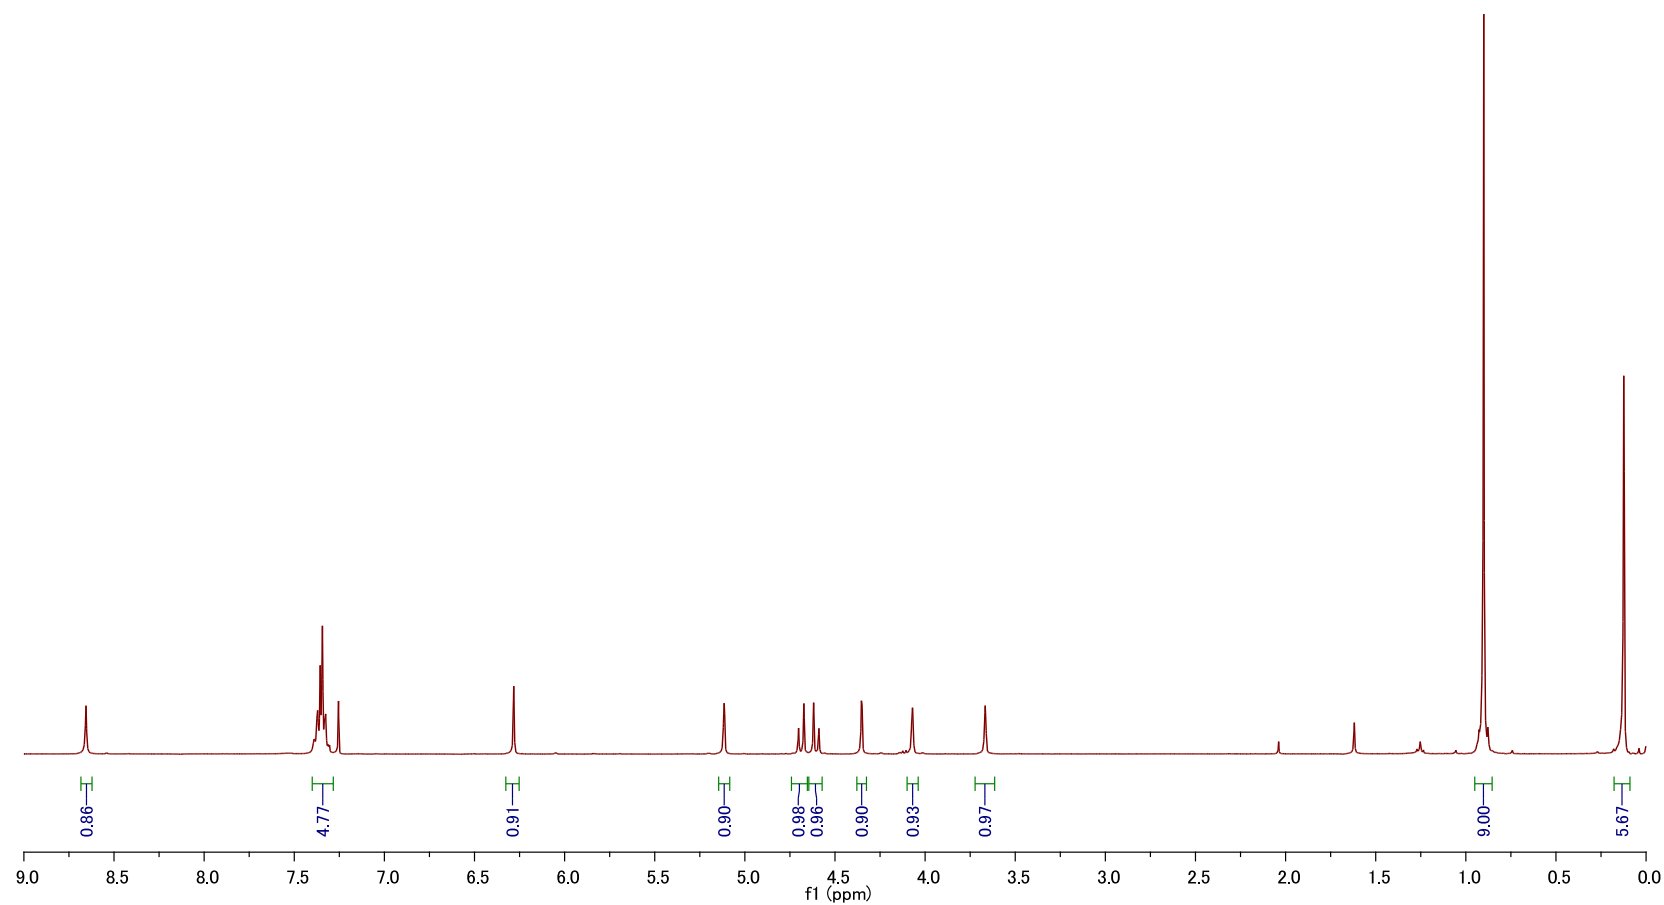



**3-*O*-Benzyl-4-*O*-*tert*-butyldimethylsilyl- $\beta$ -D-mannopyranurono-2,6-lactone-1-yl-trichloroacetimidate (5d $\beta$ )**  $^{13}\text{C}$  NMR (100 MHz,  $\text{CDCl}_3$ )

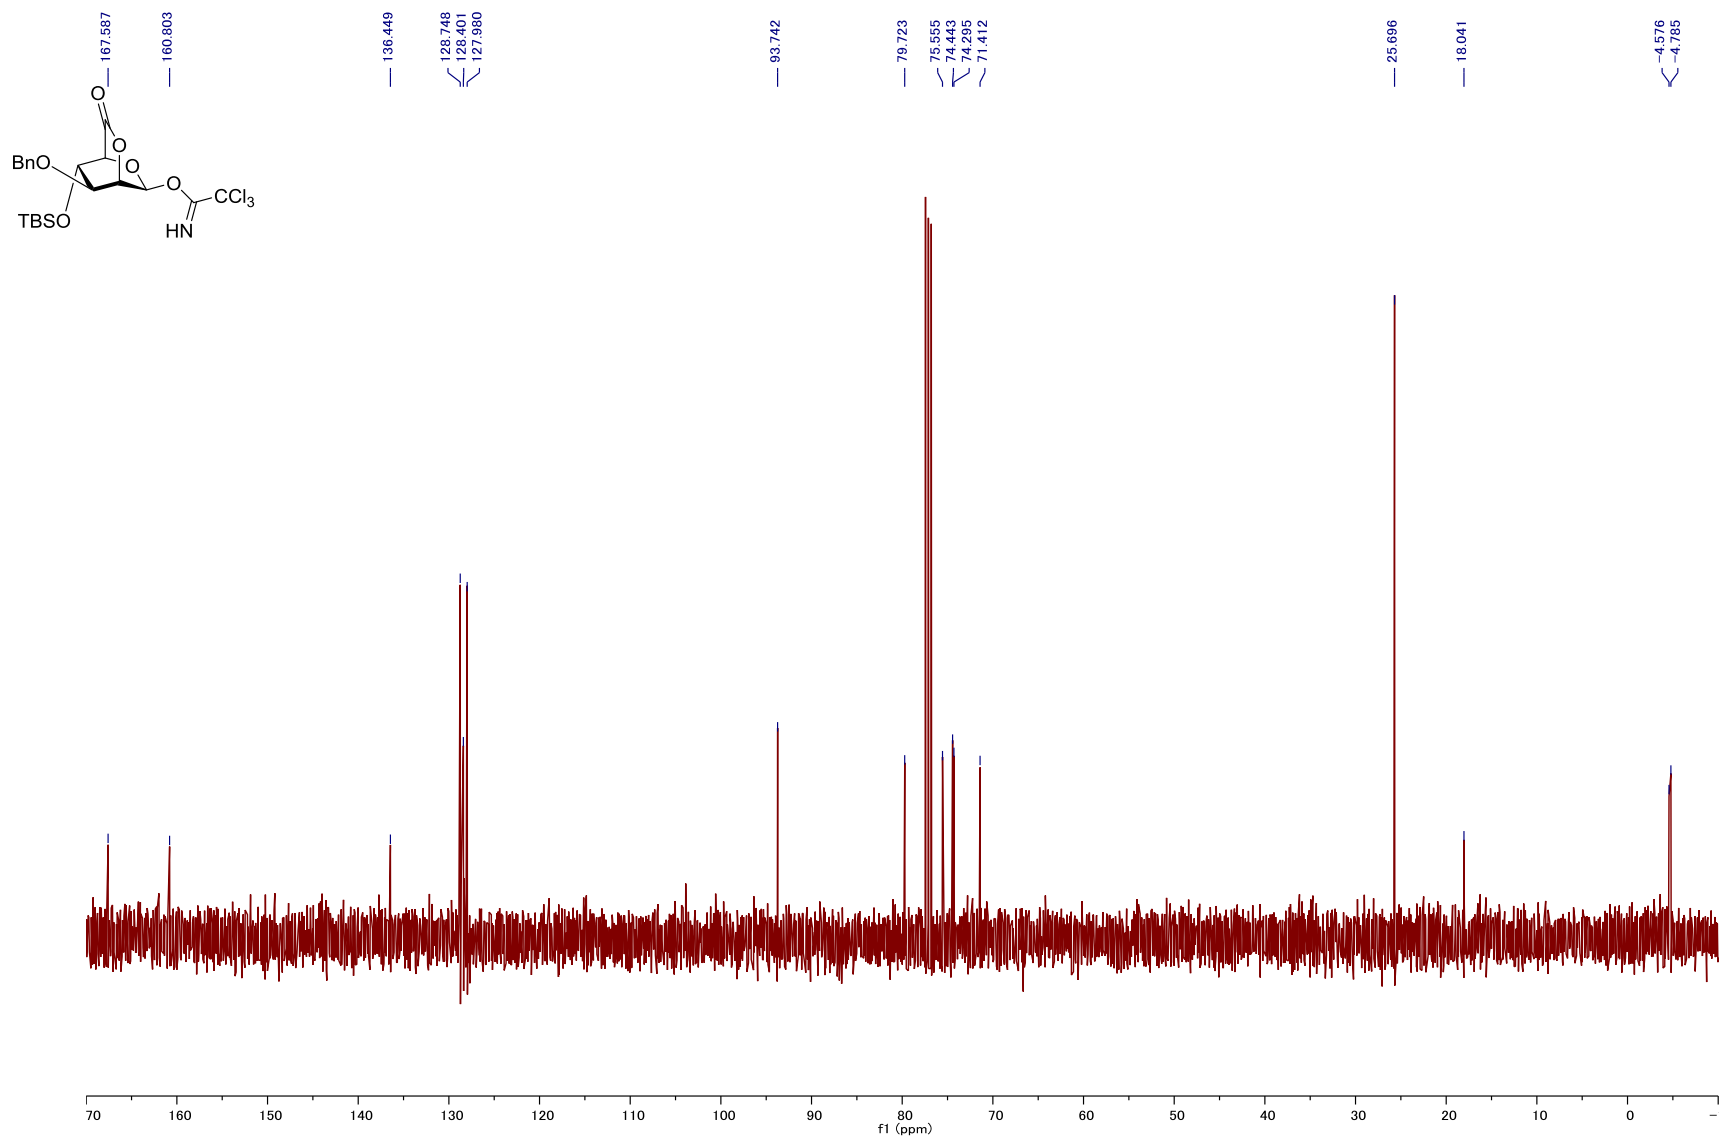

3-*O*-Benzyl-4-*O*-*tert*-butyldimethylsilyl- $\beta$ -D-mannopyranurono-2,6-lactone-1-yl-trichloroacetimidate (**5d**)  $^1\text{H}$ - $^1\text{H}$  NOESY (400 MHz,  $\text{CDCl}_3$ )

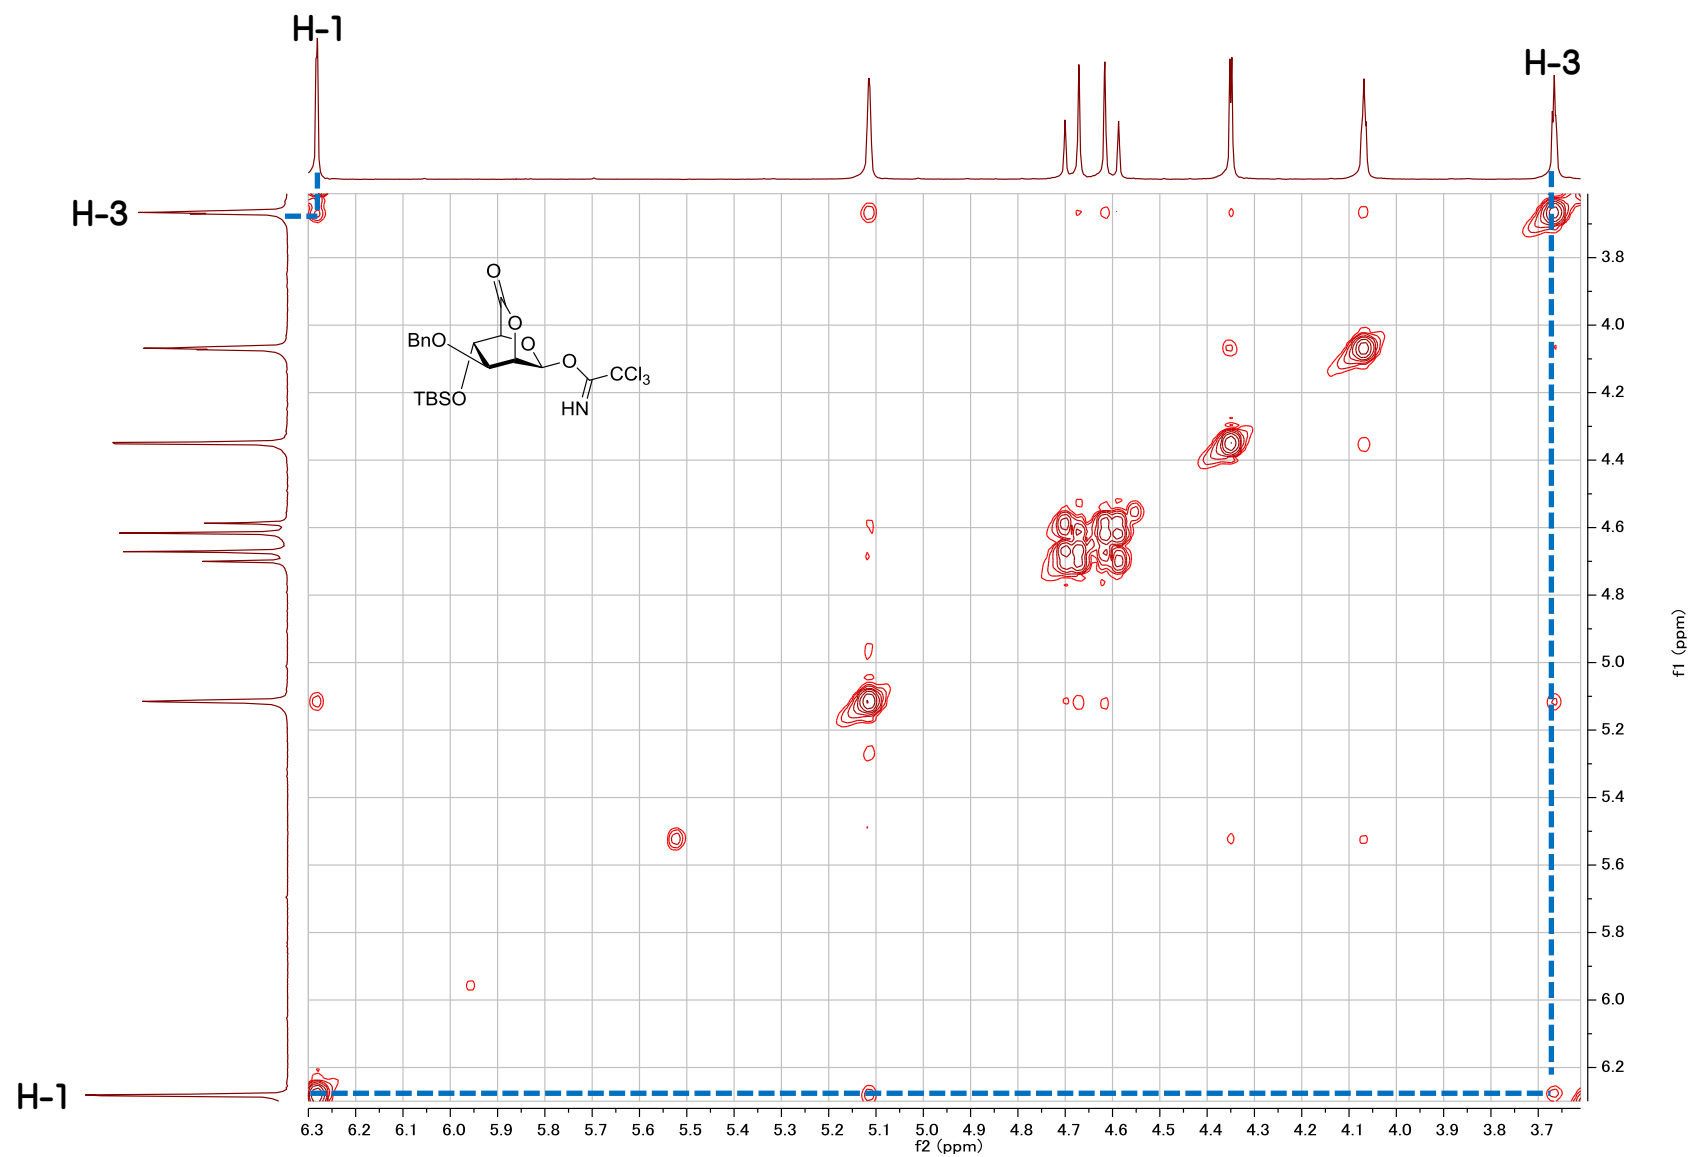

**Methyl 2,3,4-tri-*O*-benzyl-6-*O*-(3',4'-di-*O*-benzyl- $\beta$ -D-mannopyranurono-2',6'-lacton-1'-yl)- $\alpha$ -D-glucopyranoside (7a $\beta$ )**  $^1\text{H}$  NMR (400 MHz,  $\text{CDCl}_3$ )

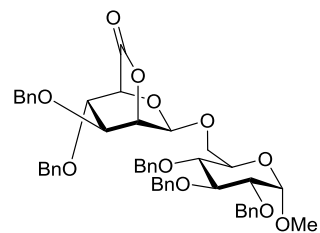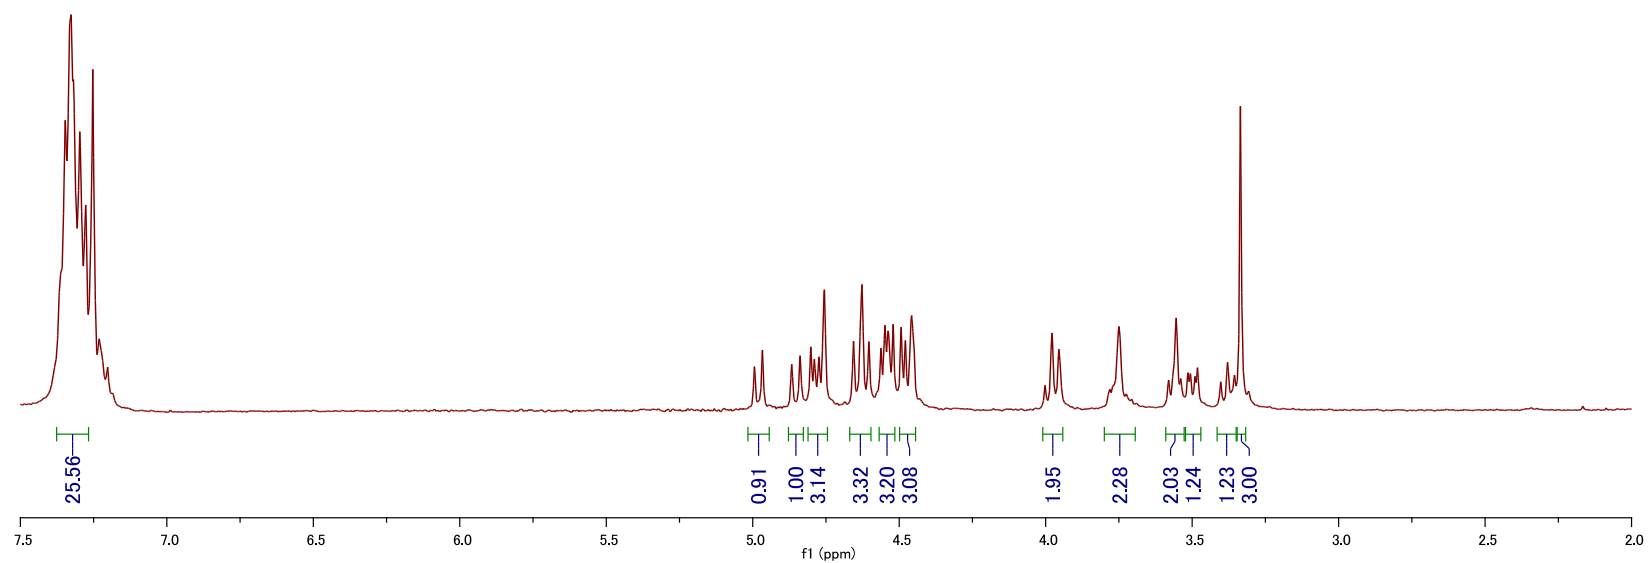

Methyl 2,3,4-tri-*O*-benzyl-6-*O*-(3',4'-di-*O*-benzyl- $\beta$ -D-mannopyranurono-2',6'-lacton-1'-yl)- $\alpha$ -D-glucopyranoside (**7a $\beta$** )  $^{13}\text{C}$  NMR (100 MHz,  $\text{CDCl}_3$ )

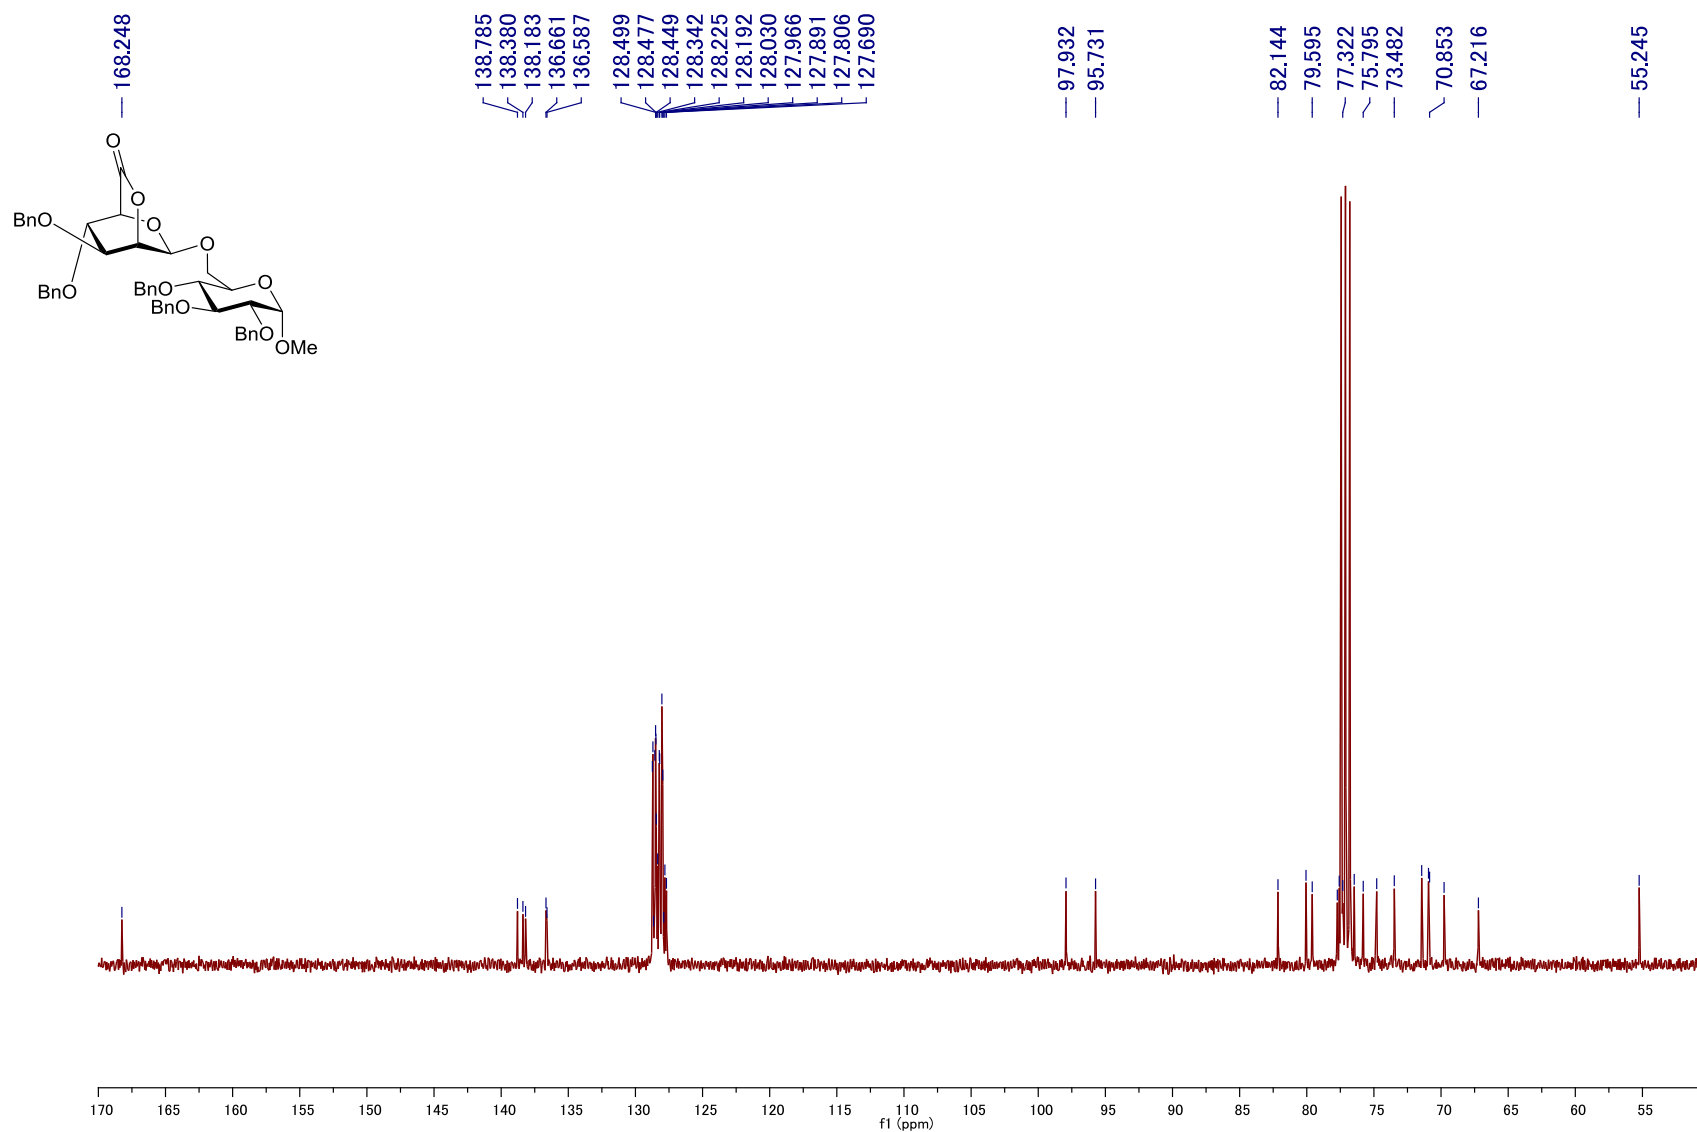

Methyl 2,3,4-tri-*O*-benzyl-6-*O*-(3',4'-di-*O*-benzyl- $\beta$ -D-mannopyranurono-2',6'-lacton-1'-yl)- $\alpha$ -D-glucopyranoside (7a $\beta$ )  $^1\text{H}$ - $^1\text{H}$  NOESY (400 MHz,  $\text{CDCl}_3$ )

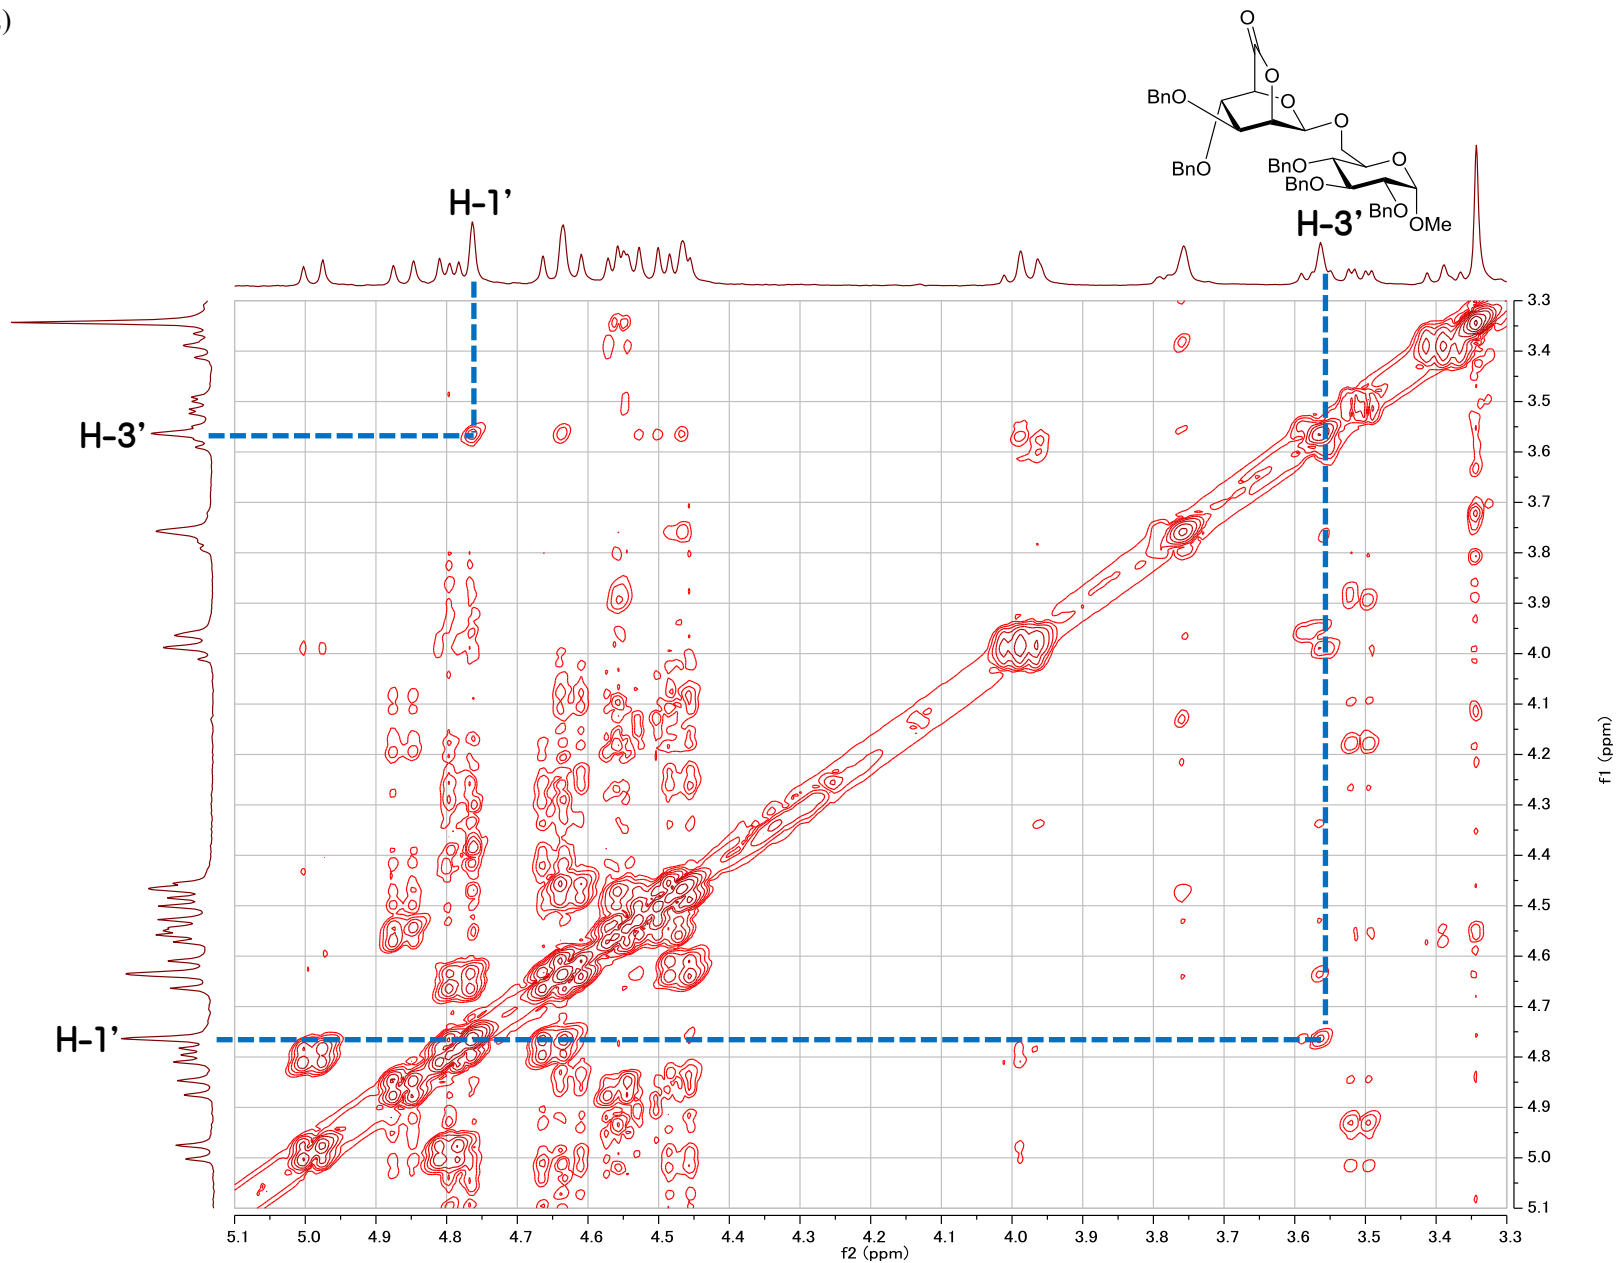

**Methyl 2,3,4-tri-*O*-benzyl-6-*O*-(3',4'-di-*O*-benzyl- $\alpha$ -D-mannopyranurono-2',6'-lacton-1'-yl)- $\alpha$ -D-glucopyranoside (7a $\alpha$ )**  $^1\text{H}$  NMR (400 MHz,  $\text{CDCl}_3$ )

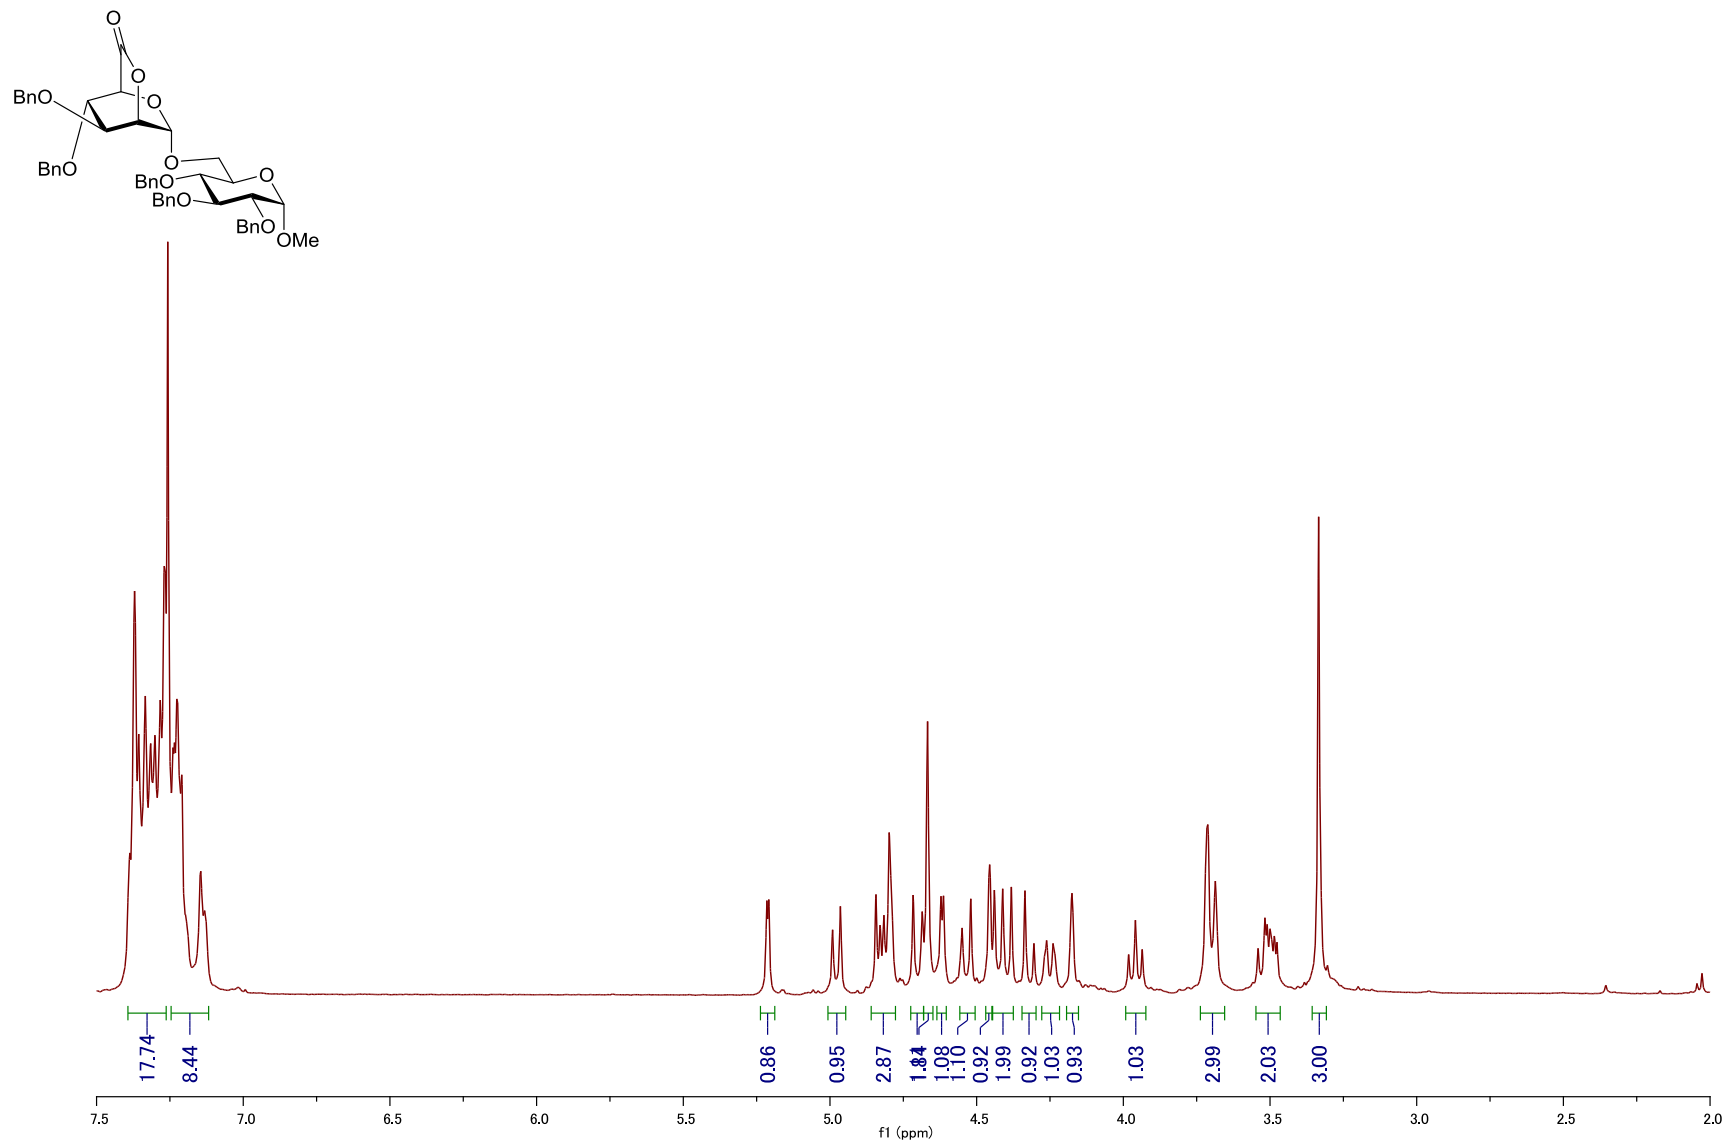

Methyl 2,3,4-tri-*O*-benzyl-6-*O*-(3',4'-di-*O*-benzyl- $\alpha$ -D-mannopyranurono-2',6'-lacton-1'-yl)- $\alpha$ -D-glucopyranoside (**7a**)  $^{13}\text{C}$  NMR (100 MHz,  $\text{CDCl}_3$ )

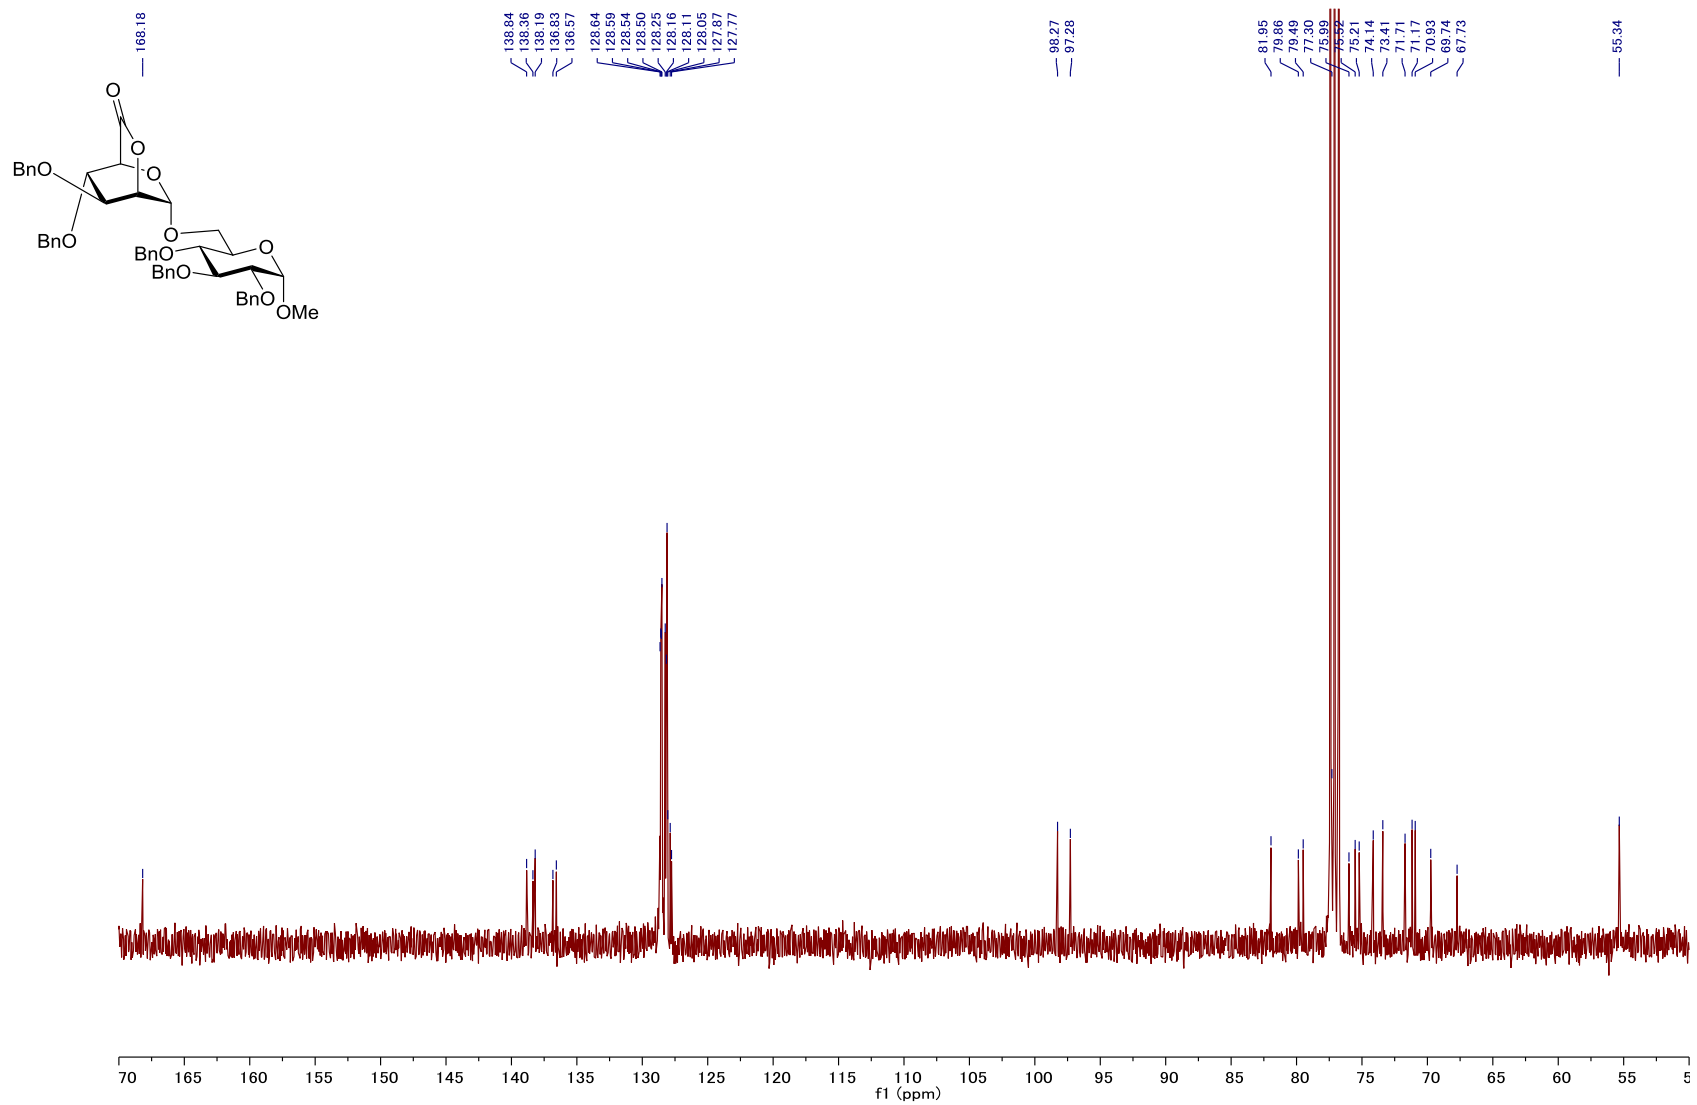

**Methyl 2,3-*O*-isopropylidene-4-*O*-(3',4'-di-*O*-benzyl- $\beta$ -D-mannopyranurono-2',6'-lacton-1'-yl)- $\alpha$ -L-rhamnopyranoside (7b $\beta$ )**  $^1\text{H}$  NMR (400 MHz,  $\text{CDCl}_3$ )

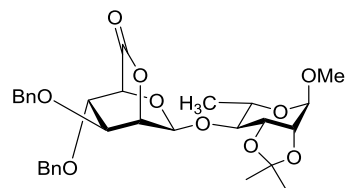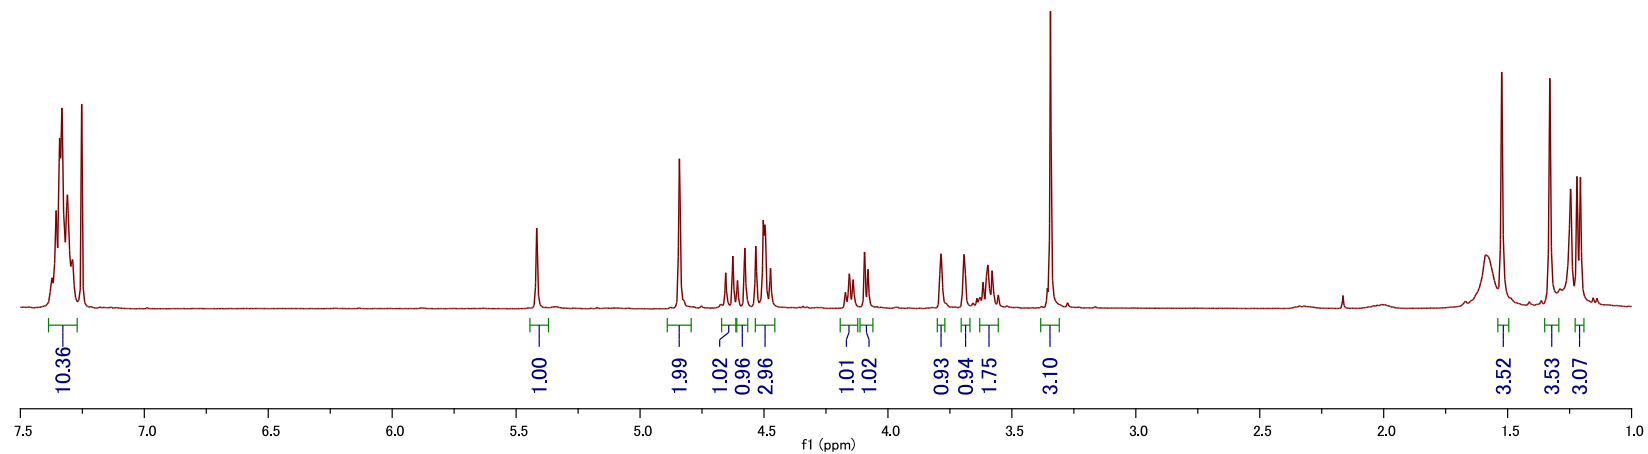



**2,3-*O*-isopropylidene-4-*O*-(3',4'-di-*O*-benzyl- $\beta$ -D-mannopyranurono-2',6'-lacton-1'-yl)- $\alpha$ -L-rhamnopyranoside (7b $\beta$ )** <sup>13</sup>C NMR (100 MHz, CDCl<sub>3</sub>)

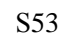

**Methyl 2,3-*O*-isopropylidene-4-*O*-(3',4'-di-*O*-benzyl- $\beta$ -D-mannopyranurono-2',6'-lacton-1'-yl)- $\alpha$ -L-rhamnopyranoside (7b $\beta$ )**  $^1\text{H}$ - $^1\text{H}$  NOESY (400 MHz,  $\text{CDCl}_3$ )

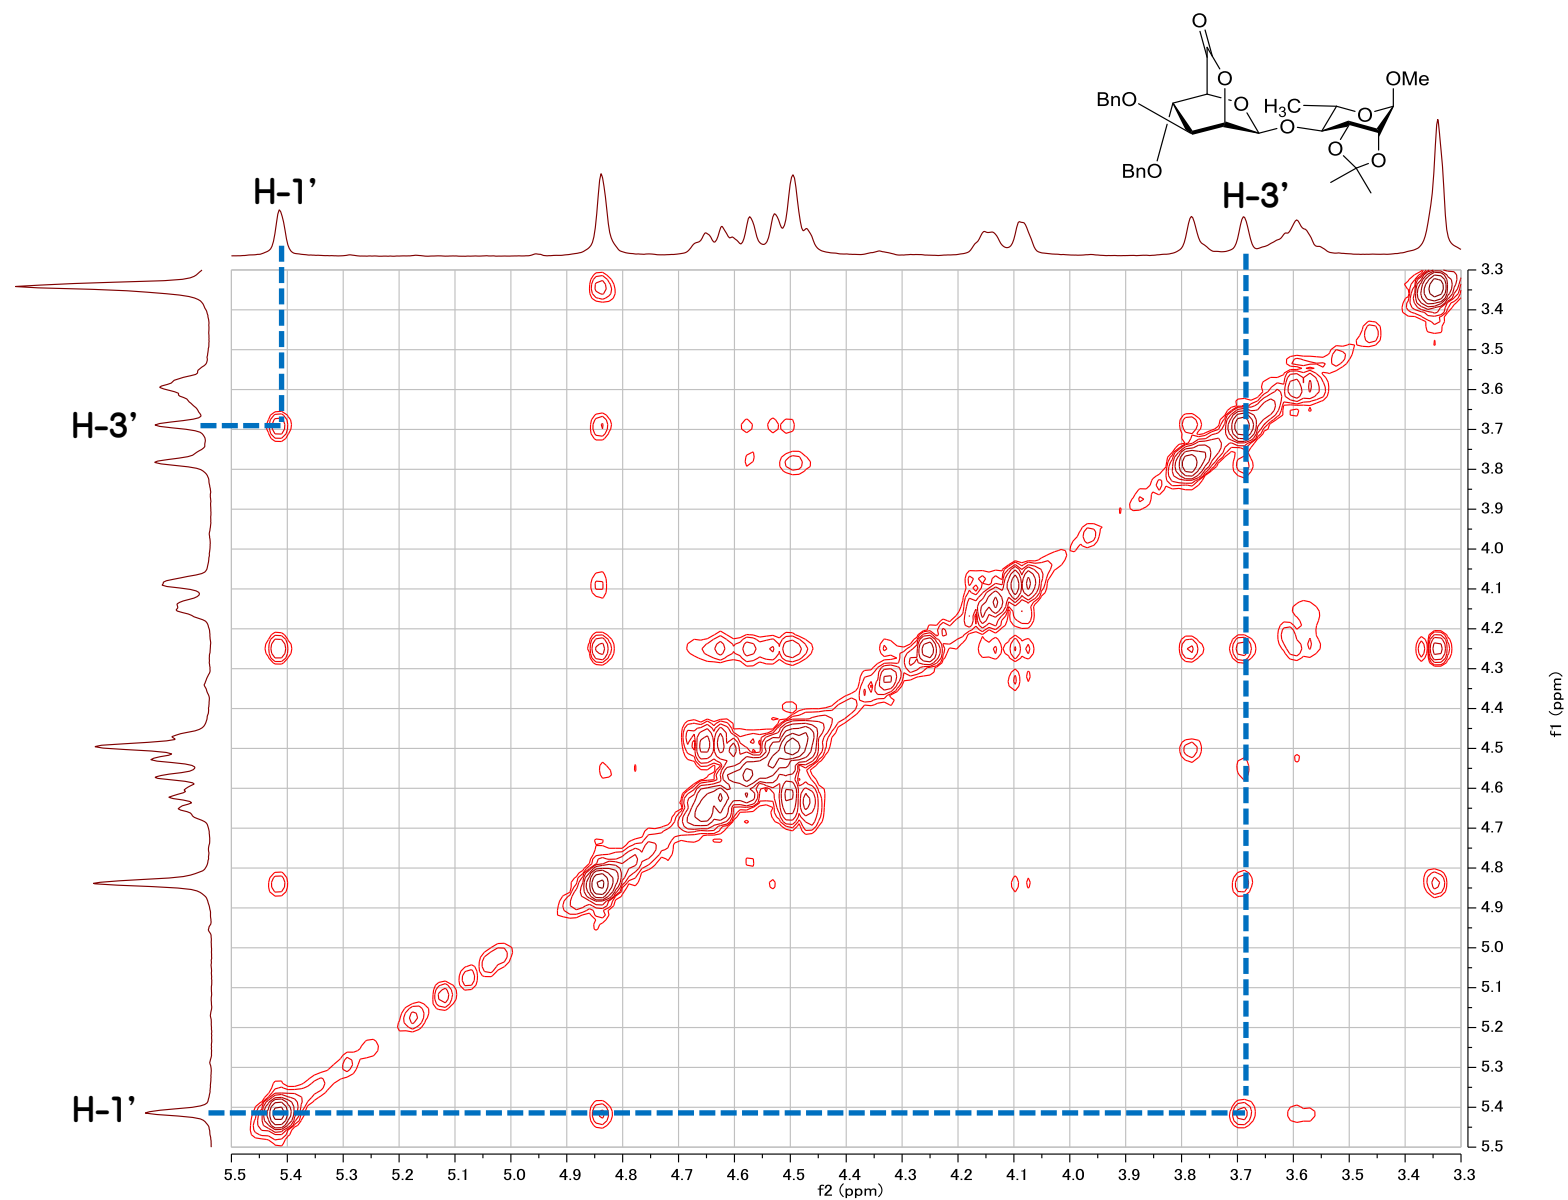

Allyl

**2-*O*-(3',4'-di-*O*-benzyl- $\beta$ -D-mannopyranurono-2',6'-lacton-1'-yl)-3-*O*-benzyl-4,6-*O*-benzylidene- $\alpha$ -D-mannopyranoside (7c $\beta$ )**  $^1\text{H}$  NMR (400 MHz,  $\text{CDCl}_3$ )

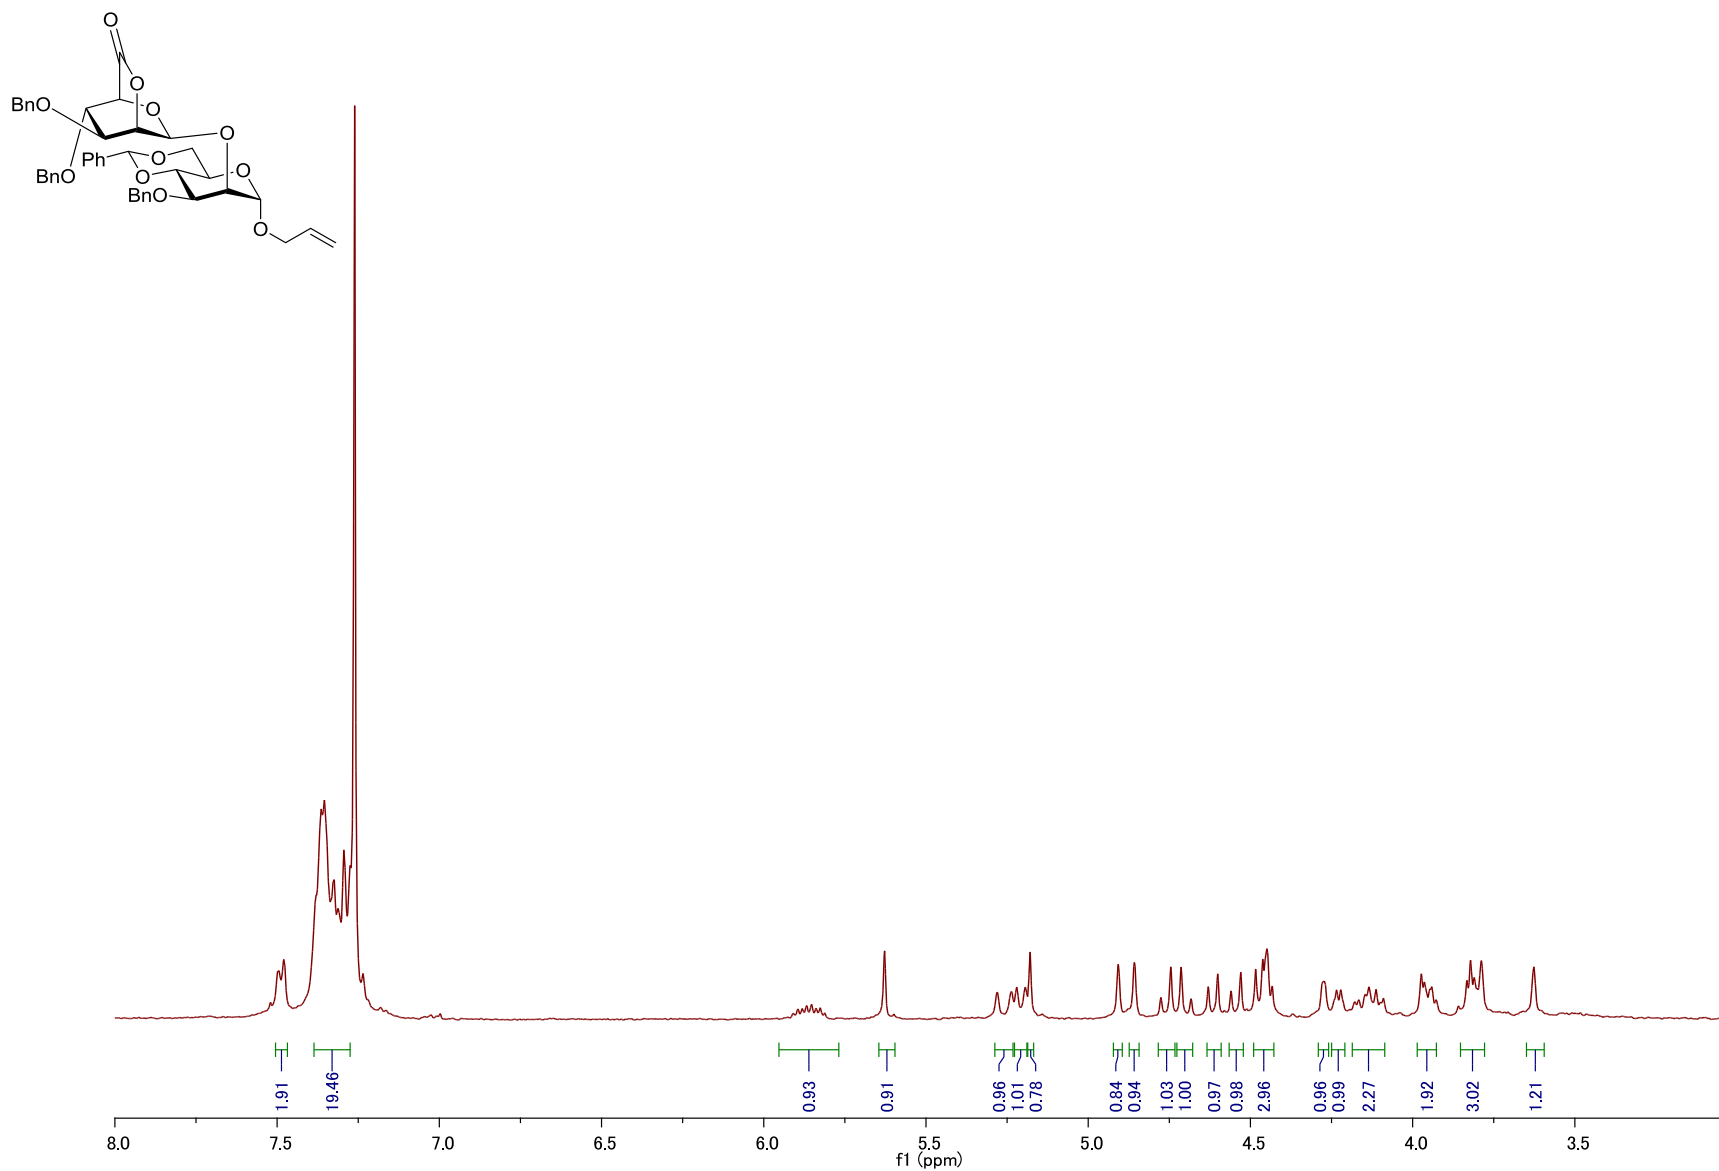

Allyl

**2-*O*-(3',4'-di-*O*-benzyl- $\beta$ -D-mannopyranurono-2',6'-lacton-1'-yl)-3-*O*-benzyl-4,6-*O*-benzylidene- $\alpha$ -D-mannopyranoside (7c $\beta$ )**  $^{13}\text{C}$  NMR (100 MHz,  $\text{CDCl}_3$ )

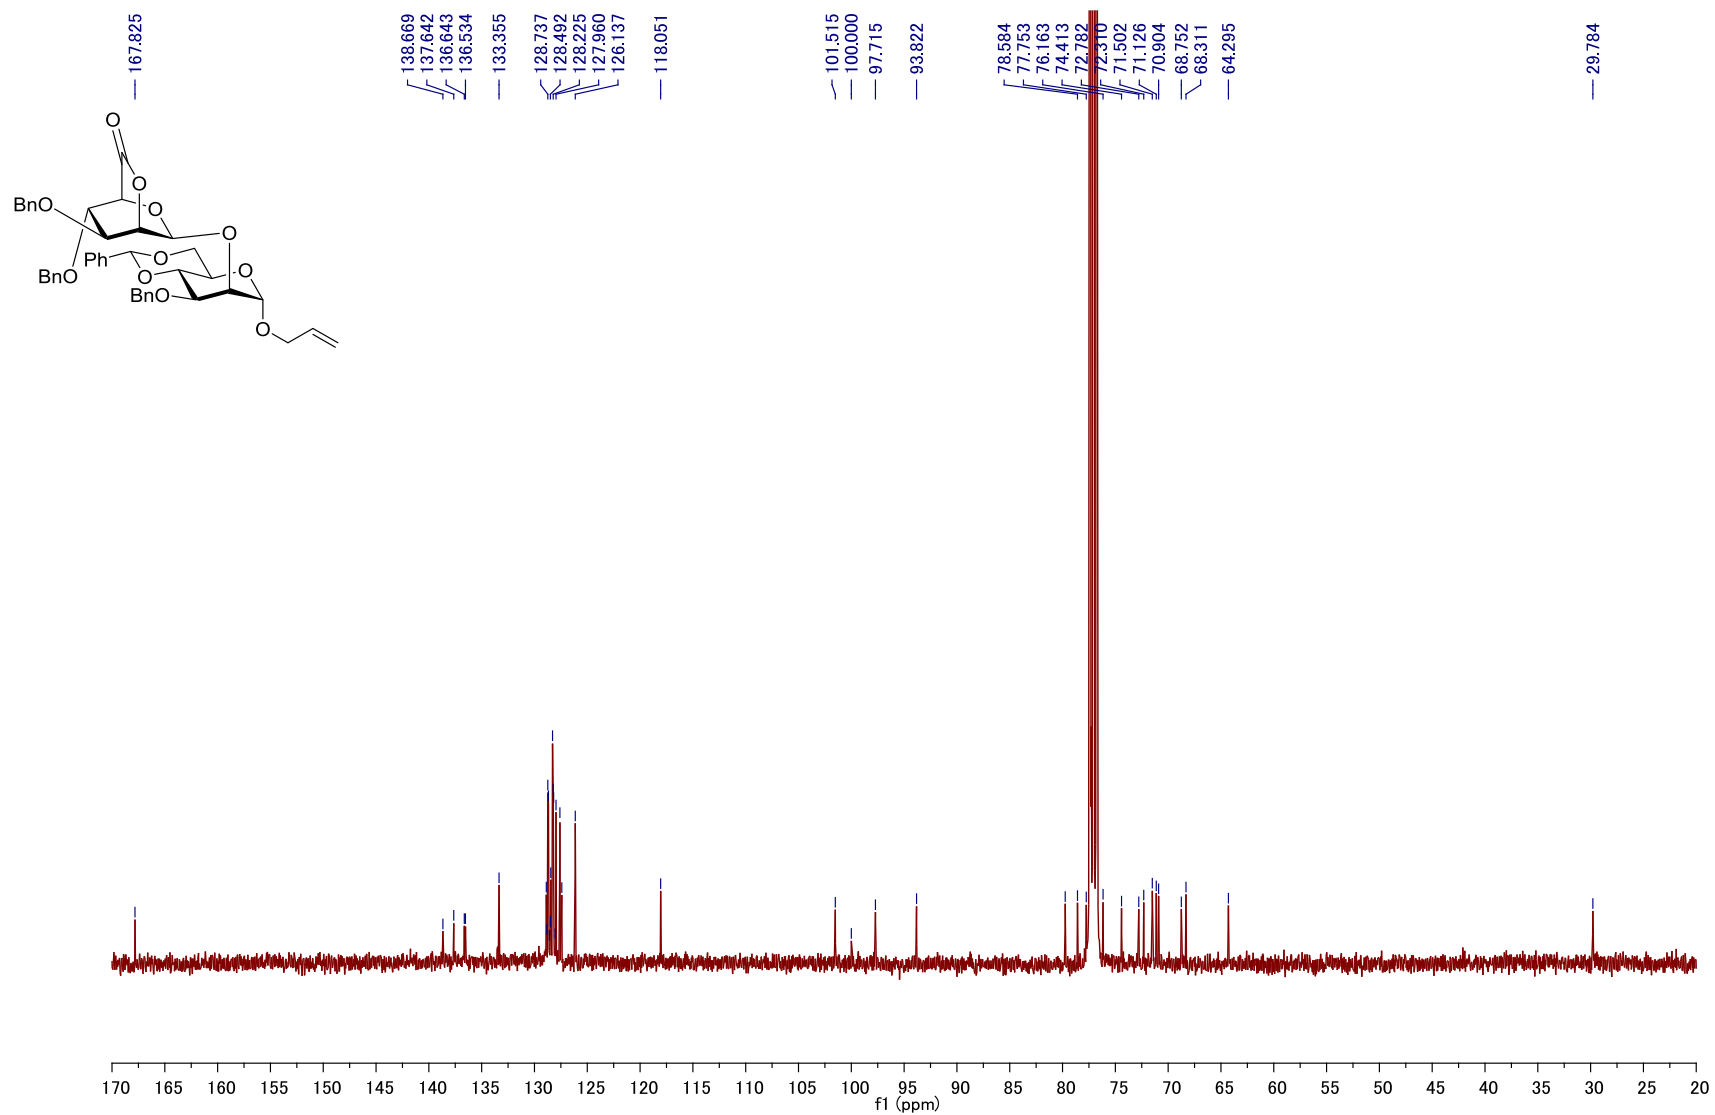

Allyl 2-*O*-(3',4'-di-*O*-benzyl- $\beta$ -D-mannopyranurono-2',6'-lacton-1'-yl)-3-*O*-benzyl-4,6-*O*-benzylidene- $\alpha$ -D-mannopyranoside (7c $\beta$ )  $^1\text{H}$ - $^1\text{H}$  NOESY (400 MHz,  $\text{CDCl}_3$ )

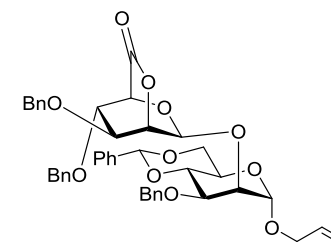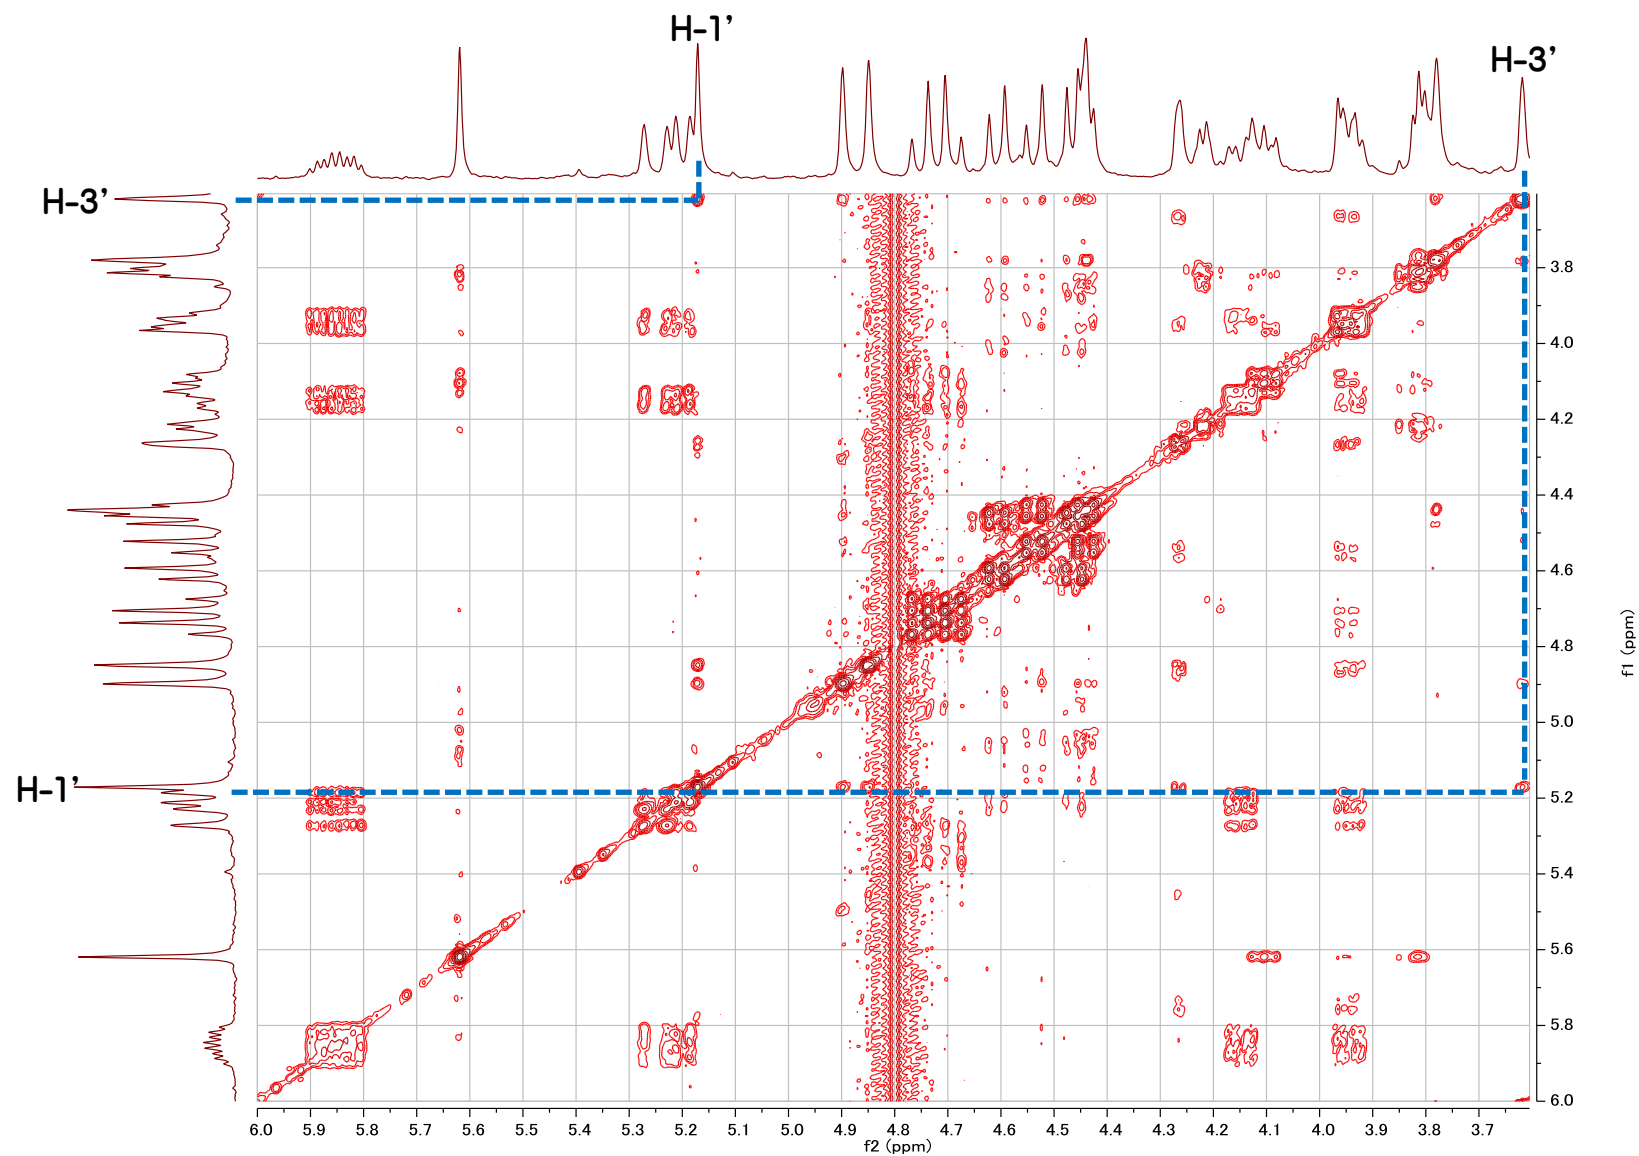

## Methyl

**2-*O*-(3',4'-di-*O*-benzyl- $\beta$ -D-mannopyranurono-2',6'-lacton-1'-yl)-3-*O*-benzyl-4,6-*O*-benzylidene- $\alpha$ -D-glucopyranoside (7d $\beta$ )**  $^1\text{H}$  NMR (400 MHz,  $\text{CDCl}_3$ )

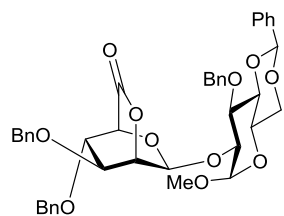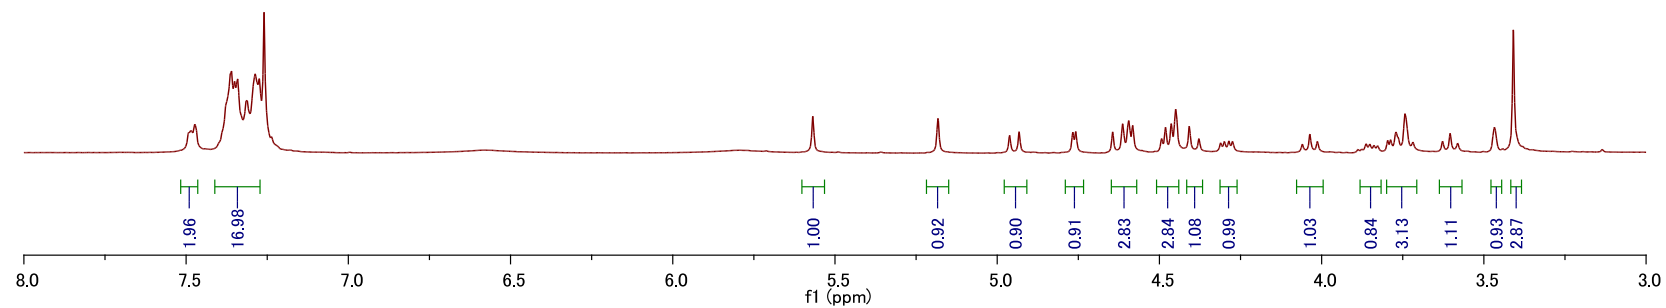

# Methyl

2-*O*-(3',4'-di-*O*-benzyl- $\beta$ -D-mannopyranurono-2',6'-lacton-1'-yl)-3-*O*-benzyl-4,6-*O*-benzylidene- $\alpha$ -D-glucopyranoside (7d $\beta$ )  $^{13}\text{C}$  NMR (100 MHz,  $\text{CDCl}_3$ )

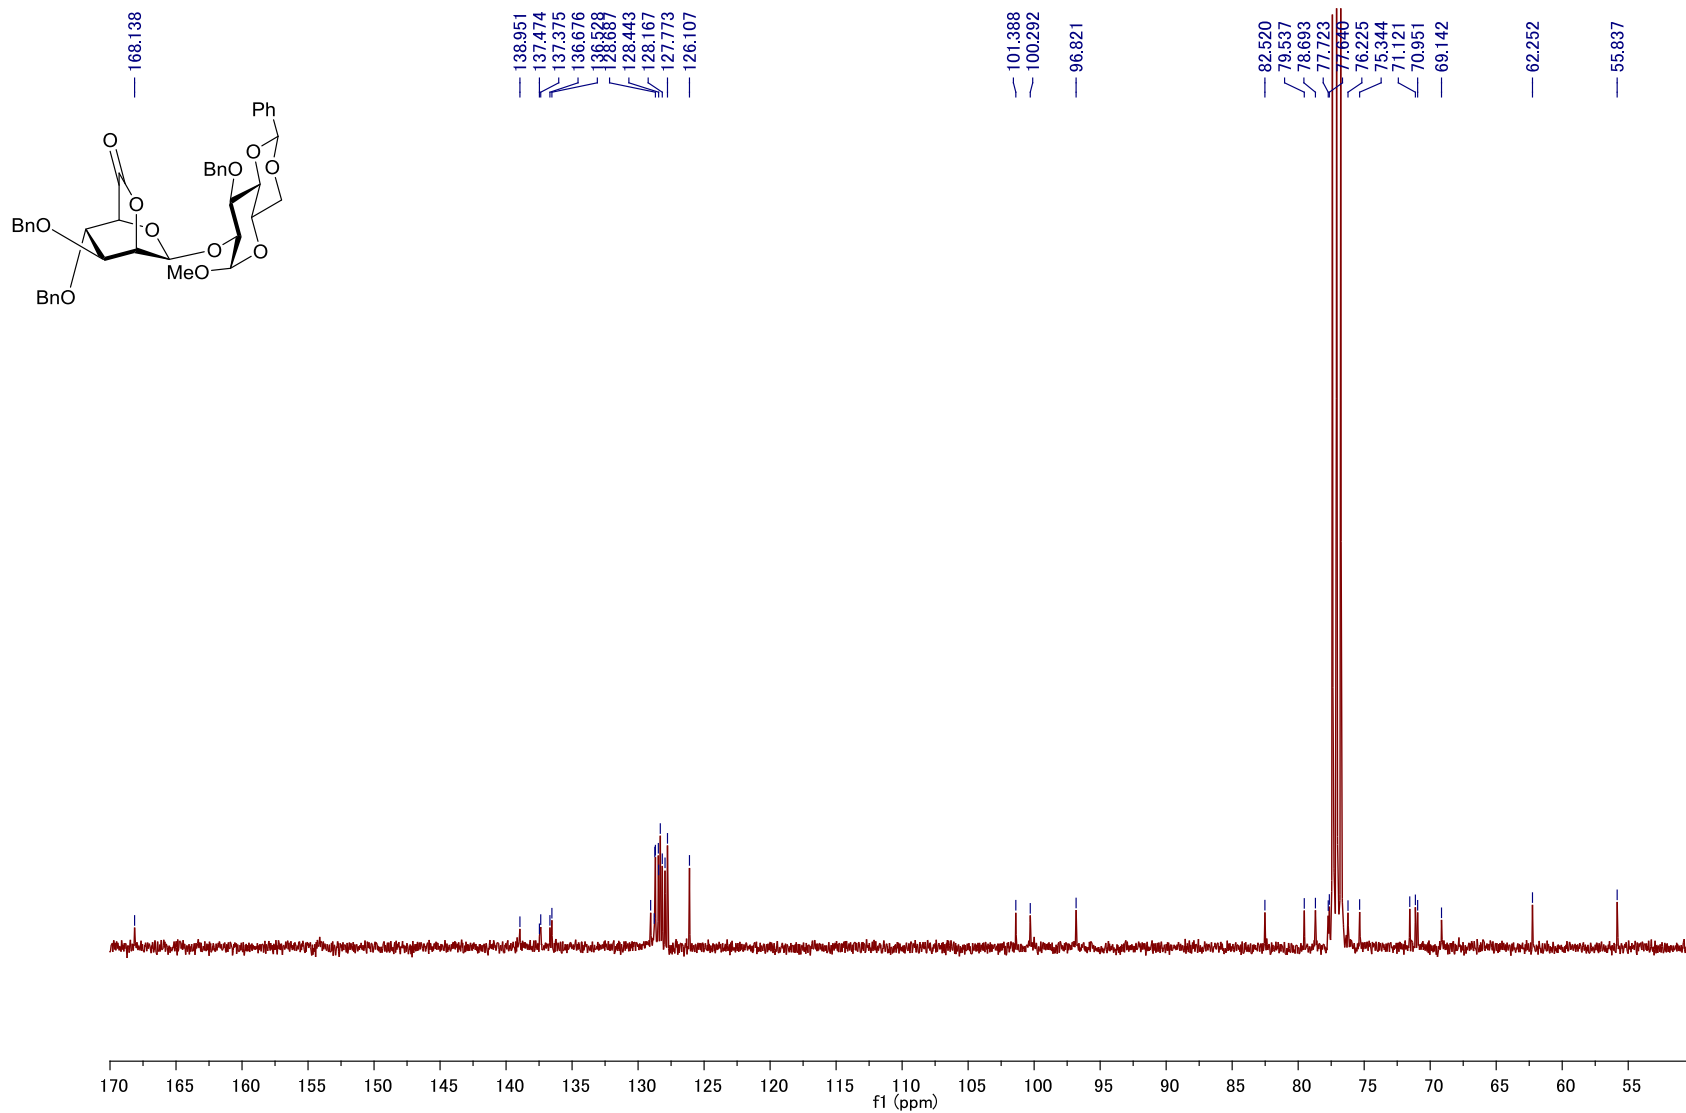

Methyl 2-*O*-(3',4'-di-*O*-benzyl- $\beta$ -D-mannopyranurono-2',6'-lacton-1'-yl)-3-*O*-benzyl-4,6-*O*-benzylidene-  
 $\alpha$ -D-glucopyranoside (7d $\beta$ )  $^1\text{H}$ - $^1\text{H}$  NOESY (400 MHz,  $\text{CDCl}_3$ )

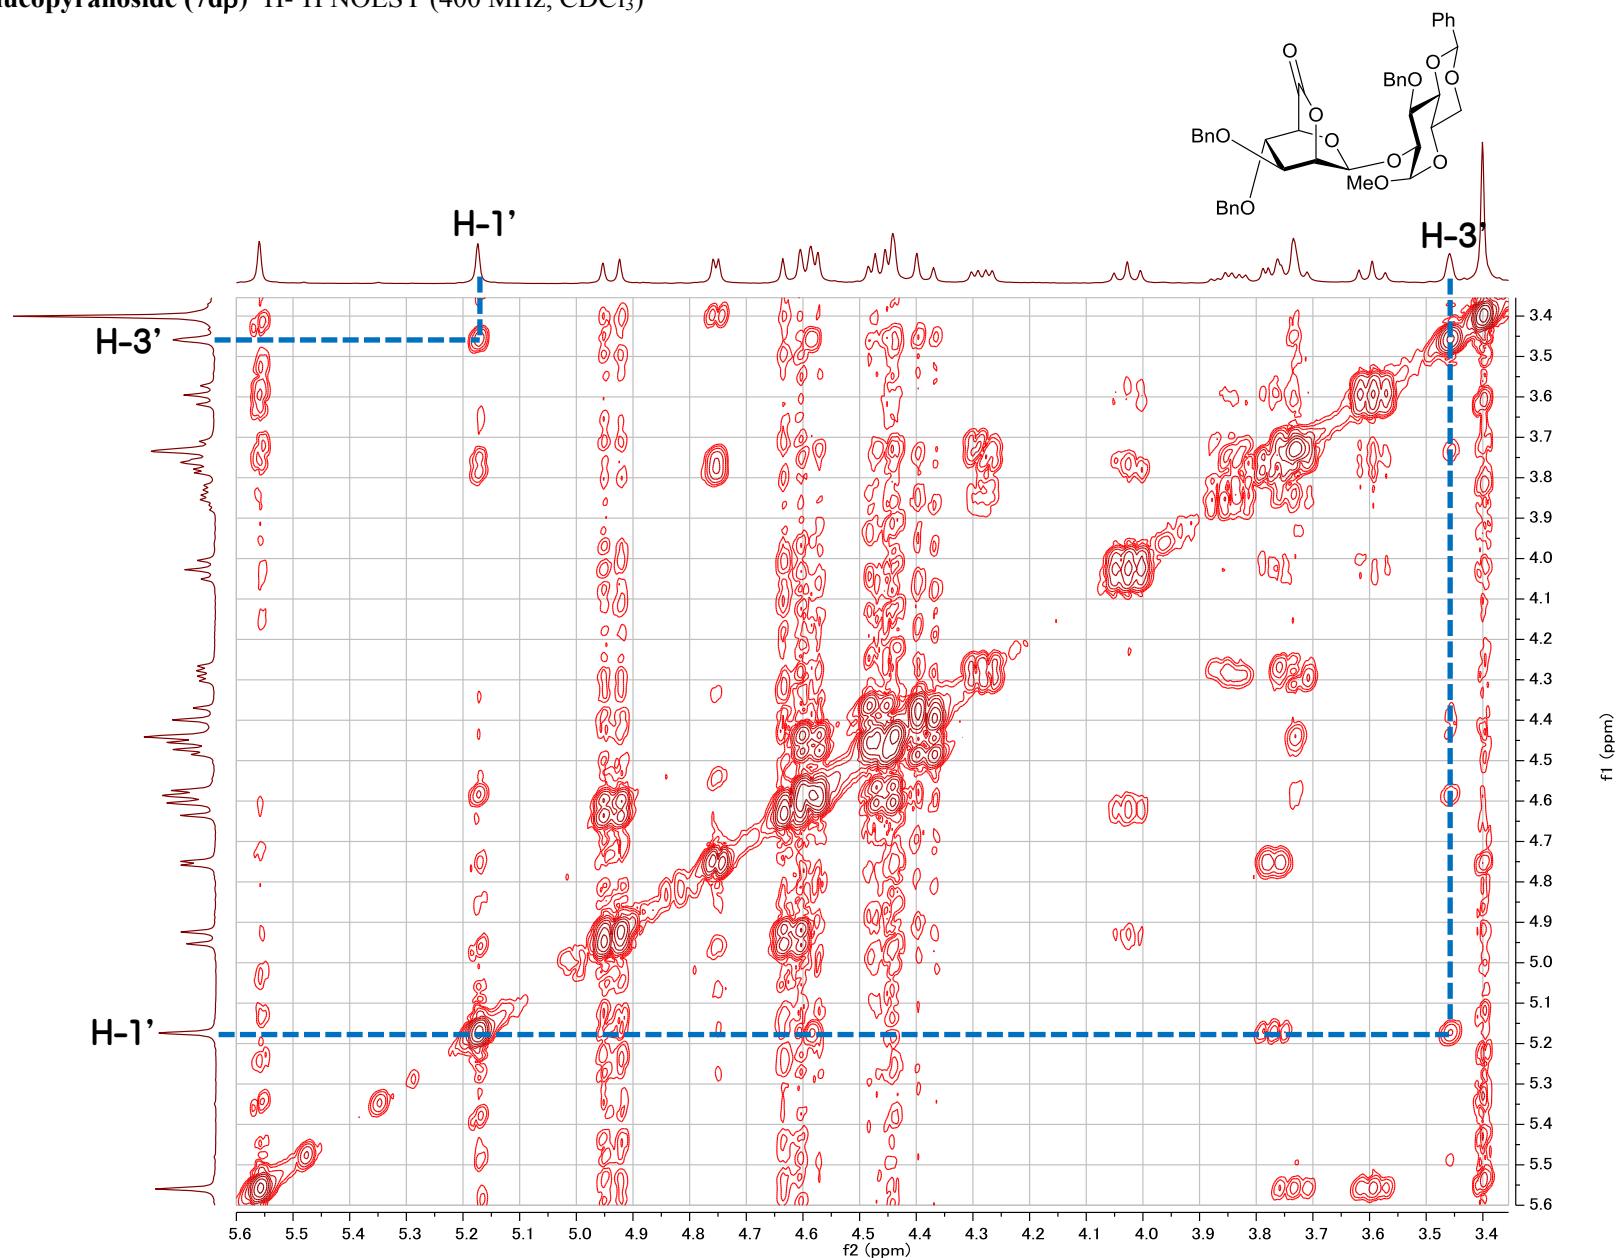



Methyl 2,3,6-tri-*O*-benzyl-4-*O*-(3',4'-di-*O*-benzyl- $\beta$ -D-mannopyranurono-2',6'-lacton-1'-yl)- $\alpha$ -D-glucopyranoside (7e $\beta$ )  $^1\text{H}$  NMR (400 MHz,  $\text{CDCl}_3$ )

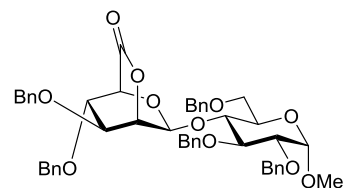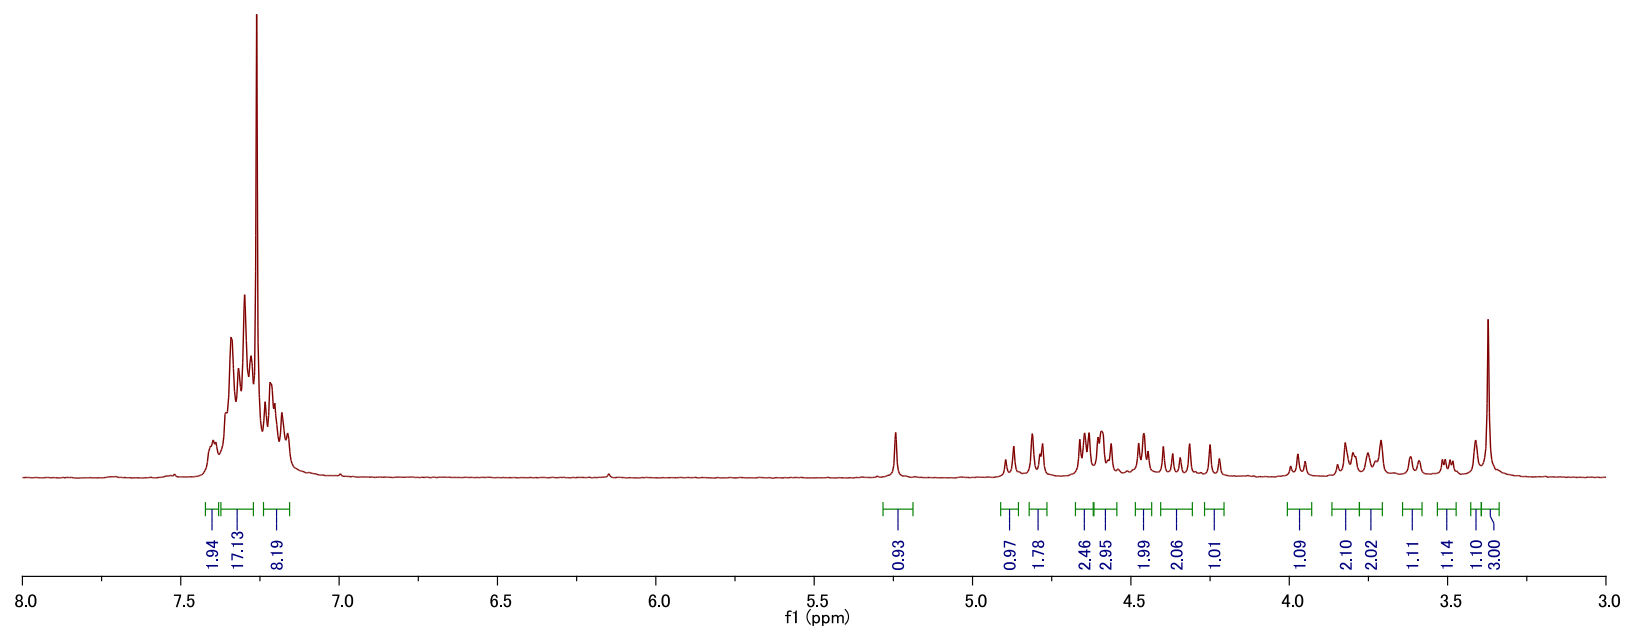

**Methyl 2,3,6-tri-*O*-benzyl-4-*O*-(3',4'-di-*O*-benzyl- $\beta$ -D-mannopyranurono-2',6'-lacton-1'-yl)- $\alpha$ -D-glucopyranoside (7e $\beta$ )**  $^{13}\text{C}$  NMR (100 MHz,  $\text{CDCl}_3$ )

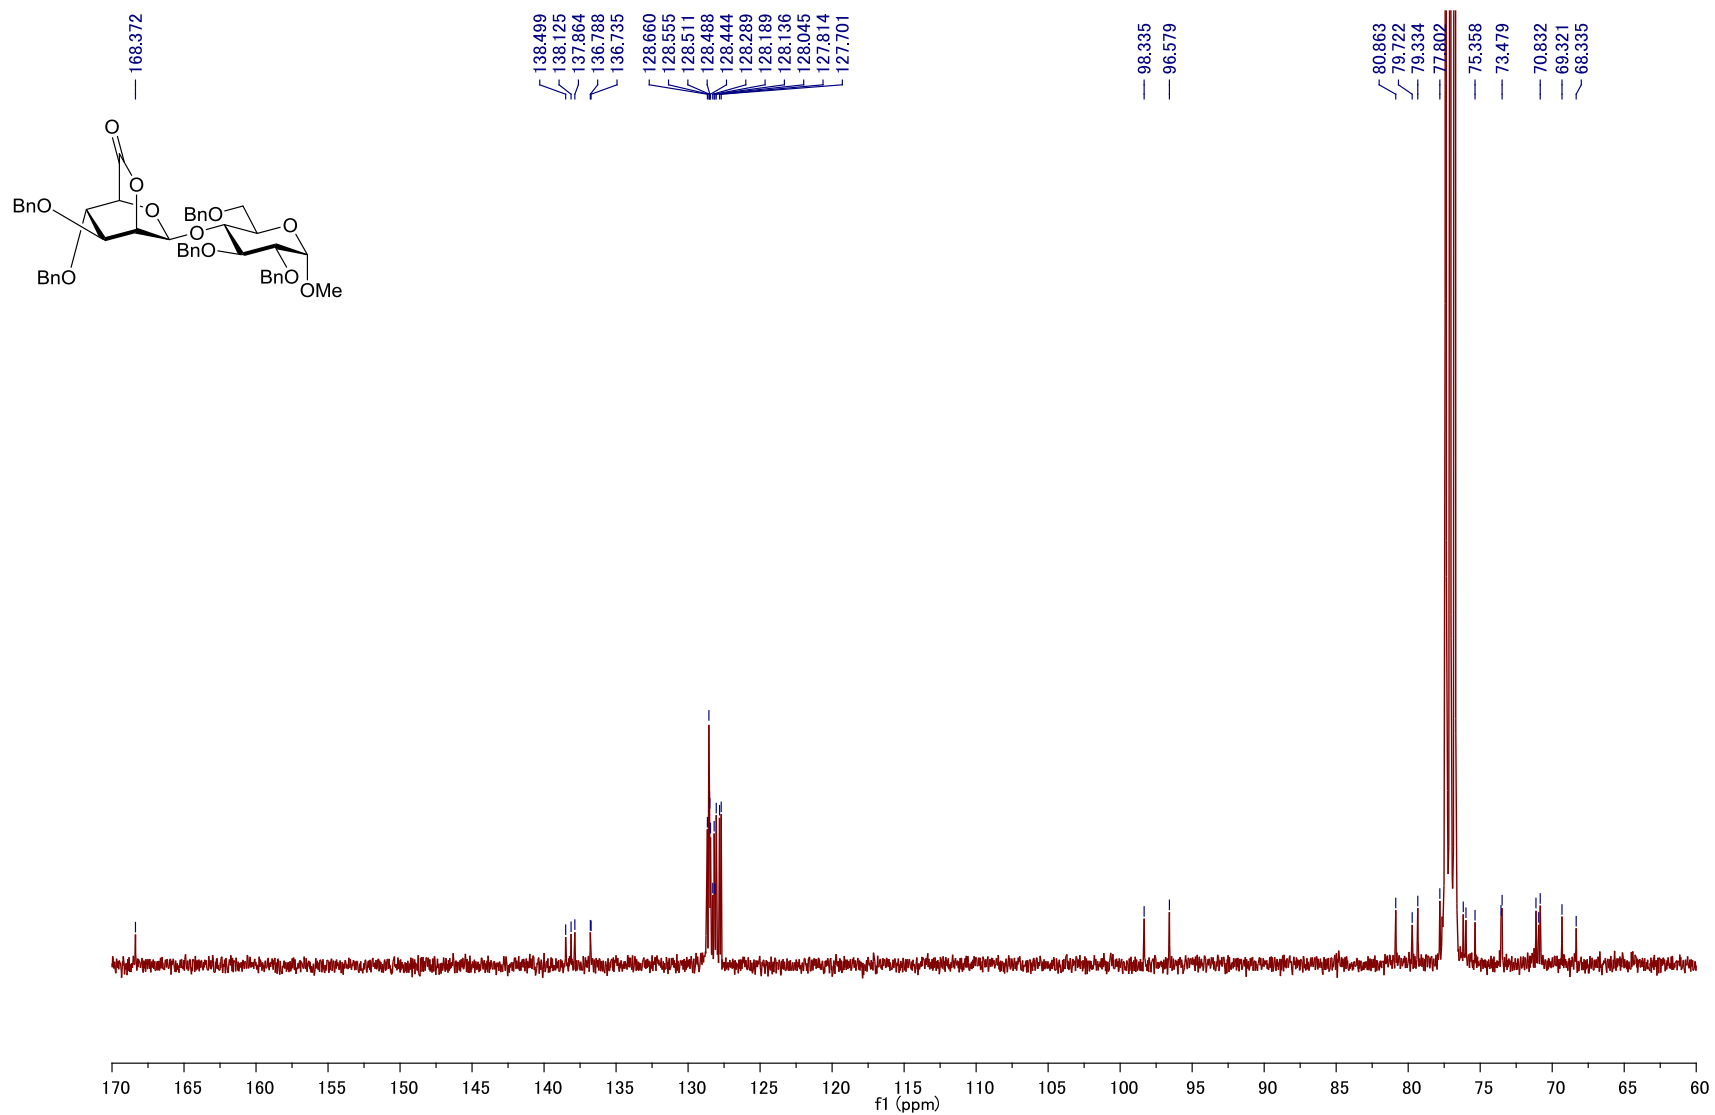

Methyl 2,3,6-tri-*O*-benzyl-4-*O*-(3',4'-di-*O*-benzyl- $\beta$ -D-mannopyranurono-2',6'-lacton-1'-yl)- $\alpha$ -D-glucopyranoside (**7e** $\beta$ )  $^1\text{H}$ - $^1\text{H}$  NOESY (400 MHz,  $\text{CDCl}_3$ )

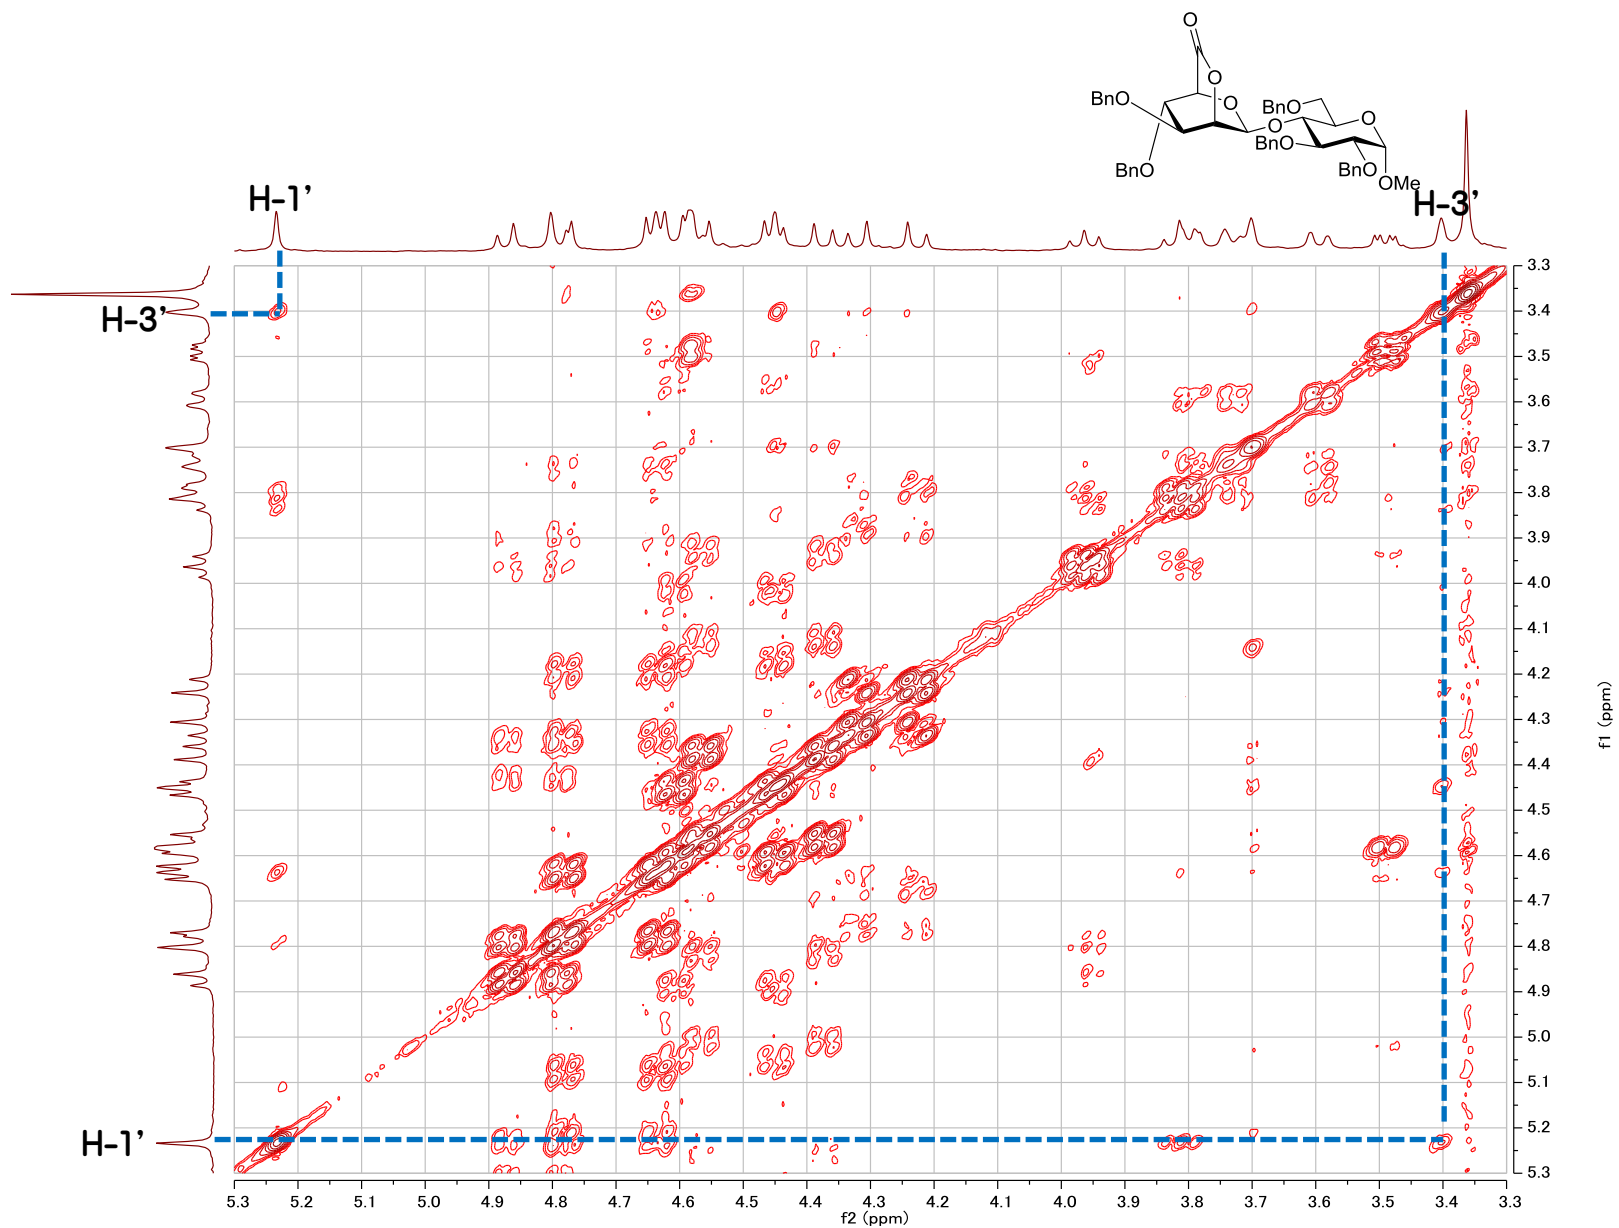

# Methyl

2,3,4-tri-*O*-benzyl-6-*O*-(3'-di-*O*-benzyl-4'-*O*-*tert*-butyldimethylsilyl- $\beta$ -D-mannopyranurono-2',6'-lacton-1'-yl)- $\alpha$ -D-glucopyranoside (7f $\beta$ )  $^1\text{H}$  NMR (400 MHz,  $\text{CDCl}_3$ )

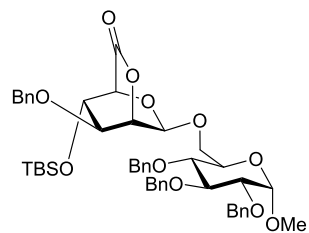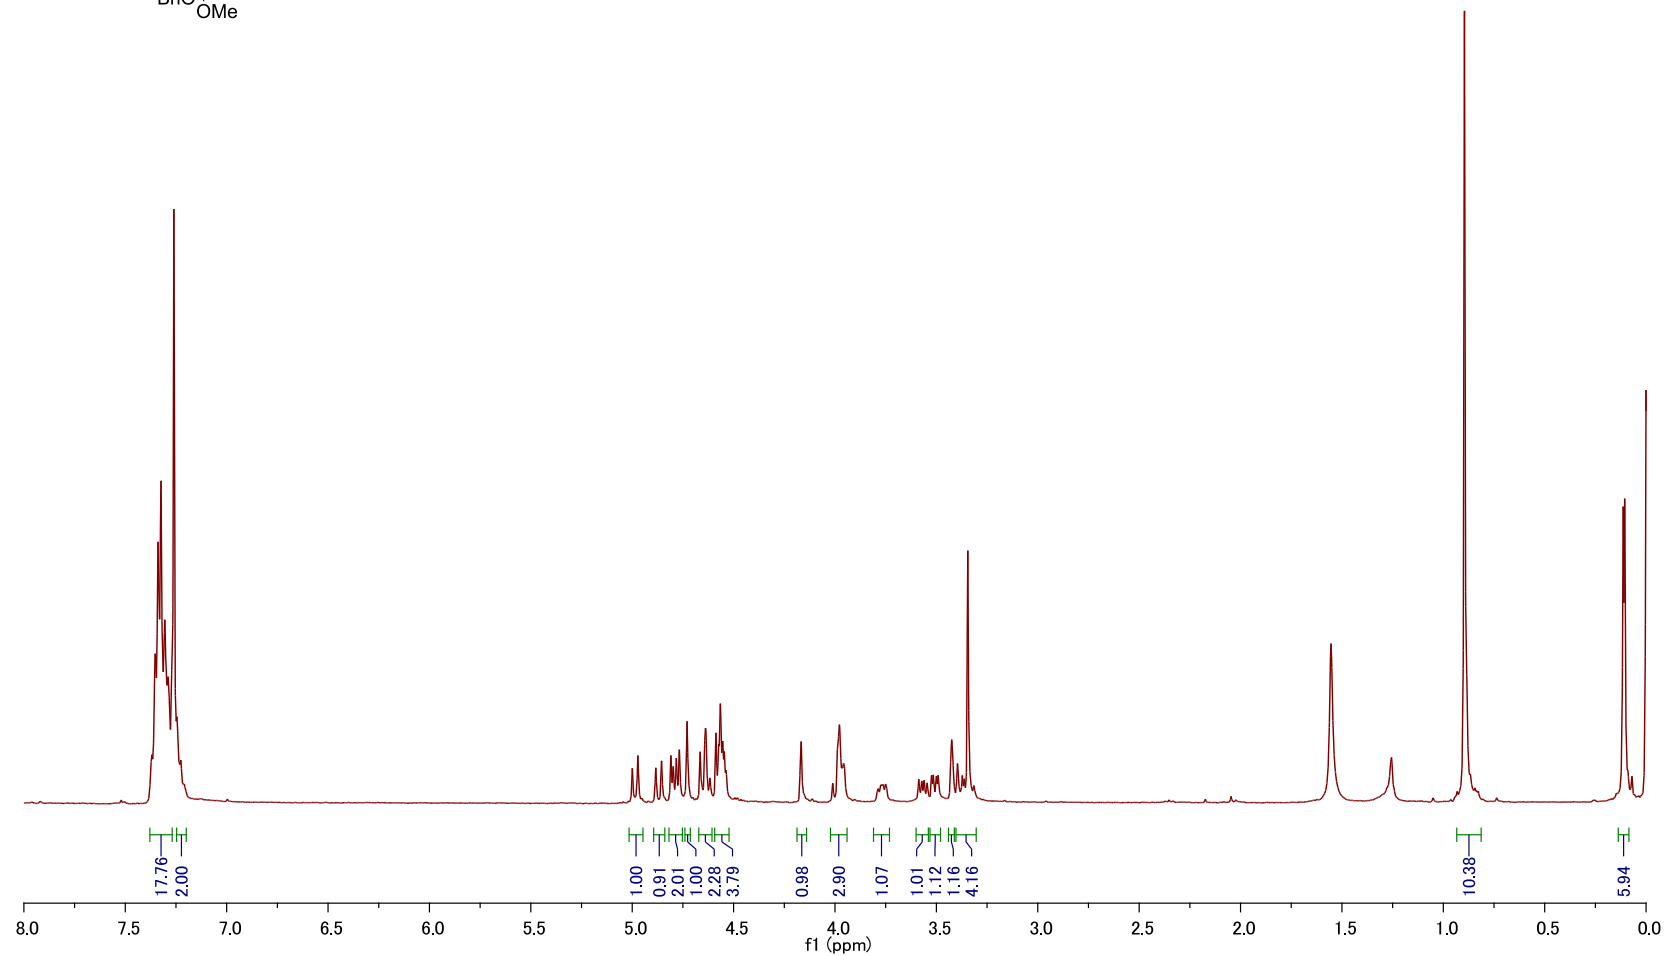

# Methyl

2,3,4-tri-*O*-benzyl-6-*O*-(3'-di-*O*-benzyl-4'-*O*-*tert*-butyldimethylsilyl- $\beta$ -D-mannopyranurono-2',6'-lacton-1'-yl)- $\alpha$ -D-glucopyranoside (**7f $\beta$** )  $^{13}\text{C}$  NMR (100 MHz,  $\text{CDCl}_3$ )

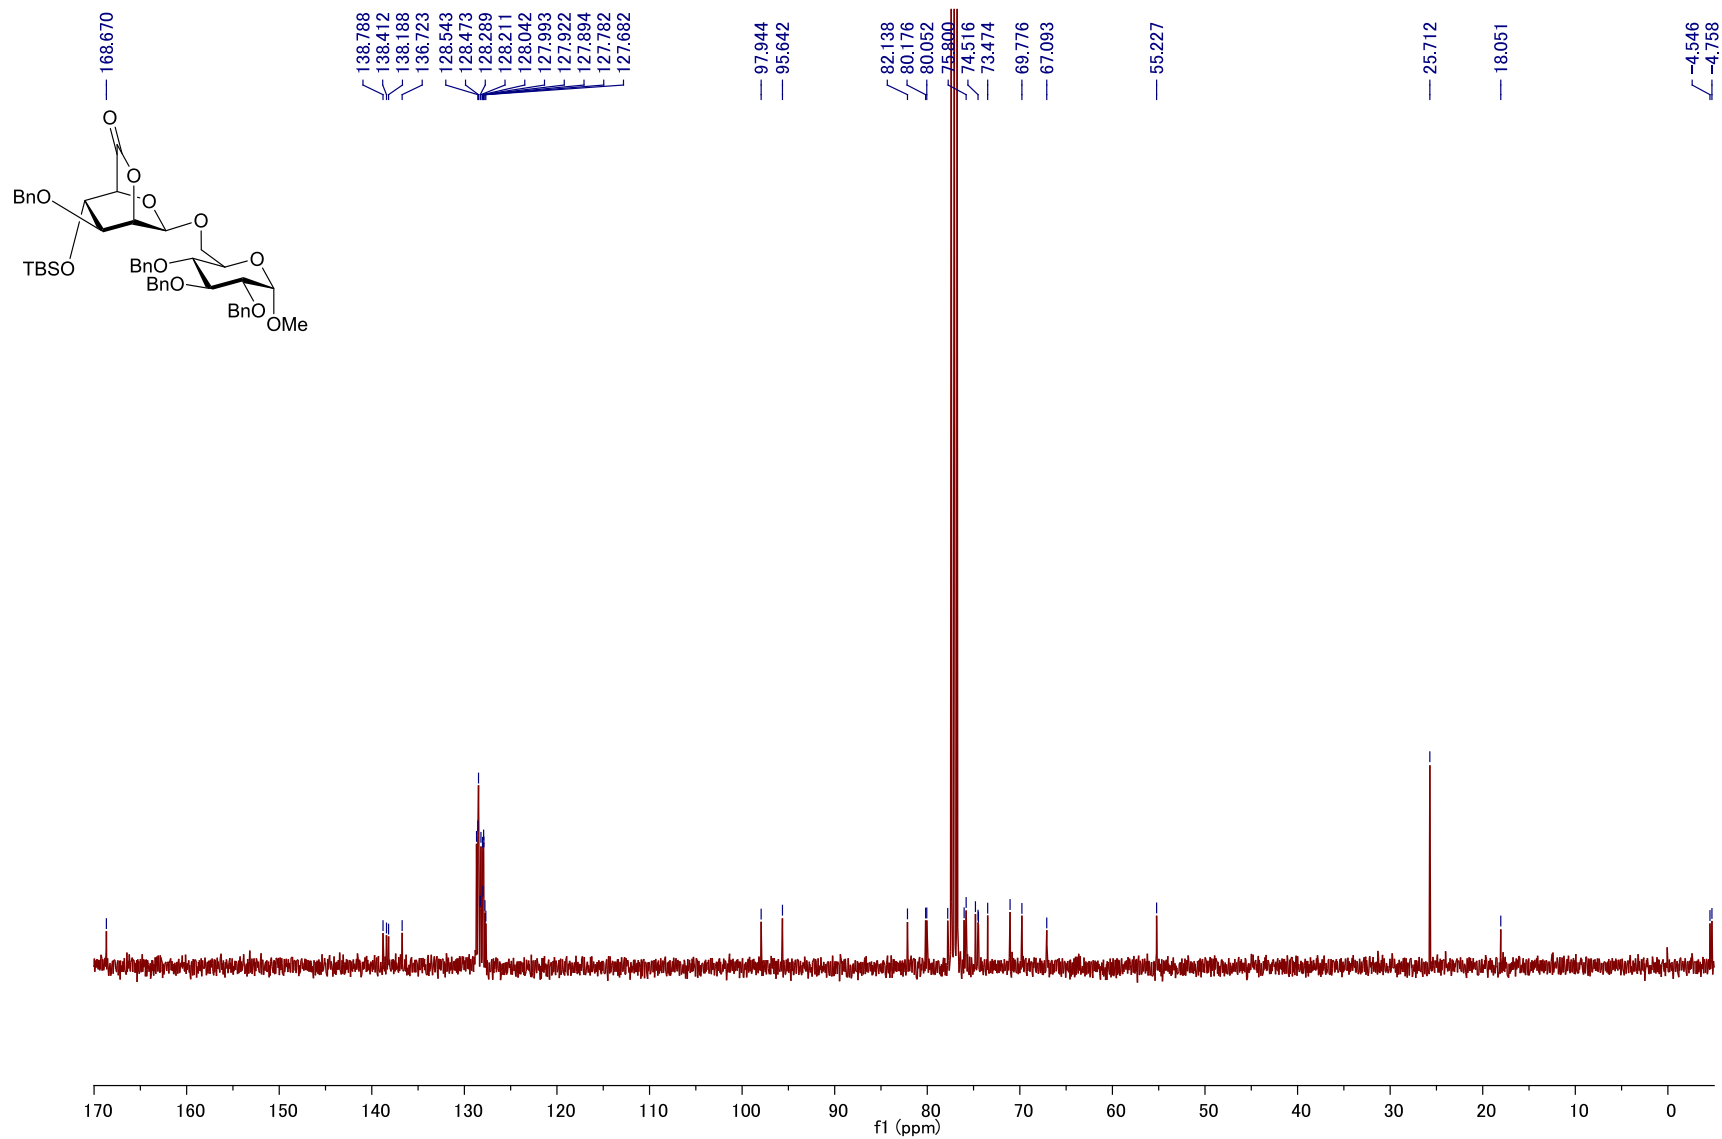

Methyl 2,3,4-tri-*O*-benzyl-6-*O*-(3'-di-*O*-benzyl-4'-*O*-*tert*-butyldimethylsilyl- $\beta$ -D-mannopyranurono-2',6'-lacton-1'-yl)- $\alpha$ -D-glucopyranoside (7f $\beta$ )  $^1\text{H}$ - $^1\text{H}$  NOESY (400 MHz,  $\text{CDCl}_3$ )

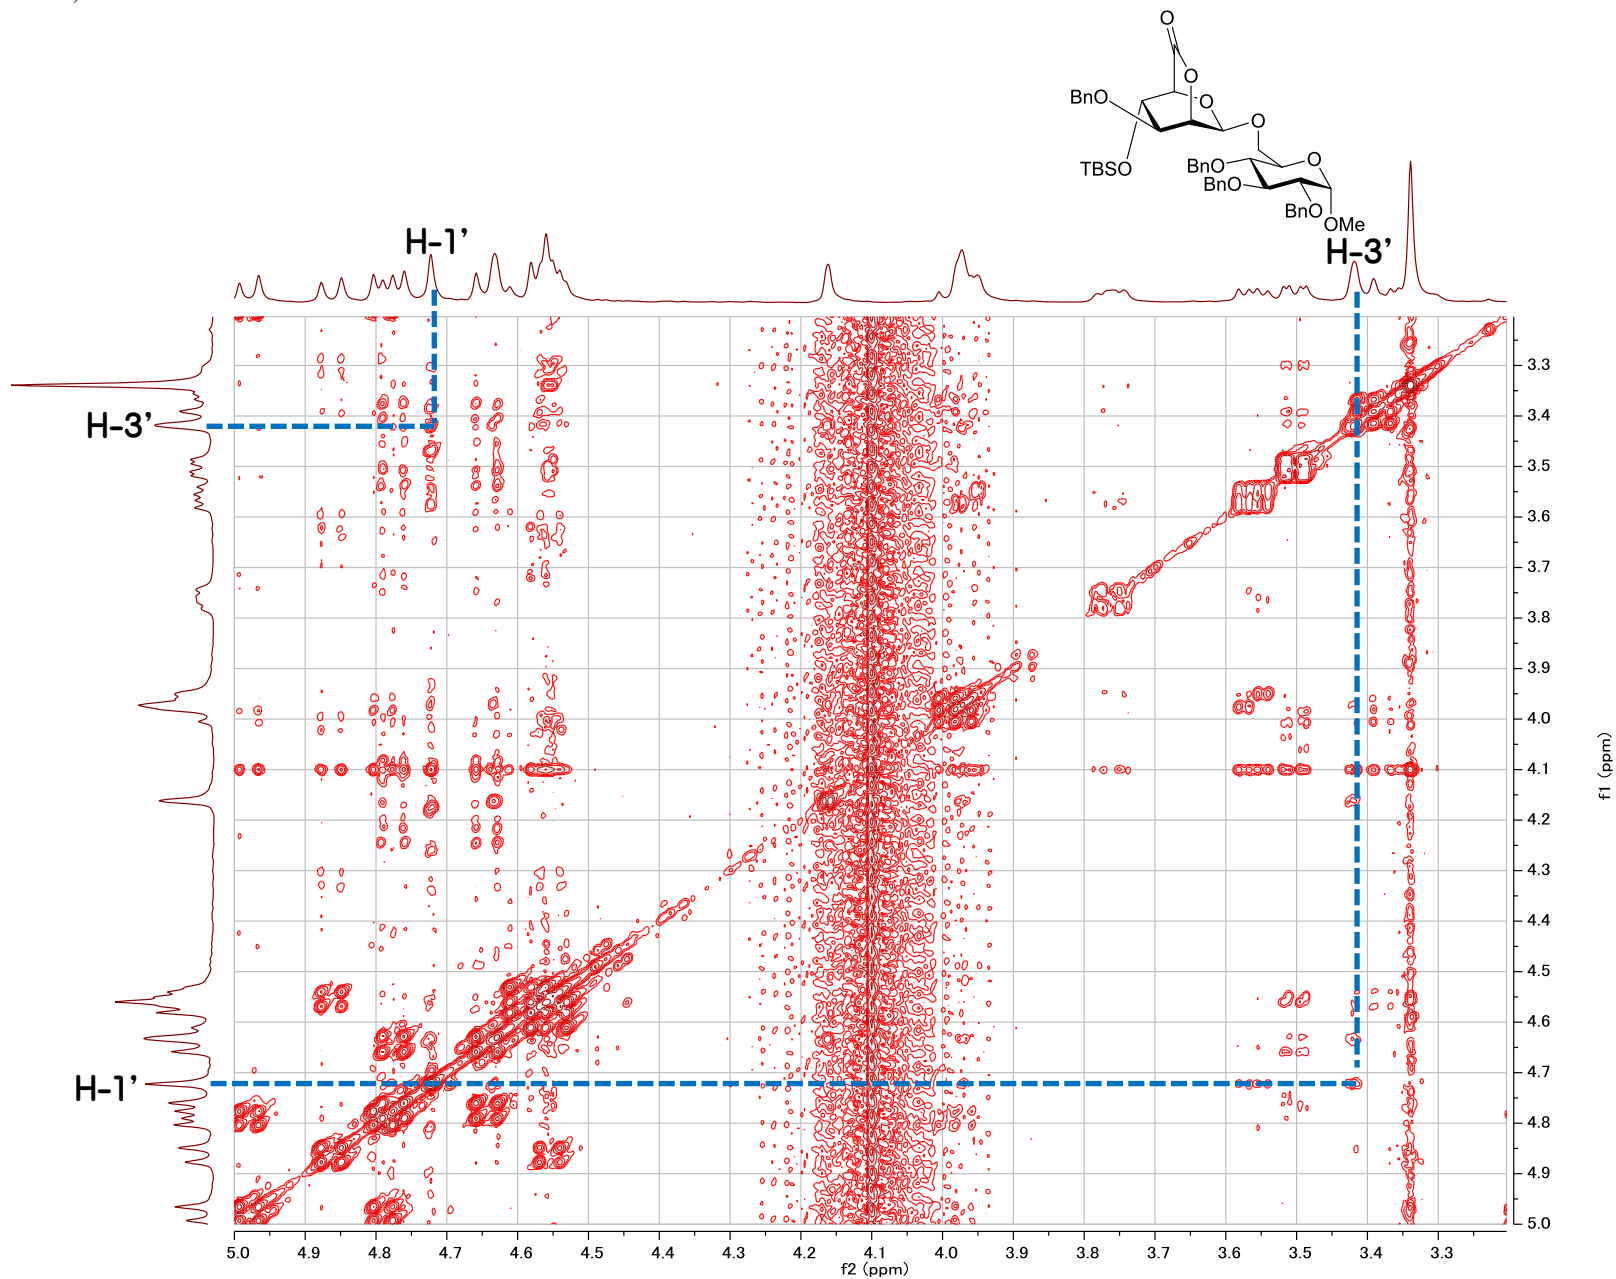

## Methyl

2,3,4-tri-*O*-benzyl-6-*O*-(3'-di-*O*-benzyl-4'-*O*-*tert*-butyldimethylsilyl- $\alpha$ -D-mannopyranurono-2',6'-lacton-1'-yl)- $\alpha$ -D-glucopyranoside (7f $\alpha$ )  $^1\text{H}$  NMR (400 MHz,  $\text{CDCl}_3$ )

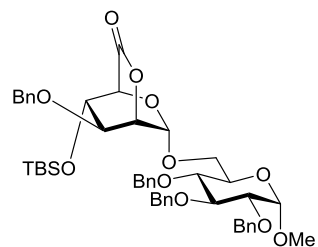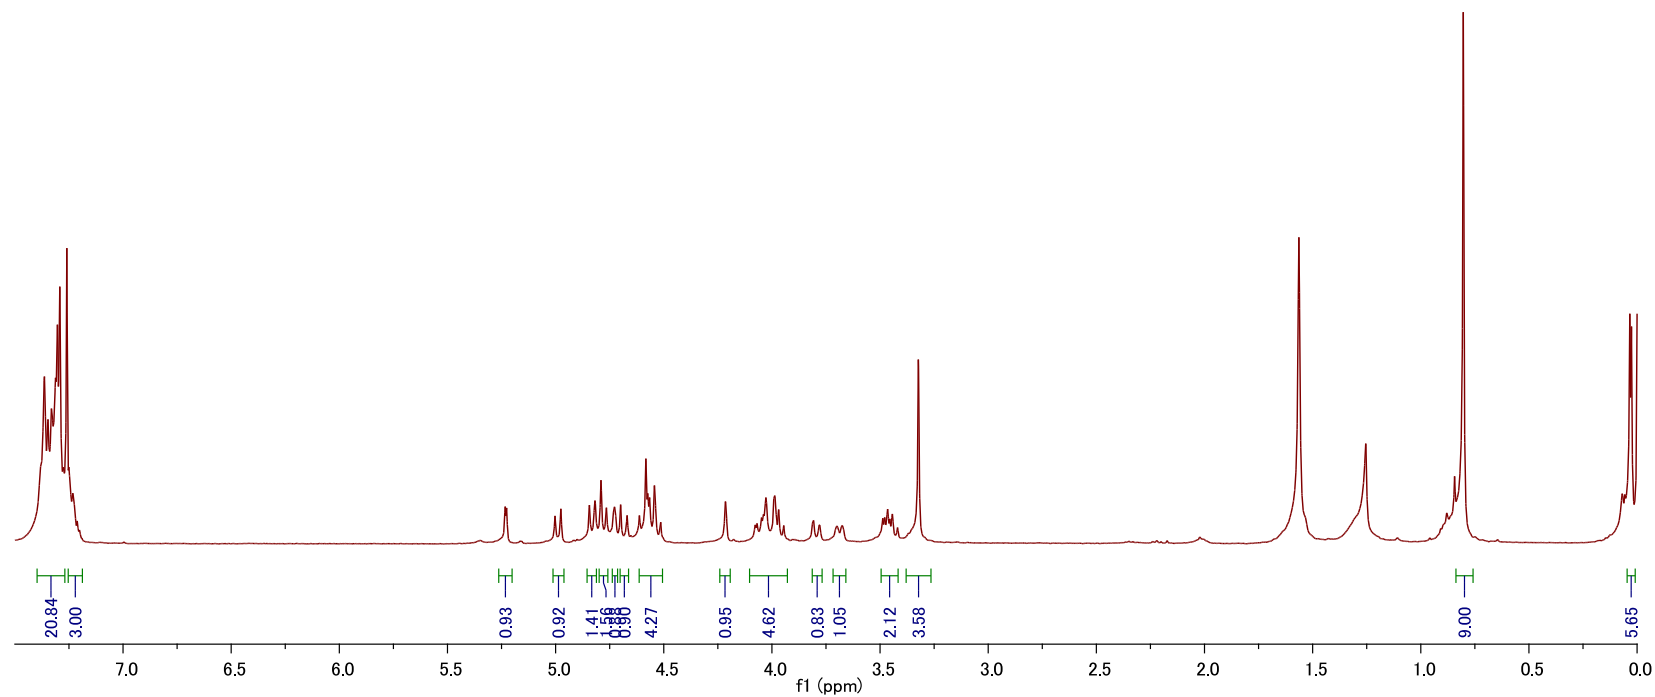

# Methyl

2,3,4-tri-*O*-benzyl-6-*O*-(3'-di-*O*-benzyl-4'-*O*-*tert*-butyldimethylsilyl- $\alpha$ -D-mannopyranurono-2',6'-lacton-1'-yl)- $\alpha$ -D-glucopyranoside (7f $\alpha$ )  $^{13}\text{C}$  NMR (100 MHz,  $\text{CDCl}_3$ )

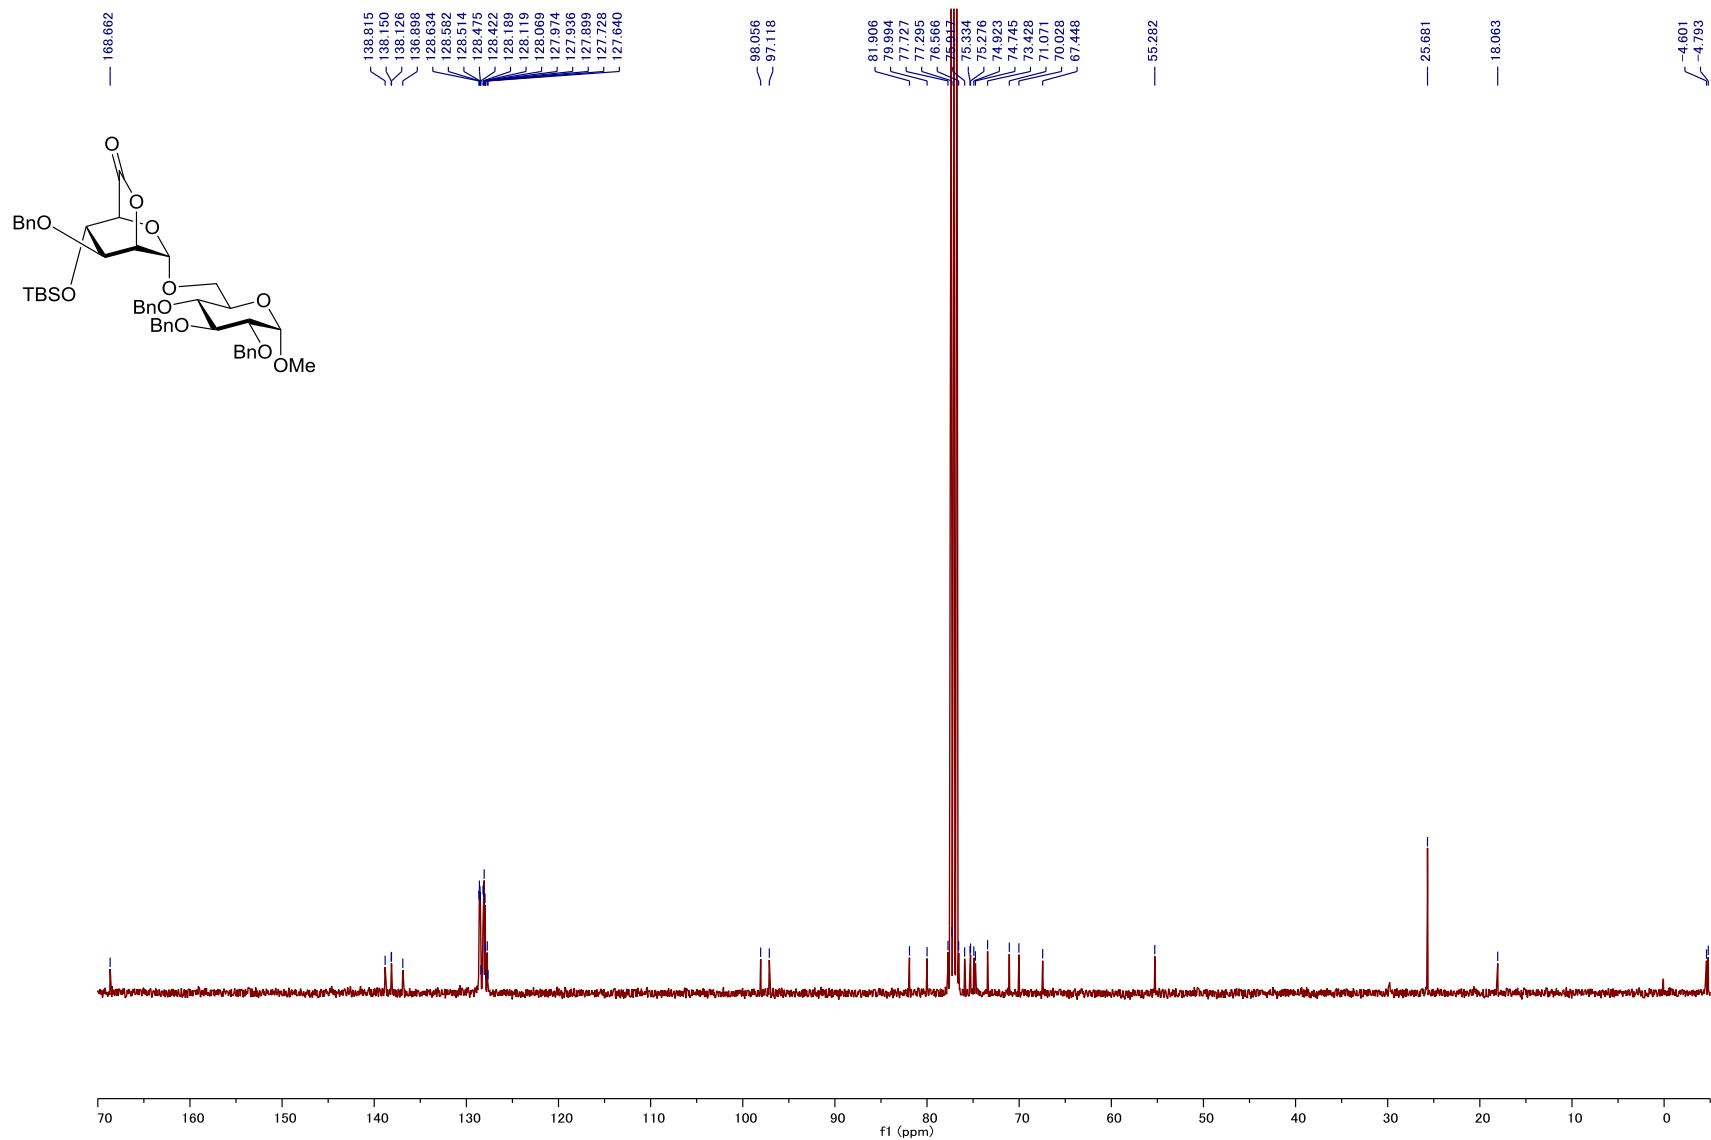



**2,6-Di-*O*-acetyl-3,4-di-*O*-benzyl-D-mannopyranosyl diphenylphosphate (S3)**  $^1\text{H}$  NMR (400 MHz,  $\text{CDCl}_3$ )

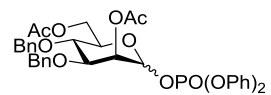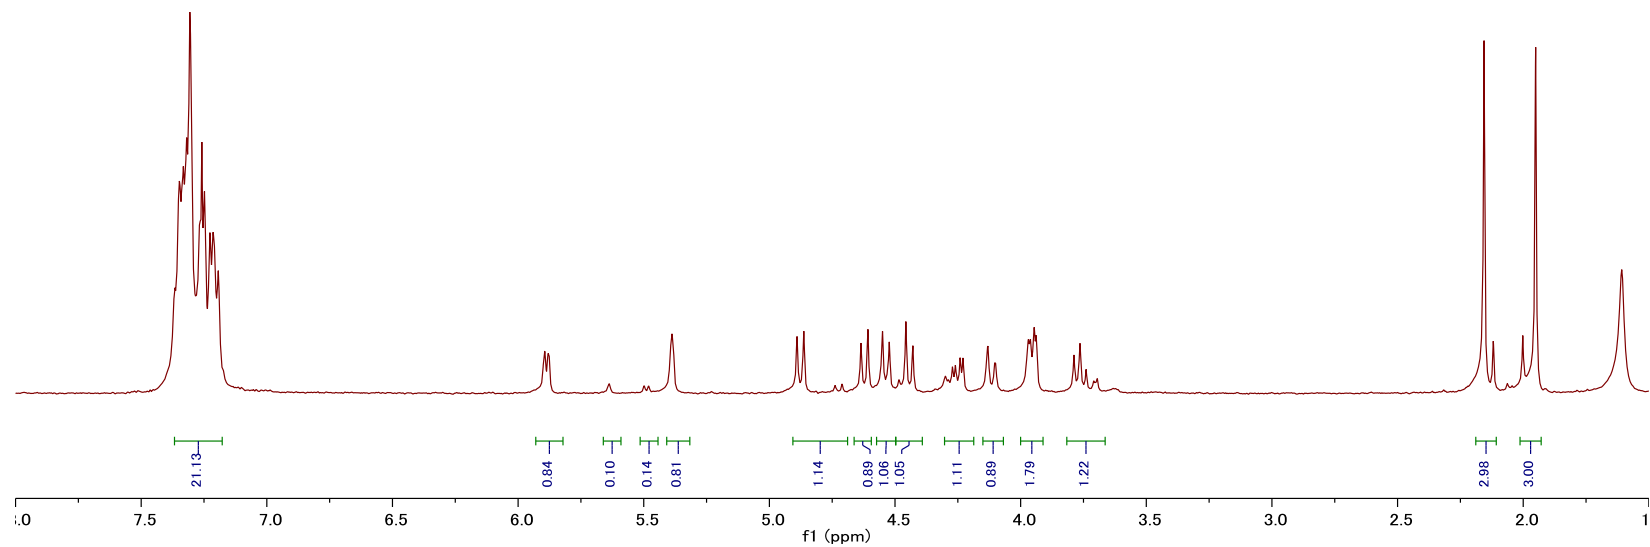

**2,6-Di-*O*-acethyl-3,4-di-*O*-benzyl-D-mannopyranosyl diphenylphosphate (S3)**  $^{13}\text{C}$  NMR (100 MHz,  $\text{CDCl}_3$ )

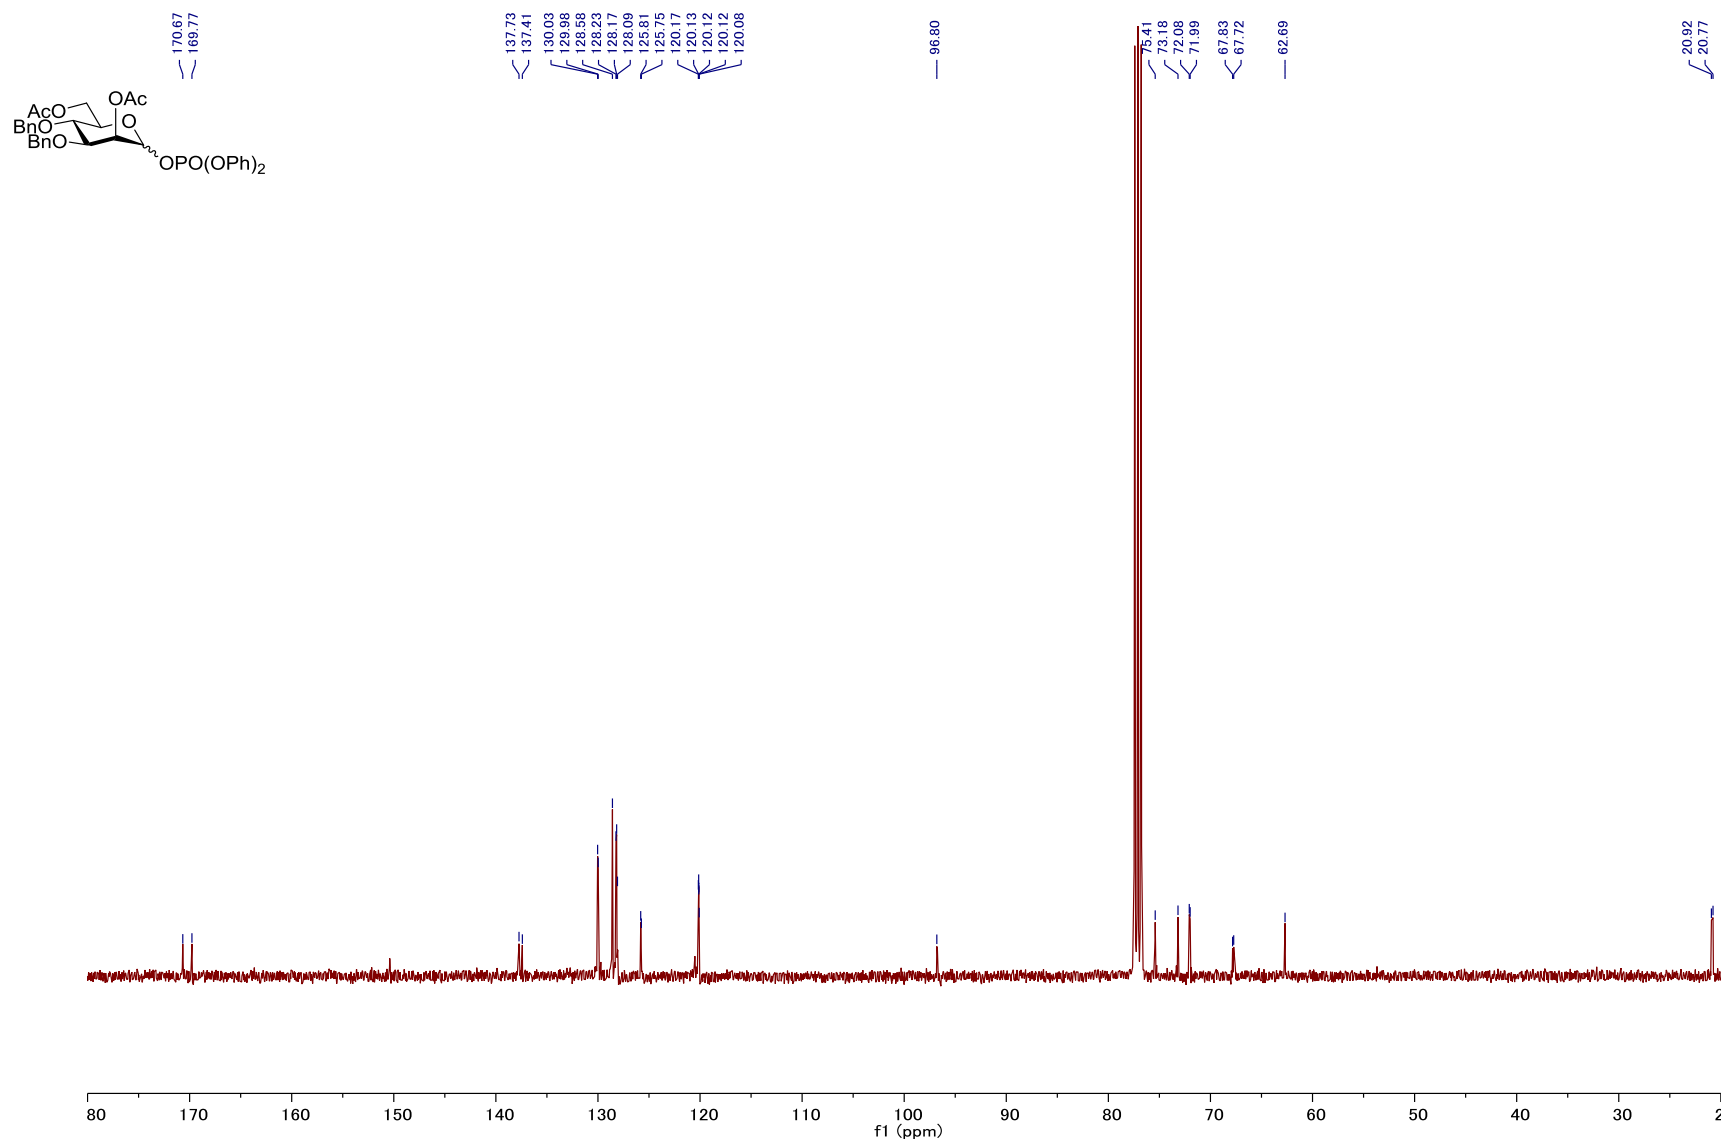

**2,3-*O*-isopropylidene-4-*O*-(2',6'-di-*O*-acetyl-3',4'-di-*O*-benzyl- $\alpha$ -D-mannopyranosyl)- $\alpha$ -L-rhamnopyranoside (S4b)** <sup>1</sup>H NMR (400 MHz, CDCl<sub>3</sub>)

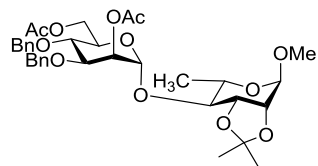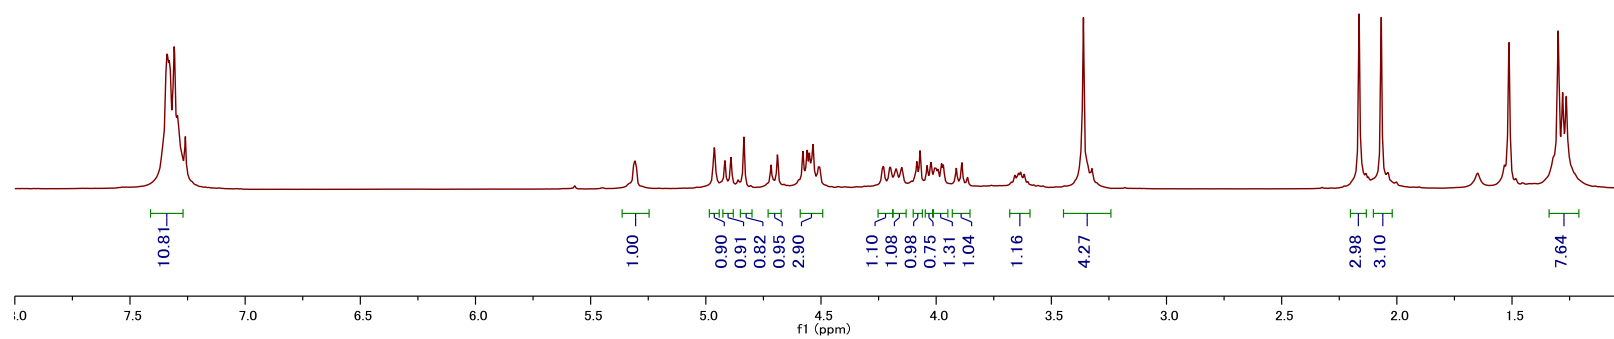

# Methyl

**2,3-*O*-isopropylidene-4-*O*-(2',6'-di-*O*-acetyl-3',4'-di-*O*-benzyl- $\alpha$ -D-mannopyranosyl)- $\alpha$ -L-rhamnopyranoside (S4b)**  $^{13}\text{C}$  NMR (100 MHz,  $\text{CDCl}_3$ )

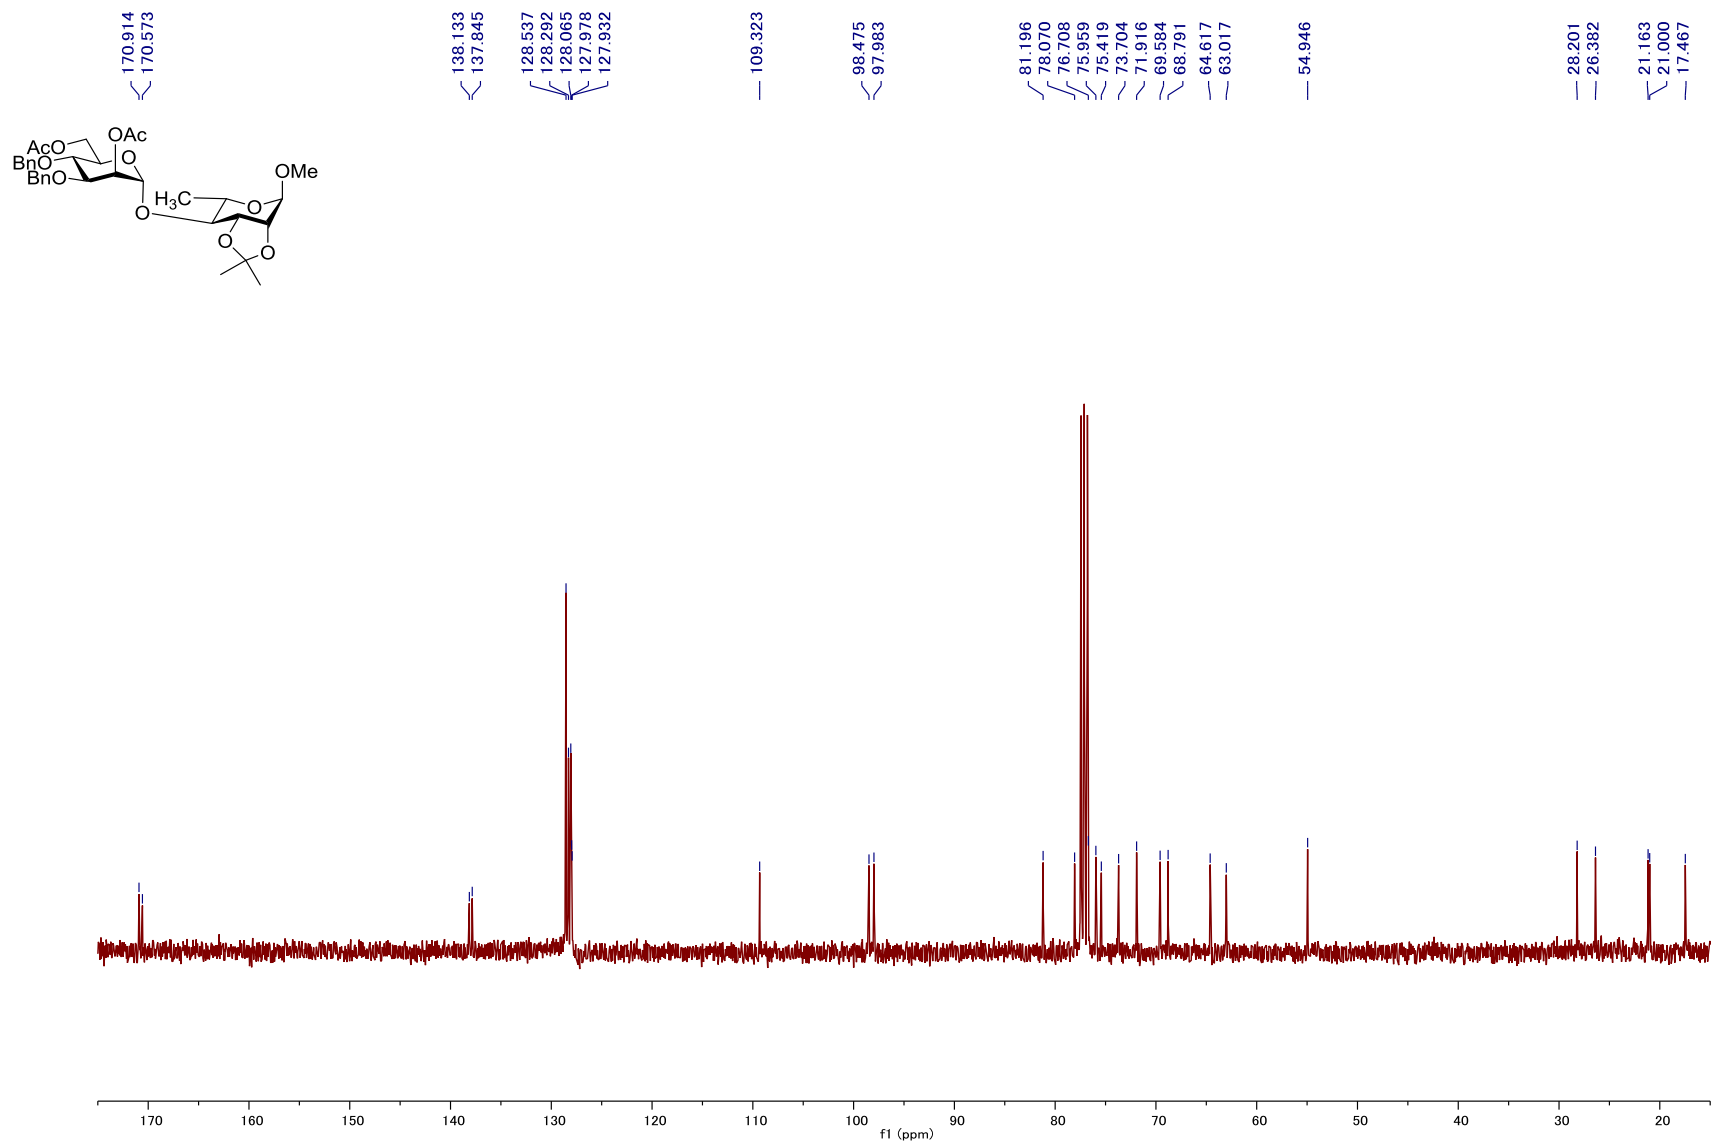

## Allyl

**2-*O*-(2',6'-di-*O*-acetyl-3',4'-di-*O*-benzyl- $\alpha$ -D-mannopyranosyl)-3-*O*-benzyl-4,6-*O*-benzylidene- $\alpha$ -D-mannopyranoside (S4c)**  $^1\text{H}$  NMR (400 MHz,  $\text{CDCl}_3$ )

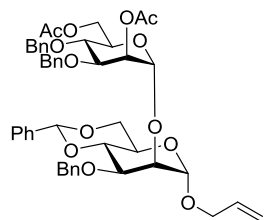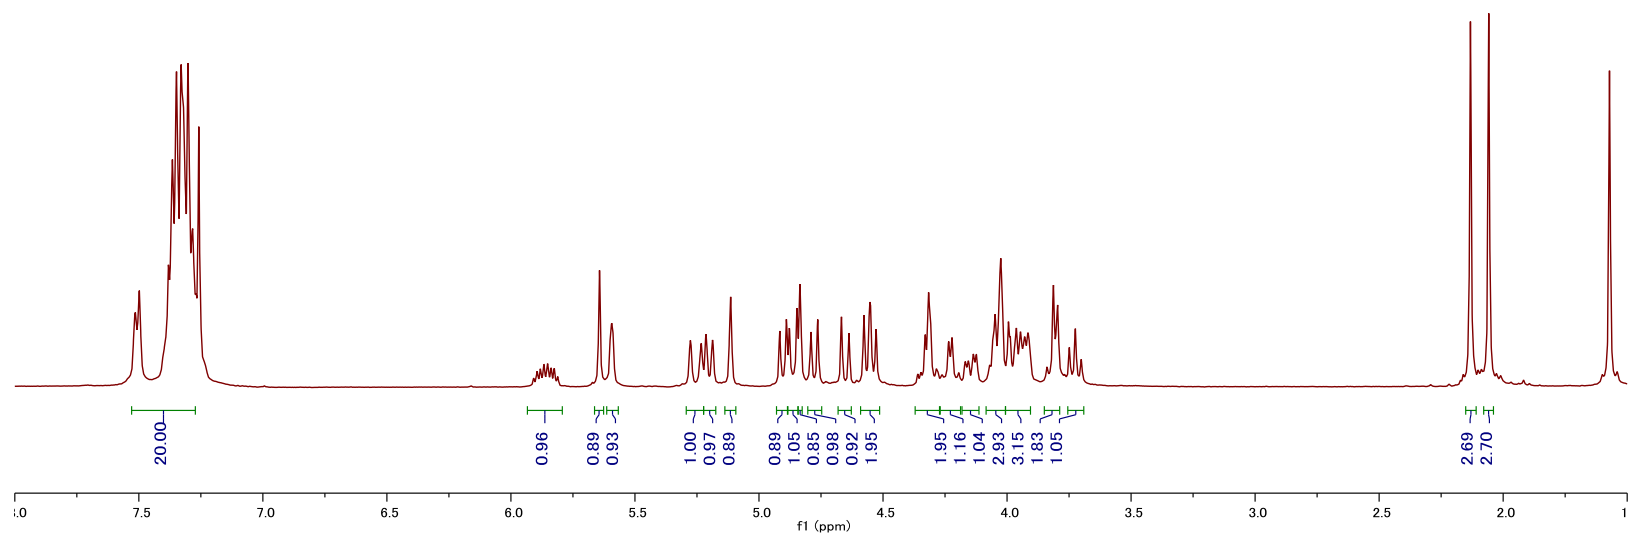

# Allyl

**2-*O*-(2',6'-di-*O*-acetyl-3',4'-di-*O*-benzyl- $\alpha$ -D-mannopyranosyl)-3-*O*-benzyl-4,6-*O*-benzylidene- $\alpha$ -D-mannopyranoside (S4c)**  $^{13}\text{C}$  NMR (100 MHz,  $\text{CDCl}_3$ )

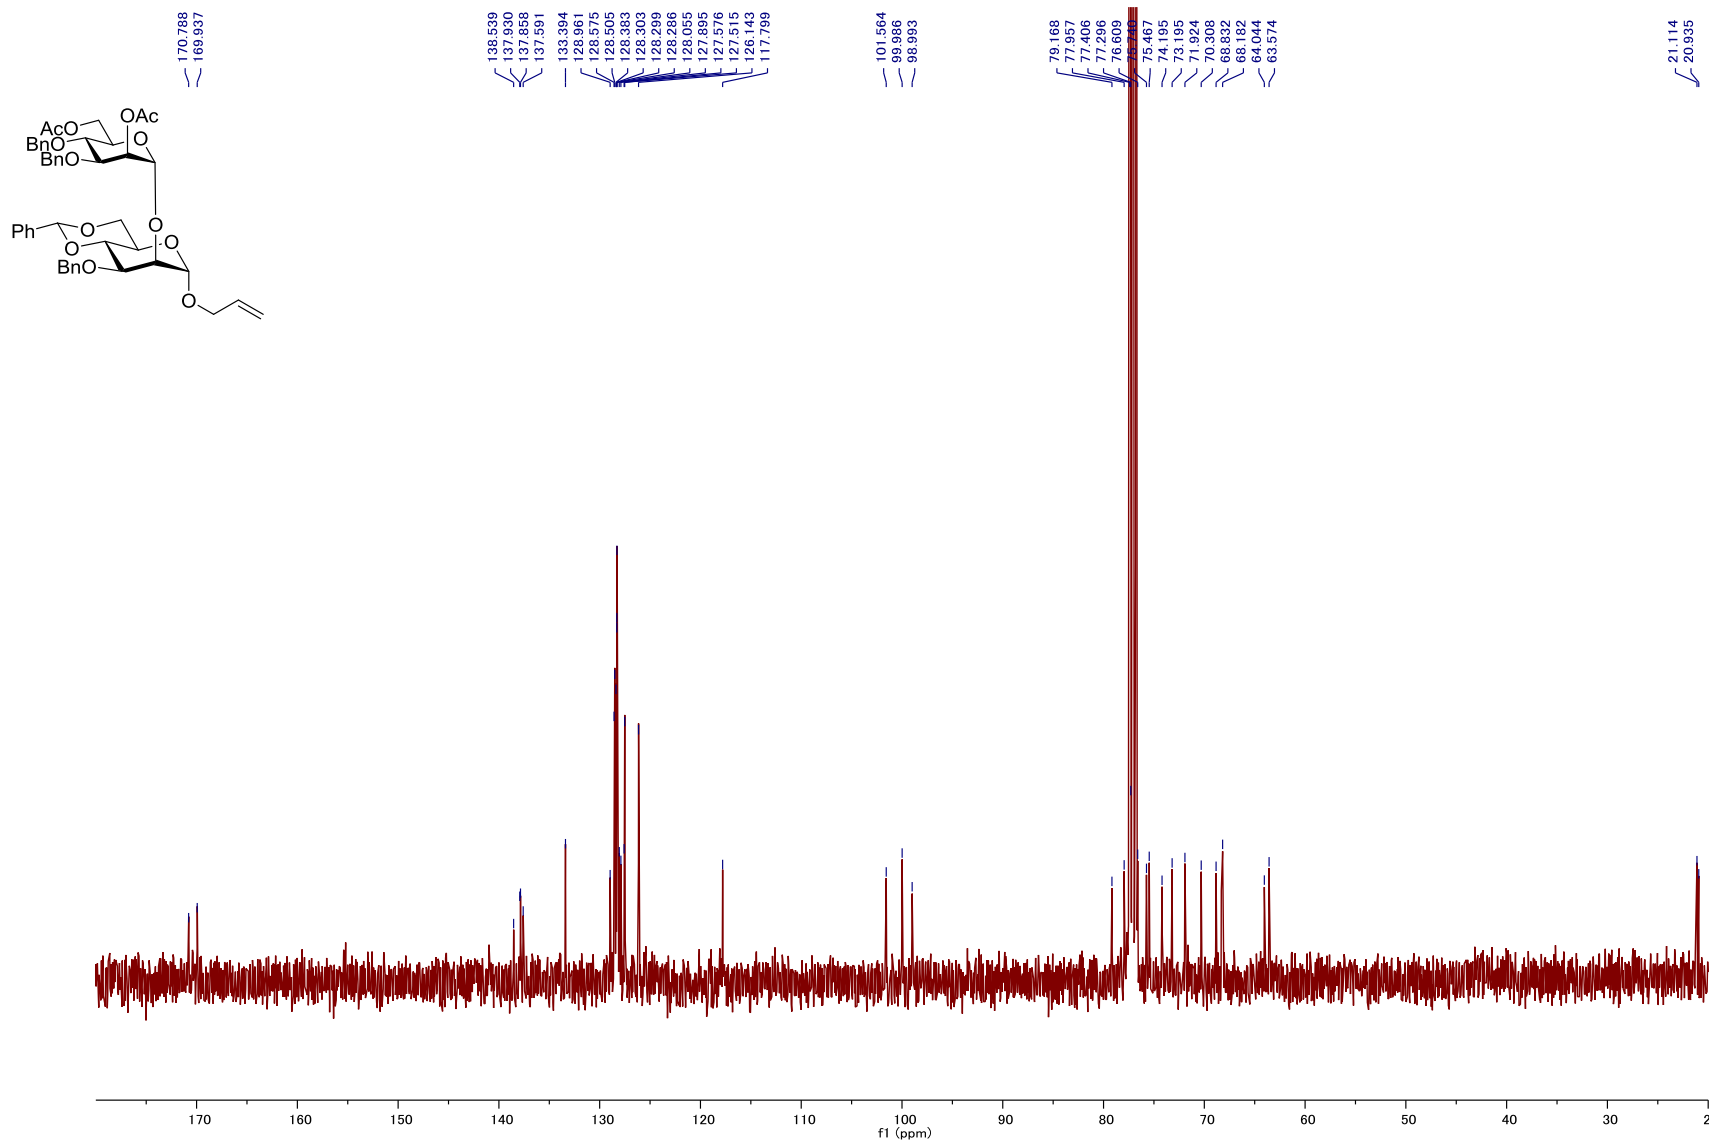

# Methyl

**2-*O*-(2',6'-di-*O*-acetyl-3',4'-di-*O*-benzyl- $\alpha$ -D-mannopyranosyl)-3-*O*-benzyl-4,6-*O*-benzylidene- $\alpha$ -D-glucopyranoside (S4d)**  $^1\text{H}$  NMR (400 MHz,  $\text{CDCl}_3$ )

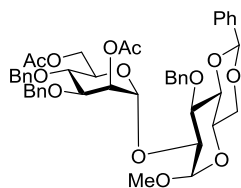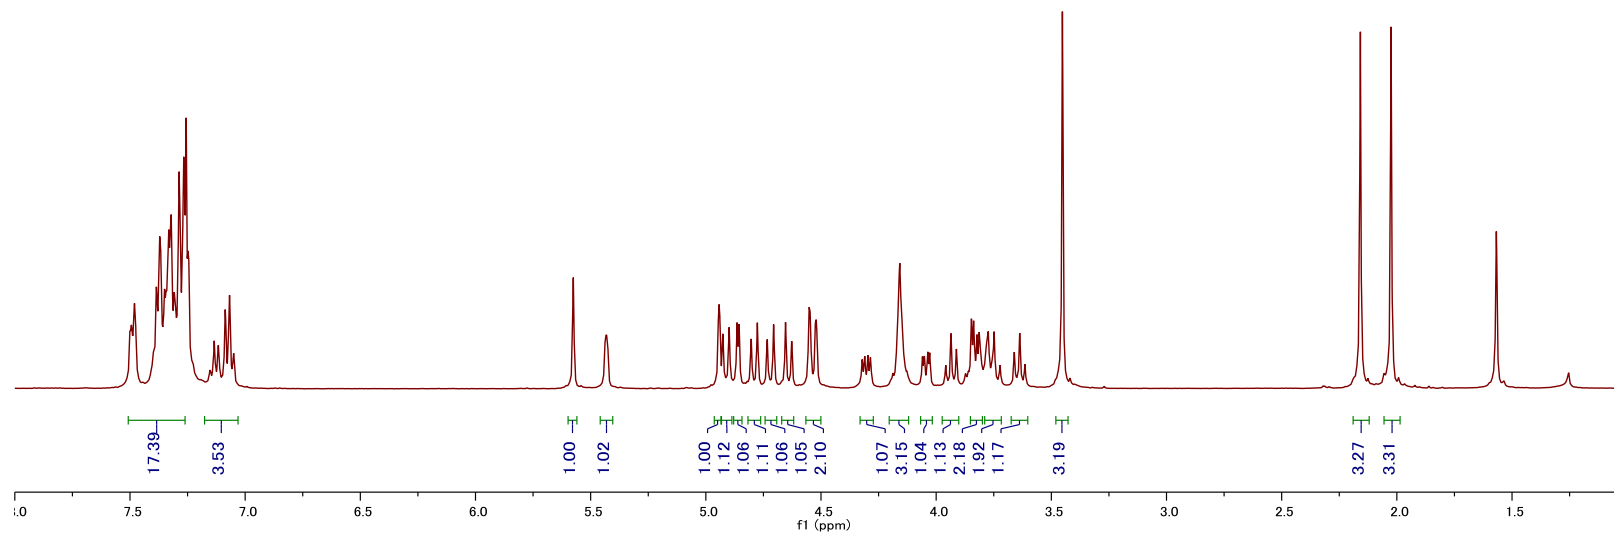

# Methyl

2-*O*-(2',6'-di-*O*-acetyl-3',4'-di-*O*-benzyl- $\alpha$ -D-mannopyranosyl)-3-*O*-benzyl-4,6-*O*-benzylidene- $\alpha$ -D-glucopyranoside (S4d)  $^{13}\text{C}$  NMR (100 MHz,  $\text{CDCl}_3$ )

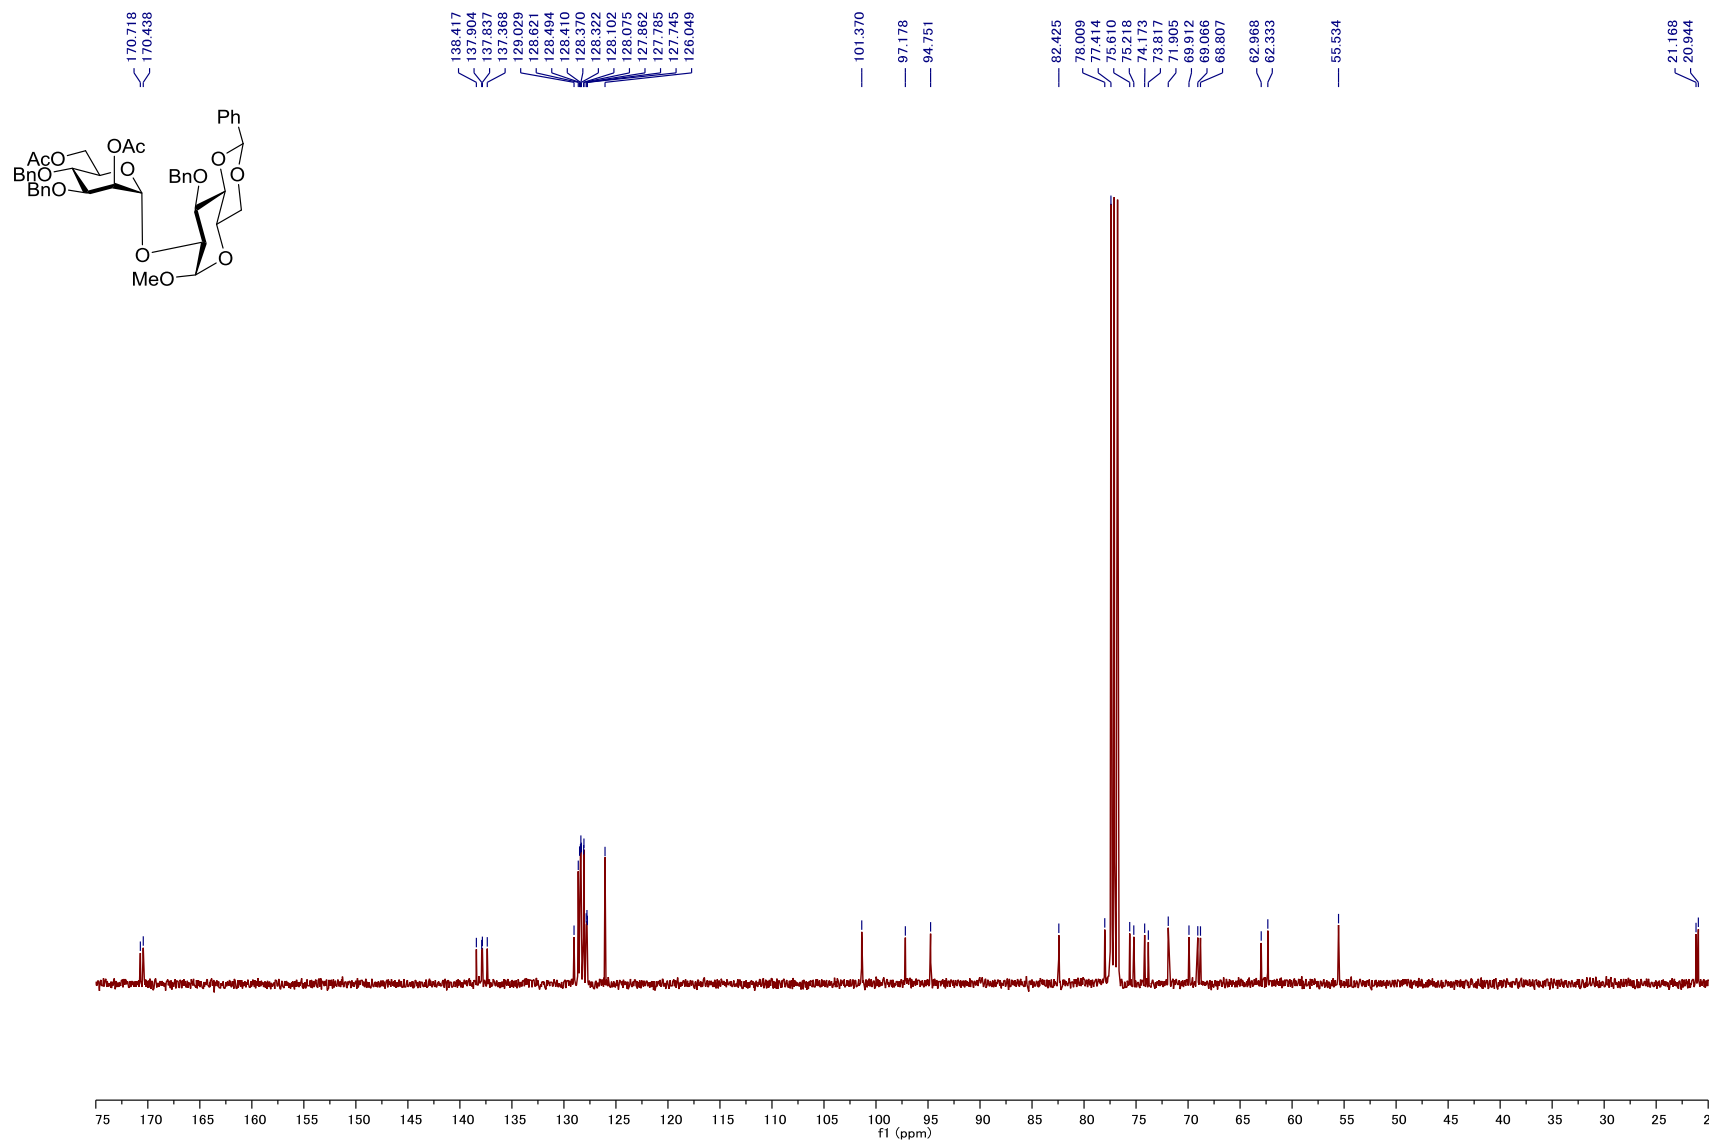



Methyl

2,3-*O*-isopropylidene-4-*O*-(3',4'-di-*O*-benzyl- $\alpha$ -D-mannopyranosyl)- $\alpha$ -L-rhamnopyranoside (S5b)  $^1\text{H}$  NMR (400 MHz,  $\text{CDCl}_3$ )

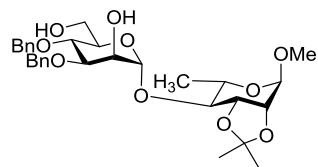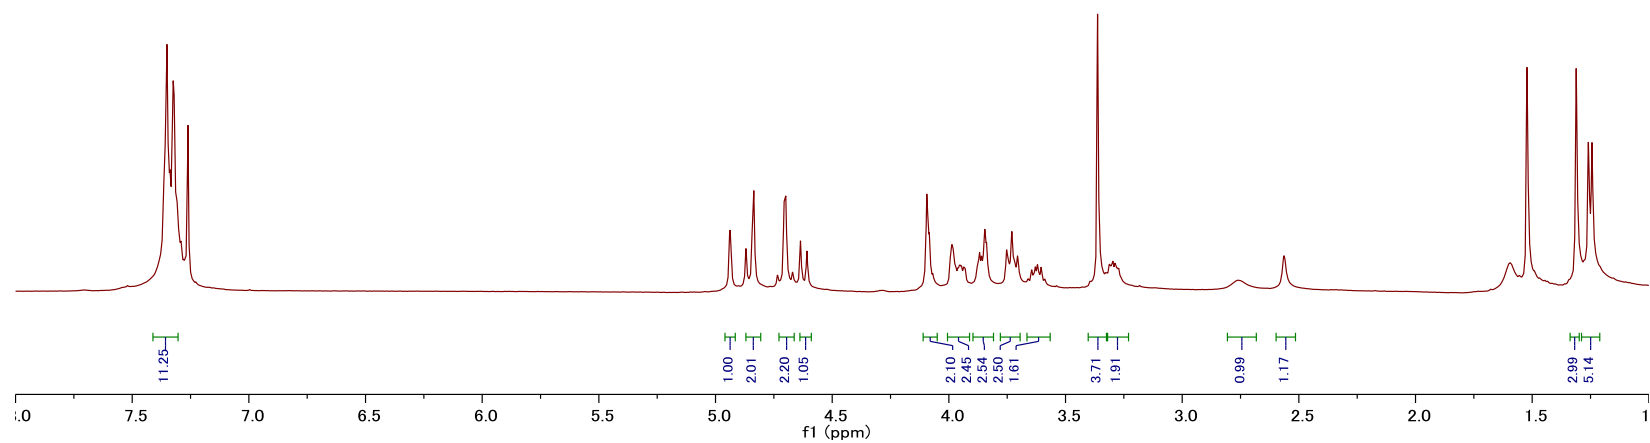

# Methyl

**2,3-*O*-isopropylidene-4-*O*-(3',4'-di-*O*-benzyl- $\alpha$ -D-mannopyranosyl)- $\alpha$ -L-rhamnopyranoside (S5b)**  $^{13}\text{C}$  NMR (100 MHz,  $\text{CDCl}_3$ )

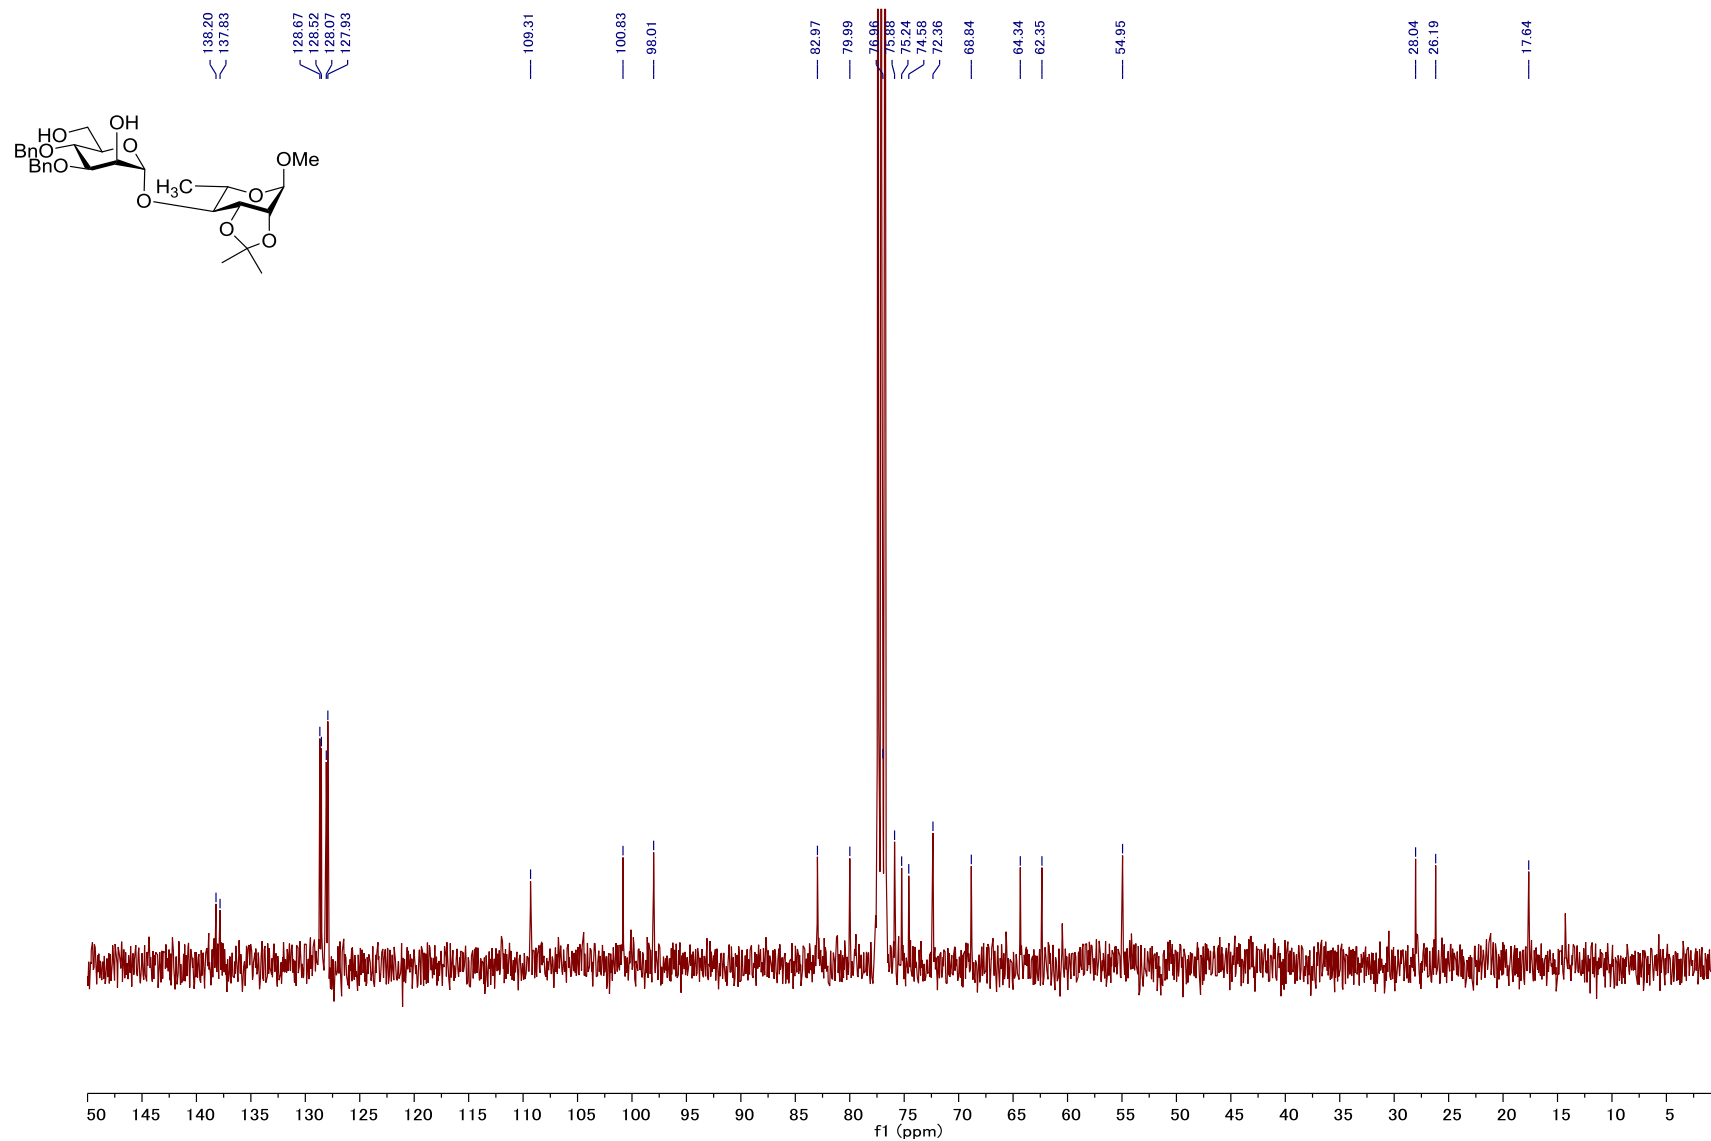

## Allyl

**2-*O*-(3',4'-di-*O*-benzyl- $\alpha$ -D-mannopyranosyl)-3-*O*-benzyl-4,6-*O*-benzylidene- $\alpha$ -D-mannopyranoside (S5c)**  $^1\text{H}$  NMR (400 MHz,  $\text{CDCl}_3$ )

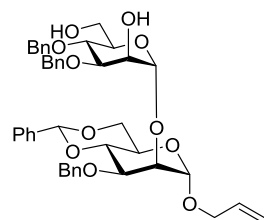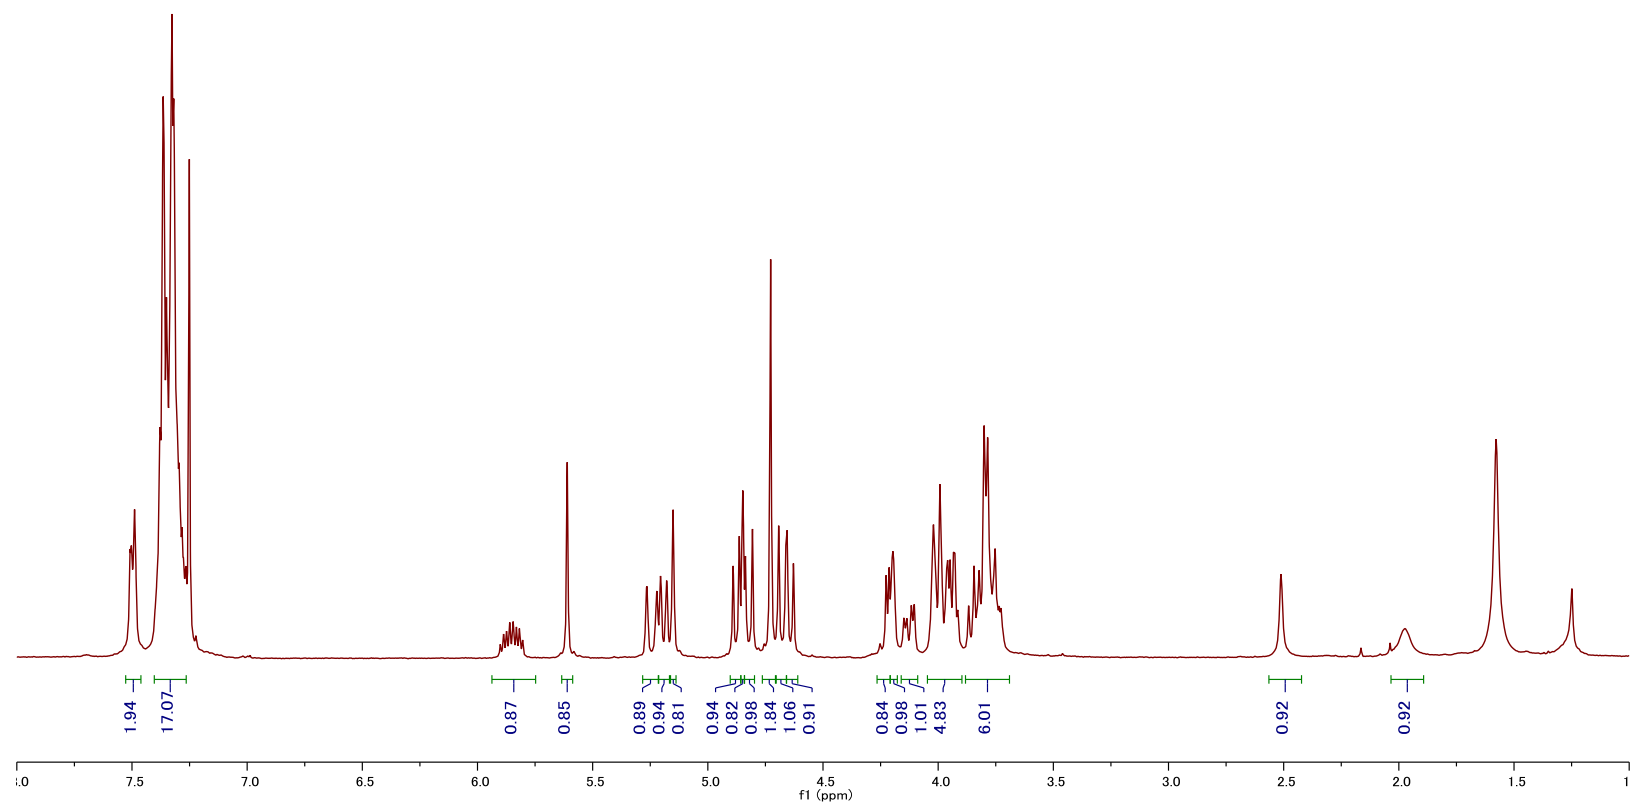

# Allyl

**2-*O*-(3',4'-di-*O*-benzyl- $\alpha$ -D-mannopyranosyl)-3-*O*-benzyl-4,6-*O*-benzylidene- $\alpha$ -D-mannopyranoside (S5c)**  $^{13}\text{C}$  NMR (100 MHz,  $\text{CDCl}_3$ )

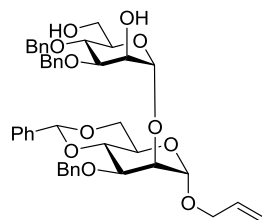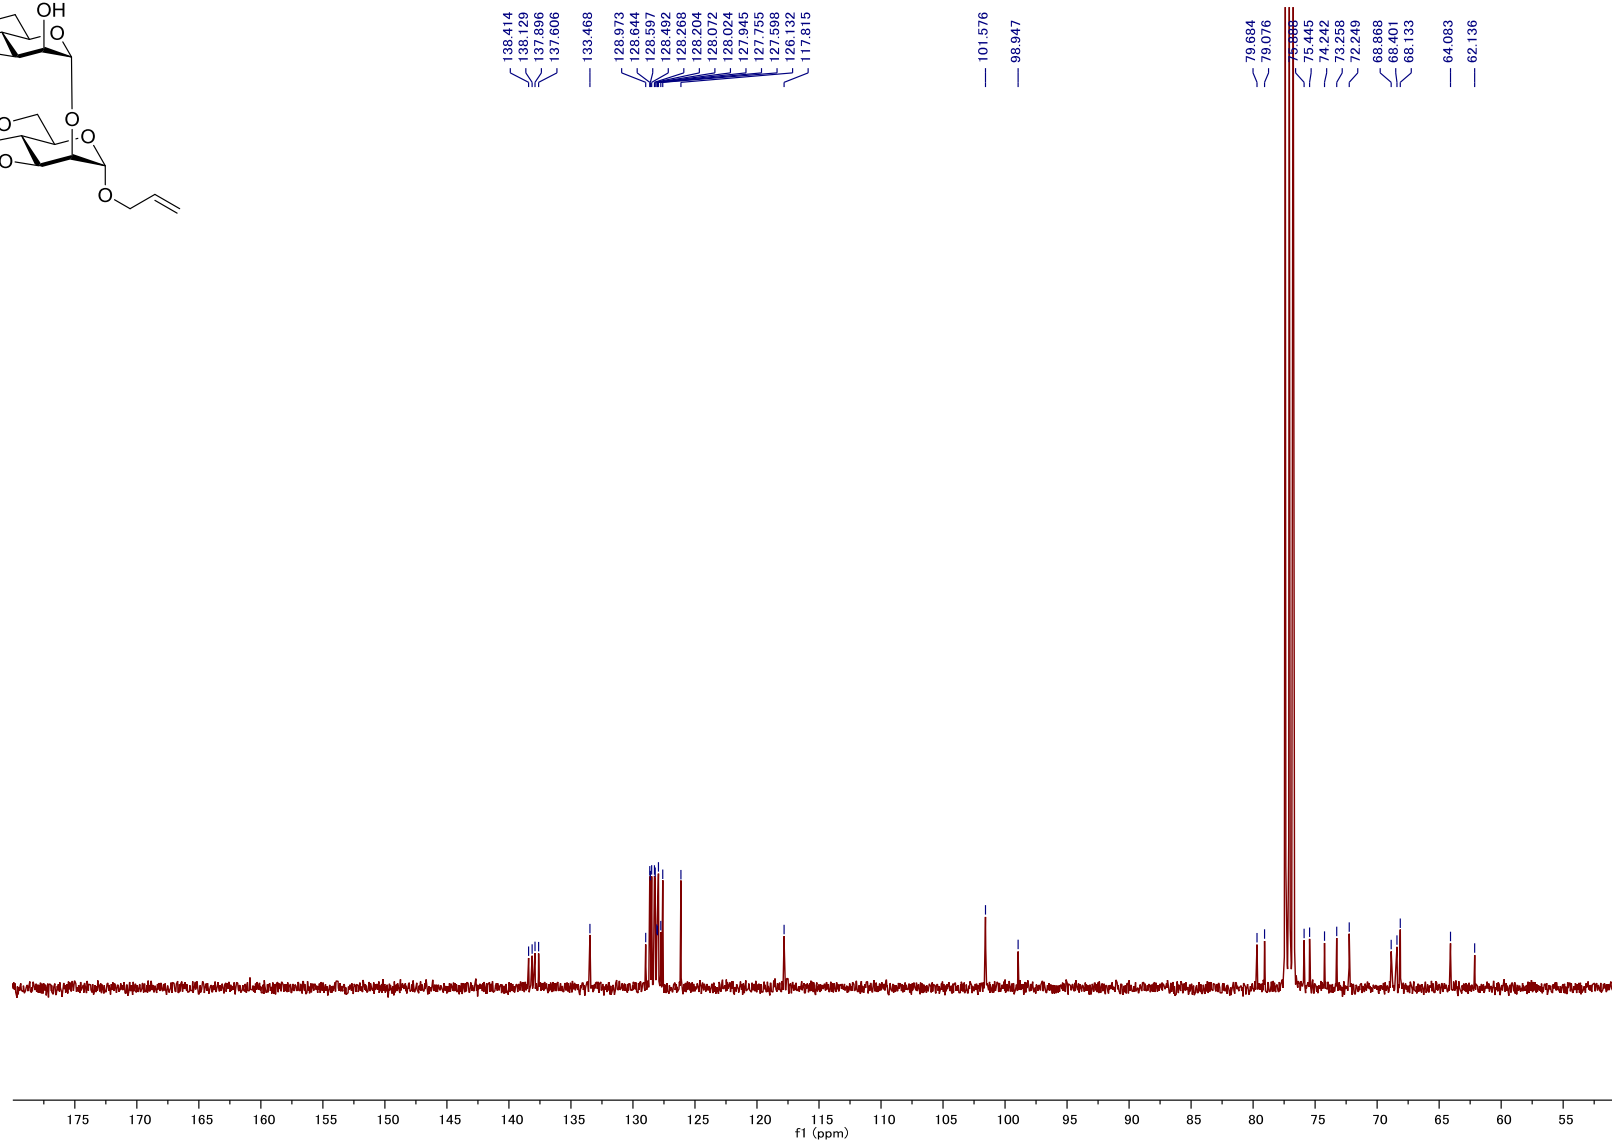

# Methyl

2-*O*-(3',4'-di-*O*-benzyl- $\alpha$ -D-mannopyranosyl)-3-*O*-benzyl-4,6-*O*-benzylidene- $\alpha$ -D-glucopyranoside (S5d)  $^1\text{H}$  NMR (400 MHz,  $\text{CDCl}_3$ )

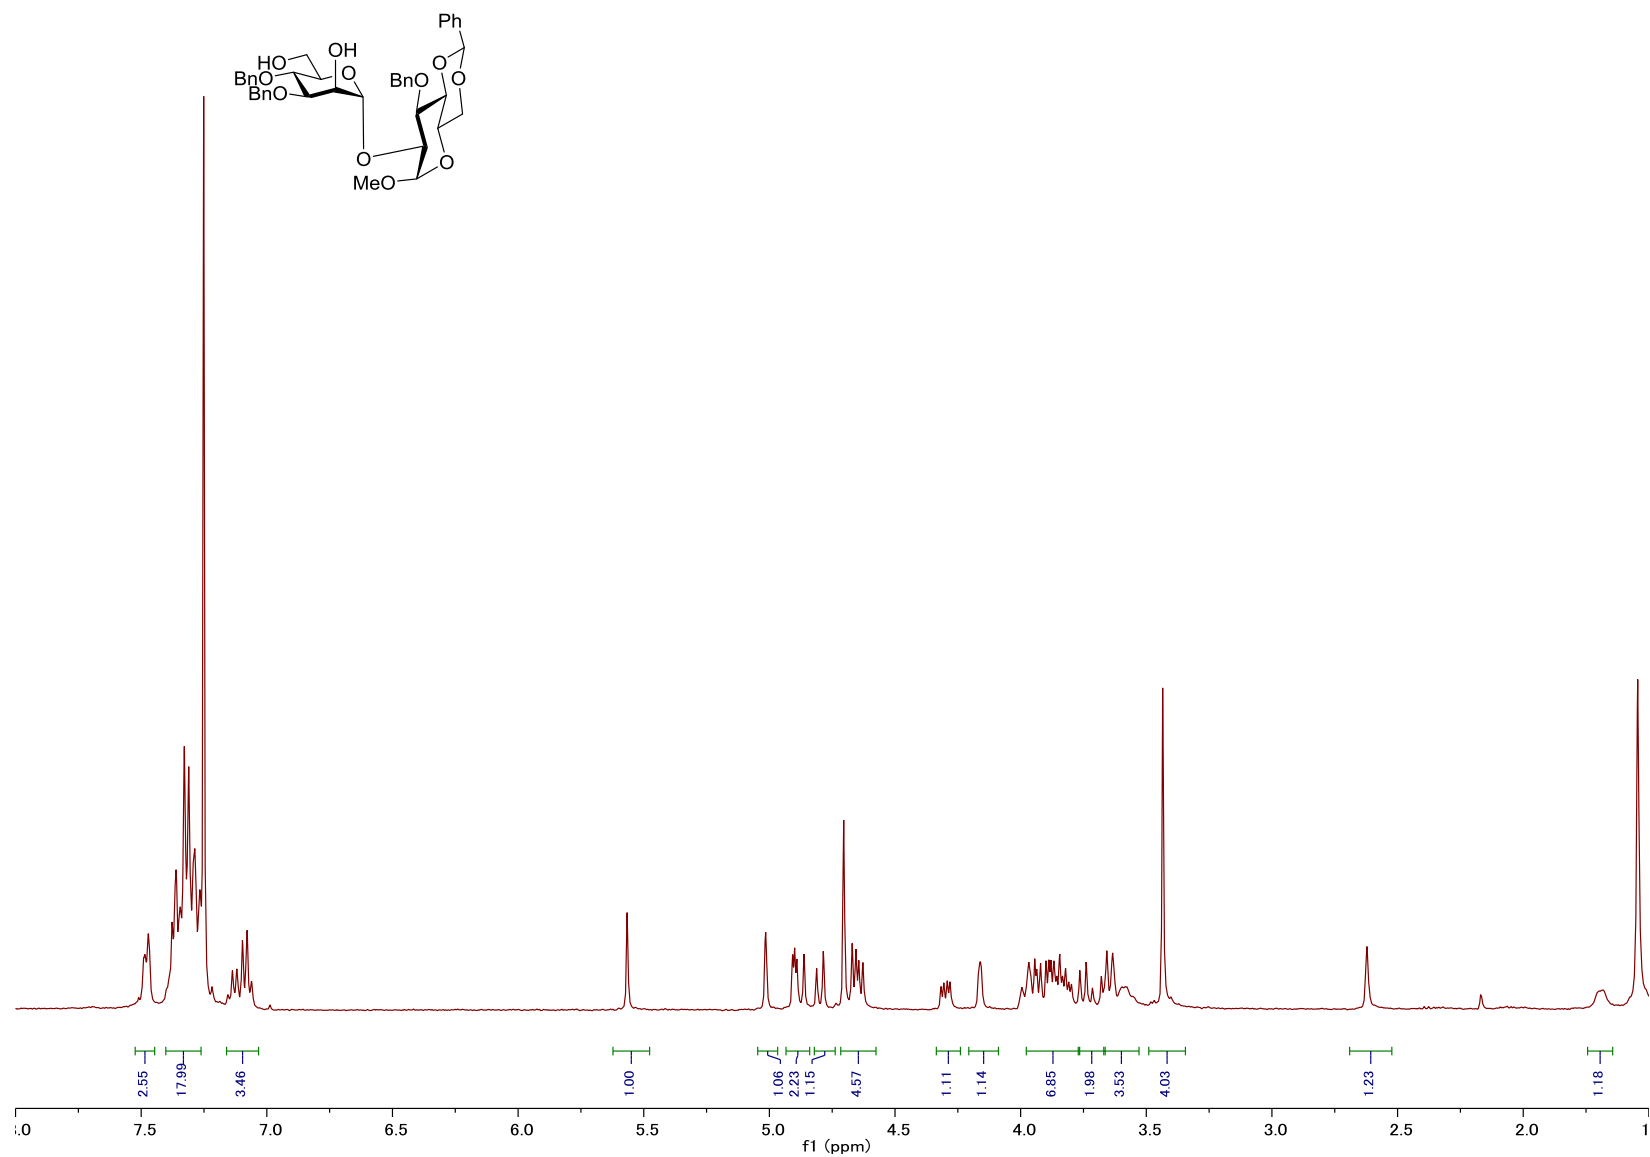

# Methyl

**2-*O*-(3',4'-di-*O*-benzyl- $\alpha$ -D-mannopyranosyl)-3-*O*-benzyl-4,6-*O*-benzylidene- $\alpha$ -D-glucopyranoside (S5d)**  $^{13}\text{C}$  NMR (100 MHz,  $\text{CDCl}_3$ )

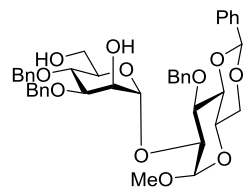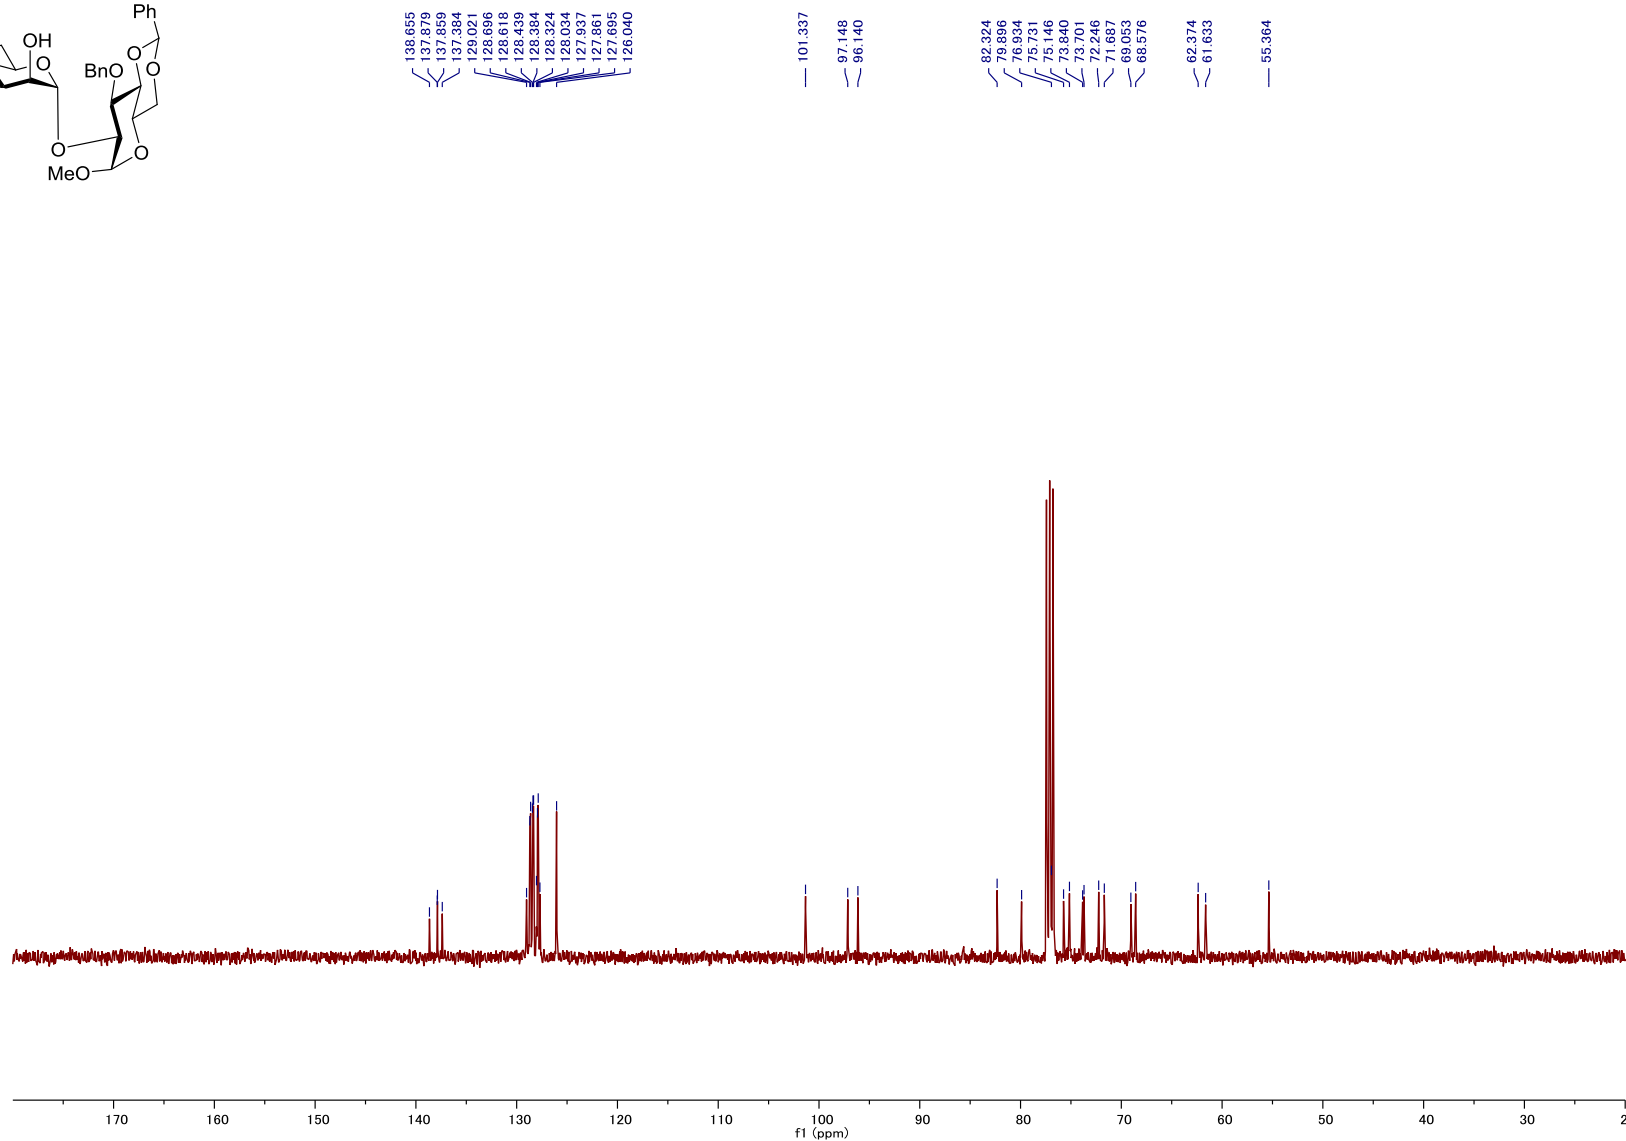

Methyl

2,3,6-tri-*O*-benzyl-4-*O*-(3',4'-di-*O*-benzyl- $\alpha$ -D-mannopyranosyl)- $\alpha$ -D-glucopyranoside (S5e)  $^1\text{H}$  NMR (400 MHz,  $\text{CDCl}_3$ )

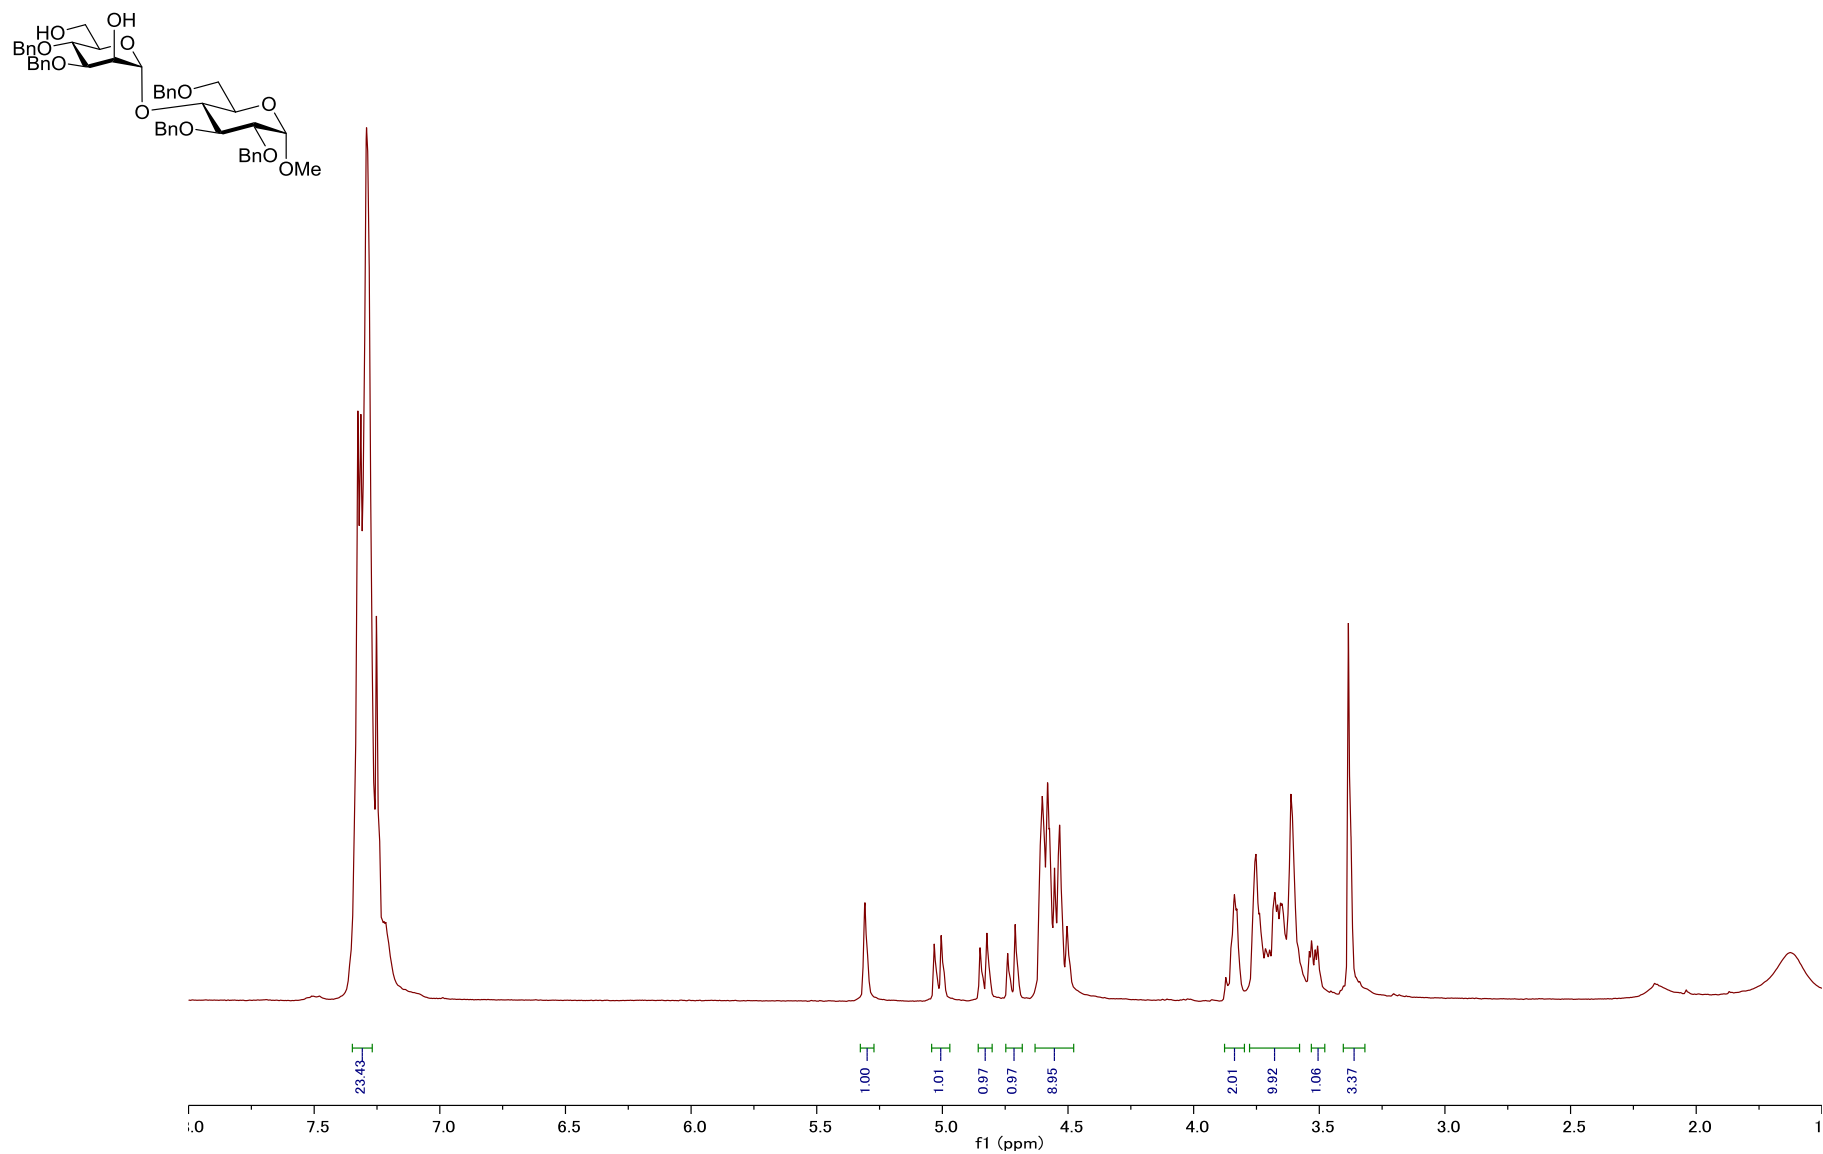

Methyl

2,3,6-tri-*O*-benzyl-4-*O*-(3',4'-di-*O*-benzyl- $\alpha$ -D-mannopyranosyl)- $\alpha$ -D-glucopyranoside (S5e)  $^{13}\text{C}$  NMR (100 MHz,  $\text{CDCl}_3$ )

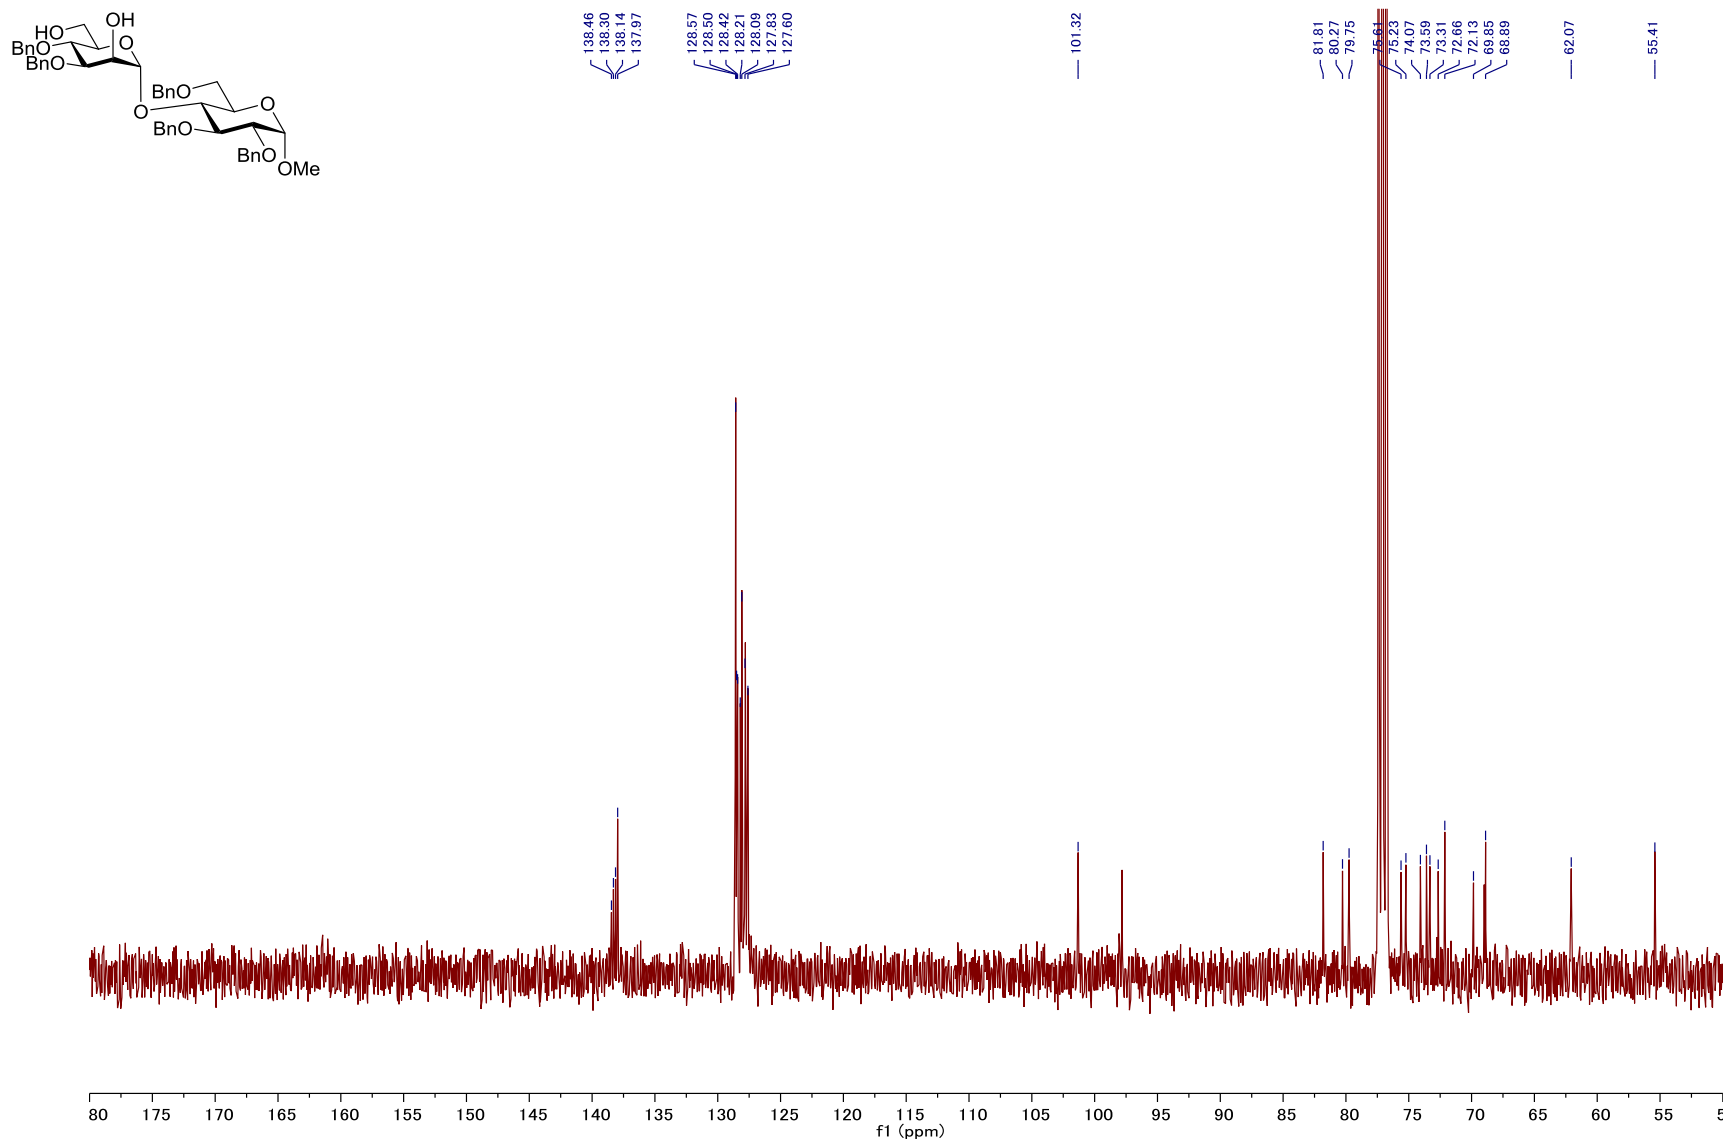



# Methyl

**2,3-*O*-isopropylidene-4-*O*-(3',4'-di-*O*-benzyl- $\alpha$ -D-mannopyranurono-2',6'-lacton-1'-yl)- $\alpha$ -L-rhamnopyranoside (7b $\alpha$ )**  $^1\text{H}$  NMR (400 MHz,

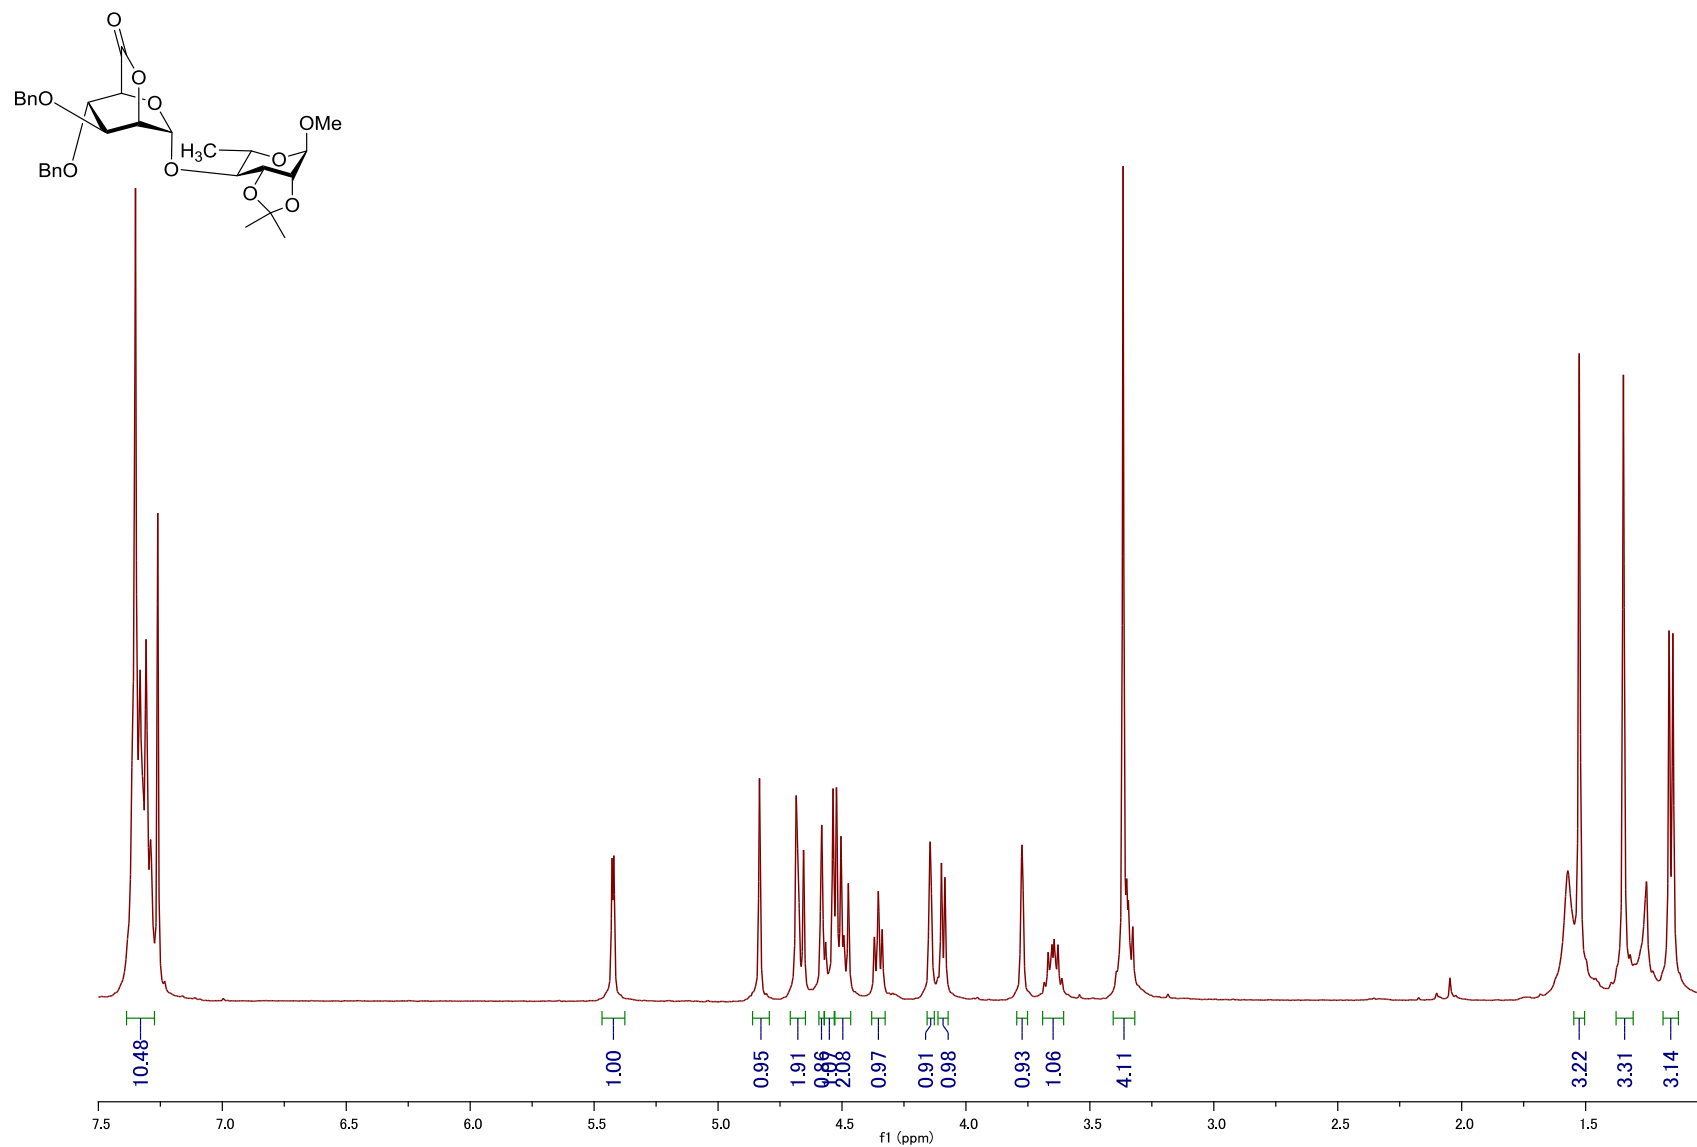

# Methyl

**2,3-*O*-isopropylidene-4-*O*-(3',4'-di-*O*-benzyl- $\alpha$ -D-mannopyranurono-2',6'-lacton-1'-yl)- $\alpha$ -L-rhamnopyranoside (7b $\alpha$ )**  $^{13}\text{C}$  NMR (100 MHz,

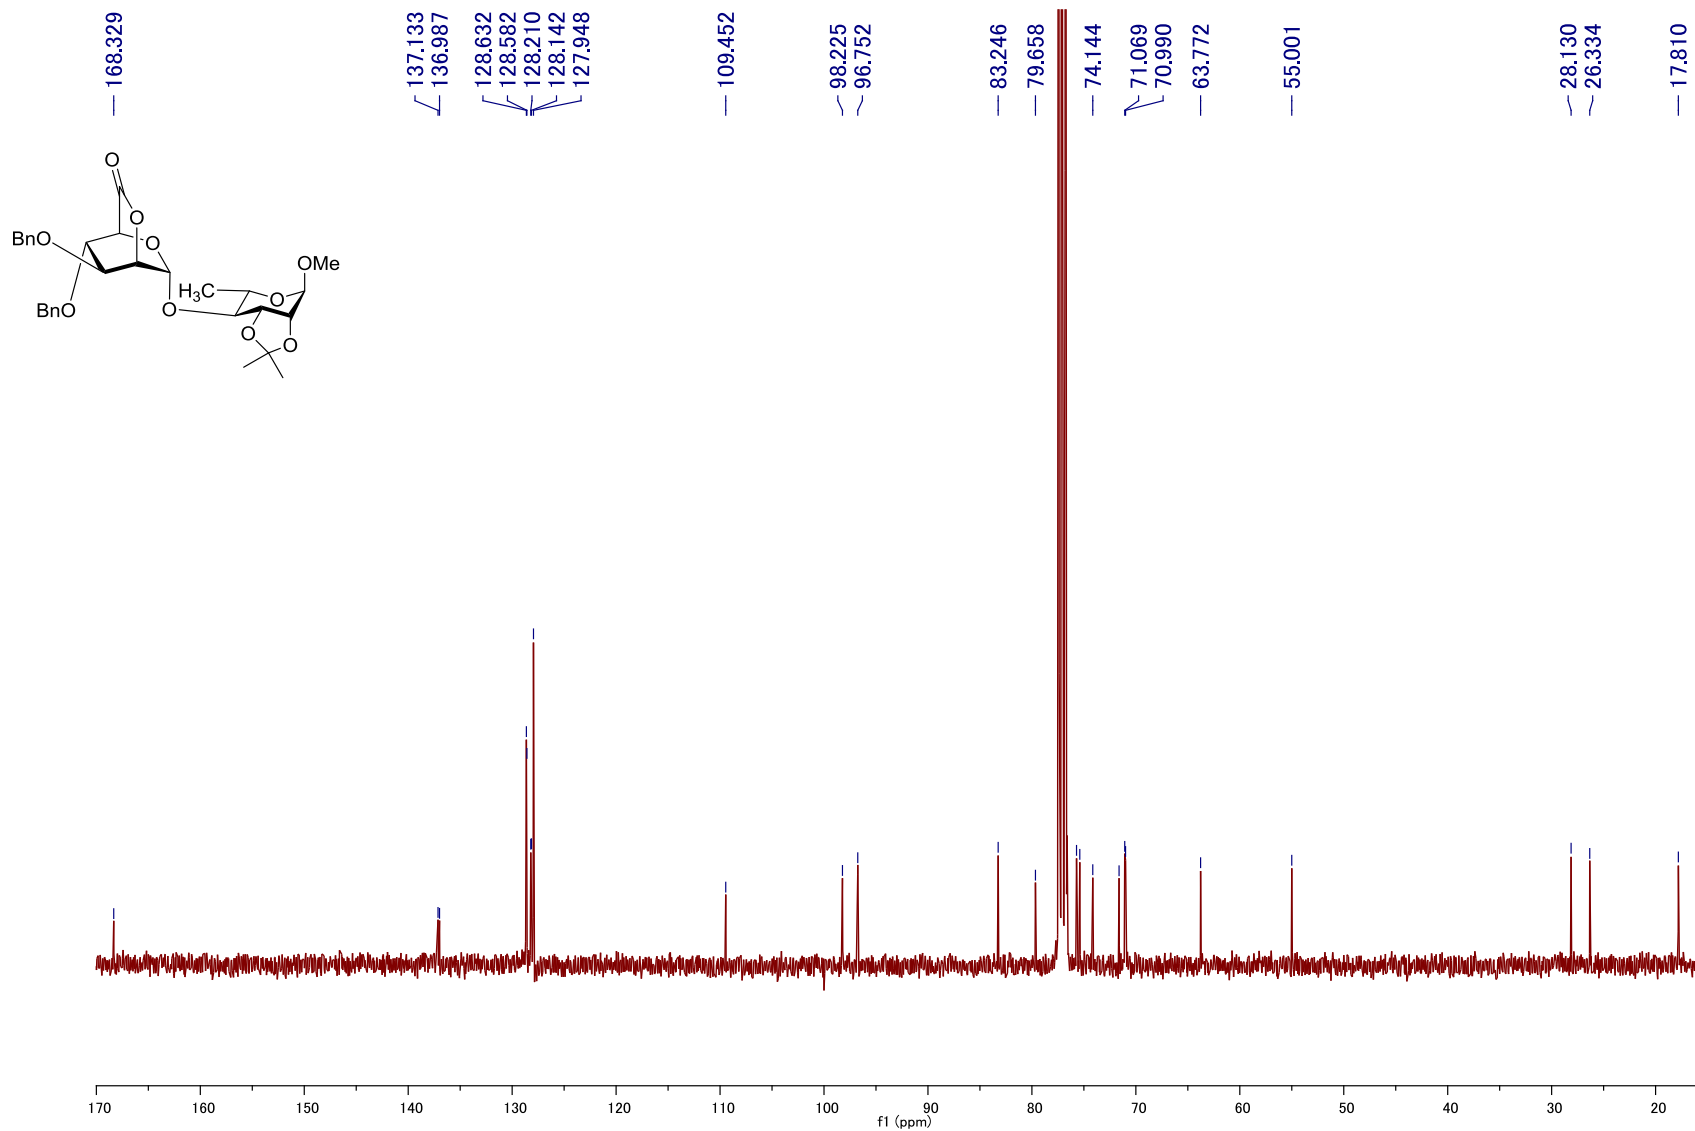

# Allyl

**2-*O*-(3',4'-di-*O*-benzyl- $\alpha$ -D-mannopyranurono-2',6'-lacton-1'-yl)-3-*O*-benzyl-4,6-*O*-benzylidene- $\alpha$ -D-mannopyranoside (7c $\alpha$ )**  $^1\text{H}$  NMR (400 MHz,  $\text{CDCl}_3$ )

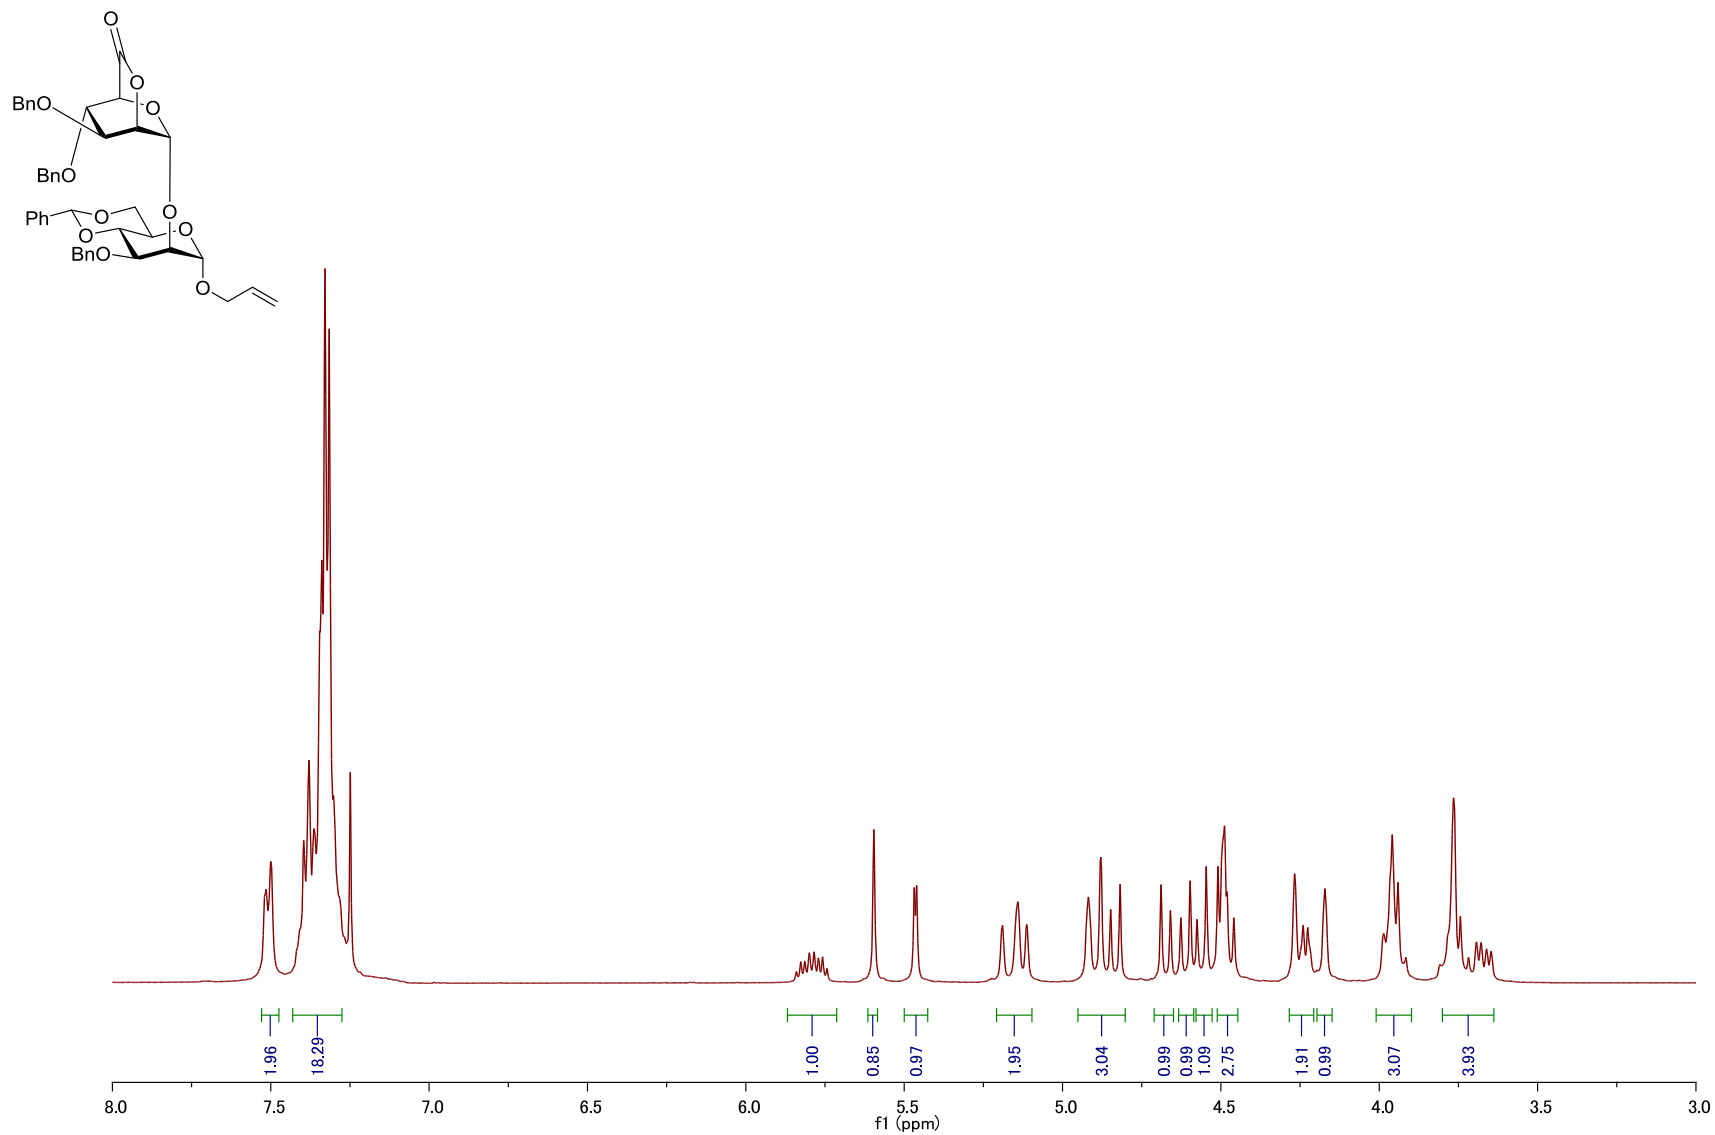

Allyl

2-*O*-(3',4'-di-*O*-benzyl- $\alpha$ -D-mannopyranurono-2',6'-lacton-1'-yl)-3-*O*-benzyl-4,6-*O*-benzylidene- $\alpha$ -D-mannopyranoside (7c $\alpha$ )  $^{13}\text{C}$  NMR (100 MHz,  $\text{CDCl}_3$ )

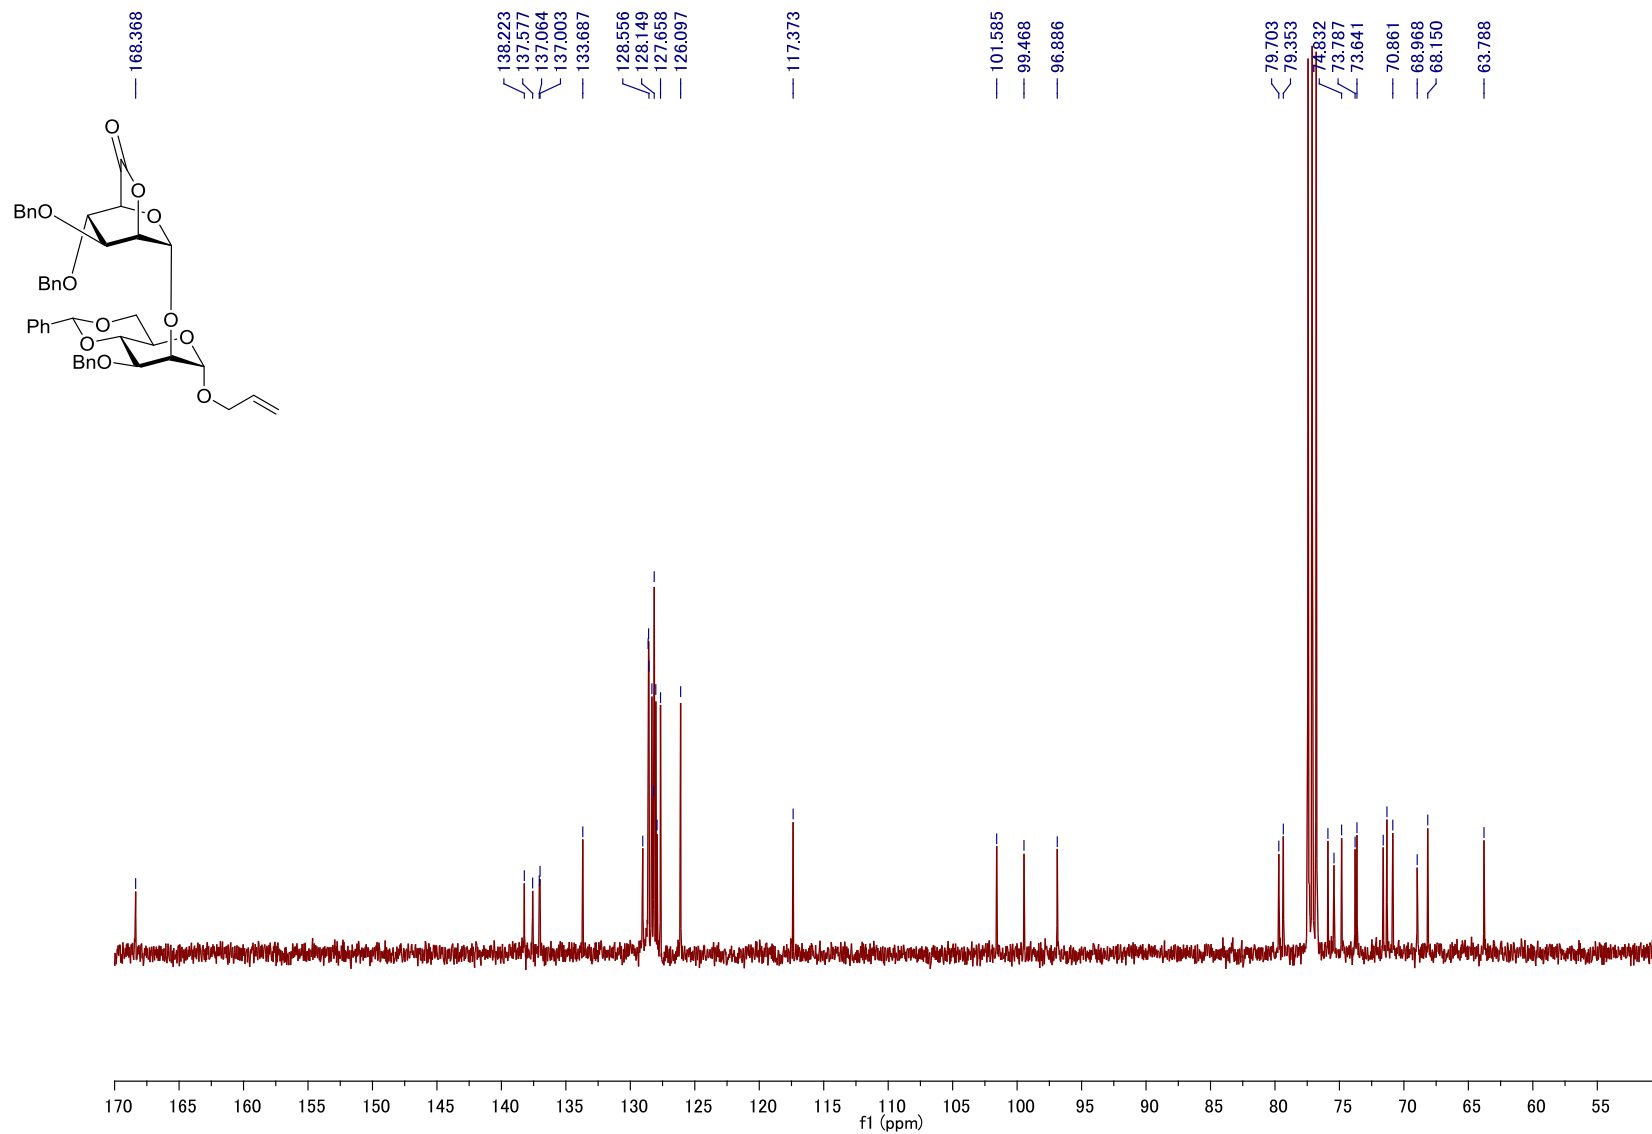

## Methyl

**2-*O*-(3',4'-di-*O*-benzyl- $\alpha$ -D-mannopyranurono-2',6'-lacton-1'-yl)-3-*O*-benzyl-4,6-*O*-benzylidene- $\alpha$ -D-glucopyranoside (7d $\alpha$ )**  $^1\text{H}$  NMR (400 MHz,  $\text{CDCl}_3$ )

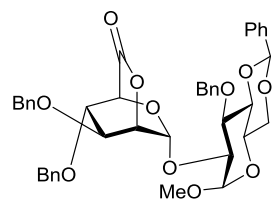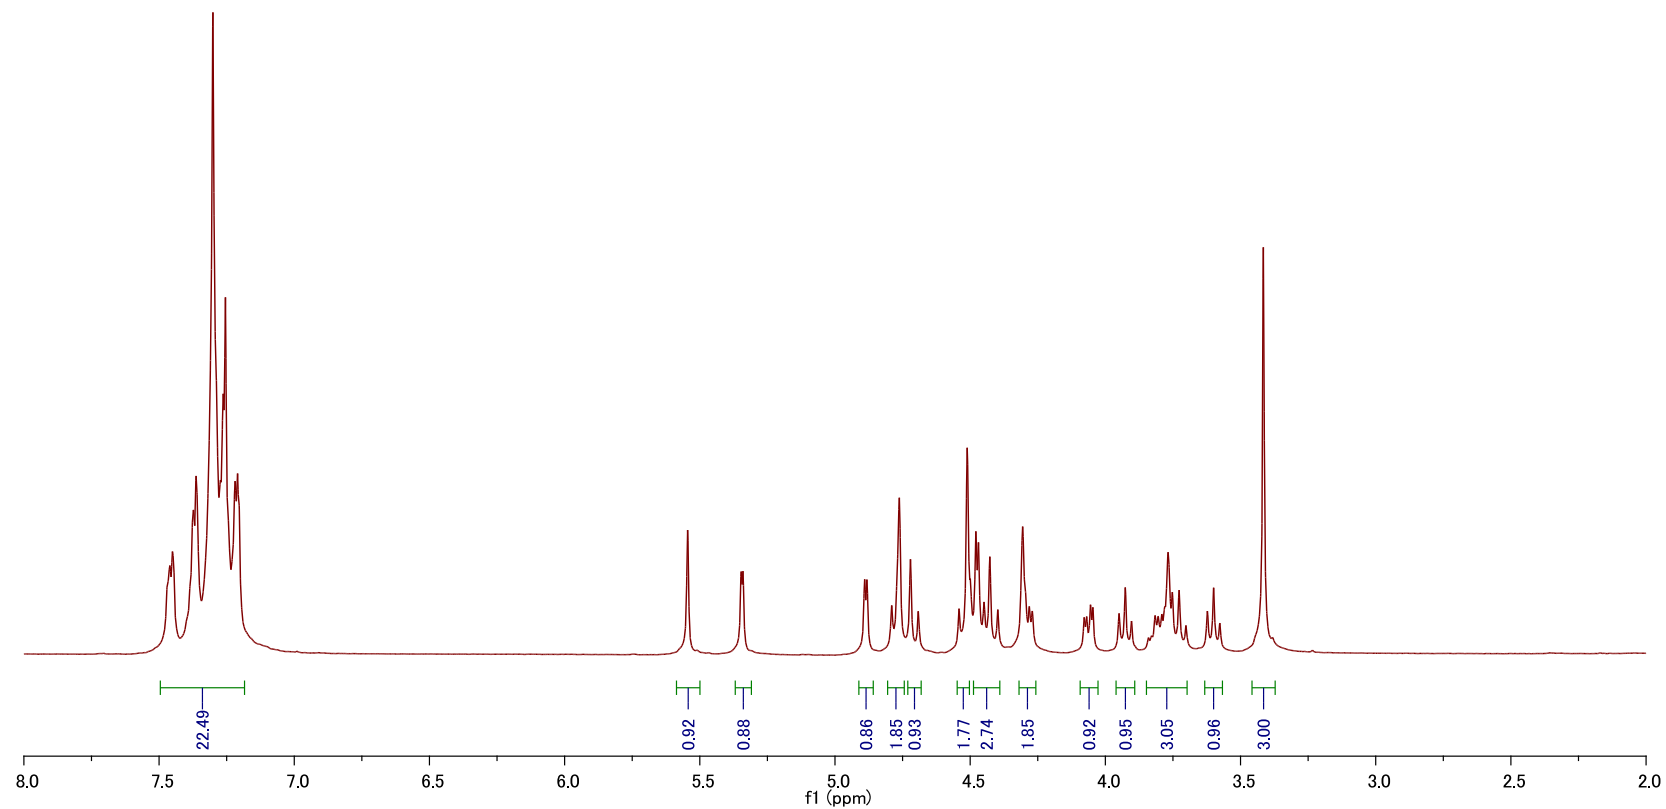

## Methyl

**2-*O*-(3',4'-di-*O*-benzyl- $\alpha$ -D-mannopyranurono-2',6'-lacton-1'-yl)-3-*O*-benzyl-4,6-*O*-benzylidene- $\alpha$ -D-glucopyranoside (7d $\alpha$ )**  $^{13}\text{C}$  NMR (100 MHz,  $\text{CDCl}_3$ )

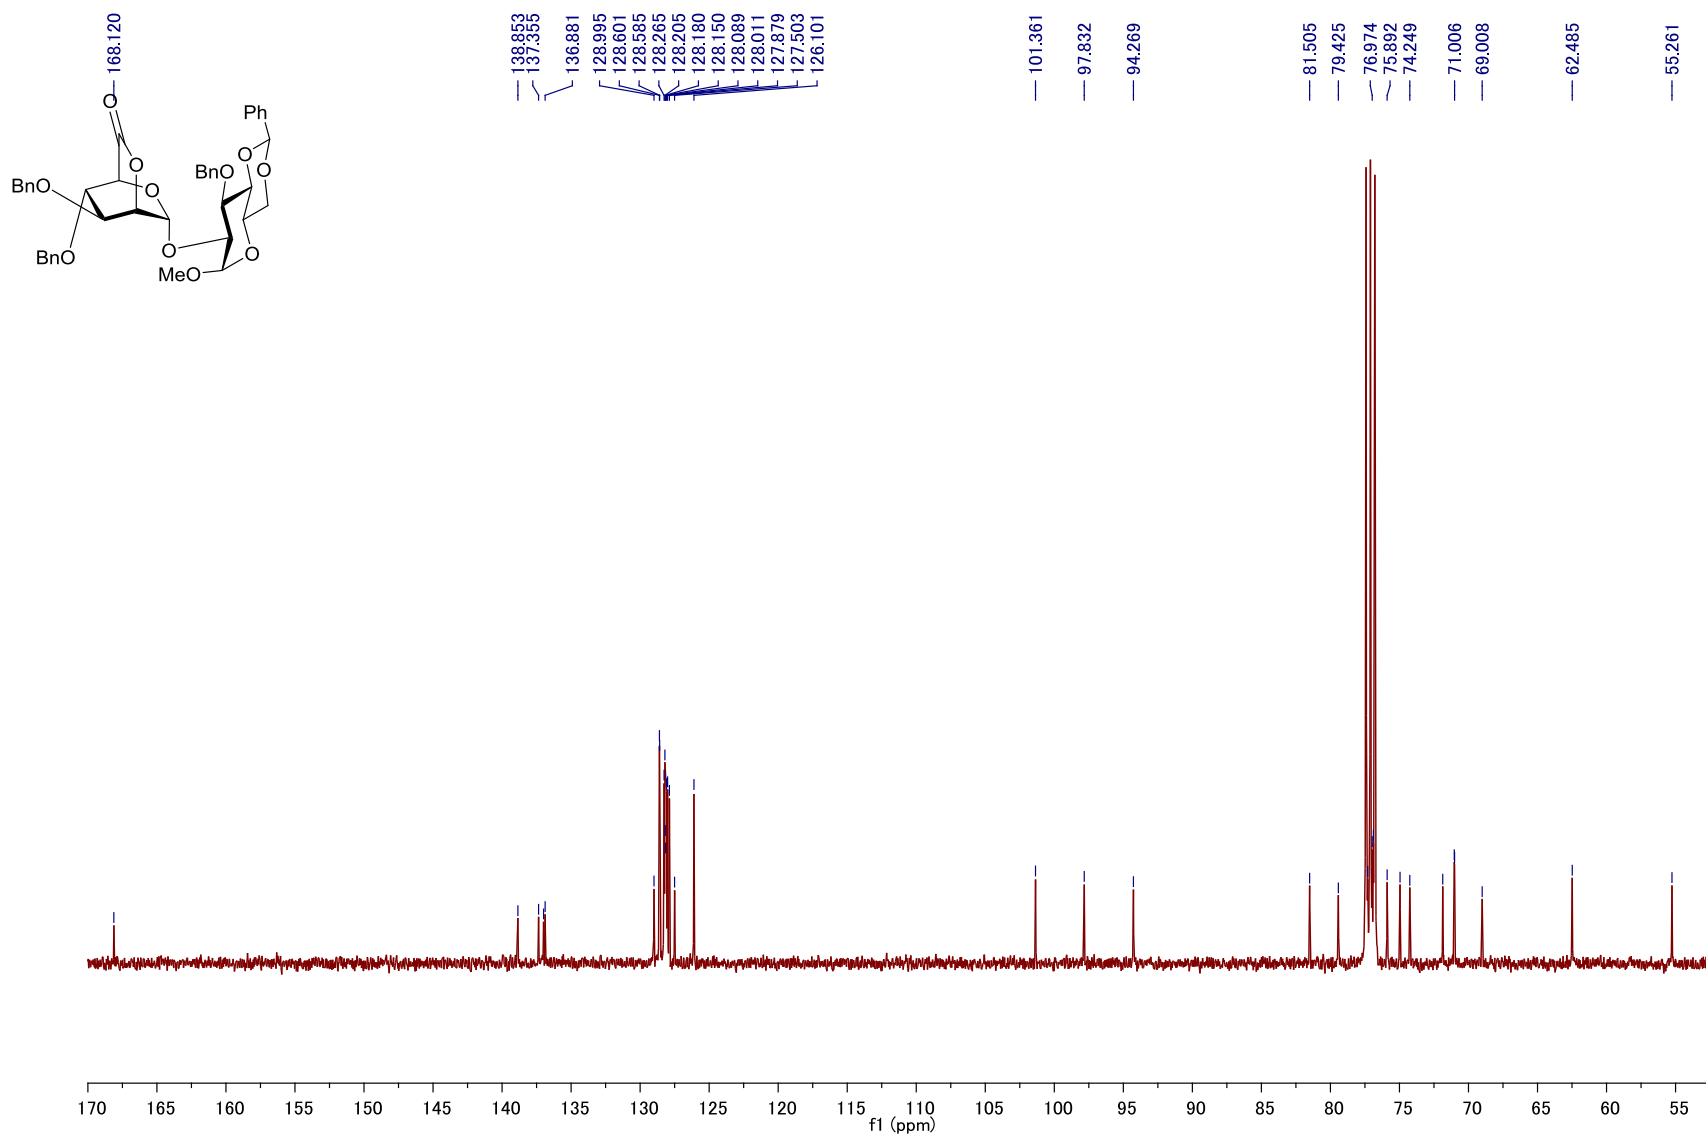

## Methyl

**2,3,6-tri-*O*-benzyl-4-*O*-(3',4'-di-*O*-benzyl- $\alpha$ -D-mannopyranurono-2',6'-lacton-1'-yl)- $\alpha$ -D-glucopyranoside (7c $\alpha$ )**  $^1\text{H}$  NMR (400 MHz,  $\text{CDCl}_3$ )

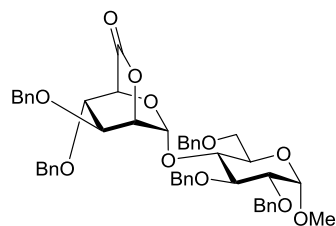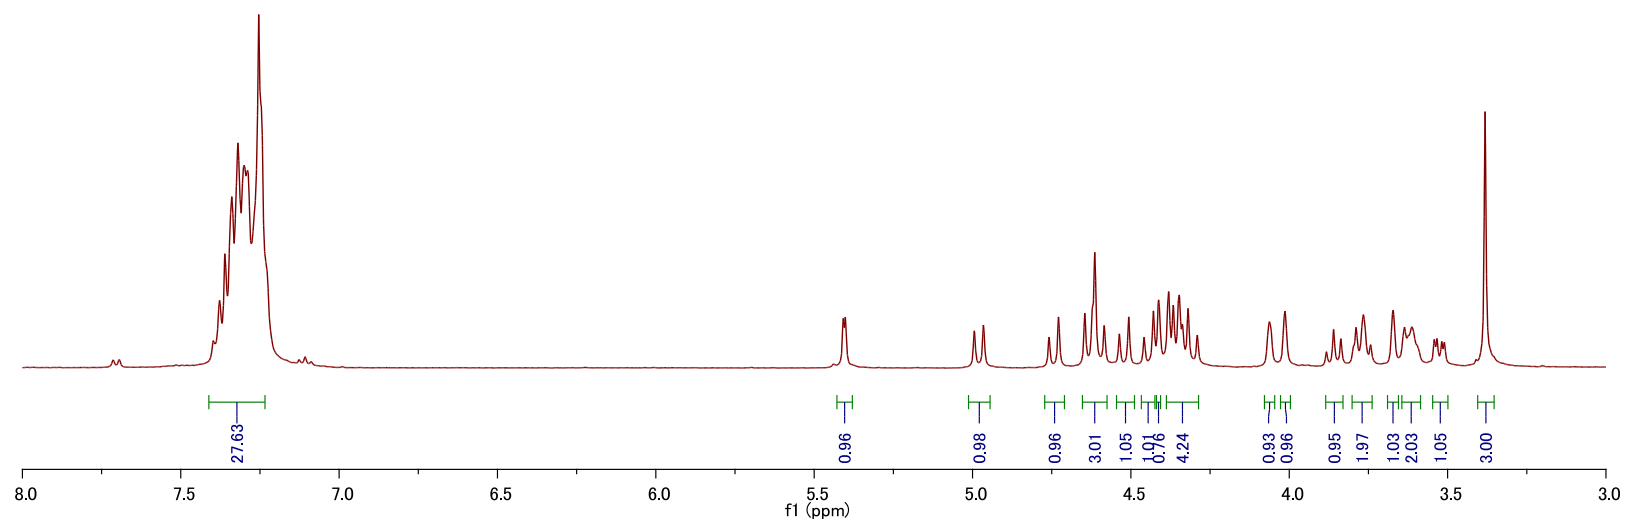

# Methyl

2,3,6-tri-*O*-benzyl-4-*O*-(3',4'-di-*O*-benzyl- $\alpha$ -D-mannopyranurono-2',6'-lacton-1'-yl)- $\alpha$ -D-glucopyranoside (**7e $\alpha$** )  $^{13}\text{C}$  NMR (100 MHz,  $\text{CDCl}_3$ )

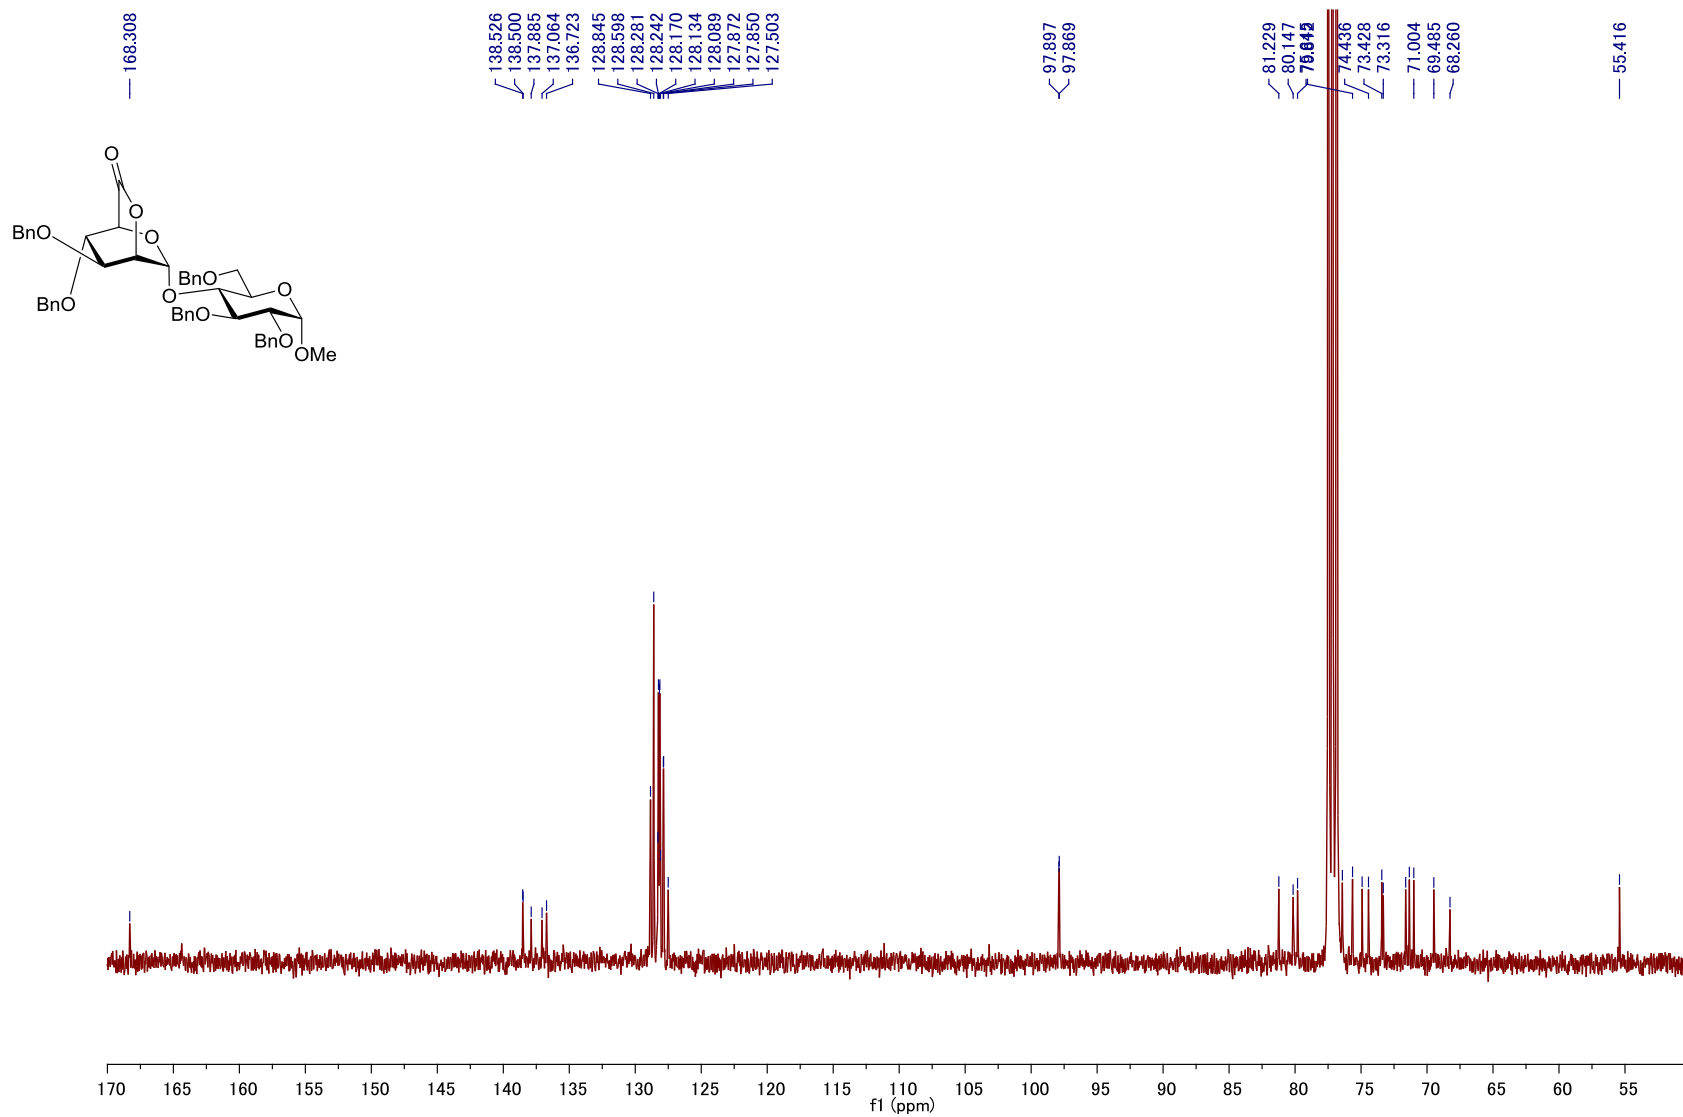



# Methyl

2,3,4-tri-*O*-benzyl-6-*O*-(3',4'-di-*O*-benzyl- $\beta$ -D-mannopyranoyl)- $\alpha$ -D-glucopyranoside (**8**)  $^1\text{H}$  NMR (400 MHz,  $\text{CDCl}_3$ )

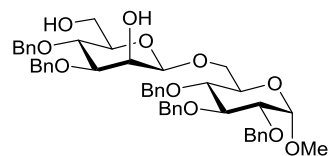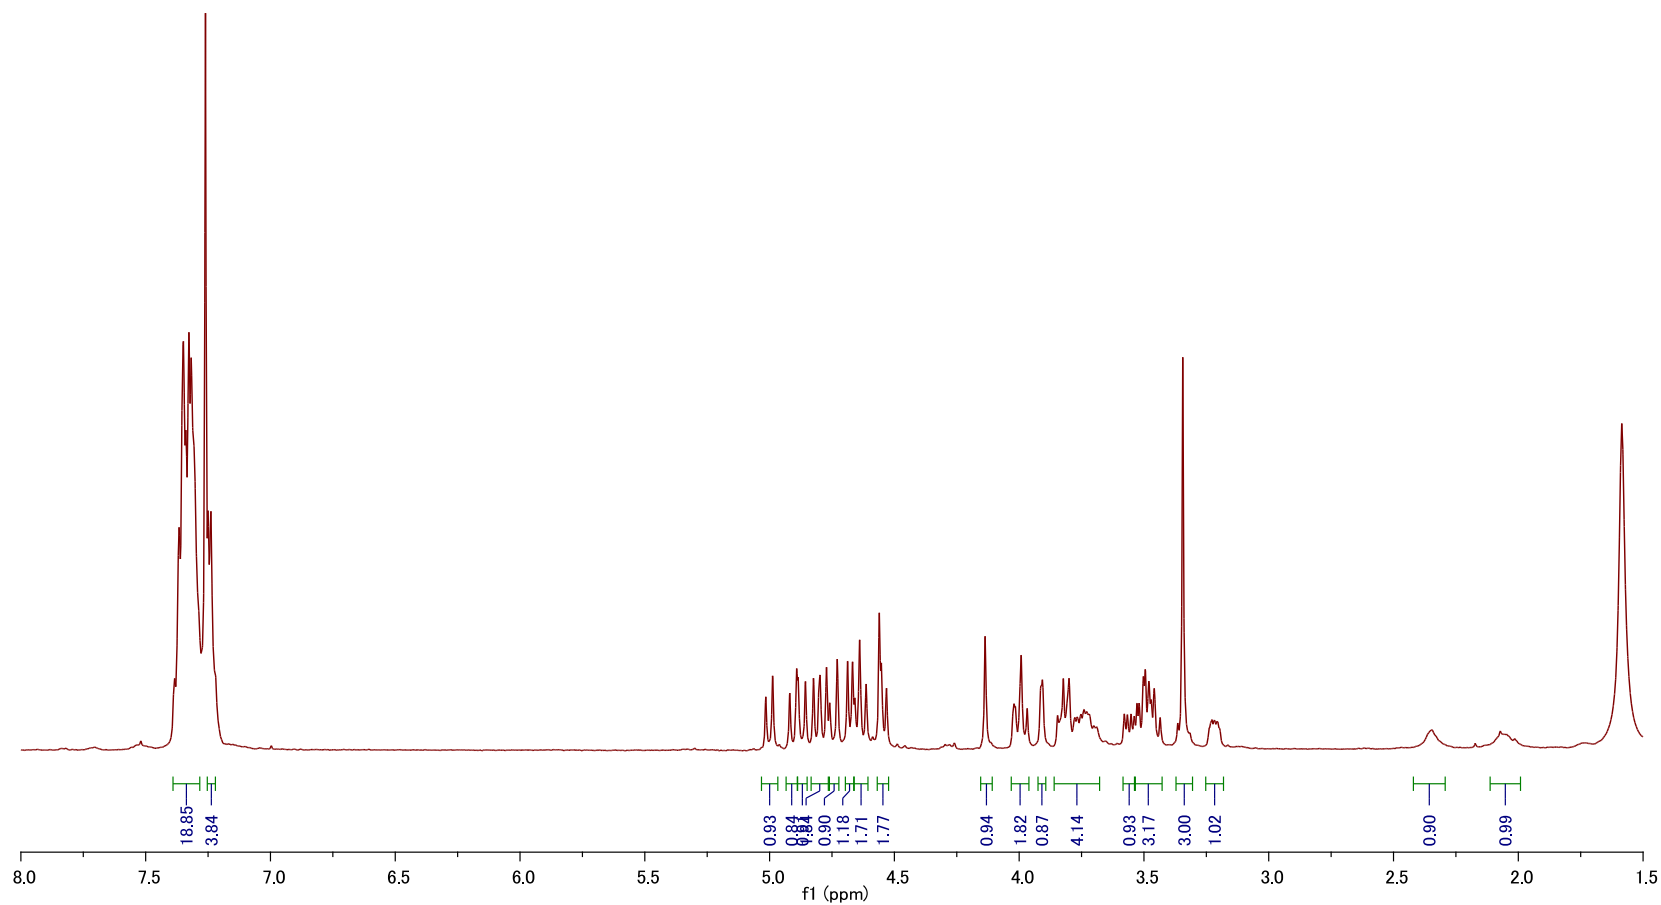

# Methyl

2,3,4-tri-*O*-benzyl-6-*O*-(3',4'-di-*O*-benzyl- $\beta$ -D-mannopyranoyl)- $\alpha$ -D-glucopyranoside (**8**)  $^{13}\text{C}$  NMR (100 MHz,  $\text{CDCl}_3$ )

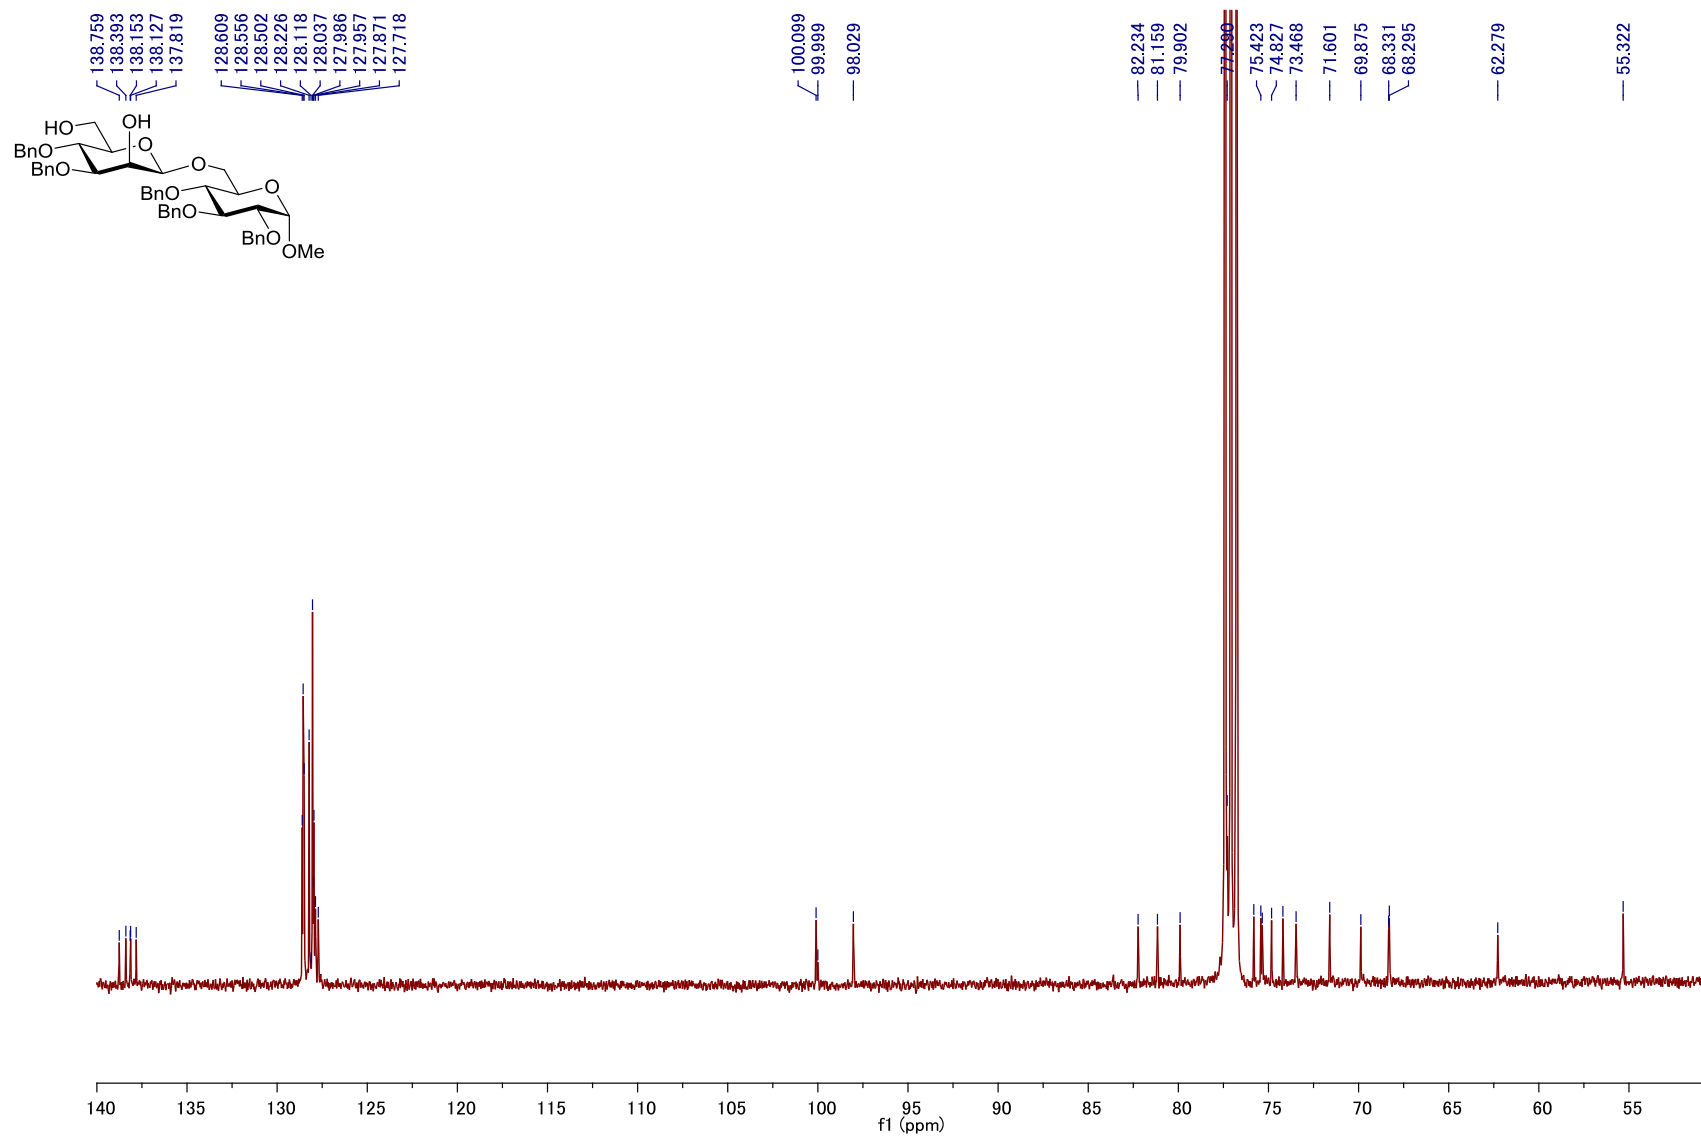

## Methyl

2,3,4-Tri-*O*-benzyl-6-*O*-(methyl (3',4'-di-*O*-benzyl- $\beta$ -D-mannopyranosyl) uronate)- $\alpha$ -D-glucopyranoside (**9**)  $^1\text{H}$  NMR (400 MHz,  $\text{CDCl}_3$ )

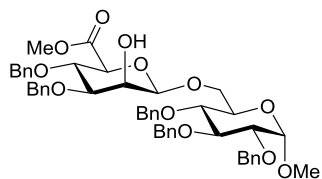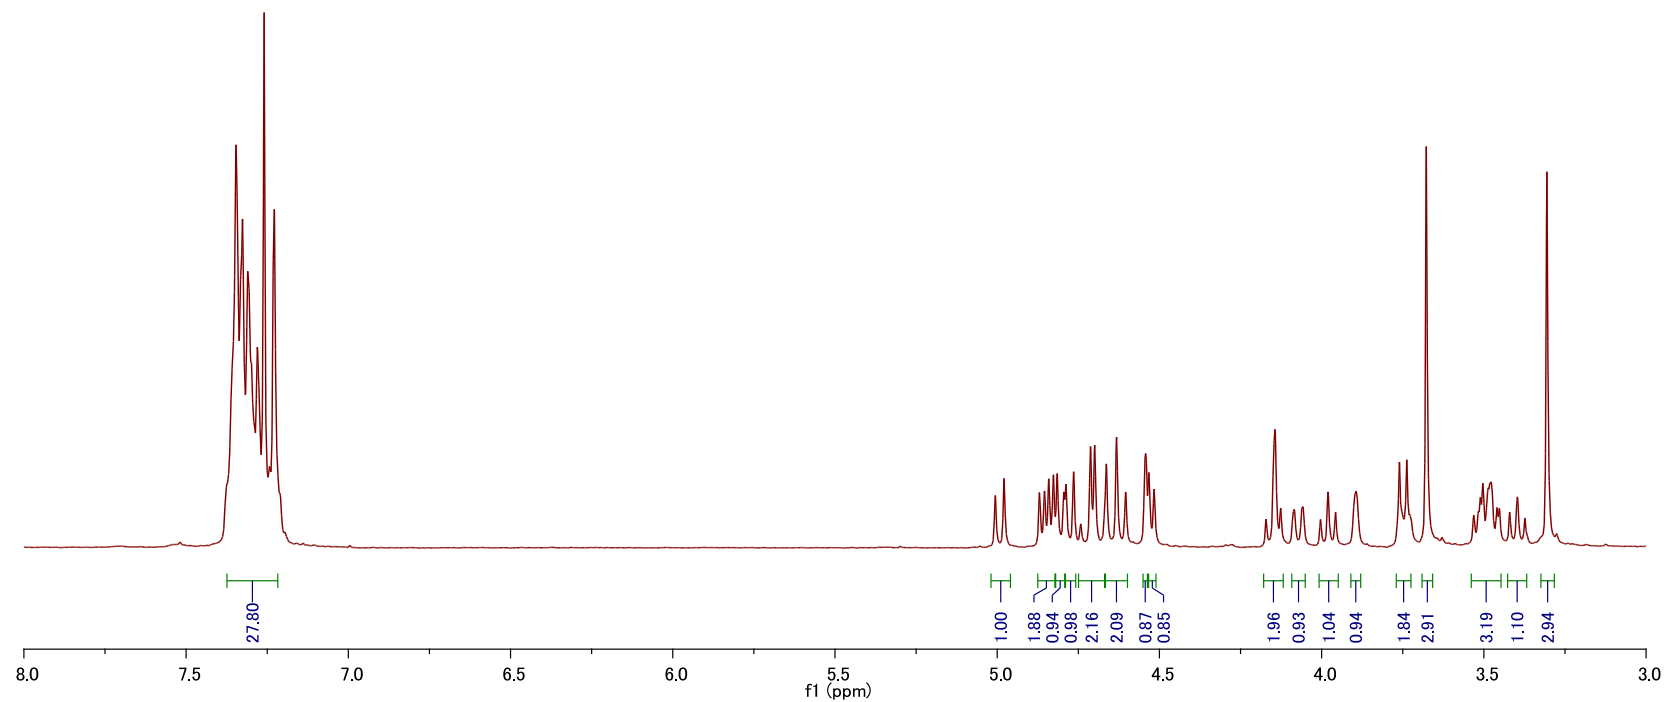

# Methyl

2,3,4-Tri-*O*-benzyl-6-*O*-(methyl (3',4'-di-*O*-benzyl- $\beta$ -D-mannopyranosyl) uronate)- $\alpha$ -D-glucopyranoside (**9**)  $^{13}\text{C}$  NMR (100 MHz,  $\text{CDCl}_3$ )

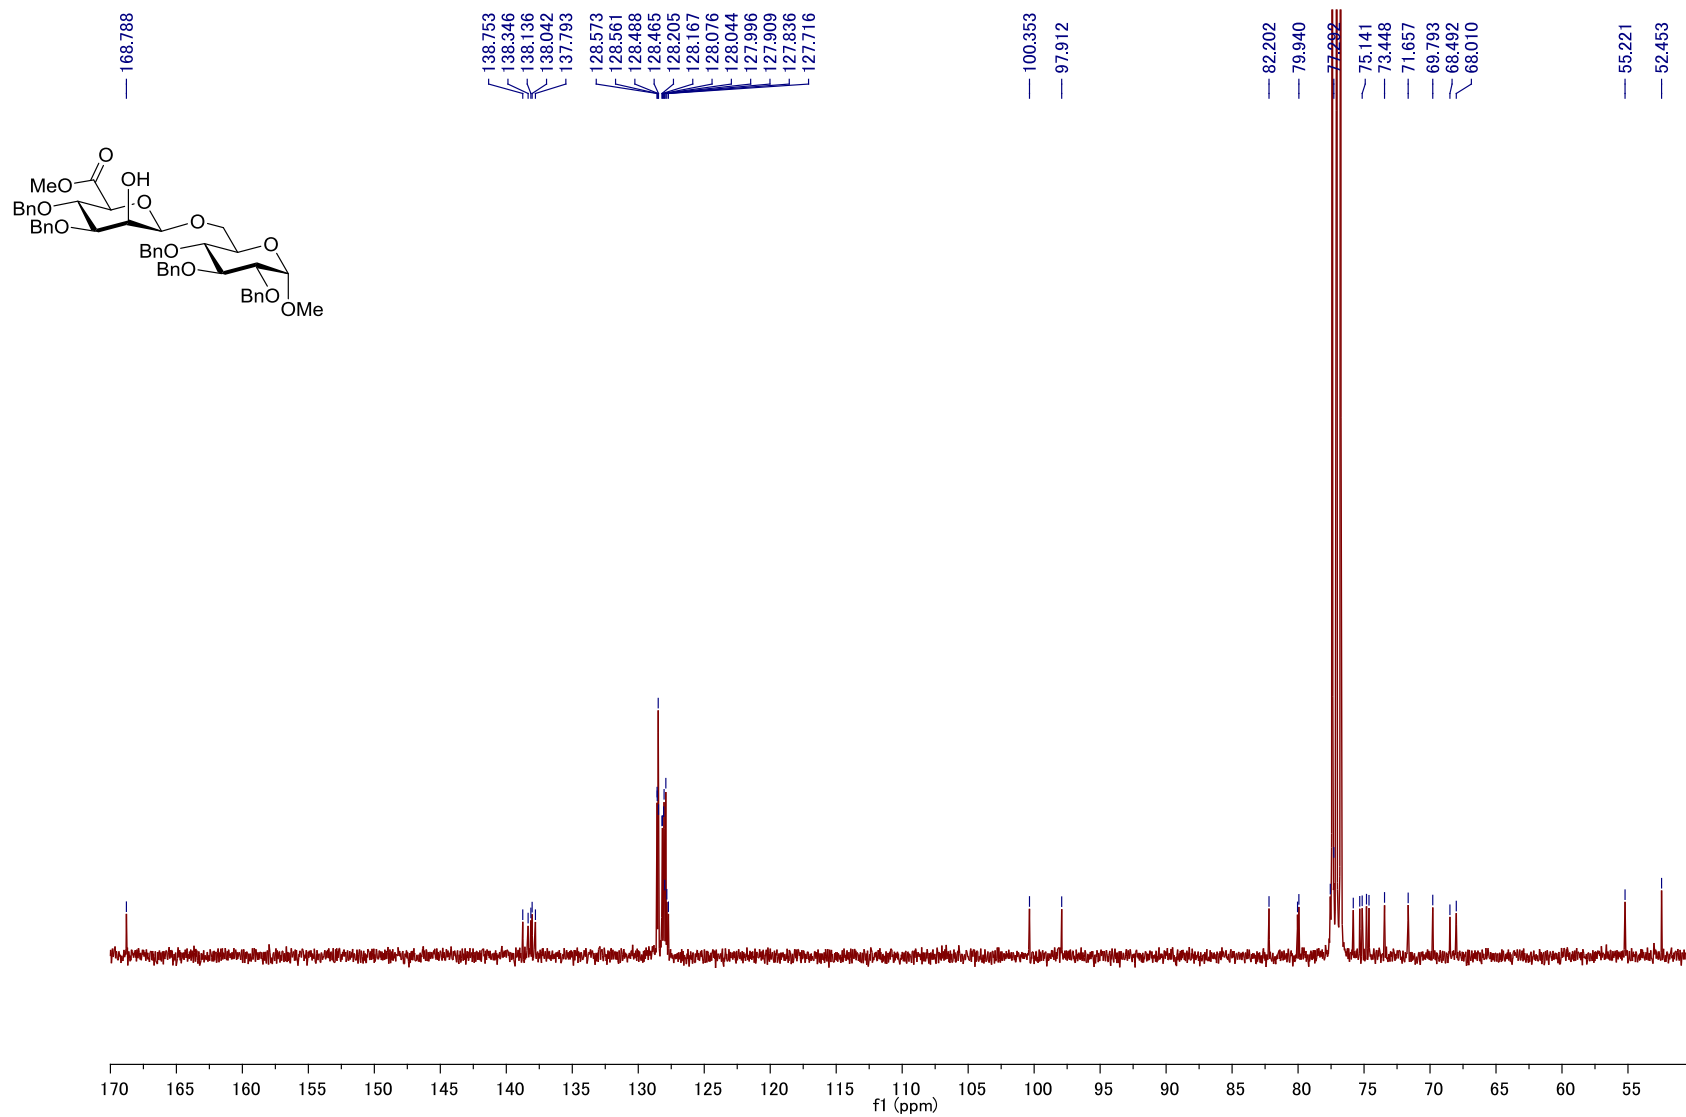

**3,4-Di-*O*-benzyl- $\alpha$ -D-mannopyranurono-2,6-lacton-1-yl diphenylphosphate (10 $\alpha$ )**  $^1\text{H}$  NMR (400 MHz,  $(\text{CD}_3)_2\text{CO}$ )

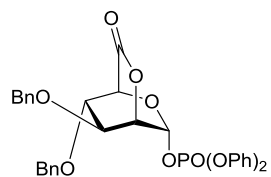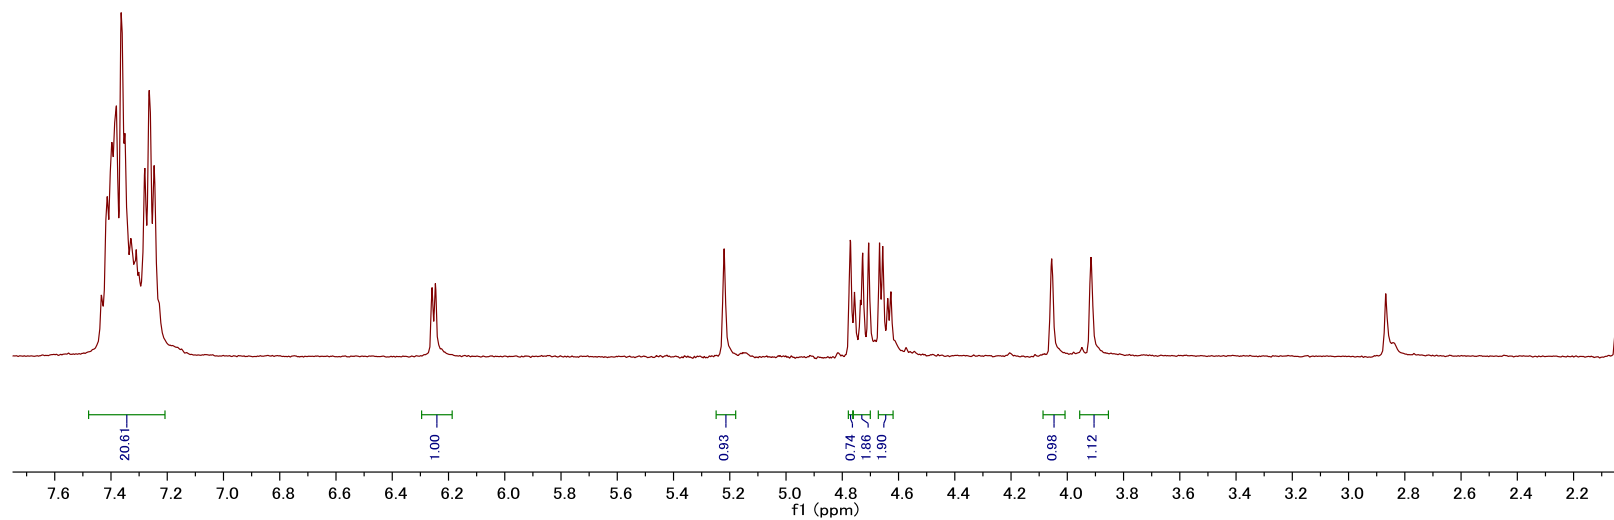

**3,4-Di-*O*-benzyl-D-mannopyranurono-2,6-lacton-1-yl diphenylphosphate (10 $\alpha\beta$ )**  $^1\text{H}$  NMR (400 MHz,  $(\text{CD}_3)_2\text{CO}$ )

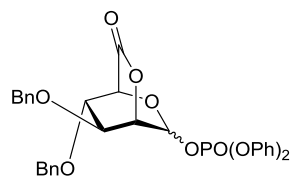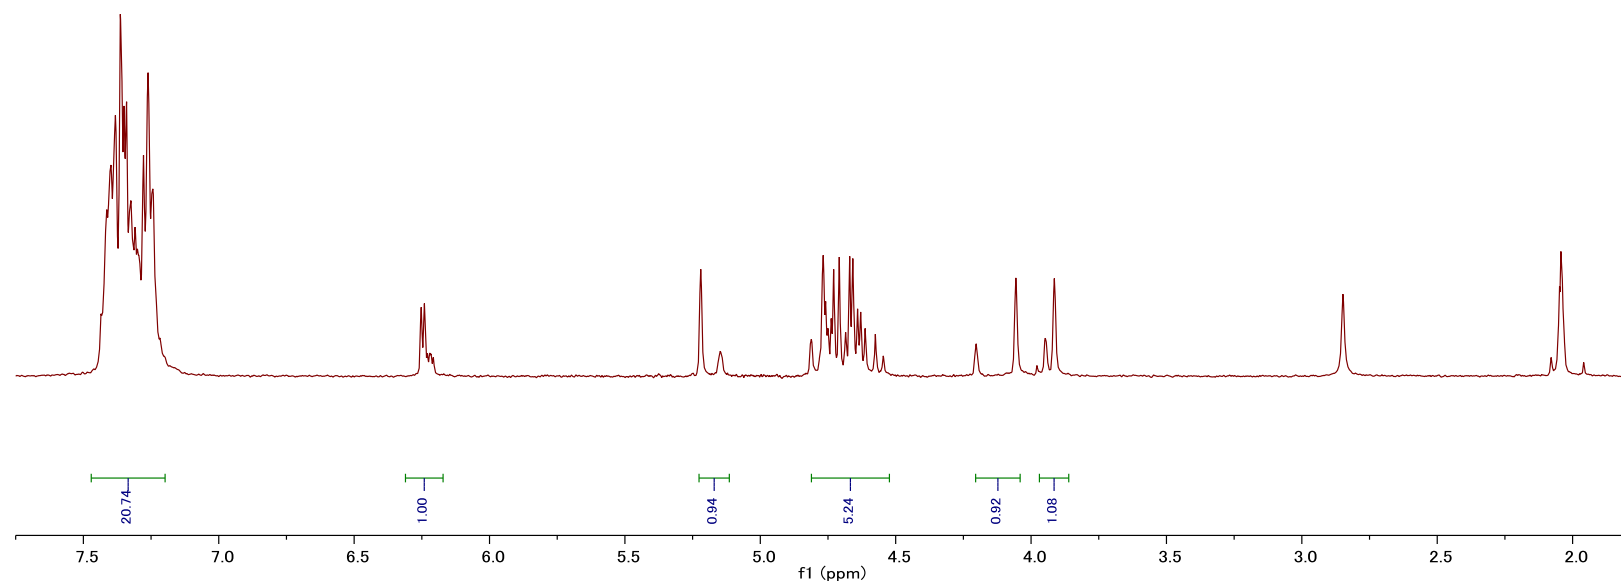

**3,4-Di-*O*-benzyl- $\alpha$ -D-mannopyranurono-2,6-lacton-1-yl diphenylphosphate (10 $\alpha$ )**  $^{13}\text{C}$  NMR (100 MHz,  $(\text{CD}_3)_2\text{CO}$ )

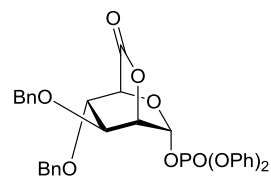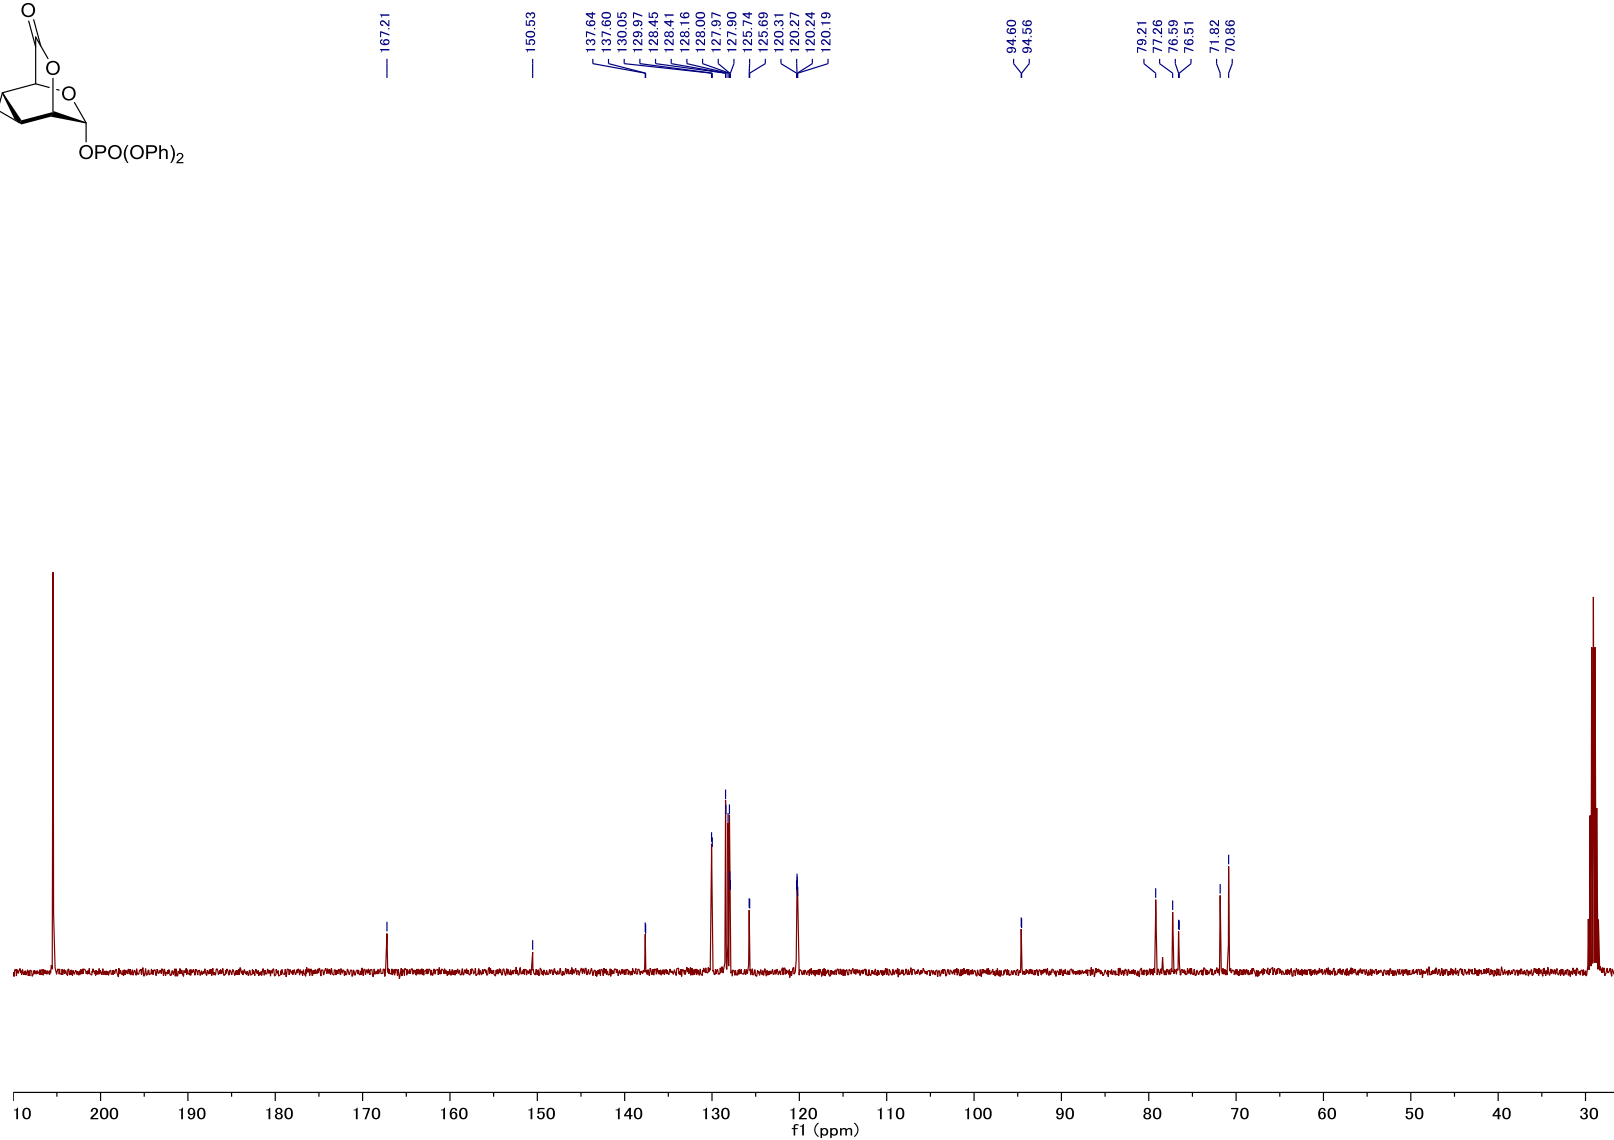

**3-(3',4'-Di-*O*-benzyl- $\beta$ -D-mannopyranurono-2',6'-lacton-1'-yl)propene (11)**  $^1\text{H}$  NMR (400 MHz,  $\text{CDCl}_3$ )

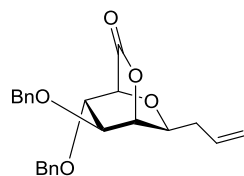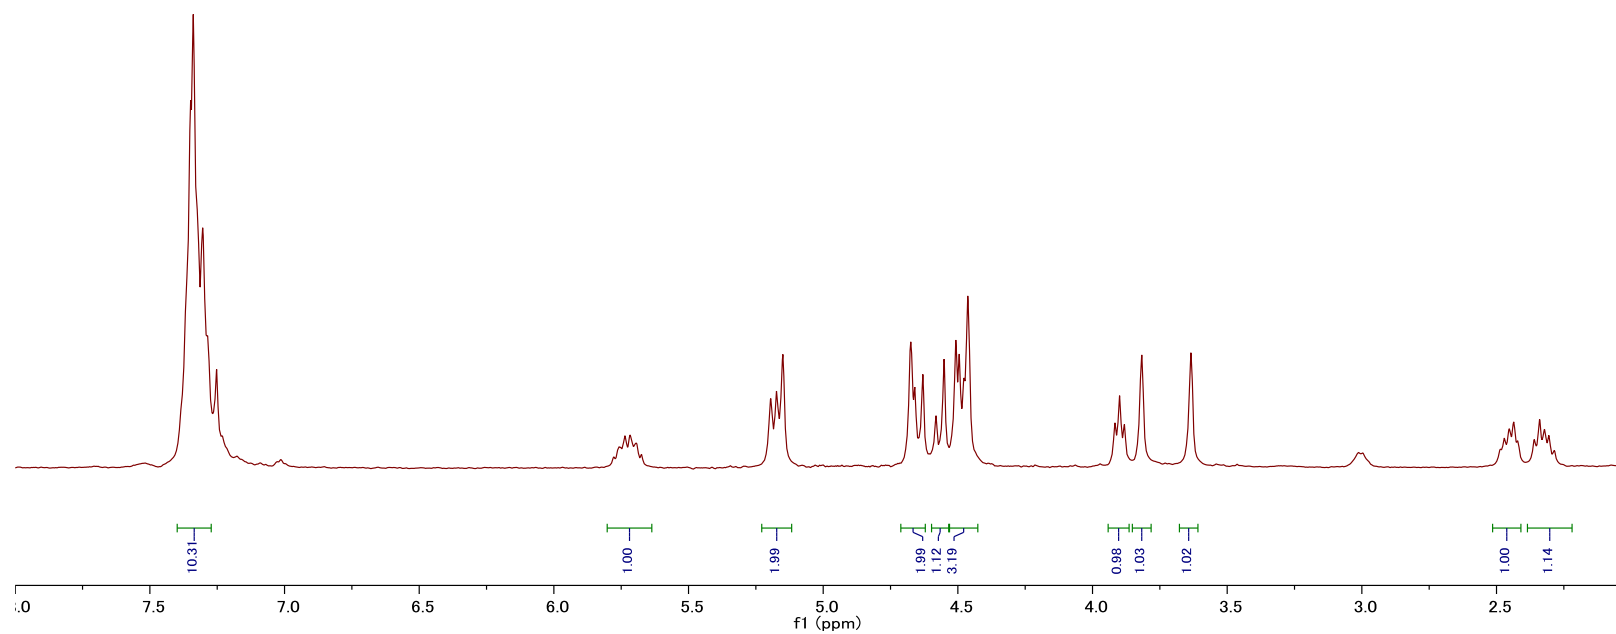



**3-(3',4'-Di-*O*-benzyl- $\beta$ -D-mannopyranurono-2',6'-lacton-1'-yl)propene (11)**  $^{13}\text{C}$  NMR (100 MHz,  $\text{CDCl}_3$ )

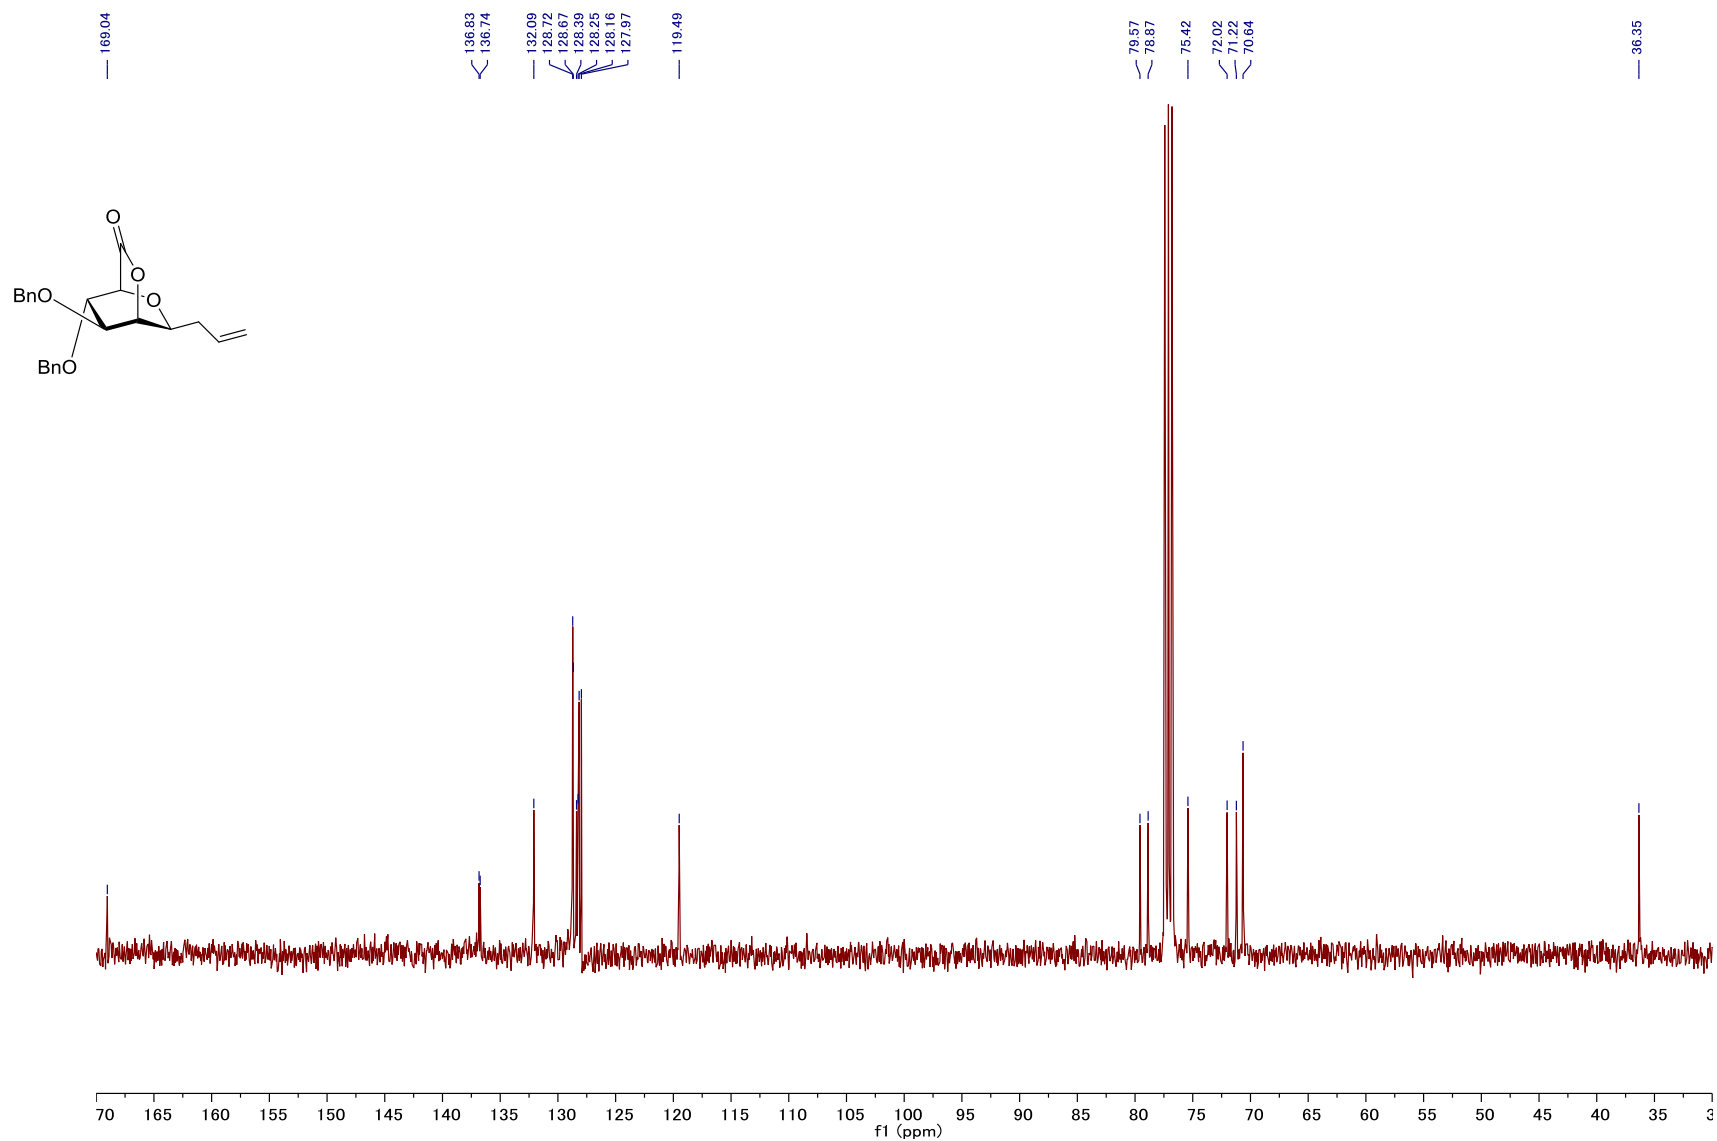

3-(3',4'-Di-*O*-benzyl- $\beta$ -D-mannopyranurono-2',6'-lacton-1'-yl)propene (11)  $^1\text{H}$ - $^1\text{H}$  NOESY (400 MHz,  $\text{CDCl}_3$ )

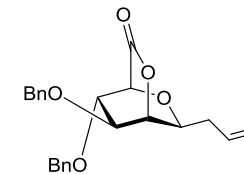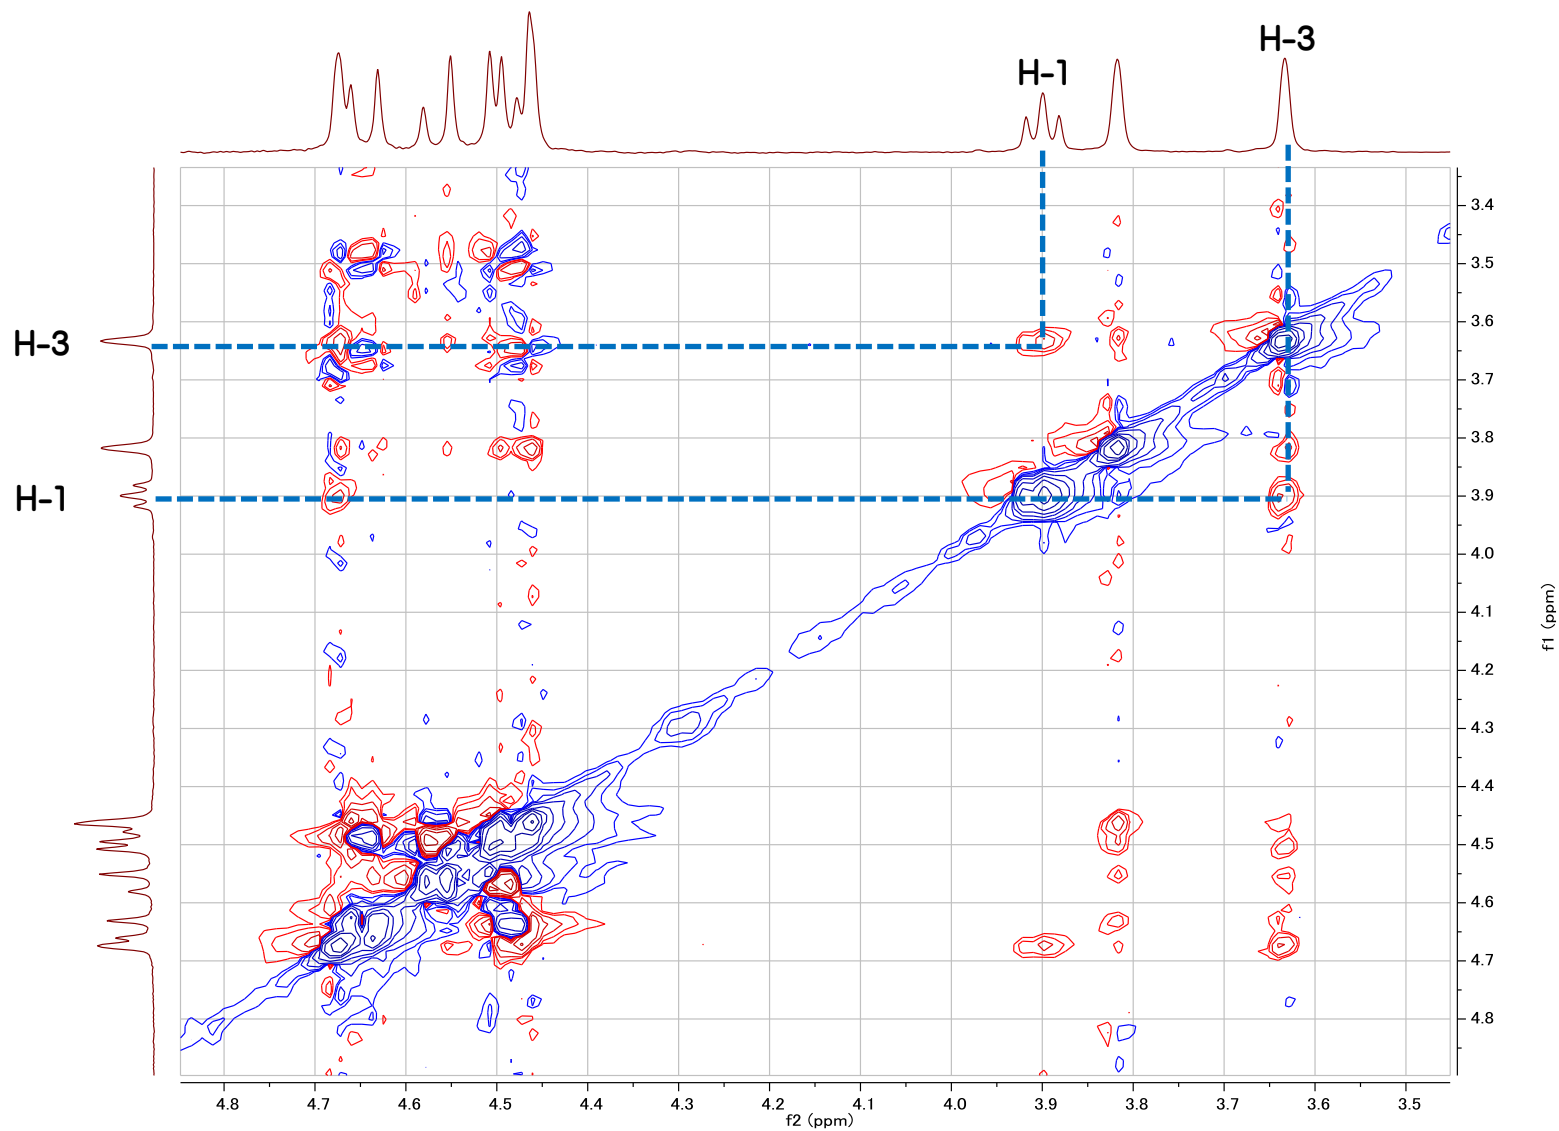

Ethyl

1-thio-3,4-di-*O*-benzyl-6-*O*-tosyl- $\alpha$ -D-mannopyranoside (**S7**)  $^1\text{H}$  NMR (400 MHz,  $\text{CDCl}_3$ )

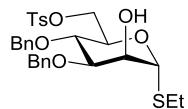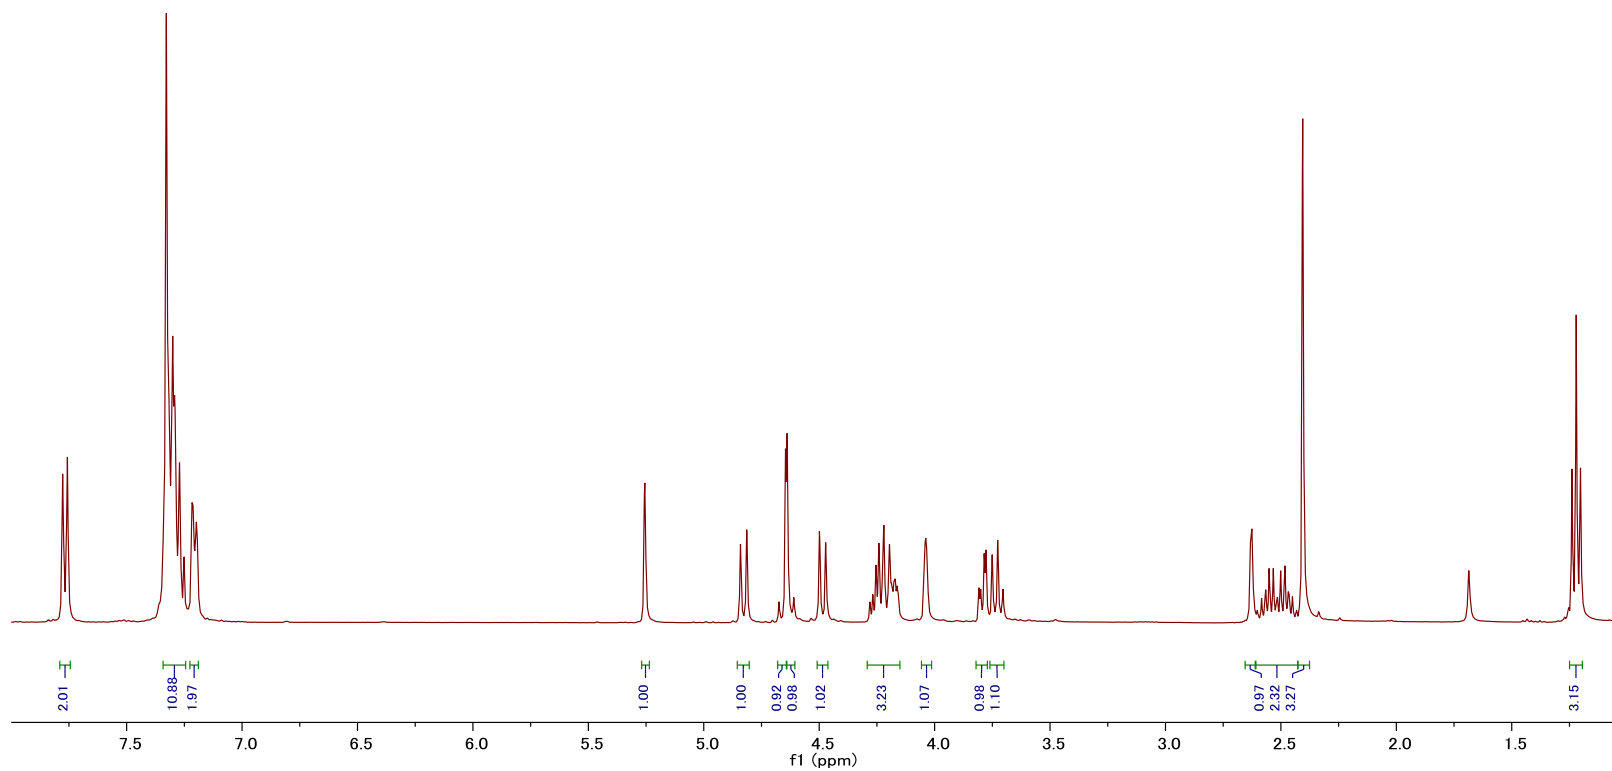

# Ethyl

1-thio-3,4-di-*O*-benzyl-6-*O*-tosyl- $\alpha$ -D-mannopyranoside (S7)  $^{13}\text{C}$  NMR (100 MHz,  $\text{CDCl}_3$ )

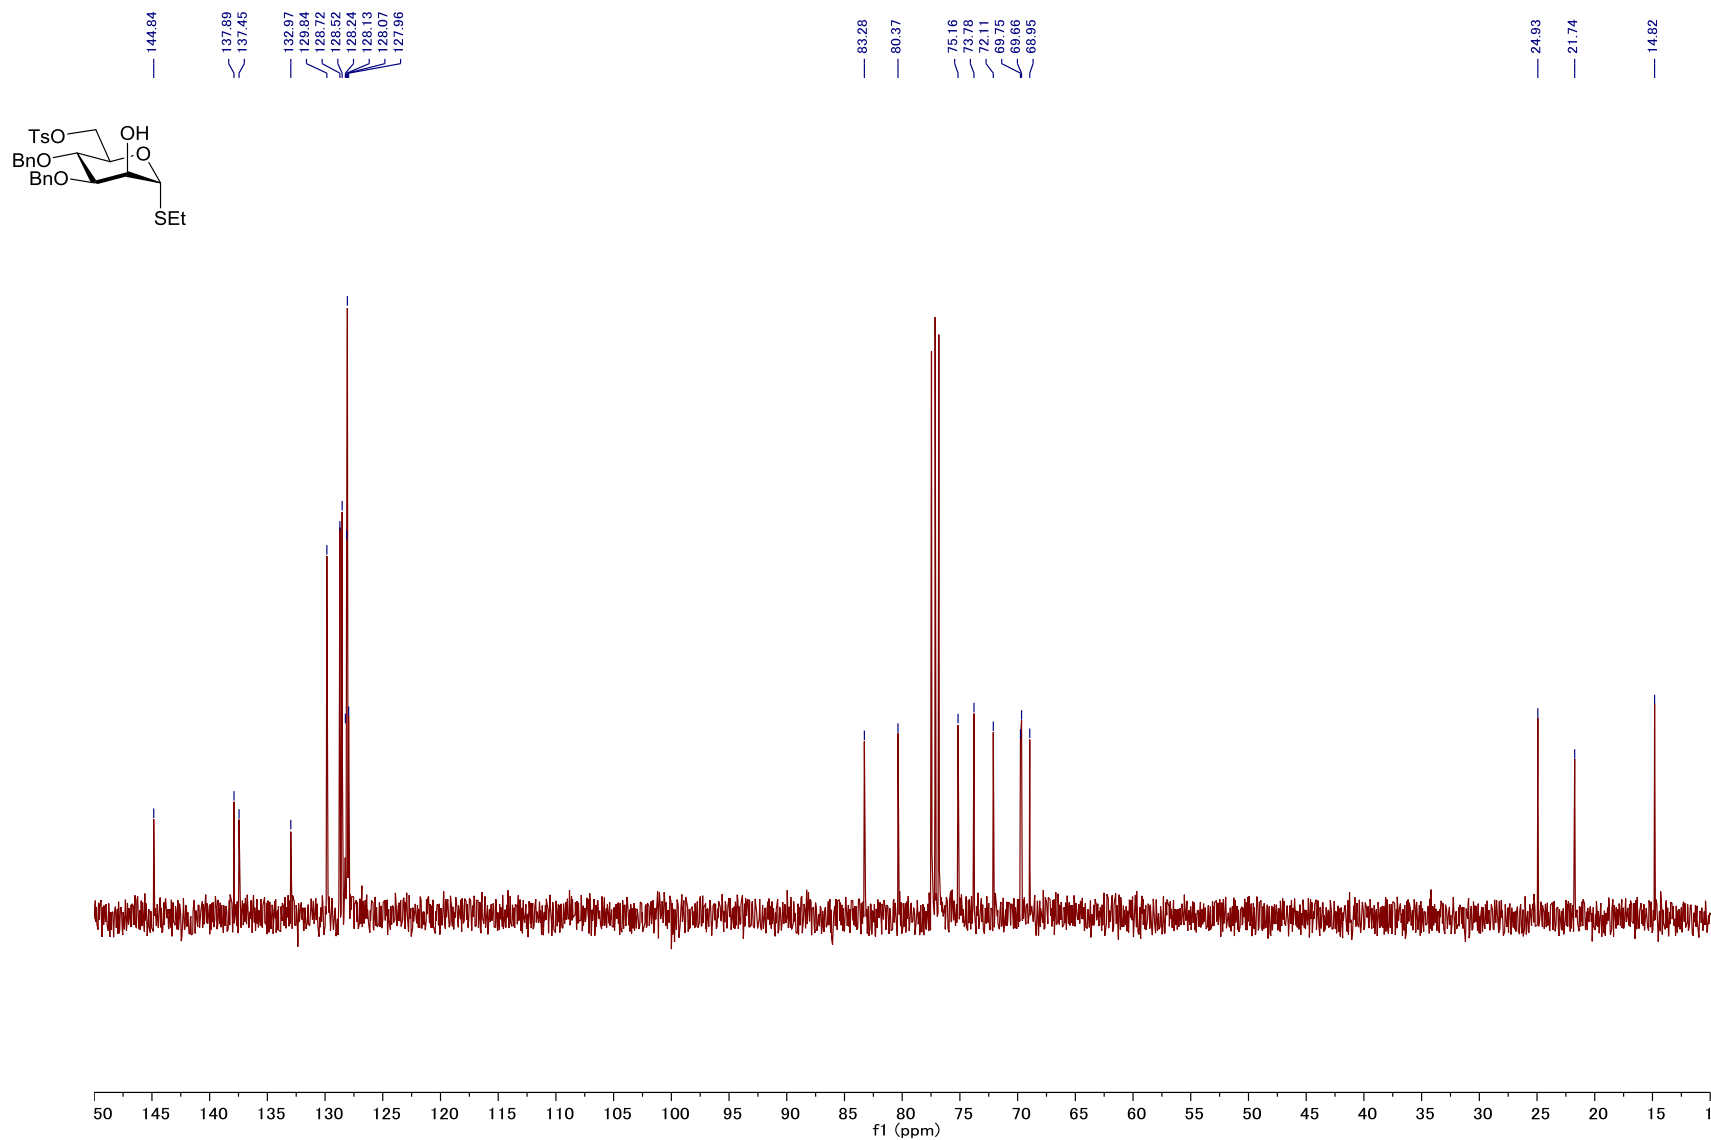

**Ethyl**

**1-thio-3,4-di-*O*-benzyl-2,6-anhydro- $\alpha$ -D-mannopyranoside (S8)**  $^1\text{H}$  NMR (400 MHz,  $\text{CDCl}_3$ )

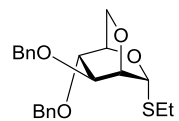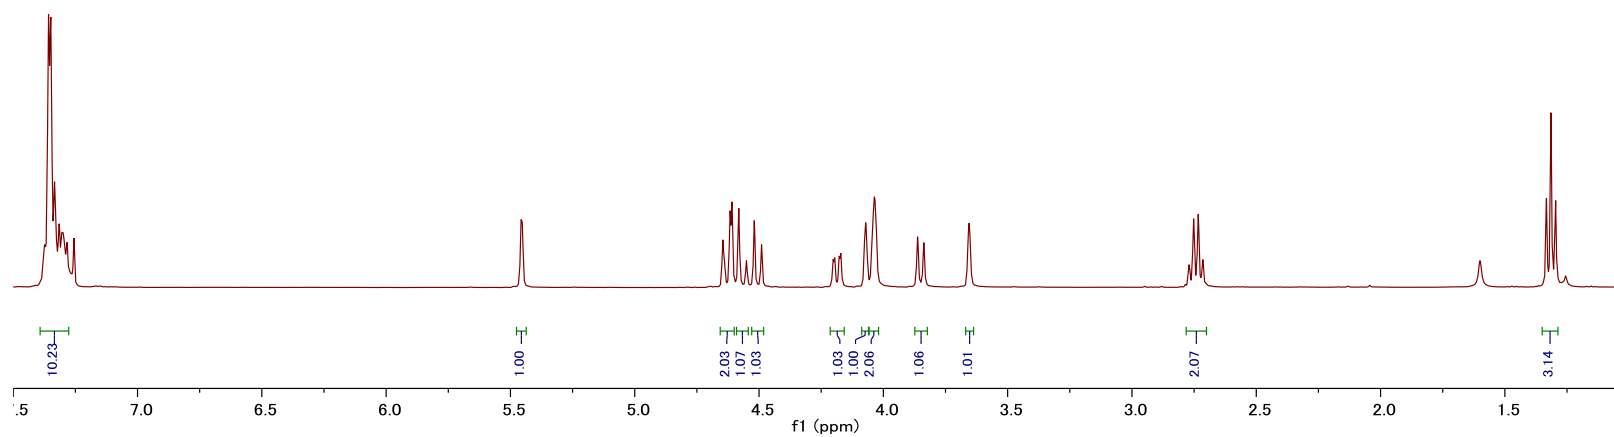

Ethyl

1-thio-3,4-di-*O*-benzyl-2,6-anhydro- $\alpha$ -D-mannopyranoside (S8)  $^{13}\text{C}$  NMR (100 MHz,  $\text{CDCl}_3$ )

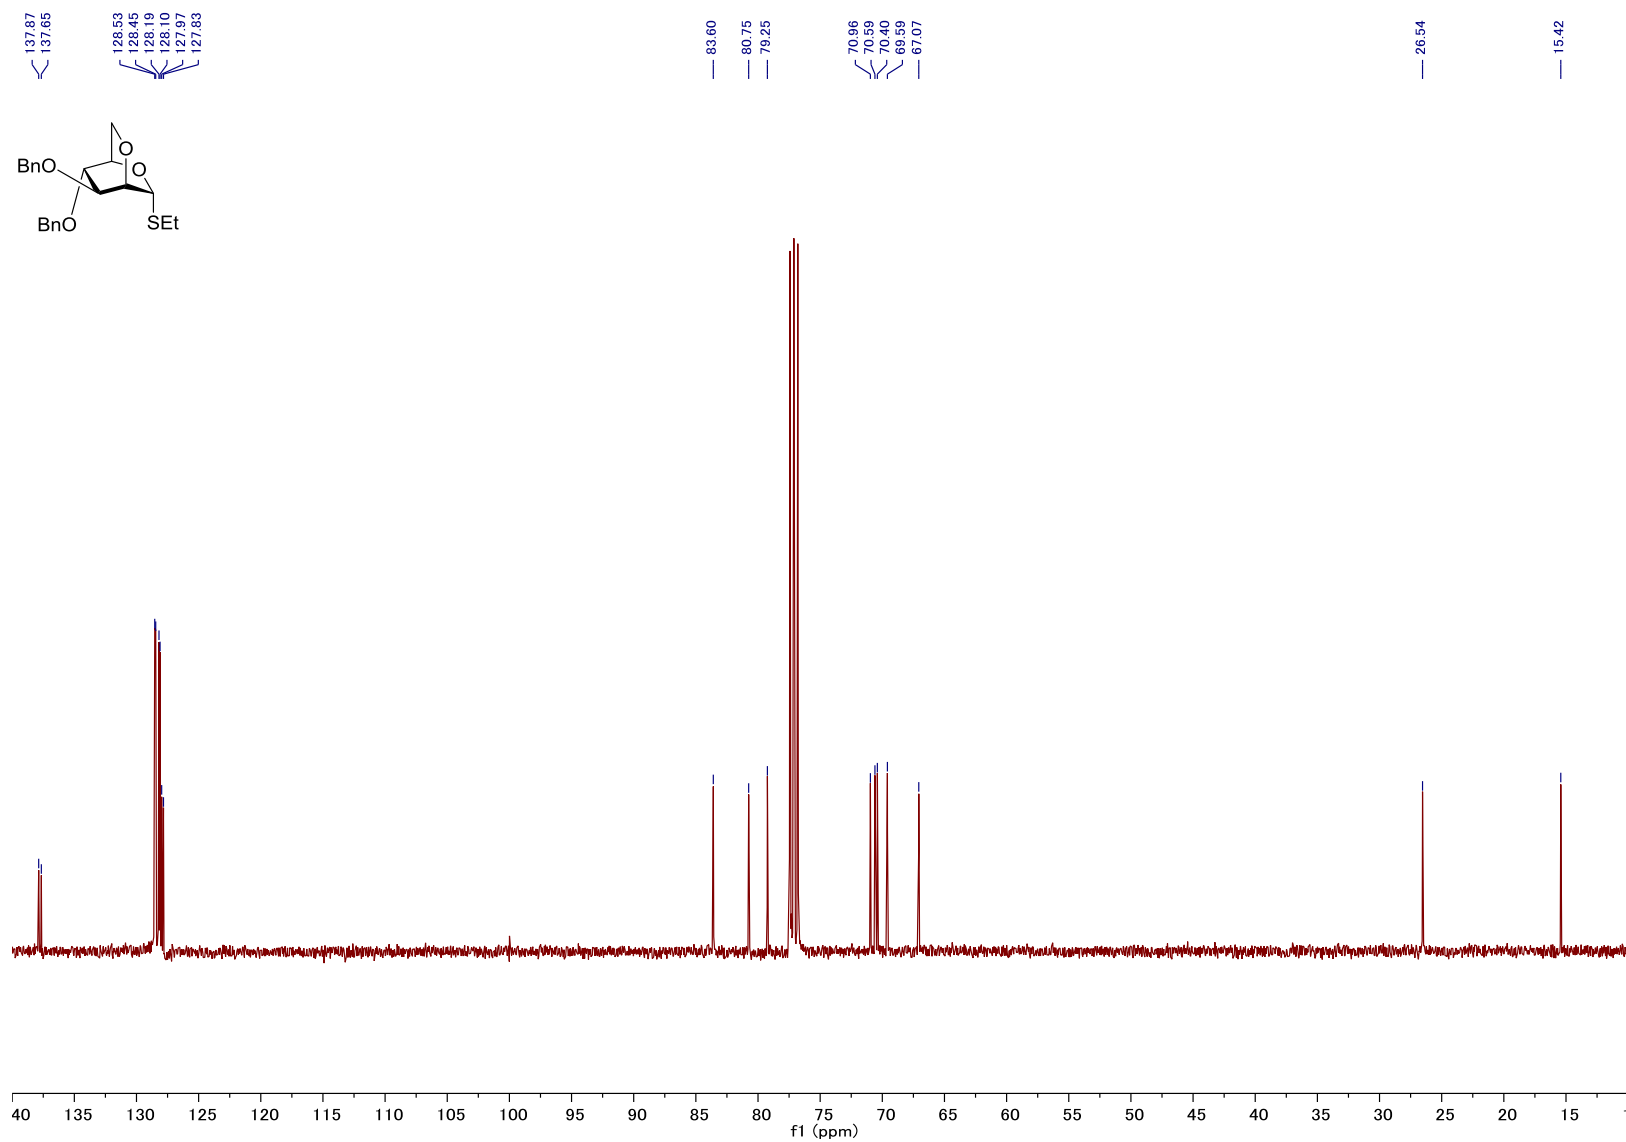

**3,4-Di-*O*-benzyl-2,6-anhydro- $\beta$ -D-mannopyranosyl trichloroacetimidate (12)**  $^1\text{H}$  NMR (400 MHz,  $\text{CDCl}_3$ )

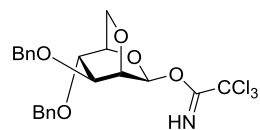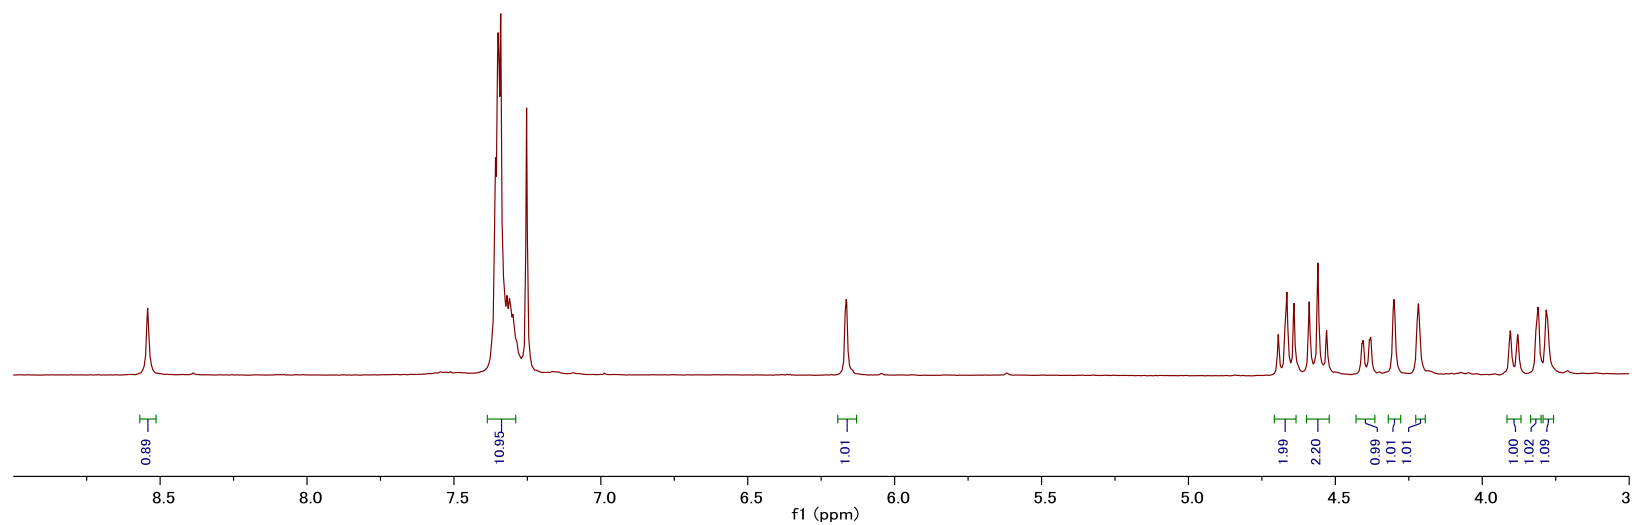

**3,4-Di-*O*-benzyl-2,6-anhydro-β-D-mannopyranosyl trichloroacetimidate (12)** <sup>13</sup>C NMR (100 MHz, CDCl<sub>3</sub>)

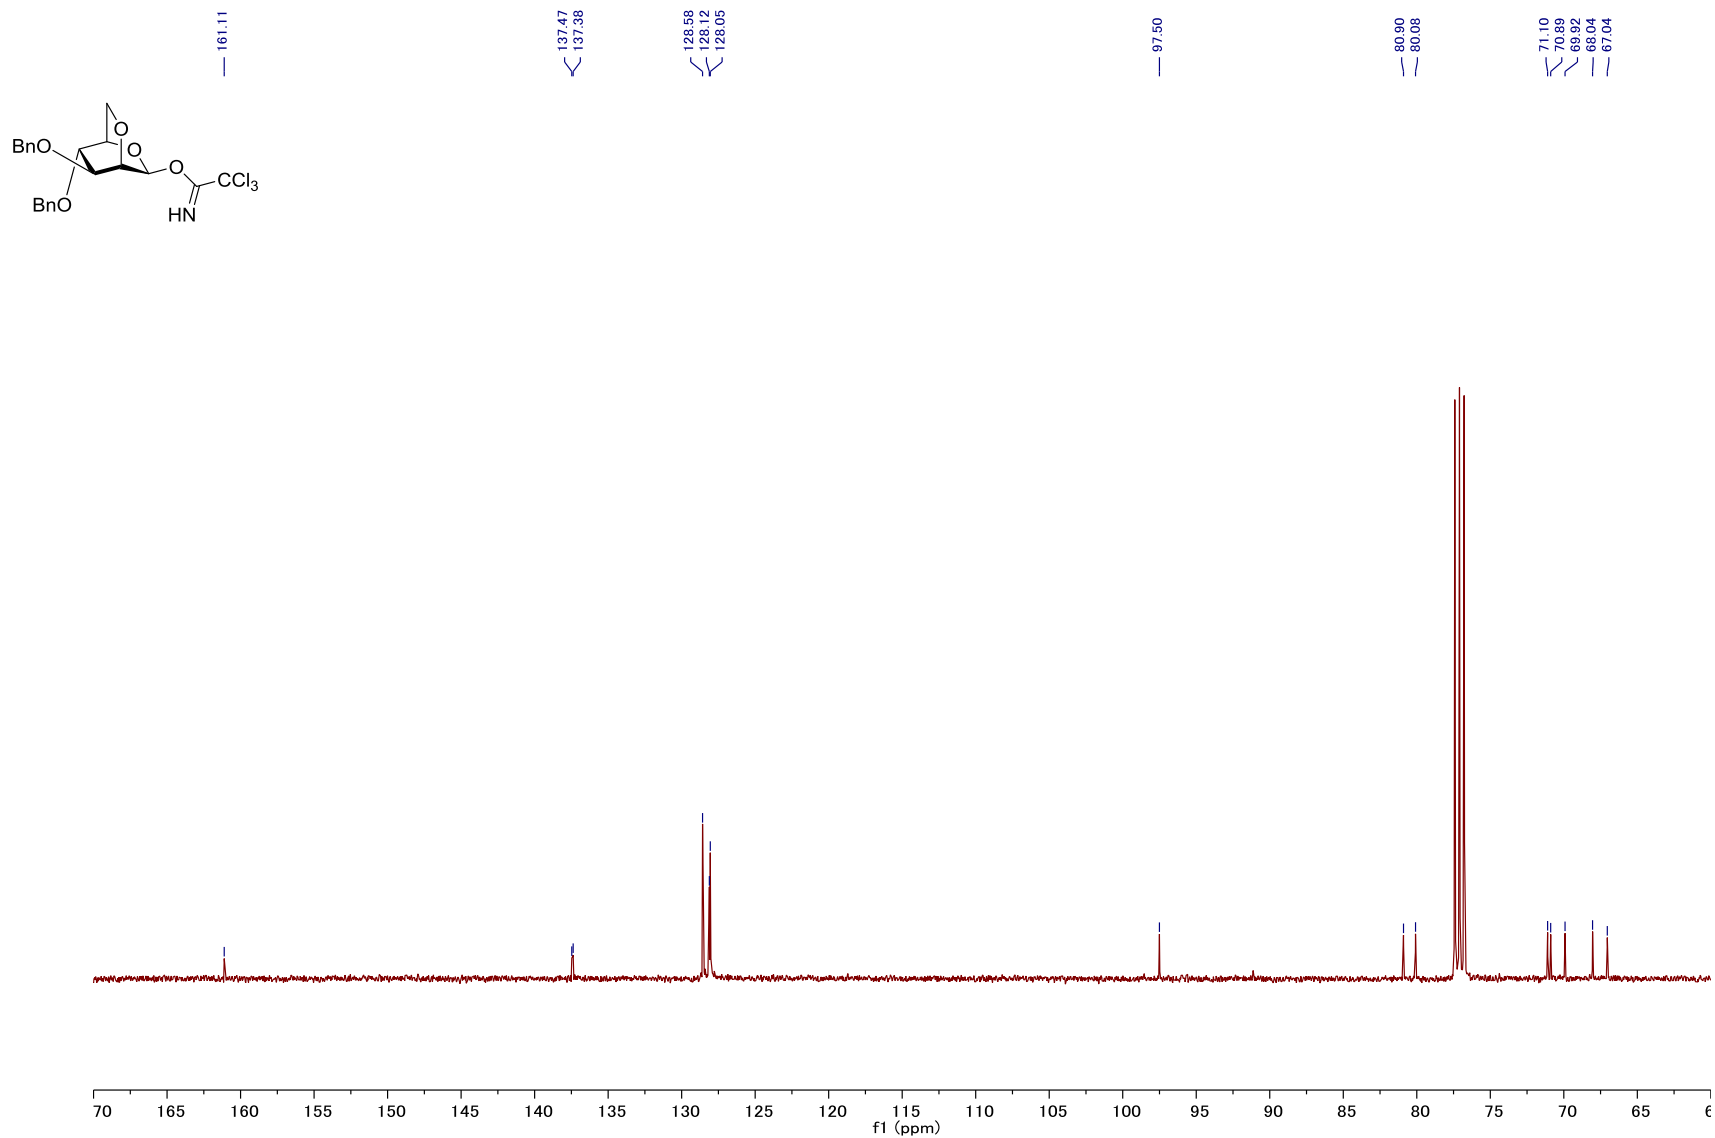



3,4-Di-*O*-benzyl-2,6-anhydro- $\beta$ -D-mannopyranosyl trichloroacetimidate (12)  $^1\text{H}$ - $^1\text{H}$  NOESY (400 MHz,  $\text{CDCl}_3$ )

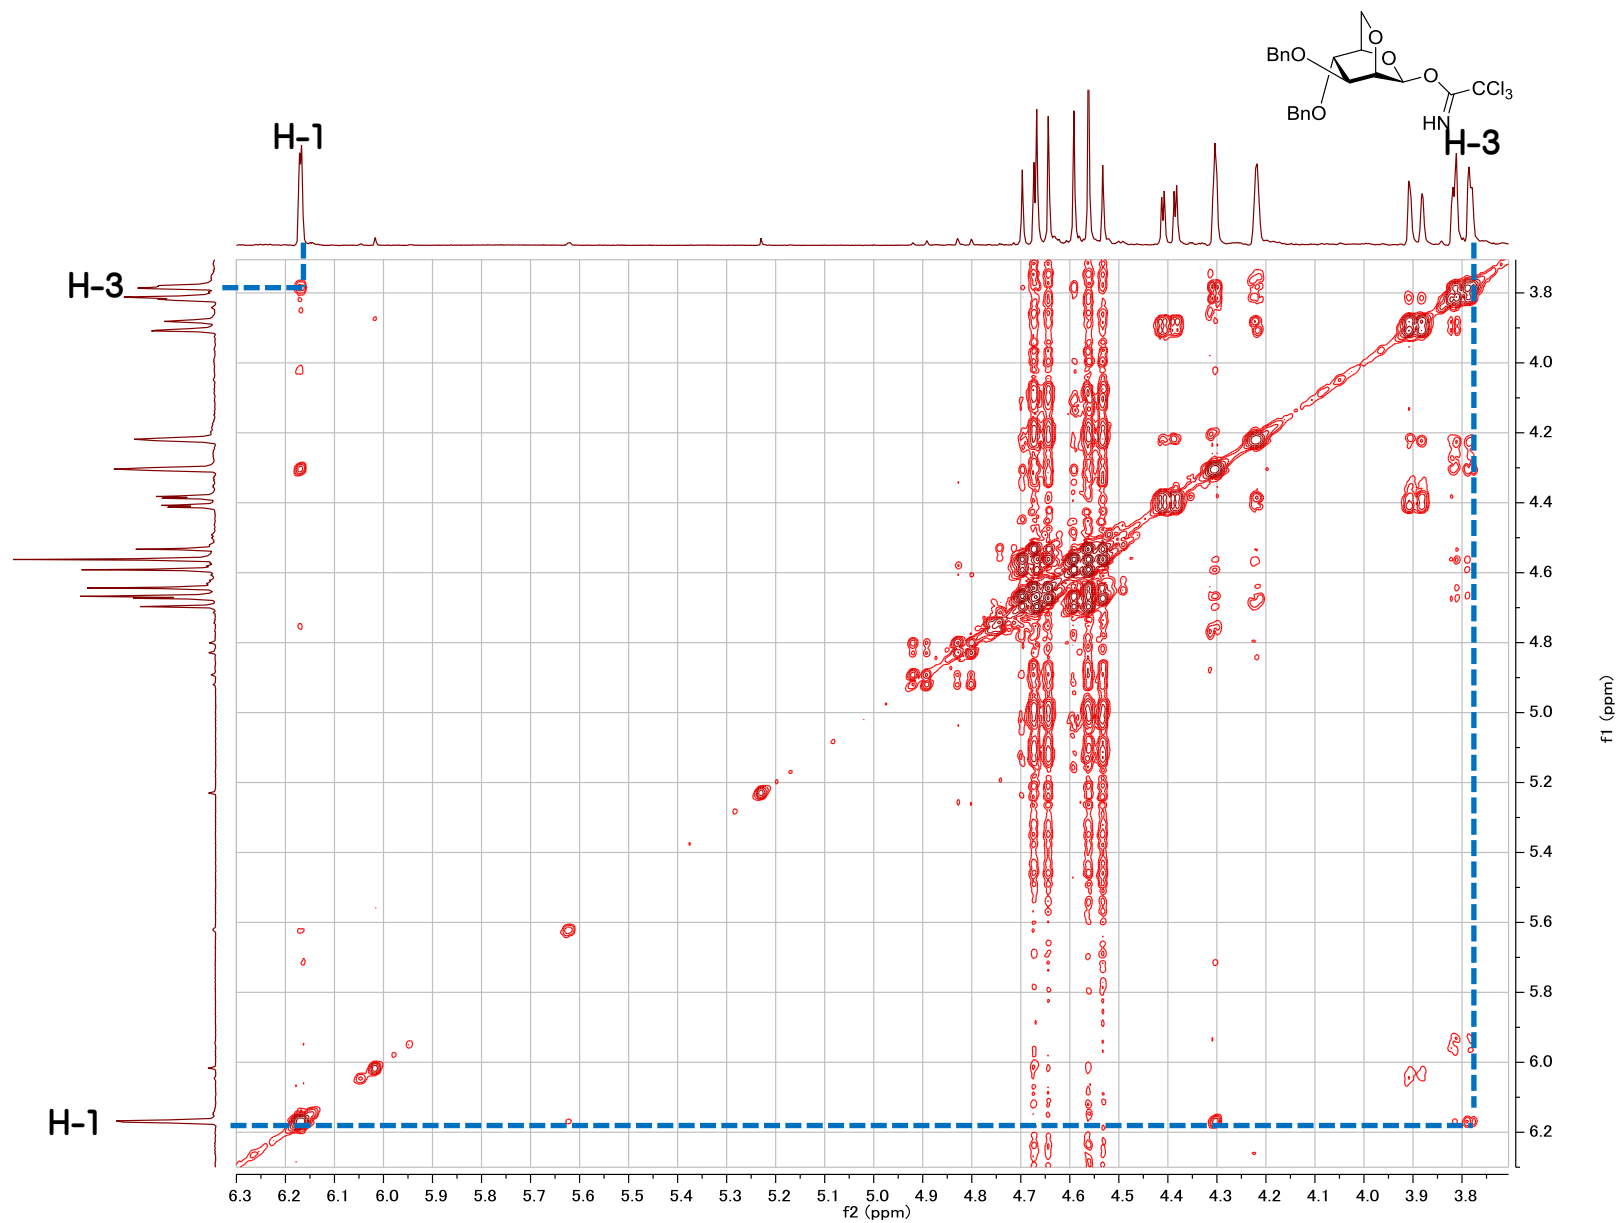

Supplement: Supplementary file 1 [file 6864441]
